# Supplementary material for: A retrospective assessment of different endodontic treatment protocols
Source: PeerJ. 2020 Jan 30;8:e8495. doi: 10.7717/peerj.8495 (PMC6995660; doi:10.7717/peerj.8495)
Supplement: Supplemental Information 1 — All descriptors for analyses as described in the Methods [file peerj-08-8495-s001.xlsx]

## Sheet: raw_data_codes
RPatient	Tooth	Start	Groupcor	Date.of.root.canal.preparation	Date.of.root.canal.filling	No.of.intracanal.medications	Date.of.Retreatment	No.of.retreatments	Retreatment	Root.end.surgery.coded	Root.end.surgery	Event.extracted	Date.of.extraction	Former.retreatments	former.root.end.surgeries	No.of.supportive.periodontal.treatmens	last.visit	Age1	Gender	Success.of.treatment	Event	End.extracted	End	Date.of.root.canal.filling.eq.Date.root.canal.preparation	Tooth.class	Time	Sensitivity.unmc	Gender.umc	Toothclass.umc
1	34	2007-06-25	Group1	2007-06-25	2007-07-11	2	#NULL!	#NULL!	0	0		extracted	2012-11-21	0	0	0	2014-07-22	74	W	3	1	2012-11-21	2012-11-21	false	Premolars	5.41011	VitE	W	Premolar
1	43	2014-06-17	Group 3	2014-06-17	2014-06-17	0	#NULL!	#NULL!	0	0		0	#NULL!	1	0	0	2014-07-22	81	W	0	0	2014-07-22	2014-07-22	true	Anterior	0.0958269	Trep1	W	Anterior
2	26	2000-10-13	Group1	2000-10-13	2001-01-20	4	#NULL!	#NULL!	0	0		0	#NULL!	0	0	8	2016-05-23	61	M	0	0	2016-05-23	2016-05-23	false	Molars	15.6088	Trep1	M	Molar
2	12	2015-09-02	Group 3	2015-10-15	2015-10-15	1	#NULL!	#NULL!	0	0		0	#NULL!	3	0	1	2016-05-23	76	M	0	0	2016-05-23	2016-05-23	true	Anterior	0.722808	Trep1	M	Anterior
3	35	2004-01-21	Group1	2004-01-21	2004-01-21	0	#NULL!	#NULL!	0	0		0	#NULL!	0	0	0	2011-12-15	62	W	0	0	2011-12-15	2011-12-15	true	Premolars	7.89887	VitE	W	Premolar
4	15	2001-04-10	Group1	2001-04-10	2001-04-10	0	#NULL!	#NULL!	0	0		0	#NULL!	0	0	0	2014-11-11	61	M	0	0	2014-11-11	2014-11-11	true	Premolars	13.5883	VitE	M	Premolar
4	33	2005-08-30	Group1	2005-08-30	2005-08-30	0	#NULL!	#NULL!	0	0		extracted	2007-03-08	6	0	0	2014-11-11	65	M	3	1	2007-03-08	2007-03-08	true	Anterior	1.51954	VitE	M	Anterior
4	44	2007-01-19	Group1	2007-01-19	2007-02-05	2	2008-06-12	2	retreatment	0		extracted	2014-01-30	7	0	0	2014-11-11	66	M	3	1	2014-01-30	2008-06-12	false	Premolars	1.39633	Trep1	M	Premolar
4	32	2007-03-08	Group1	2007-03-08	2007-03-22	1	#NULL!	#NULL!	0	0		0	#NULL!	8	0	0	2014-11-11	67	M	0	0	2014-11-11	2014-11-11	false	Anterior	7.67984	Trep1	M	Anterior
5	21	2003-03-12	Group1	2003-03-12	2003-04-01	1	#NULL!	#NULL!	0	0		0	#NULL!	0	0	0	2004-03-02	62	M	0	0	2004-03-02	2004-03-02	false	Anterior	0.974696	Trep1	M	Anterior
5	12	2003-03-12	Group1	2003-03-12	2003-04-01	1	#NULL!	#NULL!	0	0		0	#NULL!	0	0	0	2004-03-02	62	M	0	0	2004-03-02	2004-03-02	false	Anterior	0.974696	VitE	M	Anterior
6	23	2000-02-10	Group1	2000-02-10	2000-02-24	1	#NULL!	#NULL!	0	0		0	#NULL!	0	0	0	2009-01-26	69	W	0	0	2009-01-26	2009-01-26	false	Anterior	8.96118	Trep1	W	Anterior
6	32	2002-08-12	Group1	2002-08-12	2002-08-12	0	#NULL!	#NULL!	0	0		0	#NULL!	4	0	0	2009-01-26	72	W	0	0	2009-01-26	2009-01-26	true	Anterior	6.45873	Trep1	W	Anterior
6	41	2003-02-06	Group1	2003-02-06	2003-03-11	3	#NULL!	#NULL!	0	0		0	#NULL!	5	0	0	2009-01-26	72	W	0	0	2009-01-26	2009-01-26	false	Anterior	5.97138	Trep1	W	Anterior
6	24	2003-02-24	Group1	2003-02-24	2003-04-09	3	2003-04-29	2	retreatment	0		extracted	2008-07-15	6	0	0	2009-01-26	72	W	3	1	2008-07-15	2003-04-29	false	Premolars	0.175226	Trep1	W	Premolar
7	15	2002-10-28	Group1	2002-10-28	2003-02-13	4	#NULL!	#NULL!	0	0		extracted	2012-09-24	0	0	1	2014-03-11	45	M	3	1	2012-09-24	2012-09-24	false	Premolars	9.9085	Trep1	M	Premolar
7	42	2003-07-10	Group1	2003-07-10	2003-08-27	2	#NULL!	#NULL!	0	0		0	#NULL!	1	0	3	2014-03-11	46	M	0	0	2014-03-11	2014-03-11	false	Anterior	10.6696	VitE	M	Anterior
7	27	2004-01-09	Group1	2004-01-09	2004-05-18	3	#NULL!	#NULL!	0	0		extracted	2011-06-14	2	0	0	2014-03-11	46	M	3	1	2011-06-14	2011-06-14	false	Molars	7.42795	Trep1	M	Molar
8	25	2006-08-07	Group1	2006-08-07	2006-08-16	1	#NULL!	#NULL!	0	0		extracted	2008-04-22	1	0	0	2016-07-11	63	W	3	1	2008-04-22	2008-04-22	false	Premolars	1.70846	VitE	W	Premolar
9	17	2002-11-05	Group1	2002-11-05	2002-11-20	2	#NULL!	#NULL!	0	0		extracted	2008-11-19	0	0	0	2014-05-28	60	W	3	1	2008-11-19	2008-11-19	false	Molars	6.03983	VitE	W	Molar
9	47	2003-01-02	Group1	2003-01-02	2003-02-10	3	2008-01-15	5	retreatment	0		0	#NULL!	1	0	10	2014-05-28	60	W	1	1	2014-05-28	2008-01-15	false	Molars	5.03502	VitE	W	Molar
9	45	2008-05-21	Group1	2008-05-21	2008-06-10	1	#NULL!	#NULL!	0	0		0	#NULL!	4	0	5	2014-05-28	65	W	0	0	2014-05-28	2014-05-28	false	Premolars	6.01793	VitE	W	Premolar
9	36	2012-10-16	Group 3	2012-10-16	2012-10-16	0	#NULL!	#NULL!	0	0		0	#NULL!	5	0	3	2014-05-28	70	W	0	0	2014-05-28	2014-05-28	true	Molars	1.61263	VitE	W	Molar
10	46	1999-06-22	Group1	1999-06-22	1999-07-20	1	#NULL!	#NULL!	0	0		extracted	2012-06-27	0	0	5	2016-08-22	41	M	3	1	2012-06-27	2012-06-27	false	Molars	13.016	VitE	M	Molar
10	34	2000-06-20	Group1	2012-01-18	2000-08-07	2	2012-01-18	3	retreatment	0		0	#NULL!	2	0	20	2016-08-22	42	M	1	1	2016-08-22	2012-01-18	false	Premolars	11.5786	VitE	M	Premolar
10	26	2013-08-29	Group 3	2013-08-29	2013-08-29	0	#NULL!	#NULL!	0	0		0	#NULL!	7	0	6	2016-08-22	55	M	0	0	2016-08-22	2016-08-22	true	Molars	2.98158	Trep1	M	Molar
11	46	2000-01-07	Group1	2000-01-07	2000-02-07	2	#NULL!	#NULL!	0	0		0	#NULL!	0	0	0	2016-08-10	39	M	0	0	2016-08-10	2016-08-10	false	Molars	16.5917	VitE	M	Molar
12	21	2000-05-04	Group1	2000-05-04	2000-05-04	0	#NULL!	#NULL!	0	0		extracted	2011-07-08	0	0	0	2015-12-23	77	M	3	1	2011-07-08	2011-07-08	true	Anterior	11.1762	VitE	M	Anterior
13	37	2001-03-19	Group1	2001-03-19	2001-09-18	5	#NULL!	#NULL!	0	0		extracted	2007-05-03	0	0	0	2014-11-25	56	W	3	1	2007-05-03	2007-05-03	false	Molars	6.12197	Trep1	W	Molar
14	15	2005-10-24	Group1	2005-10-24	2005-10-24	0	#NULL!	#NULL!	0	0		0	#NULL!	0	0	9	2016-06-09	70	M	0	0	2016-06-09	2016-06-09	true	Premolars	10.6258	VitE	M	Premolar
14	14	2005-10-24	Group1	2005-10-24	2005-10-24	0	#NULL!	#NULL!	0	0		0	#NULL!	0	0	9	2016-06-09	70	M	0	0	2016-06-09	2016-06-09	true	Premolars	10.6258	VitE	M	Premolar
15	45	2011-03-31	Group 2	2011-03-31	2011-04-14	1	#NULL!	#NULL!	0	0		0	#NULL!	0	0	7	2014-03-27	71	M	0	0	2014-03-27	2014-03-27	false	Premolars	2.9898	Trep1	M	Premolar
16	34	2000-10-16	Group1	2000-10-16	2000-11-08	1	#NULL!	#NULL!	0	0		0	#NULL!	0	0	9	2016-08-02	56	W	0	0	2016-08-02	2016-08-02	false	Premolars	15.795	Trep1	W	Premolar
17	47	2002-12-02	Group1	2002-12-02	2003-05-08	8	#NULL!	#NULL!	0	0		extracted	2006-02-09	0	0	0	2006-02-09	57	W	3	1	2006-02-09	2006-02-09	false	Molars	3.18967	Trep1	W	Molar
18	47	2014-04-10	Group 3	2014-04-10	2014-05-08	1	#NULL!	#NULL!	0	0		0	#NULL!	1	0	2	2016-02-29	85	M	0	0	2016-02-29	2016-02-29	false	Molars	1.88916	VitE	M	Molar
19	21	2011-09-20	Group1	2011-09-20	2011-10-20	1	#NULL!	#NULL!	0	0		0	#NULL!	0	0	1	2012-09-13	72	M	0	0	2012-09-13	2012-09-13	false	Anterior	0.98291	Trep1	M	Anterior
20	21	2009-02-03	Group1	2009-02-03	2009-02-03	0	#NULL!	#NULL!	0	0		extracted	2015-09-29	3	0	8	2016-05-30	71	W	3	1	2015-09-29	2015-09-29	true	Anterior	6.65039	Trep1	W	Anterior
20	42	2011-07-05	Group 2	2011-07-05	2011-07-28	1	#NULL!	#NULL!	0	0		extracted	2013-10-29	4	0	9	2016-05-30	73	W	3	1	2013-10-29	2013-10-29	false	Anterior	2.31901	Trep1	W	Anterior
21	17	2007-02-22	Group1	2007-02-22	2007-06-28	3	#NULL!	#NULL!	0	0		0	#NULL!	0	0	7	2016-01-05	57	M	0	0	2016-01-05	2016-01-05	false	Molars	8.86809	VitE	M	Molar
21	26	2007-04-24	Group1	2007-04-24	2007-06-28	3	#NULL!	#NULL!	0	0		0	#NULL!	1	0	7	2016-01-05	57	M	0	0	2016-01-05	2016-01-05	false	Molars	8.70108	Trep1	M	Molar
22	35	2004-08-23	Group1	2004-08-23	2004-09-07	1	#NULL!	#NULL!	0	0		0	#NULL!	1	0	0	2004-10-20	49	W	0	0	2004-10-20	2004-10-20	false	Premolars	0.158799	VitE	W	Premolar
23	35	2001-10-18	Group1	2001-10-18	2001-11-07	1	#NULL!	#NULL!	0	0		extracted	2003-04-02	0	0	0	2016-09-26	61	M	3	1	2003-04-02	2003-04-02	false	Premolars	1.45383	Trep1	M	Premolar
23	11	2015-03-26	Group 3	2015-03-26	2015-04-16	2	#NULL!	#NULL!	0	0		0	#NULL!	2	0	1	2016-09-26	75	M	0	0	2016-09-26	2016-09-26	false	Anterior	1.50585	Trep1	M	Anterior
24	47	2006-12-12	Group1	2006-12-12	2007-04-18	2	#NULL!	#NULL!	0	0		0	#NULL!	1	0	0	2016-01-19	50	M	0	0	2016-01-19	2016-01-19	false	Molars	9.10355	Trep1	M	Molar
25	26	2001-08-06	Group1	2001-08-06	2002-05-13	3	#NULL!	#NULL!	0	0		0	#NULL!	0	0	0	2003-08-13	43	W	0	0	2003-08-13	2003-08-13	false	Molars	2.01784	VitE	W	Molar
25	14	2002-04-18	Group1	2002-04-18	2002-05-13	2	#NULL!	#NULL!	0	0		0	#NULL!	1	0	0	2003-08-13	44	W	0	0	2003-08-13	2003-08-13	false	Premolars	1.31967	Trep1	W	Premolar
26	26	2000-12-12	Group1	2000-12-12	2001-03-21	4	2001-04-10	1	retreatment	0		0	#NULL!	0	0	0	2010-05-18	44	W	1	1	2010-05-18	2001-04-10	false	Molars	0.325811	VitE	W	Molar
27	12	2000-02-03	Group1	2000-02-03	2000-02-03	0	#NULL!	#NULL!	0	0		0	#NULL!	0	0	6	2013-11-12	59	W	0	0	2013-11-12	2013-11-12	true	Anterior	13.7744	Trep1	W	Anterior
28	17	2008-01-30	Group1	2008-01-30	2008-02-11	1	#NULL!	#NULL!	0	0		0	#NULL!	0	0	6	2016-09-13	68	M	0	0	2016-09-13	2016-09-13	false	Molars	8.62168	VitE	M	Molar
29	35	2004-09-30	Group1	2004-09-30	2004-12-07	3	#NULL!	#NULL!	0	0		0	#NULL!	0	0	0	2007-07-17	81	W	0	0	2007-07-17	2007-07-17	false	Premolars	2.79267	Trep1	W	Premolar
30	35	2006-10-23	Group1	2006-10-23	2006-11-20	1	#NULL!	#NULL!	0	0		0	#NULL!	0	0	0	2012-02-27	73	W	0	0	2012-02-27	2012-02-27	false	Premolars	5.34714	Trep1	W	Premolar
30	43	2007-10-09	Group1	2007-10-24	2007-10-24	0	#NULL!	#NULL!	0	0		extracted	2011-05-11	1	0	0	2012-02-27	74	W	3	1	2011-05-11	2011-05-11	true	Anterior	3.58666	Trep1	W	Anterior
31	43	2001-06-12	Group1	2001-06-12	2001-06-12	0	#NULL!	#NULL!	0	0		extracted	2007-01-22	0	0	1	2016-06-27	70	W	3	1	2007-01-22	2007-01-22	true	Anterior	5.61272	Trep1	W	Anterior
32	47	2007-01-08	Group1	2007-01-08	2007-01-29	2	#NULL!	#NULL!	0	0		0	#NULL!	0	0	0	2010-10-20	83	W	0	0	2010-10-20	2010-10-20	false	Molars	3.78105	VitE	W	Molar
33	43	2000-05-17	Group1	2000-05-17	2000-05-17	0	#NULL!	#NULL!	0	0		0	#NULL!	1	0	0	2004-09-29	80	M	0	0	2004-09-29	2004-09-29	true	Anterior	4.36971	Trep1	M	Anterior
33	33	2003-02-12	Group1	2003-02-12	2003-02-19	1	#NULL!	#NULL!	0	0		0	#NULL!	2	0	0	2004-09-29	83	M	0	0	2004-09-29	2004-09-29	false	Anterior	1.62906	Trep1	M	Anterior
34	13	2000-11-15	Group1	2000-11-15	2000-11-15	0	#NULL!	#NULL!	0	0		0	#NULL!	0	0	0	2011-04-21	53	M	0	0	2011-04-21	2011-04-21	true	Anterior	10.4287	Trep1	M	Anterior
35	47	2002-11-19	Group1	2002-11-19	2003-02-04	3	#NULL!	#NULL!	0	0		0	#NULL!	0	0	0	2010-11-29	66	W	0	0	2010-11-29	2010-11-29	false	Molars	8.02755	VitE	W	Molar
36	15	2003-05-12	Group1	2003-05-12	2003-06-24	1	#NULL!	#NULL!	0	0		0	#NULL!	0	0	0	2003-06-24	59	M	0	0	2003-06-24	2003-06-24	false	Premolars	0.11773	Trep1	M	Premolar
37	34	2000-08-24	Group1	2000-08-24	2000-08-24	0	#NULL!	#NULL!	0	0		0	#NULL!	0	0	0	2014-10-14	65	W	0	0	2014-10-14	2014-10-14	true	Premolars	14.1386	VitE	W	Premolar
37	45	2001-08-13	Group1	2001-08-13	2001-09-12	1	#NULL!	#NULL!	0	0		0	#NULL!	1	0	0	2014-10-14	66	W	0	0	2014-10-14	2014-10-14	false	Premolars	13.1694	Trep1	W	Premolar
37	13	2002-11-18	Group1	2002-11-18	2002-11-22	1	#NULL!	#NULL!	0	0		extracted	2005-05-25	2	0	0	2014-10-14	68	W	3	1	2005-05-25	2005-05-25	false	Anterior	2.51614	Trep1	W	Anterior
37	22	2005-06-23	Group1	2005-06-23	2005-07-11	1	#NULL!	#NULL!	0	0		extracted	2005-09-19	3	0	0	2014-10-14	70	W	3	1	2005-09-19	2005-09-19	false	Anterior	0.240936	VitE	W	Anterior
37	32	2014-03-11	Group 3	2014-03-11	2014-03-11	0	#NULL!	#NULL!	0	0		0	#NULL!	4	0	0	2014-10-14	79	W	0	0	2014-10-14	2014-10-14	true	Anterior	0.594127	VitE	W	Anterior
38	46	2002-03-27	Group1	2002-03-27	2002-05-06	3	#NULL!	#NULL!	0	0		extracted	2013-07-03	0	0	1	2014-08-28	53	W	3	1	2013-07-03	2013-07-03	false	Molars	11.2692	VitE	W	Molar
38	15	2002-06-17	Group1	2002-06-17	2002-06-26	1	#NULL!	#NULL!	0	0		0	#NULL!	2	0	1	2014-08-28	53	W	0	0	2014-08-28	2014-08-28	false	Premolars	12.1974	VitE	W	Premolar
39	13	2000-01-19	Group1	2000-01-19	2000-02-03	1	#NULL!	#NULL!	0	0		extracted	2005-06-26	0	0	0	2007-02-21	78	W	3	1	2005-06-26	2005-06-26	false	Anterior	5.43475	Trep1	W	Anterior
39	24	2002-08-21	Group1	2002-08-21	2002-09-30	1	#NULL!	#NULL!	0	0		extracted	2004-11-03	1	0	0	2007-02-21	81	W	3	1	2004-11-03	2004-11-03	false	Premolars	2.20402	Trep1	W	Premolar
40	45	2004-01-20	Group1	2004-01-20	2004-02-05	2	#NULL!	#NULL!	0	0		0	#NULL!	0	0	0	2005-05-12	78	M	0	0	2005-05-12	2005-05-12	false	Premolars	1.30872	VitE	M	Premolar
41	47	2002-07-25	Group1	2002-07-25	2002-08-27	2	#NULL!	#NULL!	0	0		extracted	2010-04-22	0	0	0	2016-06-13	64	M	3	1	2010-04-22	2010-04-22	false	Molars	7.74281	Trep1	M	Molar
41	21	2009-07-28	Group1	2009-07-28	2009-07-28	0	#NULL!	#NULL!	0	0		0	#NULL!	2	0	1	2016-06-13	71	M	0	0	2016-06-13	2016-06-13	true	Anterior	6.87763	VitE	M	Anterior
42	17	2006-05-22	Group1	2006-05-22	2006-07-10	2	#NULL!	#NULL!	0	0		0	#NULL!	0	0	7	2016-08-02	62	M	0	0	2016-08-02	2016-08-02	false	Molars	10.1987	VitE	M	Molar
43	34	2001-08-03	Group1	2001-08-03	2001-10-16	3	#NULL!	#NULL!	0	0		extracted	2014-11-24	0	0	0	2015-04-08	67	M	3	1	2014-11-24	2014-11-24	false	Premolars	13.309	VitE	M	Premolar
43	15	2004-10-14	Group1	2004-10-14	2004-11-16	2	2005-12-20	5	retreatment	0		0	#NULL!	2	0	0	2015-04-08	71	M	1	1	2015-04-08	2005-12-20	false	Premolars	1.18278	Trep1	M	Premolar
43	25	2010-04-06	Group 2	2010-04-06	2010-04-20	1	#NULL!	#NULL!	0	0		0	#NULL!	5	0	0	2015-04-08	76	M	0	0	2015-04-08	2015-04-08	false	Premolars	5.0049	Trep1	M	Premolar
43	44	2014-02-19	Group 3	2014-02-19	2014-03-17	1	#NULL!	#NULL!	0	0		0	#NULL!	6	0	0	2015-04-08	80	M	0	0	2015-04-08	2015-04-08	false	Premolars	1.13076	VitE	M	Premolar
44	46	1999-09-09	Group1	1999-09-09	1999-10-06	1	#NULL!	#NULL!	0	0		0	#NULL!	0	0	0	2009-05-25	59	M	0	0	2009-05-25	2009-05-25	false	Molars	9.70863	Trep1	M	Molar
45	42	2009-05-14	Group 2	2009-05-14	2009-06-23	0	#NULL!	#NULL!	0	0		0	#NULL!	0	0	0	2010-02-01	89	W	0	0	2010-02-01	2010-02-01	false	Anterior	0.720071	VitE	W	Anterior
45	32	2009-05-14	Group 2	2009-05-14	2009-06-23	0	#NULL!	#NULL!	0	0		0	#NULL!	0	0	0	2010-02-01	89	W	0	0	2010-02-01	2010-02-01	false	Anterior	0.720071	VitE	W	Anterior
45	34	2009-06-30	Group1	2009-06-30	2009-07-07	1	#NULL!	#NULL!	0	0		0	#NULL!	2	0	0	2010-02-01	89	W	0	0	2010-02-01	2010-02-01	false	Premolars	0.591389	Trep1	W	Premolar
46	13	2002-12-17	Group1	2003-02-17	2003-02-17	0	#NULL!	#NULL!	0	0		extracted	2005-09-20	0	0	0	2016-07-05	53	W	3	1	2005-09-20	2005-09-20	true	Anterior	2.75981	Trep1	W	Anterior
46	11	2012-01-10	Group 3	2012-01-10	2012-02-16	2	#NULL!	#NULL!	0	0		0	#NULL!	1	0	11	2016-07-05	62	W	0	0	2016-07-05	2016-07-05	false	Anterior	4.4847	Trep1	W	Anterior
47	14	2006-05-17	Group1	2006-05-17	2006-09-18	3	#NULL!	#NULL!	0	0		extracted	2007-01-30	0	0	0	2016-06-20	58	W	3	1	2007-01-30	2007-01-30	false	Premolars	0.706381	Trep1	W	Premolar
47	32	2013-01-22	Group 3	2013-01-22	2013-02-25	1	#NULL!	#NULL!	0	0		extracted	2013-10-28	1	0	6	2016-06-20	65	W	3	1	2013-10-28	2013-10-28	false	Anterior	0.763877	VitE	W	Anterior
48	33	2000-06-28	Group1	2000-06-28	2000-06-28	0	#NULL!	#NULL!	0	0		extracted	2012-02-28	0	0	0	2016-07-28	66	W	3	1	2012-02-28	2012-02-28	true	Anterior	11.669	VitE	W	Anterior
49	22	2004-09-02	Group1	2004-09-02	2004-09-07	1	#NULL!	#NULL!	0	0		0	#NULL!	0	0	0	2006-10-10	51	M	0	0	2006-10-10	2006-10-10	false	Anterior	2.10272	VitE	M	Anterior
50	35	2007-12-18	Group1	2007-12-18	2008-01-15	1	2012-04-24	2	retreatment	0		0	#NULL!	0	0	3	2013-06-26	70	W	1	1	2013-06-26	2012-04-24	false	Premolars	4.35054	Trep1	W	Premolar
50	26	2010-07-26	Group 2	2010-07-26	2010-08-27	1	#NULL!	#NULL!	0	0		extracted	2010-11-30	1	0	3	2013-06-26	73	W	3	1	2010-11-30	2010-11-30	false	Molars	0.347715	Trep1	W	Molar
51	36	2001-03-14	Group1	2001-03-14	2001-05-17	2	#NULL!	#NULL!	0	0		0	#NULL!	0	0	0	2006-08-10	27	M	0	0	2006-08-10	2006-08-10	false	Molars	5.40737	VitE	M	Molar
51	35	2006-06-07	Group1	2006-06-07	2006-07-10	2	#NULL!	#NULL!	0	0		0	#NULL!	1	0	0	2006-08-10	32	M	0	0	2006-08-10	2006-08-10	false	Premolars	0.175226	Trep1	M	Premolar
52	24	2014-10-17	Group 3	2014-10-17	2015-01-19	2	#NULL!	#NULL!	0	0		0	#NULL!	0	0	2	2016-05-11	42	W	0	0	2016-05-11	2016-05-11	false	Premolars	1.56608	VitE	W	Premolar
53	15	2004-02-09	Group1	2004-02-09	2004-02-16	1	#NULL!	#NULL!	0	0		0	#NULL!	0	0	0	2005-02-05	27	M	0	0	2005-02-05	2005-02-05	false	Premolars	0.991124	VitE	M	Premolar
54	44	2007-03-08	Group1	2007-03-08	2007-04-10	1	#NULL!	#NULL!	0	0		0	#NULL!	1	0	0	2008-03-12	72	M	0	0	2008-03-12	2008-03-12	false	Premolars	1.01303	Trep1	M	Premolar
54	35	2007-03-15	Group1	2007-03-15	2007-04-18	1	#NULL!	#NULL!	0	0		0	#NULL!	2	0	0	2008-03-12	72	M	0	0	2008-03-12	2008-03-12	false	Premolars	0.993862	Trep1	M	Premolar
55	33	2013-08-08	Group 3	2013-08-08	2013-08-15	1	#NULL!	#NULL!	0	0		0	#NULL!	0	0	0	2015-12-22	61	M	0	0	2015-12-22	2015-12-22	false	Anterior	2.37103	Trep1	M	Anterior
55	45	2013-08-29	Group 3	2013-08-29	2013-12-09	1	#NULL!	#NULL!	0	0		0	#NULL!	1	0	0	2015-12-22	61	M	0	0	2015-12-22	2015-12-22	false	Premolars	2.31353	VitE	M	Premolar
56	26	2010-10-05	Group 2	2010-10-05	2010-10-20	1	#NULL!	#NULL!	0	0		0	#NULL!	0	0	2	2016-09-13	51	W	0	0	2016-09-13	2016-09-13	false	Molars	5.94127	Trep1	W	Molar
56	45	2013-08-29	Group 3	2013-08-29	2013-09-03	1	#NULL!	#NULL!	0	0		0	#NULL!	1	0	1	2016-09-13	54	W	0	0	2016-09-13	2016-09-13	false	Premolars	3.04182	VitE	W	Premolar
57	45	2006-10-05	Group1	2006-10-05	2006-10-05	0	#NULL!	#NULL!	0	0		extracted	2009-07-28	0	0	0	2016-09-15	65	M	3	1	2009-07-28	2009-07-28	true	Premolars	2.81183	Trep1	M	Premolar
58	27	2003-11-13	Group1	2003-11-13	2004-03-02	6	#NULL!	#NULL!	0	0		extracted	2011-03-21	0	0	0	2016-06-29	49	W	3	1	2011-03-21	2011-03-21	false	Molars	7.35129	Trep1	W	Molar
58	16	2009-08-26	Group 2	2009-08-26	2009-09-16	1	#NULL!	#NULL!	0	0		0	#NULL!	1	0	3	2016-06-29	55	W	0	0	2016-06-29	2016-06-29	false	Molars	6.84204	VitE	W	Molar
58	15	2013-02-27	Group 3	2013-02-27	2013-03-12	1	#NULL!	#NULL!	0	0		0	#NULL!	2	0	3	2016-06-29	58	W	0	0	2016-06-29	2016-06-29	false	Premolars	3.33478	VitE	W	Premolar
58	25	2015-12-15	Group 3	2015-12-15	2016-01-26	1	#NULL!	#NULL!	0	0		0	#NULL!	3	0	0	2016-06-29	61	W	0	0	2016-06-29	2016-06-29	false	Premolars	0.539368	Trep1	W	Premolar
59	44	2007-02-06	Group1	2007-02-06	2007-02-07	1	#NULL!	#NULL!	0	0		0	#NULL!	0	0	0	2011-04-18	67	W	0	0	2011-04-18	2011-04-18	false	Premolars	4.19448	VitE	W	Premolar
59	35	2007-04-24	Group1	2007-04-24	2007-05-10	1	#NULL!	#NULL!	0	0		0	#NULL!	1	0	0	2011-04-18	67	W	0	0	2011-04-18	2011-04-18	false	Premolars	3.98366	Trep1	W	Premolar
60	27	2007-05-24	Group1	2007-05-24	2007-06-21	1	#NULL!	#NULL!	0	0		0	#NULL!	0	0	5	2016-03-08	50	W	0	0	2016-03-08	2016-03-08	false	Molars	8.79143	Trep1	W	Molar
60	46	2008-03-27	Group1	2008-03-27	2008-03-27	0	#NULL!	#NULL!	0	0		0	#NULL!	1	0	5	2016-03-08	51	W	0	0	2016-03-08	2016-03-08	true	Molars	7.94815	VitE	W	Molar
61	36	2000-01-26	Group1	2000-01-26	2000-01-26	0	2006-04-03	2	0	root end surgery	WR	extracted	2010-10-19	0	0	5	2016-07-11	39	W	3	1	2010-10-19	2006-04-03	true	Molars	6.18494	VitE	W	Molar
61	15	2002-03-05	Group1	2002-03-05	2002-06-13	4	#NULL!	#NULL!	0	0		0	#NULL!	1	0	5	2016-07-11	41	W	0	0	2016-07-11	2016-07-11	false	Premolars	14.3521	Trep1	W	Premolar
61	46	2006-04-13	Group1	2006-04-13	2006-07-24	2	#NULL!	#NULL!	0	0		0	#NULL!	2	2	5	2016-07-11	45	W	0	0	2016-07-11	2016-07-11	false	Molars	10.2453	Trep1	W	Molar
62	23	2009-01-26	Group 2	2009-01-26	2009-05-12	2	#NULL!	#NULL!	0	0		extracted	2009-12-17	0	0	0	2015-10-26	82	W	3	1	2009-12-17	2009-12-17	false	Anterior	0.889821	Trep1	W	Anterior
63	33	2010-10-21	Group 2	2010-10-21	2010-11-17	1	#NULL!	#NULL!	0	0		0	#NULL!	0	0	0	2010-11-18	100	W	0	0	2010-11-18	2010-11-18	false	Anterior	0.0766615	VitE	W	Anterior
64	25	2001-12-07	Group1	2001-12-07	2002-02-05	4	#NULL!	#NULL!	0	0		extracted	2002-04-22	1	0	0	2003-10-07	50	M	3	1	2002-04-22	2002-04-22	false	Premolars	0.372356	VitE	M	Premolar
64	17	2002-07-30	Group1	2002-07-30	2002-11-19	3	2003-03-27	1	retreatment	0		0	#NULL!	2	0	0	2003-10-07	51	M	1	1	2003-10-07	2003-03-27	false	Molars	0.657099	VitE	M	Molar
64	26	2002-12-16	Group1	2002-12-16	2003-03-27	1	#NULL!	#NULL!	0	0		0	#NULL!	3	0	0	2003-10-07	51	M	0	0	2003-10-07	2003-10-07	false	Molars	0.807684	VitE	M	Molar
65	44	2001-10-11	Group1	2001-10-11	2001-10-30	1	#NULL!	#NULL!	0	0		extracted	2015-05-12	0	0	11	2016-04-12	47	M	3	1	2015-05-12	2015-05-12	false	Premolars	13.5828	Trep1	M	Premolar
65	11	2008-05-08	Group1	2008-05-08	2008-06-04	1	#NULL!	#NULL!	0	0		0	#NULL!	1	0	11	2016-04-12	53	M	0	0	2016-04-12	2016-04-12	false	Anterior	7.92899	VitE	M	Anterior
65	22	2009-03-19	Group1	2009-03-19	2009-03-19	0	2009-06-16	2	retreatment	0		0	#NULL!	2	0	11	2016-04-12	54	M	1	1	2016-04-12	2009-06-16	true	Anterior	0.243674	Trep1	M	Anterior
66	23	2008-04-22	Group1	2008-04-22	2008-04-22	0	#NULL!	#NULL!	0	0		extracted	2008-06-26	0	0	0	2009-12-22	74	M	3	1	2008-06-26	2008-06-26	true	Anterior	0.177964	Trep1	M	Anterior
67	36	1999-10-05	Group1	1999-10-05	1999-10-26	2	#NULL!	#NULL!	0	0		0	#NULL!	0	0	8	2016-06-24	47	W	0	0	2016-06-24	2016-06-24	false	Molars	16.7204	VitE	W	Molar
68	37	2011-02-23	Group 2	2011-02-23	2011-03-23	2	#NULL!	#NULL!	0	0		0	#NULL!	0	0	4	2016-08-09	71	W	0	0	2016-08-09	2016-08-09	false	Molars	5.45939	VitE	W	Molar
68	27	2013-08-01	Group 3	2013-08-01	2013-08-01	0	#NULL!	#NULL!	0	0		0	#NULL!	1	0	2	2016-08-09	74	W	0	0	2016-08-09	2016-08-09	true	Molars	3.02265	Trep1	W	Molar
68	22	2014-01-13	Group 3	2014-01-13	2014-01-28	1	#NULL!	#NULL!	0	0		0	#NULL!	2	0	1	2016-08-09	74	W	0	0	2016-08-09	2016-08-09	false	Anterior	2.5709	Trep1	W	Anterior
69	34	2002-08-21	Group1	2002-08-21	2003-06-11	2	#NULL!	#NULL!	0	0		extracted	2011-02-10	0	0	0	2016-06-16	47	W	3	1	2011-02-10	2011-02-10	false	Premolars	8.47383	Trep1	W	Premolar
69	21	2006-12-18	Group1	2006-12-18	2006-12-18	0	#NULL!	#NULL!	0	0		0	#NULL!	1	1	3	2016-06-16	51	W	0	0	2016-06-16	2016-06-16	true	Anterior	9.49507	Trep1	W	Anterior
69	44	2009-09-08	Group1	2009-09-08	2009-09-08	0	#NULL!	#NULL!	0	0		extracted	2011-02-10	2	0	0	2016-06-16	54	W	3	1	2011-02-10	2011-02-10	true	Premolars	1.42371	Trep1	W	Premolar
70	26	2000-07-18	Group1	2000-07-18	2000-07-18	0	#NULL!	#NULL!	0	0		0	#NULL!	0	0	0	2003-04-15	51	W	0	0	2003-04-15	2003-04-15	true	Molars	2.74065	Trep1	W	Molar
71	15	2002-11-05	Group1	2002-11-05	2002-11-19	1	#NULL!	#NULL!	0	0		0	#NULL!	0	0	0	2003-05-15	46	W	0	0	2003-05-15	2003-05-15	false	Premolars	0.522941	Trep1	W	Premolar
72	37	1999-01-22	Group1	1999-01-27	1999-02-17	1	#NULL!	#NULL!	0	0		0	#NULL!	0	0	5	2016-09-08	59	W	0	0	2016-09-08	2016-09-08	false	Molars	17.6294	Trep1	W	Molar
72	17	2000-07-24	Group1	2000-07-24	2000-08-07	1	#NULL!	#NULL!	0	0		0	#NULL!	1	0	5	2016-09-08	61	W	0	0	2016-09-08	2016-09-08	false	Molars	16.1263	Trep1	W	Molar
72	14	2008-08-05	Group1	2008-08-05	2008-08-05	0	#NULL!	#NULL!	0	0		0	#NULL!	3	0	5	2016-09-08	69	W	0	0	2016-09-08	2016-09-08	true	Premolars	8.09326	Trep1	W	Premolar
73	46	2000-11-07	Group1	2000-11-07	2001-10-25	6	#NULL!	#NULL!	0	0		extracted	2010-03-10	0	0	5	2016-09-02	57	W	3	1	2010-03-10	2010-03-10	false	Molars	9.33628	Trep1	W	Molar
74	13	1999-12-02	Group1	1999-12-02	1999-12-02	0	#NULL!	#NULL!	0	0		0	#NULL!	0	0	0	2016-03-07	46	W	0	0	2016-03-07	2016-03-07	true	Anterior	16.2632	VitE	W	Anterior
74	26	2012-01-17	Group 3	2012-01-17	2012-01-28	1	#NULL!	#NULL!	0	0		0	#NULL!	1	0	0	2016-03-07	58	W	0	0	2016-03-07	2016-03-07	false	Molars	4.13698	VitE	W	Molar
75	24	2011-05-05	Group 2	2011-05-05	2011-05-18	2	#NULL!	#NULL!	0	0		0	#NULL!	0	0	9	2016-06-29	44	M	0	0	2016-06-29	2016-06-29	false	Premolars	5.15275	VitE	M	Premolar
76	35	2011-08-08	Group 2	2011-08-08	2011-08-30	2	#NULL!	#NULL!	0	0		0	#NULL!	0	0	0	2012-03-29	73	M	0	0	2012-03-29	2012-03-29	false	Premolars	0.640671	Trep1	M	Premolar
76	34	2011-08-08	Group 2	2011-08-08	2011-08-30	2	#NULL!	#NULL!	0	0		0	#NULL!	0	0	0	2012-03-29	73	M	0	0	2012-03-29	2012-03-29	false	Premolars	0.640671	VitE	M	Premolar
76	45	2011-09-19	Group 2	2011-09-19	2011-10-26	2	#NULL!	#NULL!	0	0		0	#NULL!	2	0	0	2012-03-29	73	M	0	0	2012-03-29	2012-03-29	false	Premolars	0.525679	Trep1	M	Premolar
77	23	2000-06-15	Group1	2000-06-15	2000-06-15	0	#NULL!	#NULL!	0	0		extracted	2003-04-28	0	0	0	2003-10-21	72	W	3	1	2003-04-28	2003-04-28	true	Anterior	2.86659	Trep1	W	Anterior
78	46	2004-02-03	Group1	2004-02-03	2004-03-04	2	2008-11-20	9	0	root end surgery	WR	extracted	2010-12-16	0	0	6	2016-04-19	43	M	3	1	2010-12-16	2008-11-20	false	Molars	4.79682	VitE	M	Molar
78	26	2007-05-08	Group1	2007-05-08	2007-06-18	2	#NULL!	#NULL!	0	0		0	#NULL!	2	0	3	2016-04-19	46	M	0	0	2016-04-19	2016-04-19	false	Molars	8.95023	VitE	M	Molar
78	47	2009-12-22	Group 2	2009-12-22	2010-01-27	2	#NULL!	#NULL!	0	0		0	#NULL!	6	4	3	2016-04-19	49	M	0	0	2016-04-19	2016-04-19	false	Molars	6.32457	VitE	M	Molar
78	14	2010-12-15	Group 2	2010-12-15	2011-01-12	1	#NULL!	#NULL!	0	0		0	#NULL!	7	2	3	2016-04-19	50	M	0	0	2016-04-19	2016-04-19	false	Premolars	5.3444	VitE	M	Premolar
79	37	2001-07-04	Group1	2001-07-04	2001-08-28	4	#NULL!	#NULL!	0	0		extracted	2013-05-31	0	0	0	2014-05-27	38	W	3	1	2013-05-31	2013-05-31	false	Molars	11.9072	VitE	W	Molar
79	36	2001-10-17	Group1	2001-10-17	2001-11-13	2	#NULL!	#NULL!	0	0		0	#NULL!	1	0	0	2014-05-27	38	W	0	0	2014-05-27	2014-05-27	false	Molars	12.6081	VitE	W	Molar
79	25	2005-12-05	Group1	2005-12-05	2006-01-24	1	2008-08-25	3	0	root end surgery	WR	0	#NULL!	2	0	0	2014-05-27	42	W	2	1	2014-05-27	2008-08-25	false	Premolars	2.72148	Trep1	W	Premolar
80	25	2003-09-23	Group1	2003-09-23	2003-11-11	3	#NULL!	#NULL!	0	0		0	#NULL!	0	0	1	2016-09-13	42	M	0	0	2016-09-13	2016-09-13	false	Premolars	12.975	VitE	M	Premolar
80	35	2013-04-18	Group 3	2013-04-18	2013-05-27	2	#NULL!	#NULL!	0	0		0	#NULL!	1	0	0	2016-09-13	51	M	0	0	2016-09-13	2016-09-13	false	Premolars	3.40596	VitE	M	Premolar
80	16	2013-04-25	Group 3	2013-04-25	2013-04-25	0	#NULL!	#NULL!	0	0		0	#NULL!	2	0	0	2016-09-13	51	M	0	0	2016-09-13	2016-09-13	true	Molars	3.3868	Trep1	M	Molar
81	17	2004-01-28	Group1	2004-01-28	2004-02-16	1	#NULL!	#NULL!	0	0		extracted	2008-02-14	0	0	0	2016-07-12	52	W	3	1	2008-02-14	2008-02-14	false	Molars	4.04663	VitE	W	Molar
81	27	2010-03-19	Group1	2010-03-19	2011-02-08	2	#NULL!	#NULL!	0	0		0	#NULL!	1	0	0	2016-07-12	58	W	0	0	2016-07-12	2016-07-12	false	Molars	6.31636	VitE	W	Molar
82	15	2003-02-18	Group1	2003-02-18	2003-03-06	1	#NULL!	#NULL!	0	0		0	#NULL!	0	0	0	2003-09-22	38	M	0	0	2003-09-22	2003-09-22	false	Premolars	0.591389	VitE	M	Premolar
82	17	2003-04-29	Group1	2003-04-29	2003-05-22	2	#NULL!	#NULL!	0	0		0	#NULL!	1	0	0	2003-09-22	38	M	0	0	2003-09-22	2003-09-22	false	Molars	0.399735	VitE	M	Molar
83	15	2001-09-17	Group1	2001-09-17	2001-09-24	1	#NULL!	#NULL!	0	0		0	#NULL!	0	0	8	2016-07-14	38	W	0	0	2016-07-14	2016-07-14	false	Premolars	14.823	VitE	W	Premolar
83	25	2007-07-26	Group1	2007-07-26	2007-08-23	1	#NULL!	#NULL!	0	0		0	#NULL!	1	0	8	2016-07-14	44	W	0	0	2016-07-14	2016-07-14	false	Premolars	8.9694	VitE	W	Premolar
83	17	2015-01-27	Group 3	2015-01-27	2015-01-27	0	#NULL!	#NULL!	0	0		0	#NULL!	2	0	2	2016-07-14	52	W	0	0	2016-07-14	2016-07-14	true	Molars	1.46204	VitE	W	Molar
84	25	2005-02-10	Group1	2005-02-10	2005-03-01	1	#NULL!	#NULL!	0	0		extracted	2007-07-10	0	0	8	2016-07-25	68	W	3	1	2007-07-10	2007-07-10	false	Premolars	2.40936	VitE	W	Premolar
85	13	2011-03-07	Group 2	2011-03-07	2011-07-05	3	#NULL!	#NULL!	0	0		extracted	2015-12-08	0	0	0	2016-01-21	78	W	3	1	2015-12-08	2015-12-08	false	Anterior	4.75575	Trep1	W	Anterior
86	47	2013-06-26	Group 3	2013-06-26	2013-06-26	0	#NULL!	#NULL!	0	0		extracted	2013-06-30	0	0	4	2016-06-28	52	W	3	1	2013-06-30	2013-06-30	true	Molars	0.0109516	VitE	W	Molar
87	17	2014-03-27	Group 3	2014-03-27	2014-04-08	1	#NULL!	#NULL!	0	0		extracted	2015-04-21	0	0	4	2016-06-27	49	W	3	1	2015-04-21	2015-04-21	false	Molars	1.06779	VitE	W	Molar
88	17	2011-02-11	Group 2	2011-02-11	2011-05-09	3	#NULL!	#NULL!	0	0		0	#NULL!	1	0	7	2016-08-17	52	W	0	0	2016-08-17	2016-08-17	false	Molars	5.51415	VitE	W	Molar
88	11	2014-07-14	Group 3	2014-07-14	2014-07-29	1	#NULL!	#NULL!	0	0		0	#NULL!	2	0	3	2016-08-17	56	W	0	0	2016-08-17	2016-08-17	false	Anterior	2.0945	VitE	W	Anterior
89	17	2000-09-18	Group1	2000-09-18	2000-10-02	1	#NULL!	#NULL!	0	0		0	#NULL!	0	0	3	2016-02-04	49	W	0	0	2016-02-04	2016-02-04	false	Molars	15.3788	VitE	W	Molar
89	16	2012-09-27	Group 3	2012-09-27	2012-10-16	1	#NULL!	#NULL!	0	0		0	#NULL!	1	0	3	2016-02-04	62	W	0	0	2016-02-04	2016-02-04	false	Molars	3.35394	Trep1	W	Molar
90	36	2005-12-30	Group1	2006-01-19	2006-03-29	2	#NULL!	#NULL!	0	0		0	#NULL!	0	0	0	2010-02-17	22	M	0	0	2010-02-17	2010-02-17	false	Molars	4.13425	Trep1	M	Molar
91	26	2009-12-08	Group 2	2009-12-08	2010-01-11	2	2010-01-21	3	0	root end surgery	WR	0	#NULL!	0	0	0	2011-08-11	74	M	2	1	2011-08-11	2010-01-21	false	Molars	0.120468	Trep1	M	Molar
92	45	2001-01-18	Group1	2001-01-18	2001-03-29	1	#NULL!	#NULL!	0	0		0	#NULL!	0	0	0	2009-03-09	57	M	0	0	2009-03-09	2009-03-09	false	Premolars	8.13707	Trep1	M	Premolar
93	13	2000-12-14	Group1	2000-12-14	2001-06-13	2	#NULL!	#NULL!	0	0		0	#NULL!	0	0	0	2006-02-01	50	M	0	0	2006-02-01	2006-02-01	false	Anterior	5.13358	VitE	M	Anterior
93	46	2003-04-09	Group1	2003-04-09	2003-04-10	1	#NULL!	#NULL!	0	0		0	#NULL!	3	0	0	2006-02-01	53	M	0	0	2006-02-01	2006-02-01	false	Molars	2.81731	VitE	M	Molar
93	45	2003-04-09	Group1	2003-04-09	2003-04-10	1	#NULL!	#NULL!	0	0		0	#NULL!	3	0	0	2006-02-01	53	M	0	0	2006-02-01	2006-02-01	false	Premolars	2.81731	VitE	M	Premolar
94	27	2011-09-06	Group 2	2011-09-06	2011-09-21	1	#NULL!	#NULL!	0	0		0	#NULL!	0	0	1	2015-12-07	48	W	0	0	2015-12-07	2015-12-07	false	Molars	4.25198	VitE	W	Molar
95	46	1999-11-24	Group1	1999-11-24	2000-03-01	2	#NULL!	#NULL!	0	0		0	#NULL!	0	0	0	2014-11-25	62	W	0	0	2014-11-25	2014-11-25	false	Molars	15.0038	VitE	W	Molar
96	27	2005-12-21	Group1	2005-12-21	2006-02-08	2	#NULL!	#NULL!	0	0		0	#NULL!	0	0	0	2016-09-19	45	M	0	0	2016-09-19	2016-09-19	false	Molars	10.7463	VitE	M	Molar
96	17	2014-07-17	Group 3	2014-07-17	2014-08-26	2	#NULL!	#NULL!	0	0		0	#NULL!	1	0	0	2016-09-19	53	M	0	0	2016-09-19	2016-09-19	false	Molars	2.17664	VitE	M	Molar
97	34	2002-04-26	Group1	2002-04-26	2002-04-26	0	2002-05-22	2	retreatment	0		0	#NULL!	0	0	0	2004-05-11	62	M	1	1	2004-05-11	2002-05-22	true	Premolars	0.0711857	Trep1	M	Premolar
98	12	2002-08-14	Group1	2002-08-14	2005-11-28	5	#NULL!	#NULL!	0	0		0	#NULL!	0	0	0	2010-04-13	54	W	0	0	2010-04-13	2010-04-13	false	Anterior	7.66341	Trep1	W	Anterior
99	14	2000-04-06	Group1	2000-04-06	2000-04-06	0	#NULL!	#NULL!	0	0		extracted	2012-04-26	0	0	0	2016-01-18	74	M	3	1	2012-04-26	2012-04-26	true	Premolars	12.055	VitE	M	Premolar
99	11	2005-01-05	Group1	2005-01-05	2005-02-17	1	#NULL!	#NULL!	0	0		extracted	2010-05-20	1	0	0	2016-01-18	79	M	3	1	2010-05-20	2010-05-20	false	Anterior	5.36904	Trep1	M	Anterior
99	34	2007-04-17	Group1	2007-04-17	2007-04-17	0	#NULL!	#NULL!	0	0		0	#NULL!	2	0	6	2016-01-18	81	M	0	0	2016-01-18	2016-01-18	true	Premolars	8.75584	Trep1	M	Premolar
100	27	2003-01-16	Group1	2003-01-28	2003-02-26	2	#NULL!	#NULL!	0	0		0	#NULL!	0	0	0	2008-10-13	31	M	0	0	2008-10-13	2008-10-13	false	Molars	5.7414	Trep1	M	Molar
101	47	2003-12-03	Group1	2003-12-03	2004-04-01	3	#NULL!	#NULL!	0	0		extracted	2009-11-24	0	0	0	2016-05-18	63	M	3	1	2009-11-24	2009-11-24	false	Molars	5.97686	VitE	M	Molar
101	35	2011-01-24	Group 2	2011-01-24	2011-01-24	0	#NULL!	#NULL!	0	0		extracted	2015-10-07	1	0	0	2016-05-18	70	M	3	1	2015-10-07	2015-10-07	true	Premolars	4.70099	Trep1	M	Premolar
102	26	2013-04-10	Group 3	2013-04-10	2013-05-02	1	#NULL!	#NULL!	0	0		extracted	2014-01-09	0	0	2	2016-09-05	54	M	3	1	2014-01-09	2014-01-09	false	Molars	0.750188	Trep1	M	Molar
102	13	2015-12-03	Group 3	2015-12-03	2015-12-21	1	#NULL!	#NULL!	0	0		0	#NULL!	1	0	0	2016-09-05	57	M	0	0	2016-09-05	2016-09-05	false	Anterior	0.758401	Trep1	M	Anterior
103	37	2004-12-13	Group1	2004-12-13	2005-04-06	2	#NULL!	#NULL!	0	0		0	#NULL!	0	0	0	2007-12-17	52	W	0	0	2007-12-17	2007-12-17	false	Molars	3.00896	VitE	W	Molar
103	47	2006-08-16	Group1	2006-08-16	2006-08-16	0	2006-08-23	1	retreatment	0		0	#NULL!	1	0	0	2007-12-17	53	W	1	1	2007-12-17	2006-08-23	true	Molars	0.0191654	VitE	W	Molar
104	37	2001-08-06	Group1	2001-08-06	2001-08-06	0	2007-07-12	1	0	root end surgery	WR	0	#NULL!	1	0	8	2016-09-26	51	M	2	1	2016-09-26	2007-07-12	true	Molars	5.93031	VitE	M	Molar
104	36	2001-10-22	Group1	2001-10-22	2001-11-14	1	#NULL!	#NULL!	0	0		extracted	2010-08-11	2	0	9	2016-09-26	51	M	3	1	2010-08-11	2010-08-11	false	Molars	8.80238	Trep1	M	Molar
104	25	2003-12-22	Group1	2003-12-22	2004-02-18	1	2004-07-23	2	0	root end surgery	WR	extracted	2004-11-05	3	0	8	2016-09-26	53	M	3	1	2004-11-05	2004-07-23	false	Premolars	0.585913	Trep1	M	Premolar
105	37	2001-02-15	Group1	2001-02-15	2001-03-12	1	#NULL!	#NULL!	0	0		extracted	2011-03-21	0	0	0	2011-09-09	55	W	3	1	2011-03-21	2011-03-21	false	Molars	10.0919	VitE	W	Molar
105	41	2002-12-17	Group1	2002-12-17	2004-10-21	3	#NULL!	#NULL!	0	0		0	#NULL!	1	0	0	2011-09-09	57	W	0	0	2011-09-09	2011-09-09	false	Anterior	8.72846	Trep1	W	Anterior
105	43	2003-01-16	Group1	2003-01-16	2004-07-15	12	#NULL!	#NULL!	0	0		0	#NULL!	2	0	0	2011-09-09	57	W	0	0	2011-09-09	2011-09-09	false	Anterior	8.64632	Trep1	W	Anterior
106	33	2010-06-15	Group1	2010-06-15	2010-06-29	1	#NULL!	#NULL!	0	0		0	#NULL!	0	0	0	2014-02-26	49	W	0	0	2014-02-26	2014-02-26	false	Anterior	3.70166	VitE	W	Anterior
107	36	2009-10-23	Group 2	2009-10-23	2010-01-11	2	#NULL!	#NULL!	0	0		0	#NULL!	0	0	2	2012-10-22	56	M	0	0	2012-10-22	2012-10-22	false	Molars	2.99801	VitE	M	Molar
108	37	2004-10-05	Group1	2004-10-05	2004-10-19	1	#NULL!	#NULL!	0	0		0	#NULL!	0	0	0	2011-12-22	65	M	0	0	2011-12-22	2011-12-22	false	Molars	7.21166	VitE	M	Molar
109	31	2002-02-13	Group1	2002-02-13	2002-02-25	1	#NULL!	#NULL!	0	0		extracted	2010-02-22	0	0	0	2011-09-20	78	M	3	1	2010-02-22	2010-02-22	false	Anterior	8.02482	VitE	M	Anterior
110	15	2014-09-18	Group 3	2014-09-18	2014-10-02	1	#NULL!	#NULL!	0	0		extracted	2016-06-09	0	0	2	2016-09-15	64	M	3	1	2016-06-09	2016-06-09	false	Premolars	1.72488	Trep1	M	Premolar
111	45	2001-02-06	Group1	2001-02-06	2001-03-05	2	#NULL!	#NULL!	0	0		0	#NULL!	0	0	0	2005-11-15	58	M	0	0	2005-11-15	2005-11-15	false	Premolars	4.77218	VitE	M	Premolar
112	45	2004-10-01	Group1	2005-03-30	2005-03-30	2	#NULL!	#NULL!	0	0		0	#NULL!	0	0	16	2016-07-21	40	W	0	0	2016-07-21	2016-07-21	true	Premolars	11.8031	VitE	W	Premolar
112	14	2007-04-20	Group1	2007-04-20	2007-04-26	1	#NULL!	#NULL!	0	0		0	#NULL!	4	0	8	2016-07-21	43	W	0	0	2016-07-21	2016-07-21	false	Premolars	9.25414	Trep1	W	Premolar
112	15	2015-11-02	Group 3	2015-11-05	2015-12-15	2	#NULL!	#NULL!	0	0		0	#NULL!	5	0	2	2016-07-21	52	W	0	0	2016-07-21	2016-07-21	false	Premolars	0.717333	VitE	W	Premolar
113	35	2011-12-01	Group 3	2011-12-01	2012-01-09	1	#NULL!	#NULL!	0	0		0	#NULL!	2	0	0	2013-03-11	70	M	0	0	2013-03-11	2013-03-11	false	Premolars	1.27587	Trep1	M	Premolar
114	35	2003-10-23	Group1	2003-10-23	2003-11-20	2	#NULL!	#NULL!	0	0		0	#NULL!	0	0	0	2005-02-15	61	W	0	0	2005-02-15	2005-02-15	false	Premolars	1.31694	VitE	W	Premolar
114	36	2004-09-29	Group1	2004-09-29	2004-10-26	2	#NULL!	#NULL!	0	0		0	#NULL!	1	0	0	2005-02-15	62	W	0	0	2005-02-15	2005-02-15	false	Molars	0.38057	VitE	W	Molar
115	14	2000-11-14	Group1	2000-11-14	2001-01-16	2	#NULL!	#NULL!	0	0		extracted	2016-06-15	0	0	9	2016-08-09	62	W	3	1	2016-06-15	2016-06-15	false	Premolars	15.5842	Trep1	W	Premolar
115	17	2002-03-18	Group1	2002-03-18	2002-05-06	2	#NULL!	#NULL!	0	0		0	#NULL!	2	0	9	2016-08-09	63	W	0	0	2016-08-09	2016-08-09	false	Molars	14.3959	Trep1	W	Molar
115	45	2003-03-12	Group1	2003-03-12	2003-03-12	0	2007-08-15	1	0	root end surgery	WR	extracted	2008-01-24	3	0	9	2016-08-09	64	W	3	1	2008-01-24	2007-08-15	true	Premolars	4.4272	Trep1	W	Premolar
115	23	2006-01-16	Group1	2006-01-16	2006-03-06	1	#NULL!	#NULL!	0	0		0	#NULL!	4	0	9	2016-08-09	67	W	0	0	2016-08-09	2016-08-09	false	Anterior	10.5629	Trep1	W	Anterior
115	35	2008-11-24	Group 2	2008-11-24	2009-01-19	2	2016-01-14	2	retreatment	0		0	#NULL!	5	0	9	2016-08-09	70	W	1	1	2016-08-09	2016-01-14	false	Premolars	7.13773	VitE	W	Premolar
116	27	2003-04-10	Group1	2003-04-10	2003-04-24	1	#NULL!	#NULL!	0	0		0	#NULL!	0	0	0	2011-09-07	53	W	0	0	2011-09-07	2011-09-07	false	Molars	8.41086	Trep1	W	Molar
116	23	2009-12-30	Group1	2009-12-30	2010-01-28	2	#NULL!	#NULL!	0	0		0	#NULL!	1	0	0	2011-09-07	60	W	0	0	2011-09-07	2011-09-07	false	Anterior	1.68655	Trep1	W	Anterior
117	37	2005-04-13	Group1	2005-04-13	2005-04-13	0	2005-07-04	2	retreatment	0		extracted	2015-02-11	0	0	0	2015-02-19	29	M	3	1	2015-02-11	2005-07-04	true	Molars	0.224509	VitE	M	Molar
117	16	2007-09-12	Group1	2007-09-12	2007-10-15	2	2014-07-02	3	retreatment	0		0	#NULL!	2	0	0	2015-02-19	31	M	1	1	2015-02-19	2014-07-02	false	Molars	6.80371	Trep1	M	Molar
118	14	2004-09-30	Group1	2004-09-30	2004-10-27	2	#NULL!	#NULL!	0	0		extracted	2008-05-07	0	0	0	2015-11-09	37	M	3	1	2008-05-07	2008-05-07	false	Premolars	3.60035	VitE	M	Premolar
118	46	2014-02-26	Group 3	2014-03-17	2014-03-17	1	#NULL!	#NULL!	0	0		0	#NULL!	1	0	0	2015-11-09	46	M	0	0	2015-11-09	2015-11-09	true	Molars	1.70024	Trep1	M	Molar
119	15	2002-10-18	Group1	2002-10-18	2002-12-19	2	#NULL!	#NULL!	0	0		0	#NULL!	0	0	0	2014-04-22	43	M	0	0	2014-04-22	2014-04-22	false	Premolars	11.5102	Trep1	M	Premolar
120	23	2007-05-30	Group1	2007-05-30	2007-06-19	1	#NULL!	#NULL!	0	0		0	#NULL!	0	0	4	2015-10-29	82	W	0	0	2015-10-29	2015-10-29	false	Anterior	8.41634	Trep1	W	Anterior
121	34	2002-07-09	Group1	2002-07-09	2002-07-23	2	#NULL!	#NULL!	0	0		0	#NULL!	1	0	0	2008-08-05	78	W	0	0	2008-08-05	2008-08-05	false	Premolars	6.07542	Trep1	W	Premolar
121	23	2003-07-10	Group1	2003-07-10	2003-08-28	2	#NULL!	#NULL!	0	0		extracted	2005-12-29	3	0	0	2008-08-05	79	W	3	1	2005-12-29	2005-12-29	false	Anterior	2.47233	VitE	W	Anterior
122	24	2003-05-09	Group1	2003-05-09	2003-08-27	5	#NULL!	#NULL!	0	0		0	#NULL!	0	0	0	2008-11-19	60	W	0	0	2008-11-19	2008-11-19	false	Premolars	5.53332	VitE	W	Premolar
123	45	2001-11-14	Group1	2001-11-14	2001-11-20	1	#NULL!	#NULL!	0	0		0	#NULL!	0	0	7	2015-11-11	56	W	0	0	2015-11-11	2015-11-11	false	Premolars	13.9907	VitE	W	Premolar
124	24	2008-03-11	Group1	2008-03-11	2008-04-09	2	#NULL!	#NULL!	0	0		0	#NULL!	0	0	2	2016-02-15	67	M	0	0	2016-02-15	2016-02-15	false	Premolars	7.93173	VitE	M	Premolar
125	46	1999-12-16	Group1	1999-12-16	2000-02-07	1	#NULL!	#NULL!	0	0		extracted	2005-07-22	0	0	0	2009-10-20	72	W	3	1	2005-07-22	2005-07-22	false	Molars	5.59903	VitE	W	Molar
126	15	2016-03-08	Group 3	2016-03-08	2016-04-12	1	#NULL!	#NULL!	0	0		0	#NULL!	0	0	1	2016-06-30	64	W	0	0	2016-06-30	2016-06-30	false	Premolars	0.312122	Trep1	W	Premolar
127	22	2006-11-27	Group1	2006-11-27	2007-03-15	2	#NULL!	#NULL!	0	0		0	#NULL!	0	0	1	2012-08-27	46	W	0	0	2012-08-27	2012-08-27	false	Anterior	5.74961	Trep1	W	Anterior
128	16	2006-09-12	Group1	2006-09-12	2006-11-30	2	#NULL!	#NULL!	0	0		extracted	2007-02-14	0	0	0	2016-04-30	38	M	3	1	2007-02-14	2007-02-14	false	Molars	0.424376	Trep1	M	Molar
129	12	2011-05-04	Group 2	2011-05-04	2011-05-24	1	#NULL!	#NULL!	0	0		0	#NULL!	0	0	1	2012-02-06	72	M	0	0	2012-02-06	2012-02-06	false	Anterior	0.761139	VitE	M	Anterior
129	11	2011-05-04	Group 2	2011-05-04	2011-05-24	1	#NULL!	#NULL!	0	0		0	#NULL!	0	0	1	2012-02-06	72	M	0	0	2012-02-06	2012-02-06	false	Anterior	0.761139	VitE	M	Anterior
130	45	2004-07-20	Group1	2004-07-20	2004-08-10	2	#NULL!	#NULL!	0	0		0	#NULL!	0	0	0	2009-05-13	61	M	0	0	2009-05-13	2009-05-13	false	Premolars	4.81325	Trep1	M	Premolar
131	47	2015-12-01	Group 3	2015-12-01	2015-12-09	1	#NULL!	#NULL!	0	0		0	#NULL!	0	0	0	2016-07-25	56	M	0	0	2016-07-25	2016-07-25	false	Molars	0.648885	VitE	M	Molar
132	15	2015-02-25	Group 3	2015-02-25	2015-02-25	0	#NULL!	#NULL!	0	0		0	#NULL!	0	0	3	2016-08-29	68	W	0	0	2016-08-29	2016-08-29	true	Premolars	1.50859	Trep1	W	Premolar
133	46	2004-04-20	Group1	2004-04-20	2004-04-20	0	#NULL!	#NULL!	0	0		0	#NULL!	0	0	0	2016-01-04	61	M	0	0	2016-01-04	2016-01-04	true	Molars	11.7073	VitE	M	Molar
133	34	2004-06-17	Group1	2004-06-17	2004-07-21	1	#NULL!	#NULL!	0	0		0	#NULL!	1	0	0	2016-01-04	61	M	0	0	2016-01-04	2016-01-04	false	Premolars	11.5485	Trep1	M	Premolar
133	37	2004-10-13	Group1	2004-10-13	2004-10-26	1	#NULL!	#NULL!	0	0		0	#NULL!	2	0	0	2016-01-04	61	M	0	0	2016-01-04	2016-01-04	false	Molars	11.2254	VitE	M	Molar
133	45	2007-08-15	Group1	2007-08-15	2007-08-30	2	#NULL!	#NULL!	0	0		0	#NULL!	3	0	0	2016-01-04	64	M	0	0	2016-01-04	2016-01-04	false	Premolars	8.38896	VitE	M	Premolar
133	44	2007-08-15	Group1	2007-08-15	2007-08-30	2	#NULL!	#NULL!	0	0		0	#NULL!	3	0	0	2016-01-04	64	M	0	0	2016-01-04	2016-01-04	false	Premolars	8.38896	VitE	M	Premolar
133	27	2007-08-21	Group1	2007-08-21	2007-11-28	3	#NULL!	#NULL!	0	0		0	#NULL!	5	0	0	2016-01-04	64	M	0	0	2016-01-04	2016-01-04	false	Molars	8.37253	VitE	M	Molar
133	23	2007-08-23	Group1	2007-08-23	2007-12-10	1	#NULL!	#NULL!	0	0		extracted	2012-09-06	6	0	0	2016-01-04	64	M	3	1	2012-09-06	2012-09-06	false	Anterior	5.04049	Trep1	M	Anterior
133	24	2007-10-10	Group1	2007-10-10	2007-11-05	1	#NULL!	#NULL!	0	0		0	#NULL!	7	0	0	2016-01-04	64	M	0	0	2016-01-04	2016-01-04	false	Premolars	8.23564	Trep1	M	Premolar
134	15	2009-12-08	Group 2	2009-12-08	2010-01-21	3	#NULL!	#NULL!	0	0		0	#NULL!	0	0	2	2013-04-15	51	W	0	0	2013-04-15	2013-04-15	false	Premolars	3.3512	VitE	W	Premolar
135	15	2001-10-01	Group1	2001-10-01	2001-11-14	2	#NULL!	#NULL!	0	0		0	#NULL!	0	0	1	2014-01-07	69	W	0	0	2014-01-07	2014-01-07	false	Premolars	12.2686	Trep1	W	Premolar
136	16	2000-12-20	Group1	2000-12-20	2001-01-16	1	2001-11-09	1	0	root end surgery	WR	0	#NULL!	0	0	7	2016-06-23	40	W	2	1	2016-06-23	2001-11-09	false	Molars	0.887083	VitE	W	Molar
136	36	2003-06-02	Group1	2003-06-02	2003-06-02	0	2012-11-06	5	retreatment	0		extracted	2013-04-11	1	1	11	2016-06-23	42	W	3	1	2013-04-11	2012-11-06	true	Molars	9.4321	VitE	W	Molar
137	17	1999-10-28	Group1	1999-10-28	1999-10-28	0	#NULL!	#NULL!	0	0		extracted	2001-10-25	0	0	0	2010-12-09	77	M	3	1	2001-10-25	2001-10-25	true	Molars	1.9932	VitE	M	Molar
137	12	2003-03-19	Group1	2003-03-19	2003-03-19	0	#NULL!	#NULL!	0	0		extracted	2005-12-19	1	0	0	2010-12-09	81	M	3	1	2005-12-19	2005-12-19	true	Anterior	2.75434	Trep1	M	Anterior
137	11	2003-03-26	Group1	2003-03-26	2003-03-26	0	#NULL!	#NULL!	0	0		extracted	2009-01-22	2	0	0	2010-12-09	81	M	3	1	2009-01-22	2009-01-22	true	Anterior	5.82901	Trep1	M	Anterior
137	21	2008-04-08	Group1	2008-04-08	2008-05-08	1	#NULL!	#NULL!	0	0		extracted	2009-01-22	3	0	0	2010-12-09	86	M	3	1	2009-01-22	2009-01-22	false	Anterior	0.791256	VitE	M	Anterior
138	27	2000-05-10	Group1	2000-05-10	2000-09-21	8	#NULL!	#NULL!	0	0		extracted	2003-02-10	0	0	0	2016-08-23	46	W	3	1	2003-02-10	2003-02-10	false	Molars	2.75434	VitE	W	Molar
138	17	2001-08-29	Group1	2001-08-29	2001-10-10	3	2001-10-29	1	0	root end surgery	WR	extracted	2016-02-16	1	0	1	2016-08-23	47	W	3	1	2016-02-16	2001-10-29	false	Molars	0.167013	VitE	W	Molar
138	24	2005-07-06	Group1	2005-07-06	2005-10-13	3	#NULL!	#NULL!	0	0		0	#NULL!	2	2	1	2016-08-23	51	W	0	0	2016-08-23	2016-08-23	false	Premolars	11.1323	Trep1	W	Premolar
138	23	2005-08-30	Group1	2005-08-30	2005-09-29	2	#NULL!	#NULL!	0	0		0	#NULL!	3	2	1	2016-08-23	51	W	0	0	2016-08-23	2016-08-23	false	Anterior	10.9818	VitE	W	Anterior
139	16	2007-05-23	Group1	2007-05-23	2007-06-06	1	#NULL!	#NULL!	0	0		0	#NULL!	0	0	3	2014-10-13	60	W	0	0	2014-10-13	2014-10-13	false	Molars	7.39236	VitE	W	Molar
139	33	2012-11-20	Group 3	2012-11-20	2012-12-11	1	#NULL!	#NULL!	0	0		0	#NULL!	1	0	3	2014-10-13	66	W	0	0	2014-10-13	2014-10-13	false	Anterior	1.89463	Trep1	W	Anterior
140	43	2000-08-23	Group1	2000-08-23	2000-08-23	0	#NULL!	#NULL!	0	0		0	#NULL!	0	0	0	2005-05-20	65	M	0	0	2005-05-20	2005-05-20	true	Anterior	4.73932	VitE	M	Anterior
141	44	2000-01-10	Group1	2000-01-10	2000-01-24	1	#NULL!	#NULL!	0	0		0	#NULL!	0	0	0	2015-11-03	48	M	0	0	2015-11-03	2015-11-03	false	Premolars	15.8142	Trep1	M	Premolar
141	13	2002-01-10	Group1	2002-01-10	2002-01-24	2	#NULL!	#NULL!	0	0		0	#NULL!	1	0	0	2015-11-03	50	M	0	0	2015-11-03	2015-11-03	false	Anterior	13.8128	Trep1	M	Anterior
142	41	2011-07-21	Group 2	2011-07-21	2011-07-21	0	#NULL!	#NULL!	0	0		0	#NULL!	0	0	1	2012-05-04	88	W	0	0	2012-05-04	2012-05-04	true	Anterior	0.788518	VitE	W	Anterior
143	16	2004-08-04	Group1	2004-08-04	2004-10-19	2	#NULL!	#NULL!	0	0		extracted	2007-06-05	0	0	0	2016-05-31	76	M	3	1	2007-06-05	2007-06-05	false	Molars	2.83374	VitE	M	Molar
143	36	2004-09-09	Group1	2004-09-09	2004-10-19	1	#NULL!	#NULL!	0	0		extracted	2005-04-28	1	0	0	2016-05-31	76	M	3	1	2005-04-28	2005-04-28	false	Molars	0.632457	Trep1	M	Molar
144	21	2011-03-16	Group 2	2011-03-16	2011-05-19	2	#NULL!	#NULL!	0	0		0	#NULL!	0	0	4	2016-09-21	55	W	0	0	2016-09-21	2016-09-21	false	Anterior	5.51963	Trep1	W	Anterior
144	11	2015-03-26	Group 3	2015-03-26	2015-05-07	1	#NULL!	#NULL!	0	0		0	#NULL!	1	0	1	2016-09-21	59	W	0	0	2016-09-21	2016-09-21	false	Anterior	1.49216	VitE	W	Anterior
145	26	2010-01-13	Group1	2010-01-13	2010-03-10	1	#NULL!	#NULL!	0	0		0	#NULL!	0	0	10	2016-04-14	57	W	0	0	2016-04-14	2016-04-14	false	Molars	6.25065	Trep1	W	Molar
145	27	2015-09-21	Group 3	2015-09-21	2015-09-21	0	#NULL!	#NULL!	0	0		0	#NULL!	1	0	1	2016-04-14	62	W	0	0	2016-04-14	2016-04-14	true	Molars	0.56401	VitE	W	Molar
146	26	2011-02-14	Group 2	2011-02-14	2011-03-09	2	#NULL!	#NULL!	0	0		0	#NULL!	1	0	2	2016-05-18	69	M	0	0	2016-05-18	2016-05-18	false	Molars	5.25679	Trep1	M	Molar
147	25	2003-01-22	Group1	2003-01-22	2003-03-19	2	#NULL!	#NULL!	0	0		extracted	2015-10-20	0	0	3	2016-06-28	36	M	3	1	2015-10-20	2015-10-20	false	Premolars	12.7422	Trep1	M	Premolar
147	46	2009-02-05	Group 2	2009-02-05	2009-04-02	2	#NULL!	#NULL!	0	0		extracted	2010-12-21	1	0	3	2016-06-28	42	M	3	1	2010-12-21	2010-12-21	false	Molars	1.87273	Trep1	M	Molar
148	43	2006-12-07	Group1	2006-12-07	2006-12-18	0	#NULL!	#NULL!	0	0		0	#NULL!	0	0	0	2012-08-06	81	W	0	0	2012-08-06	2012-08-06	false	Anterior	5.66474	Trep1	W	Anterior
149	27	2012-04-16	Group 3	2012-04-16	2012-07-02	2	#NULL!	#NULL!	0	0		0	#NULL!	2	0	0	2016-05-02	54	M	0	0	2016-05-02	2016-05-02	false	Molars	4.04389	VitE	M	Molar
150	13	1999-07-22	Group1	1999-07-22	1999-11-04	2	#NULL!	#NULL!	0	0		extracted	2007-10-30	0	0	0	2007-10-30	46	M	3	1	2007-10-30	2007-10-30	false	Anterior	8.27397	Trep1	M	Anterior
151	35	2004-12-09	Group1	2004-12-09	2004-12-09	0	#NULL!	#NULL!	0	0		extracted	2010-11-25	0	0	8	2016-08-01	55	W	3	1	2010-11-25	2010-11-25	true	Premolars	5.96043	VitE	W	Premolar
151	34	2011-03-16	Group 2	2011-03-16	2011-06-15	3	#NULL!	#NULL!	0	0		0	#NULL!	1	0	8	2016-08-01	61	W	0	0	2016-08-01	2016-08-01	false	Premolars	5.37999	Trep1	W	Premolar
151	17	2016-06-16	Group 3	2016-06-16	2016-07-26	1	#NULL!	#NULL!	0	0		0	#NULL!	2	0	1	2016-08-01	66	W	0	0	2016-08-01	2016-08-01	false	Molars	0.125944	VitE	W	Molar
152	47	2010-09-22	Group 2	2010-09-22	2010-10-27	1	#NULL!	#NULL!	0	0		extracted	2014-09-29	0	0	6	2016-05-20	71	W	3	1	2014-09-29	2014-09-29	false	Molars	4.01925	Trep1	W	Molar
152	25	2011-07-28	Group 2	2011-07-28	2011-08-24	2	#NULL!	#NULL!	0	0		0	#NULL!	1	0	6	2016-05-20	72	W	0	0	2016-05-20	2016-05-20	false	Premolars	4.81325	Trep1	W	Premolar
152	37	2012-05-14	Group 3	2012-05-14	2012-05-14	0	#NULL!	#NULL!	0	0		0	#NULL!	2	0	5	2016-05-20	73	W	0	0	2016-05-20	2016-05-20	true	Molars	4.01652	Trep1	W	Molar
153	17	2005-05-18	Group1	2005-05-18	2005-05-30	1	#NULL!	#NULL!	0	0		0	#NULL!	0	0	2	2016-03-07	60	M	0	0	2016-03-07	2016-03-07	false	Molars	10.8038	VitE	M	Molar
154	44	2001-04-30	Group1	2001-04-30	2001-04-30	0	#NULL!	#NULL!	0	0		0	#NULL!	0	0	0	2004-05-03	79	W	0	0	2004-05-03	2004-05-03	true	Premolars	3.00896	Trep1	W	Premolar
154	13	2001-06-18	Group1	2001-06-18	2001-06-18	0	#NULL!	#NULL!	0	0		extracted	2003-06-16	1	0	0	2004-05-03	79	W	3	1	2003-06-16	2003-06-16	true	Anterior	1.9932	VitE	W	Anterior
155	45	2006-08-21	Group1	2006-08-21	2006-09-07	1	#NULL!	#NULL!	0	0		0	#NULL!	0	0	0	2014-04-07	67	M	0	0	2014-04-07	2014-04-07	false	Premolars	7.62782	VitE	M	Premolar
156	21	2002-08-07	Group1	2002-08-07	2002-08-22	1	2005-05-23	5	retreatment	0		0	#NULL!	0	0	0	2005-11-25	67	M	1	1	2005-11-25	2005-05-23	false	Anterior	2.79267	VitE	M	Anterior
157	13	2012-02-09	Group 3	2012-02-09	2012-03-08	1	#NULL!	#NULL!	0	0		0	#NULL!	0	0	8	2016-05-24	66	W	0	0	2016-05-24	2016-05-24	false	Anterior	4.28757	Trep1	W	Anterior
158	38	1999-12-02	Group1	1999-12-02	2000-01-10	1	#NULL!	#NULL!	0	0		extracted	2010-03-15	0	0	0	2016-04-28	49	W	3	1	2010-03-15	2010-03-15	false	Molars	10.2836	VitE	W	Molar
158	26	2012-03-12	Group 3	2012-03-20	2012-03-21	2	#NULL!	#NULL!	0	0		0	#NULL!	1	0	8	2016-04-28	61	W	0	0	2016-04-28	2016-04-28	false	Molars	4.12877	Trep1	W	Molar
159	26	2003-04-17	Group1	2003-04-17	2003-05-05	1	2007-07-31	1	0	root end surgery	WR	0	#NULL!	0	0	7	2016-06-13	47	W	2	1	2016-06-13	2007-07-31	false	Molars	4.28757	VitE	W	Molar
159	16	2012-02-06	Group 3	2012-02-06	2012-02-28	1	2014-11-13	3	retreatment	0		0	#NULL!	1	1	7	2016-06-13	56	W	1	1	2016-06-13	2014-11-13	false	Molars	2.76803	Trep1	W	Molar
159	47	2015-05-28	Group 3	2015-05-28	2015-06-01	1	#NULL!	#NULL!	0	0		0	#NULL!	5	1	2	2016-06-13	59	W	0	0	2016-06-13	2016-06-13	false	Molars	1.04588	Trep1	W	Molar
160	14	2009-03-04	Group 2	2009-03-04	2009-04-22	1	#NULL!	#NULL!	0	0		0	#NULL!	0	0	0	2016-08-01	72	M	0	0	2016-08-01	2016-08-01	false	Premolars	7.41152	Trep1	M	Premolar
161	24	2002-01-02	Group1	2002-01-02	2002-03-06	2	#NULL!	#NULL!	0	0		0	#NULL!	0	0	19	2016-09-26	47	W	0	0	2016-09-26	2016-09-26	false	Premolars	14.7327	VitE	W	Premolar
161	25	2005-02-23	Group1	2005-02-23	2005-05-30	2	#NULL!	#NULL!	0	0		extracted	2008-09-24	2	0	19	2016-09-26	50	W	3	1	2008-09-24	2008-09-24	false	Premolars	3.58393	VitE	W	Premolar
161	47	2009-06-30	Group 2	2009-06-30	2009-08-11	1	#NULL!	#NULL!	0	0		extracted	2011-03-15	3	0	19	2016-09-26	55	W	3	1	2011-03-15	2011-03-15	false	Molars	1.70572	VitE	W	Molar
162	25	2000-07-06	Group1	2000-07-06	2000-09-19	3	#NULL!	#NULL!	0	0		extracted	2006-10-23	0	0	0	2016-06-15	39	W	3	1	2006-10-23	2006-10-23	false	Premolars	6.29719	VitE	W	Premolar
162	37	2002-09-23	Group1	2002-09-23	2002-11-21	5	2011-05-26	7	retreatment	0		0	#NULL!	1	0	10	2016-06-15	41	W	1	1	2016-06-15	2011-05-26	false	Molars	8.67096	VitE	W	Molar
162	36	2011-06-09	Group 2	2011-06-09	2011-06-29	1	#NULL!	#NULL!	0	0		0	#NULL!	5	0	5	2016-06-15	50	W	0	0	2016-06-15	2016-06-15	false	Molars	5.01859	Trep1	W	Molar
162	46	2011-06-30	Group 2	2011-06-30	2011-09-12	2	2012-10-31	1	0	root end surgery	WR	0	#NULL!	6	0	5	2016-06-15	50	W	2	1	2016-06-15	2012-10-31	false	Molars	1.33884	Trep1	W	Molar
163	34	2007-03-14	Group1	2007-03-14	2007-04-02	1	#NULL!	#NULL!	0	0		extracted	2015-02-24	1	0	4	2016-07-27	63	M	3	1	2015-02-24	2015-02-24	false	Premolars	7.95089	VitE	M	Premolar
163	14	2012-07-31	Group 3	2012-07-31	2012-08-14	1	#NULL!	#NULL!	0	0		extracted	2012-11-14	2	0	6	2016-07-27	69	M	3	1	2012-11-14	2012-11-14	false	Premolars	0.290219	Trep1	M	Premolar
164	33	2008-12-03	Group1	2008-12-03	2009-01-13	2	#NULL!	#NULL!	0	0		extracted	2012-04-25	0	0	0	2012-11-27	83	W	3	1	2012-04-25	2012-04-25	false	Anterior	3.39227	VitE	W	Anterior
165	44	2000-01-11	Group1	2000-01-11	2000-02-08	2	#NULL!	#NULL!	0	0		extracted	2009-03-23	0	0	0	2016-08-10	61	W	3	1	2009-03-23	2009-03-23	false	Premolars	9.19664	Trep1	W	Premolar
165	43	2000-01-11	Group1	2000-01-11	2000-02-08	2	#NULL!	#NULL!	0	0		0	#NULL!	0	0	14	2016-08-10	61	W	0	0	2016-08-10	2016-08-10	false	Anterior	16.5808	Trep1	W	Anterior
165	41	2009-06-16	Group 2	2009-06-16	2009-07-02	1	#NULL!	#NULL!	0	0		0	#NULL!	2	0	14	2016-08-10	70	W	0	0	2016-08-10	2016-08-10	false	Anterior	7.15142	Trep1	W	Anterior
165	42	2010-02-03	Group 2	2010-02-03	2010-09-21	2	#NULL!	#NULL!	0	0		0	#NULL!	3	0	14	2016-08-10	71	W	0	0	2016-08-10	2016-08-10	false	Anterior	6.51623	Trep1	W	Anterior
166	36	2001-04-12	Group1	2001-04-12	2001-06-21	4	#NULL!	#NULL!	0	0		extracted	2003-07-01	0	0	0	2016-02-05	63	W	3	1	2003-07-01	2003-07-01	false	Molars	2.21771	VitE	W	Molar
166	13	2001-07-26	Group1	2001-07-26	2002-01-24	3	#NULL!	#NULL!	0	0		extracted	2007-08-21	2	0	0	2016-02-05	63	W	3	1	2007-08-21	2007-08-21	false	Anterior	6.06995	Trep1	W	Anterior
166	42	2003-07-01	Group1	2003-07-01	2003-07-01	0	#NULL!	#NULL!	0	0		0	#NULL!	5	0	5	2016-02-05	65	W	0	0	2016-02-05	2016-02-05	true	Anterior	12.5999	VitE	W	Anterior
166	41	2003-07-01	Group1	2003-07-01	2003-07-01	0	#NULL!	#NULL!	0	0		0	#NULL!	5	0	3	2016-02-05	65	W	0	0	2016-02-05	2016-02-05	true	Anterior	12.5999	VitE	W	Anterior
166	43	2004-04-29	Group1	2004-04-29	2004-06-17	2	#NULL!	#NULL!	0	0		extracted	2013-08-14	8	0	4	2016-02-05	66	W	3	1	2013-08-14	2013-08-14	false	Anterior	9.29247	Trep1	W	Anterior
166	11	2015-10-08	Group 3	2015-10-08	2015-10-08	0	#NULL!	#NULL!	0	0		0	#NULL!	9	0	1	2016-02-05	77	W	0	0	2016-02-05	2016-02-05	true	Anterior	0.328549	Trep1	W	Anterior
167	12	2000-05-15	Group1	2000-05-15	2000-05-23	2	#NULL!	#NULL!	0	0		extracted	2004-03-16	0	0	0	2007-11-21	65	W	3	1	2004-03-16	2004-03-16	false	Anterior	3.83581	Trep1	W	Anterior
167	22	2000-10-11	Group1	2000-10-11	2000-11-08	2	#NULL!	#NULL!	0	0		0	#NULL!	1	0	0	2007-11-21	66	W	0	0	2007-11-21	2007-11-21	false	Anterior	7.11035	Trep1	W	Anterior
167	23	2002-07-25	Group1	2002-07-25	2002-09-19	2	#NULL!	#NULL!	0	0		0	#NULL!	2	0	0	2007-11-21	68	W	0	0	2007-11-21	2007-11-21	false	Anterior	5.32524	VitE	W	Anterior
168	24	2011-06-28	Group 2	2011-06-28	2011-07-27	2	#NULL!	#NULL!	0	0		0	#NULL!	0	0	11	2016-09-06	60	M	0	0	2016-09-06	2016-09-06	false	Premolars	5.19382	Trep1	M	Premolar
168	17	2011-07-13	Group 2	2011-07-13	2011-07-27	1	#NULL!	#NULL!	0	0		0	#NULL!	1	0	11	2016-09-06	60	M	0	0	2016-09-06	2016-09-06	false	Molars	5.15275	Trep1	M	Molar
168	26	2013-03-12	Group 3	2013-04-10	2013-04-10	1	#NULL!	#NULL!	0	0		0	#NULL!	2	0	10	2016-09-06	62	M	0	0	2016-09-06	2016-09-06	true	Molars	3.4881	VitE	M	Molar
168	45	2014-10-29	Group 3	2014-10-29	2015-02-23	1	#NULL!	#NULL!	0	0		0	#NULL!	3	0	6	2016-09-06	63	M	0	0	2016-09-06	2016-09-06	false	Premolars	1.8563	VitE	M	Premolar
169	27	1999-07-22	Group1	1999-07-22	1999-09-06	1	2012-09-19	5	retreatment	0		0	#NULL!	0	0	11	2016-08-16	41	W	1	1	2016-08-16	2012-09-19	false	Molars	13.1639	VitE	W	Molar
169	45	2005-08-24	Group1	2005-08-24	2005-08-24	0	#NULL!	#NULL!	0	0		0	#NULL!	2	0	6	2016-08-16	47	W	0	0	2016-08-16	2016-08-16	true	Premolars	10.979	VitE	W	Premolar
169	37	2008-03-18	Group1	2008-04-14	2008-05-27	1	#NULL!	#NULL!	0	0		0	#NULL!	3	0	6	2016-08-16	50	W	0	0	2016-08-16	2016-08-16	false	Molars	8.4136	VitE	W	Molar
170	24	2010-01-28	Group1	2010-01-28	2010-02-08	1	#NULL!	#NULL!	0	0		0	#NULL!	0	0	0	2016-09-07	65	W	0	0	2016-09-07	2016-09-07	false	Premolars	6.60932	Trep1	W	Premolar
170	11	2010-02-04	Group1	2010-02-04	2010-02-23	1	#NULL!	#NULL!	0	0		0	#NULL!	1	0	0	2016-09-07	65	W	0	0	2016-09-07	2016-09-07	false	Anterior	6.59015	Trep1	W	Anterior
171	16	2012-02-29	Group 3	2012-02-29	2012-06-26	2	#NULL!	#NULL!	0	0		0	#NULL!	0	0	1	2015-06-23	66	M	0	0	2015-06-23	2015-06-23	false	Molars	3.31287	Trep1	M	Molar
171	23	2013-02-21	Group 3	2013-02-26	2013-04-02	3	#NULL!	#NULL!	0	0		0	#NULL!	5	0	1	2015-06-23	67	M	0	0	2015-06-23	2015-06-23	false	Anterior	2.3327	VitE	M	Anterior
172	22	2014-03-18	Group 3	2014-03-18	2014-03-18	0	#NULL!	#NULL!	0	0		0	#NULL!	0	0	2	2016-06-29	71	W	0	0	2016-06-29	2016-06-29	true	Anterior	2.28342	VitE	W	Anterior
173	22	2003-01-21	Group1	2003-01-21	2003-02-10	1	#NULL!	#NULL!	0	0		0	#NULL!	0	0	0	2003-10-06	77	M	0	0	2003-10-06	2003-10-06	false	Anterior	0.706381	VitE	M	Anterior
173	12	2003-01-21	Group1	2003-01-21	2003-02-10	1	#NULL!	#NULL!	0	0		0	#NULL!	0	0	0	2003-10-06	77	M	0	0	2003-10-06	2003-10-06	false	Anterior	0.706381	VitE	M	Anterior
174	37	2006-03-21	Group1	2006-04-12	2006-04-26	1	#NULL!	#NULL!	0	0		0	#NULL!	2	0	0	2008-04-24	29	W	0	0	2008-04-24	2008-04-24	false	Molars	2.0945	VitE	W	Molar
174	17	2006-08-01	Group1	2006-08-25	2006-09-13	1	#NULL!	#NULL!	0	0		0	#NULL!	3	0	0	2008-04-24	29	W	0	0	2008-04-24	2008-04-24	false	Molars	1.73036	VitE	W	Molar
175	16	1999-11-29	Group1	1999-11-29	2000-01-12	1	#NULL!	#NULL!	0	0		extracted	2016-06-15	0	0	2	2016-06-28	60	W	3	1	2016-06-15	2016-06-15	false	Molars	16.5452	VitE	W	Molar
176	35	2002-01-24	Group1	2002-01-24	2002-01-30	1	#NULL!	#NULL!	0	0		extracted	2007-06-21	0	0	0	2016-03-21	71	M	3	1	2007-06-21	2007-06-21	false	Premolars	5.40464	Trep1	M	Premolar
177	17	2016-05-23	Group 3	2016-05-23	2016-05-25	1	#NULL!	#NULL!	0	0		0	#NULL!	0	0	0	2016-05-25	66	M	0	0	2016-05-25	2016-05-25	false	Molars	0.00547582	VitE	M	Molar
178	26	2011-01-11	Group 2	2011-01-11	2011-02-15	2	#NULL!	#NULL!	0	0		0	#NULL!	0	0	9	2016-09-06	58	W	0	0	2016-09-06	2016-09-06	false	Molars	5.65379	VitE	W	Molar
179	27	2007-08-06	Group1	2007-08-06	2007-09-11	2	#NULL!	#NULL!	0	0		0	#NULL!	0	0	0	2015-09-21	58	M	0	0	2015-09-21	2015-09-21	false	Molars	8.12612	VitE	M	Molar
180	36	2002-09-10	Group1	2002-09-10	2002-09-25	2	#NULL!	#NULL!	0	0		0	#NULL!	0	0	0	2009-03-10	62	W	0	0	2009-03-10	2009-03-10	false	Molars	6.49706	VitE	W	Molar
181	45	2004-12-01	Group1	2004-12-01	2004-12-20	1	#NULL!	#NULL!	0	0		extracted	2015-05-05	0	0	7	2016-07-28	64	M	3	1	2015-05-05	2015-05-05	false	Premolars	10.4232	Trep1	M	Premolar
182	24	1999-08-16	Group1	1999-08-16	1999-09-22	1	2005-11-30	1	0	root end surgery	WR	0	#NULL!	0	0	2	2014-03-13	49	M	2	1	2014-03-13	2005-11-30	false	Premolars	6.29172	Trep1	M	Premolar
182	14	2010-11-17	Group 2	2010-11-17	2010-12-20	2	2011-12-21	2	retreatment	0		0	#NULL!	2	1	2	2014-03-13	61	M	1	1	2014-03-13	2011-12-21	false	Premolars	1.09243	Trep1	M	Premolar
182	33	2014-02-25	Group 3	2014-02-25	2014-03-13	1	#NULL!	#NULL!	0	0		0	#NULL!	5	1	0	2014-03-13	64	M	0	0	2014-03-13	2014-03-13	false	Anterior	0.0438066	VitE	M	Anterior
183	45	2008-09-22	Group1	2008-09-22	2008-10-07	1	#NULL!	#NULL!	0	0		0	#NULL!	0	0	1	2016-08-26	67	M	0	0	2016-08-26	2016-08-26	false	Premolars	7.92625	VitE	M	Premolar
184	34	2009-05-08	Group 2	2009-05-08	2009-06-08	3	#NULL!	#NULL!	0	0		extracted	2013-08-27	0	0	7	2015-11-17	65	W	3	1	2013-08-27	2013-08-27	false	Premolars	4.304	VitE	W	Premolar
184	44	2010-10-06	Group 2	2010-10-06	2010-11-03	2	#NULL!	#NULL!	0	0		extracted	2015-01-13	1	0	6	2015-11-17	66	W	3	1	2015-01-13	2015-01-13	false	Premolars	4.27114	Trep1	W	Premolar
185	23	2003-10-27	Group1	2003-10-27	2003-11-04	1	#NULL!	#NULL!	0	0		extracted	2010-01-21	0	0	0	2016-07-11	56	M	3	1	2010-01-21	2010-01-21	false	Anterior	6.23696	VitE	M	Anterior
185	47	2008-10-06	Group 2	2008-10-06	2008-11-05	3	#NULL!	#NULL!	0	0		extracted	2010-05-19	1	0	8	2016-07-11	61	M	3	1	2010-05-19	2010-05-19	false	Molars	1.61537	Trep1	M	Molar
186	46	2001-01-30	Group1	2001-01-30	2001-05-15	3	#NULL!	#NULL!	0	0		extracted	2005-01-24	0	0	8	2016-08-16	59	M	3	1	2005-01-24	2005-01-24	false	Molars	3.98366	Trep1	M	Molar
186	15	2011-01-26	Group 2	2011-01-26	2011-02-03	1	#NULL!	#NULL!	0	0		0	#NULL!	3	0	8	2016-08-16	69	M	0	0	2016-08-16	2016-08-16	false	Premolars	5.55522	Trep1	M	Premolar
186	35	2013-06-18	Group 3	2013-06-18	2013-06-18	0	#NULL!	#NULL!	0	0		0	#NULL!	4	0	5	2016-08-16	72	M	0	0	2016-08-16	2016-08-16	true	Premolars	3.16229	Trep1	M	Premolar
187	27	2006-07-25	Group1	2006-07-25	2006-08-17	2	#NULL!	#NULL!	0	0		0	#NULL!	0	0	4	2015-12-16	46	M	0	0	2015-12-16	2015-12-16	false	Molars	9.39377	VitE	M	Molar
188	35	2003-02-26	Group1	2003-02-26	2003-05-06	4	2007-09-20	1	0	root end surgery	WR	extracted	2008-08-25	0	0	6	2016-04-11	31	W	3	1	2008-08-25	2007-09-20	false	Premolars	4.5641	Trep1	W	Premolar
189	25	2006-03-09	Group1	2006-03-09	2006-05-17	2	#NULL!	#NULL!	0	0		0	#NULL!	0	0	0	2007-12-12	38	M	0	0	2007-12-12	2007-12-12	false	Premolars	1.76048	VitE	M	Premolar
189	24	2006-03-09	Group1	2006-03-09	2006-07-19	4	#NULL!	#NULL!	0	0		0	#NULL!	0	0	0	2007-12-12	38	M	0	0	2007-12-12	2007-12-12	false	Premolars	1.76048	VitE	M	Premolar
190	33	2002-04-22	Group1	2002-04-22	2002-04-22	0	#NULL!	#NULL!	0	0		0	#NULL!	1	0	1	2016-05-30	62	W	0	0	2016-05-30	2016-05-30	true	Anterior	14.1057	VitE	W	Anterior
191	43	2003-02-17	Group1	2003-02-17	2003-03-17	1	#NULL!	#NULL!	0	0		0	#NULL!	1	0	0	2007-06-12	82	W	0	0	2007-06-12	2007-06-12	false	Anterior	4.31495	Trep1	W	Anterior
192	46	1999-11-23	Group1	1999-11-23	1999-12-02	1	#NULL!	#NULL!	0	0		0	#NULL!	0	0	4	2016-02-11	42	W	0	0	2016-02-11	2016-02-11	false	Molars	16.2194	VitE	W	Molar
192	37	2000-11-22	Group1	2000-11-22	2000-12-13	1	#NULL!	#NULL!	0	0		0	#NULL!	2	0	4	2016-02-11	43	W	0	0	2016-02-11	2016-02-11	false	Molars	15.22	VitE	W	Molar
193	45	2012-11-21	Group 3	2012-12-18	2012-12-18	1	#NULL!	#NULL!	0	0		0	#NULL!	0	0	4	2016-04-26	77	M	0	0	2016-04-26	2016-04-26	true	Premolars	3.42786	VitE	M	Premolar
194	44	2008-03-10	Group1	2008-03-10	2008-03-31	1	#NULL!	#NULL!	0	0		0	#NULL!	0	0	3	2016-02-29	67	M	0	0	2016-02-29	2016-02-29	false	Premolars	7.9728	Trep1	M	Premolar
194	45	2013-05-15	Group 3	2013-05-15	2013-06-06	1	#NULL!	#NULL!	0	0		0	#NULL!	3	0	3	2016-02-29	72	M	0	0	2016-02-29	2016-02-29	false	Premolars	2.79267	Trep1	M	Premolar
195	26	2003-01-02	Group1	2003-01-02	2003-04-03	4	#NULL!	#NULL!	0	0		0	#NULL!	0	0	0	2004-07-12	43	M	0	0	2004-07-12	2004-07-12	false	Molars	1.52502	VitE	M	Molar
196	36	2001-10-15	Group1	2001-10-15	2003-06-18	1	#NULL!	#NULL!	0	0		0	#NULL!	0	0	0	2016-09-13	54	M	0	0	2016-09-13	2016-09-13	false	Molars	14.9134	Trep1	M	Molar
197	18	2001-10-16	Group1	#NULL!	2002-01-21	3	#NULL!	#NULL!	0	0		extracted	2006-05-03	0	0	0	2016-02-10	46	M	3	1	2006-05-03	2006-05-03	false	Molars	4.54493	VitE	M	Molar
197	45	2015-01-12	Group 3	#NULL!	2015-02-12	2	#NULL!	#NULL!	0	0		0	#NULL!	0	0	0	2016-02-10	60	M	0	0	2016-02-10	2016-02-10	false	Premolars	1.07874	VitE	M	Premolar
198	14	2000-11-22	Group1	2000-11-22	2000-11-22	0	#NULL!	#NULL!	0	0		extracted	2007-07-19	0	0	0	2016-05-02	52	W	3	1	2007-07-19	2007-07-19	true	Premolars	6.65312	VitE	W	Premolar
198	45	2006-08-22	Group1	2006-08-22	2006-11-08	1	#NULL!	#NULL!	0	0		0	#NULL!	1	0	8	2016-05-02	58	W	0	0	2016-05-02	2016-05-02	false	Premolars	9.69494	VitE	W	Premolar
199	25	2003-08-15	Group1	2003-08-15	2003-09-30	2	#NULL!	#NULL!	0	0		extracted	2008-07-17	1	0	0	2016-05-02	62	W	3	1	2008-07-17	2008-07-17	false	Premolars	4.92276	VitE	W	Premolar
199	16	2008-07-17	Group1	2008-07-17	2008-08-07	2	2013-03-26	2	retreatment	0		0	#NULL!	2	0	8	2016-05-02	67	W	1	1	2016-05-02	2013-03-26	false	Molars	4.69004	VitE	W	Molar
199	14	2008-07-17	Group1	2008-07-17	2008-08-07	2	#NULL!	#NULL!	0	0		0	#NULL!	2	0	8	2016-05-02	67	W	0	0	2016-05-02	2016-05-02	false	Premolars	7.79209	Trep1	W	Premolar
200	25	1999-08-17	Group1	1999-08-17	1999-09-02	1	#NULL!	#NULL!	0	0		0	#NULL!	0	0	8	2016-06-03	60	W	0	0	2016-06-03	2016-06-03	false	Premolars	16.7971	VitE	W	Premolar
201	47	2004-12-16	Group1	2004-12-16	2005-05-23	4	2016-04-27	5	retreatment	0		0	#NULL!	0	0	11	2016-07-20	68	M	1	1	2016-07-20	2016-04-27	false	Molars	11.3623	VitE	M	Molar
201	46	2004-12-16	Group1	2004-12-16	2012-04-04	5	#NULL!	#NULL!	0	0		0	#NULL!	0	0	20	2016-07-20	68	M	0	0	2016-07-20	2016-07-20	false	Molars	11.5923	VitE	M	Molar
202	35	2003-10-14	Group1	2003-10-14	2004-01-26	3	#NULL!	#NULL!	0	0		0	#NULL!	1	0	0	2009-12-14	66	W	0	0	2009-12-14	2009-12-14	false	Premolars	6.16851	VitE	W	Premolar
203	35	2002-03-19	Group1	2002-03-21	2002-04-02	1	#NULL!	#NULL!	0	0		0	#NULL!	0	0	0	2016-01-11	61	M	0	0	2016-01-11	2016-01-11	false	Premolars	13.8155	Trep1	M	Premolar
203	11	2005-10-27	Group1	2005-10-27	2005-12-01	2	2006-04-25	1	0	root end surgery	WR	extracted	2013-06-13	1	0	0	2016-01-11	64	M	3	1	2013-06-13	2006-04-25	false	Anterior	0.492824	Trep1	M	Anterior
204	35	2004-08-30	Group1	2004-08-30	2008-06-12	3	2011-07-14	4	retreatment	0		0	#NULL!	0	0	14	2016-06-16	48	W	1	1	2016-06-16	2011-07-14	false	Premolars	6.86942	Trep1	W	Premolar
205	43	2003-12-01	Group1	2003-12-01	2004-02-17	2	#NULL!	#NULL!	0	0		extracted	2008-11-24	0	0	5	2016-05-31	53	W	3	1	2008-11-24	2008-11-24	false	Anterior	4.983	Trep1	W	Anterior
206	33	2005-04-21	Group1	2005-04-21	2005-05-10	2	#NULL!	#NULL!	0	0		0	#NULL!	0	0	0	2006-11-30	84	M	0	0	2006-11-30	2006-11-30	false	Anterior	1.60989	VitE	M	Anterior
207	11	2000-10-10	Group1	2000-10-24	2000-10-24	0	#NULL!	#NULL!	0	0		extracted	2002-08-13	0	0	0	2014-09-24	78	W	3	1	2002-08-13	2002-08-13	true	Anterior	1.83988	Trep1	W	Anterior
208	14	2001-02-08	Group1	2001-02-08	2001-02-08	0	#NULL!	#NULL!	0	0		0	#NULL!	0	0	0	2004-04-14	72	M	0	0	2004-04-14	2004-04-14	true	Premolars	3.17871	VitE	M	Premolar
208	13	2003-01-27	Group1	2003-01-27	2003-02-18	2	#NULL!	#NULL!	0	0		0	#NULL!	1	0	0	2004-04-14	74	M	0	0	2004-04-14	2004-04-14	false	Anterior	1.21289	VitE	M	Anterior
208	26	2003-03-26	Group1	2003-03-26	2004-04-01	4	#NULL!	#NULL!	0	0		0	#NULL!	3	0	0	2004-04-14	74	M	0	0	2004-04-14	2004-04-14	false	Molars	1.0541	Trep1	M	Molar
209	26	2008-05-13	Group1	2008-05-13	2008-07-03	2	#NULL!	#NULL!	0	0		extracted	2010-03-03	0	0	2	2016-08-31	53	M	3	1	2010-03-03	2010-03-03	false	Molars	1.80428	Trep1	M	Molar
210	45	2002-02-28	Group1	2002-02-28	2002-03-12	1	#NULL!	#NULL!	0	0		0	#NULL!	0	0	0	2006-09-13	74	W	0	0	2006-09-13	2006-09-13	false	Premolars	4.53946	Trep1	W	Premolar
210	33	2003-12-17	Group1	2003-12-17	2004-01-14	1	#NULL!	#NULL!	0	0		0	#NULL!	1	0	0	2006-09-13	76	W	0	0	2006-09-13	2006-09-13	false	Anterior	2.74065	VitE	W	Anterior
211	47	2009-12-10	Group 2	2009-12-10	2010-03-30	1	#NULL!	#NULL!	0	0		0	#NULL!	0	0	0	2016-09-23	46	W	0	0	2016-09-23	2016-09-23	false	Molars	6.78728	Trep1	W	Molar
211	16	2010-11-09	Group 2	2010-11-09	2011-03-02	1	#NULL!	#NULL!	0	0		0	#NULL!	1	0	0	2016-09-23	47	W	0	0	2016-09-23	2016-09-23	false	Molars	5.87282	Trep1	W	Molar
211	32	2012-03-06	Group 3	2012-03-06	2012-03-27	1	#NULL!	#NULL!	0	0		0	#NULL!	2	0	0	2016-09-23	49	W	0	0	2016-09-23	2016-09-23	false	Anterior	4.55041	VitE	W	Anterior
211	24	2016-07-25	Group 3	2016-09-23	2016-09-23	2	#NULL!	#NULL!	0	0		0	#NULL!	4	0	0	2016-09-23	53	W	0	0	2016-09-23	2016-09-23	true	Premolars	0.164275	VitE	W	Premolar
212	22	2007-05-08	Group1	2007-05-08	2007-05-23	1	#NULL!	#NULL!	0	0		0	#NULL!	0	0	0	2014-07-24	62	W	0	0	2014-07-24	2014-07-24	false	Anterior	7.21166	Trep1	W	Anterior
213	45	2002-11-18	Group1	2002-11-18	2002-11-18	0	#NULL!	#NULL!	0	0		0	#NULL!	0	0	0	2003-01-20	75	M	0	0	2003-01-20	2003-01-20	true	Premolars	0.172488	VitE	M	Premolar
214	26	2006-03-14	Group1	2006-03-14	2006-04-13	1	#NULL!	#NULL!	0	0		0	#NULL!	0	0	7	2016-08-29	50	W	0	0	2016-08-29	2016-08-29	false	Molars	10.4616	VitE	W	Molar
215	24	2006-01-13	Group1	2006-01-13	2006-02-21	2	#NULL!	#NULL!	0	0		0	#NULL!	0	0	0	2006-02-21	44	M	0	0	2006-02-21	2006-02-21	false	Premolars	0.106779	VitE	M	Premolar
216	13	2001-04-11	Group1	2001-04-11	2001-04-30	1	#NULL!	#NULL!	0	0		extracted	2005-08-15	0	0	0	2014-05-15	64	M	3	1	2005-08-15	2005-08-15	false	Anterior	4.34506	Trep1	M	Anterior
216	34	2008-05-02	Group1	2008-05-02	2008-06-03	2	#NULL!	#NULL!	0	0		0	#NULL!	1	0	0	2014-05-15	71	M	0	0	2014-05-15	2014-05-15	false	Premolars	6.03436	Trep1	M	Premolar
216	33	2012-05-24	Group 3	2012-05-24	2012-05-24	0	#NULL!	#NULL!	0	0		0	#NULL!	2	0	0	2014-05-15	75	M	0	0	2014-05-15	2014-05-15	true	Anterior	1.97403	VitE	M	Anterior
217	43	2006-03-28	Group1	2006-03-28	2006-06-22	2	#NULL!	#NULL!	0	0		0	#NULL!	0	0	0	2016-04-18	40	W	0	0	2016-04-18	2016-04-18	false	Anterior	10.0591	Trep1	W	Anterior
218	48	2002-05-08	Group1	2002-05-08	2002-10-02	2	#NULL!	#NULL!	0	0		0	#NULL!	0	0	0	2012-11-08	70	W	0	0	2012-11-08	2012-11-08	false	Molars	10.5054	VitE	W	Molar
218	32	2002-06-26	Group1	2002-06-26	2003-01-07	3	#NULL!	#NULL!	0	0		0	#NULL!	1	0	0	2012-11-08	70	W	0	0	2012-11-08	2012-11-08	false	Anterior	10.3712	Trep1	W	Anterior
218	31	2002-06-26	Group1	2002-06-26	2003-01-07	3	#NULL!	#NULL!	0	0		0	#NULL!	1	0	0	2012-11-08	70	W	0	0	2012-11-08	2012-11-08	false	Anterior	10.3712	Trep1	W	Anterior
219	45	2006-05-18	Group1	2006-05-18	2006-08-03	3	#NULL!	#NULL!	0	0		0	#NULL!	0	0	5	2015-12-31	51	W	0	0	2015-12-31	2015-12-31	false	Premolars	9.62102	VitE	W	Premolar
220	13	2005-11-07	Group1	2005-11-07	2005-11-07	0	#NULL!	#NULL!	0	0		0	#NULL!	0	0	1	2016-08-04	52	M	0	0	2016-08-04	2016-08-04	true	Anterior	10.7408	VitE	M	Anterior
221	14	2003-04-14	Group1	2003-04-14	2003-04-24	1	#NULL!	#NULL!	0	0		0	#NULL!	0	0	0	2009-01-15	45	M	0	0	2009-01-15	2009-01-15	false	Premolars	5.75783	Trep1	M	Premolar
221	25	2004-12-13	Group1	2004-12-13	2005-01-17	1	#NULL!	#NULL!	0	0		0	#NULL!	1	0	0	2009-01-15	47	M	0	0	2009-01-15	2009-01-15	false	Premolars	4.09044	VitE	M	Premolar
222	34	2012-10-23	Group 3	2012-10-23	2012-11-27	1	#NULL!	#NULL!	0	0		0	#NULL!	0	0	0	2016-08-30	88	W	0	0	2016-08-30	2016-08-30	false	Premolars	3.85224	Trep1	W	Premolar
223	16	1999-08-23	Group1	1999-08-23	1999-09-09	1	#NULL!	#NULL!	0	0		0	#NULL!	0	0	0	2003-11-17	20	W	0	0	2003-11-17	2003-11-17	false	Molars	4.23555	VitE	W	Molar
224	33	2005-07-13	Group1	2005-07-13	2005-10-05	2	#NULL!	#NULL!	0	0		0	#NULL!	0	0	3	2016-07-14	56	M	0	0	2016-07-14	2016-07-14	false	Anterior	11.0037	VitE	M	Anterior
225	47	2005-05-10	Group1	2005-05-10	2005-07-05	2	#NULL!	#NULL!	0	0		0	#NULL!	0	0	0	2007-03-29	44	W	0	0	2007-03-29	2007-03-29	false	Molars	1.88368	Trep1	W	Molar
226	23	2000-11-06	Group1	2000-11-06	2000-11-08	1	#NULL!	#NULL!	0	0		0	#NULL!	0	0	1	2016-08-16	63	W	0	0	2016-08-16	2016-08-16	false	Anterior	15.7758	Trep1	W	Anterior
226	22	2000-11-06	Group1	2000-11-06	2000-11-08	0	#NULL!	#NULL!	0	0		0	#NULL!	0	0	1	2016-08-16	63	W	0	0	2016-08-16	2016-08-16	false	Anterior	15.7758	Trep1	W	Anterior
226	43	2002-07-29	Group1	2002-09-25	2002-10-14	1	#NULL!	#NULL!	0	0		extracted	2002-10-21	2	2	0	2016-08-16	64	W	3	1	2002-10-21	2002-10-21	false	Anterior	0.229985	Trep1	W	Anterior
227	26	2003-01-15	Group1	2003-01-15	2003-02-05	1	#NULL!	#NULL!	0	0		0	#NULL!	0	0	10	2016-07-21	73	M	0	0	2016-07-21	2016-07-21	false	Molars	13.5143	Trep1	M	Molar
228	47	2005-01-27	Group1	2005-01-27	2005-05-03	3	#NULL!	#NULL!	0	0		0	#NULL!	0	0	4	2016-06-15	52	W	0	0	2016-06-15	2016-06-15	false	Molars	11.3815	Trep1	W	Molar
229	15	2001-06-27	Group1	2001-06-27	2001-07-16	1	#NULL!	#NULL!	0	0		extracted	2012-07-10	0	0	1	2016-07-05	69	M	3	1	2012-07-10	2012-07-10	false	Premolars	11.0365	VitE	M	Premolar
229	47	2005-04-06	Group1	2005-04-06	2005-04-13	1	#NULL!	#NULL!	0	0		0	#NULL!	1	0	6	2016-07-05	73	M	0	0	2016-07-05	2016-07-05	false	Molars	11.2473	Trep1	M	Molar
229	23	2014-11-13	Group 3	2014-11-13	2014-11-13	0	#NULL!	#NULL!	0	0		0	#NULL!	2	0	2	2016-07-05	83	M	0	0	2016-07-05	2016-07-05	true	Anterior	1.64275	Trep1	M	Anterior
230	23	2001-11-07	Group1	2001-11-07	2001-11-07	0	#NULL!	#NULL!	0	0		0	#NULL!	0	0	0	2014-01-14	76	M	0	0	2014-01-14	2014-01-14	true	Anterior	12.1864	VitE	M	Anterior
230	27	2011-07-14	Group 2	2011-07-14	2011-08-09	2	#NULL!	#NULL!	0	0		0	#NULL!	1	0	0	2014-01-14	86	M	0	0	2014-01-14	2014-01-14	false	Molars	2.50519	VitE	M	Molar
231	25	2002-01-07	Group1	2002-01-07	2002-02-21	2	#NULL!	#NULL!	0	0		0	#NULL!	2	0	0	2009-12-17	33	W	0	0	2009-12-17	2009-12-17	false	Premolars	7.94268	VitE	W	Premolar
231	47	2007-07-19	Group1	2007-07-19	2008-02-26	5	#NULL!	#NULL!	0	0		0	#NULL!	3	0	0	2009-12-17	39	W	0	0	2009-12-17	2009-12-17	false	Molars	2.41484	VitE	W	Molar
232	27	1999-08-03	Group1	1999-08-03	1999-08-03	0	2000-11-28	2	retreatment	0		extracted	2000-11-29	0	0	0	2004-07-22	72	W	3	1	2000-11-29	2000-11-28	true	Molars	1.32241	VitE	W	Molar
232	11	2002-12-19	Group1	2002-12-19	2003-01-16	1	#NULL!	#NULL!	0	0		0	#NULL!	3	0	0	2004-07-22	75	W	0	0	2004-07-22	2004-07-22	false	Anterior	1.59073	Trep1	W	Anterior
232	12	2003-03-20	Group1	2003-03-20	2003-03-20	0	#NULL!	#NULL!	0	0		0	#NULL!	4	0	0	2004-07-22	76	W	0	0	2004-07-22	2004-07-22	true	Anterior	1.34158	Trep1	W	Anterior
233	24	1999-07-19	Group1	1999-07-20	1999-08-18	2	#NULL!	#NULL!	0	0		0	#NULL!	0	0	6	2015-03-02	57	W	0	0	2015-03-02	2015-03-02	false	Premolars	15.6198	Trep1	W	Premolar
233	44	2002-06-04	Group1	2002-06-04	2002-06-19	2	#NULL!	#NULL!	0	0		extracted	2004-10-07	1	0	6	2015-03-02	60	W	3	1	2004-10-07	2004-10-07	false	Premolars	2.34365	VitE	W	Premolar
233	34	2004-03-18	Group1	2004-03-18	2004-06-08	2	#NULL!	#NULL!	0	0		0	#NULL!	2	0	6	2015-03-02	62	W	0	0	2015-03-02	2015-03-02	false	Premolars	10.9544	Trep1	W	Premolar
233	33	2006-10-10	Group1	2006-10-10	2006-10-10	0	#NULL!	#NULL!	0	0		extracted	2007-12-11	3	0	6	2015-03-02	65	W	3	1	2007-12-11	2007-12-11	true	Anterior	1.16909	Trep1	W	Anterior
233	16	2008-04-02	Group1	2008-04-02	2008-04-21	1	#NULL!	#NULL!	0	0		0	#NULL!	4	0	6	2015-03-02	66	W	0	0	2015-03-02	2015-03-02	false	Molars	6.91322	Trep1	W	Molar
234	27	1999-05-27	Group1	1999-05-27	1999-06-08	1	#NULL!	#NULL!	0	0		extracted	1999-11-16	0	0	0	2011-02-08	56	M	3	1	1999-11-16	1999-11-16	false	Molars	0.473659	VitE	M	Molar
234	25	2002-03-05	Group1	2002-03-05	2002-05-07	4	#NULL!	#NULL!	0	0		0	#NULL!	3	0	0	2011-02-08	59	M	0	0	2011-02-08	2011-02-08	false	Premolars	8.93106	Trep1	M	Premolar
235	17	2001-03-02	Group1	2001-03-02	2001-04-11	3	#NULL!	#NULL!	0	0		0	#NULL!	2	0	0	2007-07-19	51	W	0	0	2007-07-19	2007-07-19	false	Molars	6.37933	VitE	W	Molar
236	46	2008-03-18	Group1	2008-03-18	2008-12-03	4	#NULL!	#NULL!	0	0		0	#NULL!	0	0	1	2016-02-23	69	W	0	0	2016-02-23	2016-02-23	false	Molars	7.93447	VitE	W	Molar
237	42	2009-11-18	Group 2	2009-11-18	2009-12-02	1	#NULL!	#NULL!	0	0		0	#NULL!	0	0	4	2016-09-19	73	W	0	0	2016-09-19	2016-09-19	false	Anterior	6.83656	Trep1	W	Anterior
238	15	2002-11-13	Group1	2002-11-13	2002-11-25	1	#NULL!	#NULL!	0	0		extracted	2005-06-02	2	0	0	2006-04-21	68	M	3	1	2005-06-02	2005-06-02	false	Premolars	2.55173	VitE	M	Premolar
239	17	2010-05-17	Group 2	2010-05-17	2010-06-01	1	#NULL!	#NULL!	0	0		0	#NULL!	0	0	10	2016-07-01	59	M	0	0	2016-07-01	2016-07-01	false	Molars	6.12471	VitE	M	Molar
240	22	2003-11-19	Group1	2003-11-19	2003-11-26	1	#NULL!	#NULL!	0	0		0	#NULL!	0	0	0	2006-12-18	72	W	0	0	2006-12-18	2006-12-18	false	Anterior	3.08015	Trep1	W	Anterior
241	23	2011-02-28	Group 2	2011-02-28	2011-03-21	2	#NULL!	#NULL!	0	0		0	#NULL!	0	0	2	2014-11-27	80	W	0	0	2014-11-27	2014-11-27	false	Anterior	3.74546	VitE	W	Anterior
242	37	2000-10-30	Group1	2000-10-30	2000-11-29	1	#NULL!	#NULL!	0	0		0	#NULL!	0	0	14	2016-07-14	60	M	0	0	2016-07-14	2016-07-14	false	Molars	15.7047	VitE	M	Molar
243	16	2004-02-10	Group1	2004-02-10	2004-02-10	0	#NULL!	#NULL!	0	0		0	#NULL!	0	0	0	2005-07-14	53	M	0	0	2005-07-14	2005-07-14	true	Molars	1.42371	VitE	M	Molar
244	23	2002-01-24	Group1	2002-01-24	2002-07-18	1	#NULL!	#NULL!	0	0		extracted	2007-02-21	0	0	0	2014-07-08	68	W	3	1	2007-02-21	2007-02-21	false	Anterior	5.07609	VitE	W	Anterior
245	43	2000-05-02	Group1	2000-05-02	2000-05-02	0	#NULL!	#NULL!	0	0		0	#NULL!	0	0	8	2016-09-26	55	M	0	0	2016-09-26	2016-09-26	true	Anterior	16.4028	VitE	M	Anterior
246	16	2001-03-21	Group1	2001-03-21	2001-10-02	4	#NULL!	#NULL!	0	0		0	#NULL!	0	0	0	2008-01-15	60	M	0	0	2008-01-15	2008-01-15	false	Molars	6.82014	VitE	M	Molar
246	45	2001-08-06	Group1	2001-08-06	2001-09-11	2	#NULL!	#NULL!	0	0		0	#NULL!	1	0	0	2008-01-15	61	M	0	0	2008-01-15	2008-01-15	false	Premolars	6.4423	Trep1	M	Premolar
247	15	2005-04-12	Group1	2005-04-12	2005-04-12	0	#NULL!	#NULL!	0	0		0	#NULL!	0	0	0	2006-08-03	61	M	0	0	2006-08-03	2006-08-03	true	Premolars	1.30872	VitE	M	Premolar
247	23	2006-07-20	Group1	2006-07-20	2006-07-20	0	#NULL!	#NULL!	0	0		0	#NULL!	1	0	0	2006-08-03	62	M	0	0	2006-08-03	2006-08-03	true	Anterior	0.0383308	VitE	M	Anterior
248	24	2000-01-24	Group1	2000-01-24	2000-04-04	2	#NULL!	#NULL!	0	0		0	#NULL!	0	0	7	2016-08-16	45	M	0	0	2016-08-16	2016-08-16	false	Premolars	16.5616	VitE	M	Premolar
248	27	2008-06-25	Group1	2008-06-25	2008-07-10	2	#NULL!	#NULL!	0	0		0	#NULL!	1	0	7	2016-08-16	54	M	0	0	2016-08-16	2016-08-16	false	Molars	8.14255	VitE	M	Molar
248	15	2008-08-05	Group1	2008-08-05	2008-10-28	2	#NULL!	#NULL!	0	0		extracted	2016-08-16	3	0	7	2016-08-16	54	M	3	1	2016-08-16	2016-08-16	false	Premolars	8.03029	Trep1	M	Premolar
249	42	2001-01-22	Group1	2001-01-22	2001-02-12	1	#NULL!	#NULL!	0	0		extracted	2002-04-29	0	0	0	2013-07-18	79	M	3	1	2002-04-29	2002-04-29	false	Anterior	1.26491	Trep1	M	Anterior
250	16	2006-05-18	Group1	2006-05-18	2006-06-28	2	#NULL!	#NULL!	0	0		0	#NULL!	0	0	3	2014-07-03	34	M	0	0	2014-07-03	2014-07-03	false	Molars	8.12612	Trep1	M	Molar
251	42	2002-10-21	Group1	2002-10-21	2002-12-10	3	#NULL!	#NULL!	0	0		0	#NULL!	0	0	5	2016-05-27	58	M	0	0	2016-05-27	2016-05-27	false	Anterior	13.5992	Trep1	M	Anterior
251	44	2003-11-19	Group1	2003-11-19	2003-12-04	1	#NULL!	#NULL!	0	0		0	#NULL!	1	0	5	2016-05-27	59	M	0	0	2016-05-27	2016-05-27	false	Premolars	12.5205	VitE	M	Premolar
251	47	2003-12-16	Group1	2003-12-16	2004-02-18	3	#NULL!	#NULL!	0	0		0	#NULL!	2	0	5	2016-05-27	59	M	0	0	2016-05-27	2016-05-27	false	Molars	12.4465	VitE	M	Molar
251	13	2015-10-21	Group 3	2015-10-21	2015-11-25	1	#NULL!	#NULL!	0	0		0	#NULL!	3	0	1	2016-05-27	71	M	0	0	2016-05-27	2016-05-27	false	Anterior	0.599602	Trep1	M	Anterior
252	44	2011-11-21	Group 3	2011-11-21	2011-12-06	1	#NULL!	#NULL!	0	0		0	#NULL!	0	0	0	2014-11-25	75	M	0	0	2014-11-25	2014-11-25	false	Premolars	3.0117	VitE	M	Premolar
253	47	2015-09-17	Group 3	2015-09-17	2015-10-13	1	#NULL!	#NULL!	0	0		0	#NULL!	0	0	1	2016-08-29	58	W	0	0	2016-08-29	2016-08-29	false	Molars	0.950055	VitE	W	Molar
254	13	2000-12-19	Group1	2000-12-19	2001-04-02	3	#NULL!	#NULL!	0	0		0	#NULL!	0	0	5	2015-12-04	62	M	0	0	2015-12-04	2015-12-04	false	Anterior	14.9572	Trep1	M	Anterior
254	45	2001-03-05	Group1	2001-03-05	2001-03-05	0	#NULL!	#NULL!	0	0		0	#NULL!	1	0	5	2015-12-04	62	M	0	0	2015-12-04	2015-12-04	true	Premolars	14.7491	VitE	M	Premolar
254	44	2006-11-23	Group1	2006-11-23	2006-12-20	2	2008-04-16	1	0	root end surgery	WR	0	#NULL!	2	0	5	2015-12-04	68	M	2	1	2015-12-04	2008-04-16	false	Premolars	1.39633	VitE	M	Premolar
254	25	2015-03-02	Group 3	2015-03-02	2015-03-18	1	#NULL!	#NULL!	0	0		0	#NULL!	3	0	1	2015-12-04	76	M	0	0	2015-12-04	2015-12-04	false	Premolars	0.758401	VitE	M	Premolar
255	47	2001-05-15	Group1	2001-05-17	2002-02-19	5	#NULL!	#NULL!	0	0		0	#NULL!	0	0	0	2009-12-22	61	W	0	0	2009-12-22	2009-12-22	false	Molars	8.60525	Trep1	W	Molar
255	37	2001-10-04	Group1	2001-10-04	2002-04-25	6	#NULL!	#NULL!	0	0		0	#NULL!	1	0	0	2009-12-22	61	W	0	0	2009-12-22	2009-12-22	false	Molars	8.21647	Trep1	W	Molar
255	46	2004-01-09	Group1	2004-01-09	2004-02-04	2	#NULL!	#NULL!	0	0		extracted	2006-05-10	2	0	0	2009-12-22	63	W	3	1	2006-05-10	2006-05-10	false	Molars	2.3327	VitE	W	Molar
255	35	2005-10-28	Group1	2005-10-28	2005-12-22	2	#NULL!	#NULL!	0	0		0	#NULL!	3	0	0	2009-12-22	65	W	0	0	2009-12-22	2009-12-22	false	Premolars	4.15067	Trep1	W	Premolar
256	45	2004-02-09	Group1	2004-02-09	2004-02-11	1	#NULL!	#NULL!	0	0		0	#NULL!	0	0	9	2016-09-26	62	W	0	0	2016-09-26	2016-09-26	false	Premolars	12.63	Trep1	W	Premolar
256	44	2004-02-09	Group1	2004-02-09	2004-02-11	1	#NULL!	#NULL!	0	0		0	#NULL!	0	0	9	2016-09-26	62	W	0	0	2016-09-26	2016-09-26	false	Premolars	12.63	Trep1	W	Premolar
257	21	2004-08-04	Group1	2004-08-04	2004-08-25	1	#NULL!	#NULL!	0	0		0	#NULL!	0	0	0	2009-07-22	83	M	0	0	2009-07-22	2009-07-22	false	Anterior	4.96383	VitE	M	Anterior
257	37	2007-11-09	Group1	2007-11-09	2008-01-10	4	#NULL!	#NULL!	0	0		0	#NULL!	1	0	0	2009-07-22	86	M	0	0	2009-07-22	2009-07-22	false	Molars	1.70024	VitE	M	Molar
258	26	2002-05-15	Group1	2002-05-15	2002-05-29	1	#NULL!	#NULL!	0	0		0	#NULL!	0	0	0	2009-07-25	26	W	0	0	2009-07-25	2009-07-25	false	Molars	7.19523	VitE	W	Molar
258	15	2002-06-05	Group1	2002-06-05	2002-06-12	1	#NULL!	#NULL!	0	0		0	#NULL!	1	0	0	2009-07-25	26	W	0	0	2009-07-25	2009-07-25	false	Premolars	7.13773	VitE	W	Premolar
259	25	2006-07-17	Group1	2006-07-17	2006-08-09	2	2013-11-25	4	retreatment	0		extracted	2014-01-23	0	0	0	2014-03-31	26	W	3	1	2014-01-23	2013-11-25	false	Premolars	7.3595	Trep1	W	Premolar
259	16	2006-11-15	Group1	2006-11-15	2006-11-15	0	2013-02-26	2	retreatment	0		0	#NULL!	1	0	0	2014-03-31	26	W	1	1	2014-03-31	2013-02-26	true	Molars	6.28351	Trep1	W	Molar
260	43	2005-03-22	Group1	2005-03-22	2005-05-09	3	#NULL!	#NULL!	0	0		0	#NULL!	0	0	9	2016-07-29	62	W	0	0	2016-07-29	2016-07-29	false	Anterior	11.3541	Trep1	W	Anterior
260	32	2013-06-24	Group 3	2013-06-24	2013-06-24	0	#NULL!	#NULL!	0	0		0	#NULL!	1	0	5	2016-07-29	71	W	0	0	2016-07-29	2016-07-29	true	Anterior	3.09658	Trep1	W	Anterior
261	36	2014-12-03	Group 3	2014-12-03	2015-01-08	1	#NULL!	#NULL!	0	0		0	#NULL!	0	0	2	2016-08-29	52	W	0	0	2016-08-29	2016-08-29	false	Molars	1.73857	VitE	W	Molar
262	25	2002-09-05	Group1	2002-09-05	2002-10-02	1	#NULL!	#NULL!	0	0		0	#NULL!	0	0	0	2003-06-17	78	M	0	0	2003-06-17	2003-06-17	false	Premolars	0.780305	Trep1	M	Premolar
263	15	2008-01-10	Group1	2008-01-10	2008-01-29	1	2008-02-12	1	0	root end surgery	WR	0	#NULL!	0	0	6	2016-06-27	72	W	2	1	2016-06-27	2008-02-12	false	Premolars	0.0903511	Trep1	W	Premolar
263	36	2009-05-12	Group 2	2009-05-12	2009-07-14	2	#NULL!	#NULL!	0	0		0	#NULL!	1	1	6	2016-06-27	74	W	0	0	2016-06-27	2016-06-27	false	Molars	7.12678	Trep1	W	Molar
264	27	2008-04-23	Group1	2008-04-23	2008-05-19	2	#NULL!	#NULL!	0	0		0	#NULL!	0	0	6	2016-07-26	54	M	0	0	2016-07-26	2016-07-26	false	Molars	8.25754	VitE	M	Molar
264	26	2015-07-10	Group 3	2015-07-10	2015-08-12	1	#NULL!	#NULL!	0	0		0	#NULL!	1	0	1	2016-07-26	61	M	0	0	2016-07-26	2016-07-26	false	Molars	1.04588	Trep1	M	Molar
264	36	2016-07-19	Group 3	2016-07-19	2016-07-26	1	#NULL!	#NULL!	0	0		0	#NULL!	3	0	0	2016-07-26	62	M	0	0	2016-07-26	2016-07-26	false	Molars	0.0191654	VitE	M	Molar
265	22	2009-02-11	Group1	2009-02-11	2009-02-11	0	#NULL!	#NULL!	0	0		0	#NULL!	0	0	13	2016-07-14	50	W	0	0	2016-07-14	2016-07-14	true	Anterior	7.41974	Trep1	W	Anterior
266	26	2001-03-20	Group1	2001-03-20	2001-07-03	3	#NULL!	#NULL!	0	0		0	#NULL!	0	0	0	2009-10-15	59	W	0	0	2009-10-15	2009-10-15	false	Molars	8.5724	VitE	W	Molar
266	11	2009-03-25	Group1	2009-03-25	2009-04-06	1	#NULL!	#NULL!	0	0		0	#NULL!	2	0	0	2009-10-15	67	W	0	0	2009-10-15	2009-10-15	false	Anterior	0.558534	VitE	W	Anterior
267	26	2004-07-15	Group1	2004-07-15	2004-08-26	3	#NULL!	#NULL!	0	0		0	#NULL!	0	0	0	2005-02-05	46	M	0	0	2005-02-05	2005-02-05	false	Molars	0.561272	Trep1	M	Molar
268	22	2004-10-28	Group1	2004-10-28	2005-01-12	3	#NULL!	#NULL!	0	0		extracted	2005-08-24	0	0	0	2008-11-10	61	M	3	1	2005-08-24	2005-08-24	false	Anterior	0.821373	Trep1	M	Anterior
269	36	1999-10-21	Group1	1999-10-21	1999-11-23	2	#NULL!	#NULL!	0	0		extracted	2004-03-19	0	0	10	2016-05-23	55	W	3	1	2004-03-19	2004-03-19	false	Molars	4.41077	VitE	W	Molar
269	13	2001-09-11	Group1	2016-02-01	2001-11-14	4	2016-02-01	5	0	root end surgery	WR	0	#NULL!	2	0	11	2016-05-23	57	W	2	1	2016-05-23	2016-02-01	false	Anterior	14.3905	VitE	W	Anterior
270	12	2001-10-17	Group1	2001-10-17	2002-01-07	3	#NULL!	#NULL!	0	0		extracted	2011-08-31	0	0	0	2011-10-13	68	W	3	1	2011-08-31	2011-08-31	false	Anterior	9.87017	Trep1	W	Anterior
270	46	2003-02-03	Group1	2003-02-03	2003-02-26	2	#NULL!	#NULL!	0	0		0	#NULL!	1	0	0	2011-10-13	69	W	0	0	2011-10-13	2011-10-13	false	Molars	8.69013	VitE	W	Molar
270	22	2003-12-15	Group1	2003-12-15	2004-01-20	2	#NULL!	#NULL!	0	0		0	#NULL!	2	0	0	2011-10-13	70	W	0	0	2011-10-13	2011-10-13	false	Anterior	7.82769	VitE	W	Anterior
270	47	2005-09-13	Group1	2005-09-13	2005-10-24	1	#NULL!	#NULL!	0	0		0	#NULL!	3	0	0	2011-10-13	72	W	0	0	2011-10-13	2011-10-13	false	Molars	6.0809	VitE	W	Molar
270	17	2007-11-22	Group1	2007-11-22	2007-12-12	2	#NULL!	#NULL!	0	0		extracted	2011-08-31	4	0	0	2011-10-13	74	W	3	1	2011-08-31	2011-08-31	false	Molars	3.77284	VitE	W	Molar
270	45	2008-09-17	Group1	2008-09-17	2008-10-13	1	#NULL!	#NULL!	0	0		extracted	2011-10-10	8	0	0	2011-10-13	75	W	3	1	2011-10-10	2011-10-10	false	Premolars	3.06098	VitE	W	Premolar
270	26	2011-09-07	Group 2	2011-09-07	2011-09-19	1	#NULL!	#NULL!	0	0		0	#NULL!	9	0	0	2011-10-13	78	W	0	0	2011-10-13	2011-10-13	false	Molars	0.0985648	VitE	W	Molar
271	25	2004-07-13	Group1	2004-07-13	2004-09-13	3	#NULL!	#NULL!	0	0		extracted	2006-06-07	0	0	0	2007-03-30	60	W	3	1	2006-06-07	2006-06-07	false	Premolars	1.90011	Trep1	W	Premolar
272	21	2005-10-17	Group1	2005-10-17	2005-10-17	0	#NULL!	#NULL!	0	0		0	#NULL!	0	0	1	2014-01-07	73	M	0	0	2014-01-07	2014-01-07	true	Anterior	8.22468	VitE	M	Anterior
272	43	2007-01-30	Group1	2007-01-30	2007-02-14	1	#NULL!	#NULL!	0	0		extracted	2012-01-19	1	0	0	2014-01-07	74	M	3	1	2012-01-19	2012-01-19	false	Anterior	4.96931	Trep1	M	Anterior
273	22	2011-11-15	Group 3	2011-11-15	2012-01-09	2	#NULL!	#NULL!	0	0		0	#NULL!	0	0	3	2016-07-27	48	M	0	0	2016-07-27	2016-07-27	false	Anterior	4.69825	VitE	M	Anterior
274	33	1999-08-31	Group1	1999-08-31	1999-11-11	2	2000-01-24	1	0	root end surgery	WR	0	#NULL!	0	0	0	2006-08-14	80	M	2	1	2006-08-14	2000-01-24	false	Anterior	0.399735	Trep1	M	Anterior
275	38	2003-04-17	Group1	2003-04-17	2003-06-30	3	#NULL!	#NULL!	0	0		0	#NULL!	0	0	0	2015-12-16	46	W	0	0	2015-12-16	2015-12-16	false	Molars	12.6656	VitE	W	Molar
275	37	2003-05-07	Group1	2003-05-07	2003-06-12	2	#NULL!	#NULL!	0	0		0	#NULL!	1	0	0	2015-12-16	46	W	0	0	2015-12-16	2015-12-16	false	Molars	12.6108	VitE	W	Molar
275	35	2003-05-07	Group1	2003-05-07	2003-07-10	5	#NULL!	#NULL!	0	0		0	#NULL!	1	0	0	2015-12-16	46	W	0	0	2015-12-16	2015-12-16	false	Premolars	12.6108	VitE	W	Premolar
275	14	2008-05-16	Group1	2008-05-16	2008-08-13	4	#NULL!	#NULL!	0	0		0	#NULL!	3	0	0	2015-12-16	51	W	0	0	2015-12-16	2015-12-16	false	Premolars	7.58401	VitE	W	Premolar
276	45	2002-07-15	Group1	2002-07-15	2002-08-07	2	#NULL!	#NULL!	0	0		0	#NULL!	0	0	0	2016-09-26	49	W	0	0	2016-09-26	2016-09-26	false	Premolars	14.2015	Trep1	W	Premolar
277	24	2013-08-26	Group 3	2013-08-26	2013-08-29	1	#NULL!	#NULL!	0	0		0	#NULL!	0	0	1	2016-02-03	60	M	0	0	2016-02-03	2016-02-03	false	Premolars	2.43948	Trep1	M	Premolar
278	32	2002-08-20	Group1	2002-08-20	2002-10-09	6	#NULL!	#NULL!	0	0		extracted	2013-11-05	0	0	0	2016-09-13	68	M	3	1	2013-11-05	2013-11-05	false	Anterior	11.2117	Trep1	M	Anterior
279	45	2006-08-21	Group1	2006-08-21	2006-10-09	1	#NULL!	#NULL!	0	0		0	#NULL!	0	0	0	2010-05-31	67	W	0	0	2010-05-31	2010-05-31	false	Premolars	3.77558	Trep1	W	Premolar
280	46	2011-08-29	Group 2	2011-08-29	2011-09-12	2	#NULL!	#NULL!	0	0		extracted	2015-09-22	0	0	9	2016-08-29	53	M	3	1	2015-09-22	2015-09-22	false	Molars	4.0658	VitE	M	Molar
281	34	2012-11-12	Group 3	2012-11-12	2012-12-06	1	#NULL!	#NULL!	0	0		extracted	2013-04-10	0	0	1	2014-10-21	60	M	3	1	2013-04-10	2013-04-10	false	Premolars	0.407949	Trep1	M	Premolar
282	12	2009-03-30	Group 2	2009-03-30	2009-05-06	0	#NULL!	#NULL!	0	0		0	#NULL!	0	0	0	2009-07-07	17	W	0	0	2009-07-07	2009-07-07	false	Anterior	0.271053	Trep1	W	Anterior
283	45	2008-12-12	Group1	2008-12-12	2009-03-05	2	#NULL!	#NULL!	0	0		0	#NULL!	0	0	7	2016-07-13	58	W	0	0	2016-07-13	2016-07-13	false	Premolars	7.58401	VitE	W	Premolar
283	34	2011-12-05	Group 3	2011-12-05	2012-01-17	2	#NULL!	#NULL!	0	0		0	#NULL!	1	0	7	2016-07-13	61	W	0	0	2016-07-13	2016-07-13	false	Premolars	4.60517	Trep1	W	Premolar
284	46	2012-12-20	Group 3	2012-12-20	2013-01-07	1	#NULL!	#NULL!	0	0		0	#NULL!	0	0	4	2015-08-31	60	M	0	0	2015-08-31	2015-08-31	false	Molars	2.6941	Trep1	M	Molar
285	16	2002-06-17	Group1	2002-06-17	2002-07-04	3	#NULL!	#NULL!	0	0		0	#NULL!	2	0	0	2005-06-22	38	W	0	0	2005-06-22	2005-06-22	false	Molars	3.01444	Trep1	W	Molar
285	36	2005-05-02	Group1	2005-05-02	2005-06-22	2	#NULL!	#NULL!	0	0		0	#NULL!	3	0	0	2005-06-22	40	W	0	0	2005-06-22	2005-06-22	false	Molars	0.139633	Trep1	W	Molar
286	43	2002-01-23	Group1	2002-01-23	2002-02-04	2	#NULL!	#NULL!	0	0		extracted	2009-12-09	0	0	0	2010-01-20	48	M	3	1	2009-12-09	2009-12-09	false	Anterior	7.87697	Trep1	M	Anterior
286	33	2002-01-23	Group1	2002-01-23	2002-02-04	2	#NULL!	#NULL!	0	0		extracted	2009-12-09	0	0	0	2010-01-20	48	M	3	1	2009-12-09	2009-12-09	false	Anterior	7.87697	Trep1	M	Anterior
287	22	2005-08-09	Group1	2005-08-09	2005-08-16	1	#NULL!	#NULL!	0	0		0	#NULL!	0	0	0	2016-08-17	55	M	0	0	2016-08-17	2016-08-17	false	Anterior	11.0228	VitE	M	Anterior
288	23	2003-08-12	Group1	2003-08-12	2003-09-23	3	#NULL!	#NULL!	0	0		0	#NULL!	0	0	0	2011-02-14	70	M	0	0	2011-02-14	2011-02-14	false	Anterior	7.51009	Trep1	M	Anterior
288	28	2004-07-29	Group1	2004-07-29	2004-08-09	1	#NULL!	#NULL!	0	0		0	#NULL!	1	0	0	2011-02-14	71	M	0	0	2011-02-14	2011-02-14	false	Molars	6.54634	VitE	M	Molar
289	17	2016-03-01	Group 3	2016-03-01	2016-03-10	1	#NULL!	#NULL!	0	0		0	#NULL!	0	0	0	2016-07-26	73	W	0	0	2016-07-26	2016-07-26	false	Molars	0.402473	VitE	W	Molar
290	37	2000-12-18	Group1	2000-12-18	2001-02-12	3	#NULL!	#NULL!	0	0		extracted	2009-07-02	0	0	0	2016-09-07	67	W	3	1	2009-07-02	2009-07-02	false	Molars	8.53681	VitE	W	Molar
290	24	2003-01-24	Group1	2003-01-24	2003-04-03	2	#NULL!	#NULL!	0	0		extracted	2006-05-10	2	0	0	2016-09-07	69	W	3	1	2006-05-10	2006-05-10	false	Premolars	3.29097	VitE	W	Premolar
290	12	2004-09-06	Group1	2004-09-06	2004-09-22	1	#NULL!	#NULL!	0	0		extracted	2011-05-24	5	0	0	2016-09-07	70	W	3	1	2011-05-24	2011-05-24	false	Anterior	6.71062	Trep1	W	Anterior
290	45	2004-10-19	Group1	2004-10-19	2004-11-24	1	#NULL!	#NULL!	0	0		extracted	2010-05-25	6	0	5	2016-09-07	70	W	3	1	2010-05-25	2010-05-25	false	Premolars	5.59629	Trep1	W	Premolar
290	13	2006-11-15	Group1	2006-11-15	2006-12-13	2	#NULL!	#NULL!	0	0		extracted	2008-01-22	8	0	0	2016-09-07	72	W	3	1	2008-01-22	2008-01-22	false	Anterior	1.18552	Trep1	W	Anterior
290	22	2008-02-06	Group1	2008-02-06	2008-03-27	4	#NULL!	#NULL!	0	0		0	#NULL!	9	0	5	2016-09-07	74	W	0	0	2016-09-07	2016-09-07	false	Anterior	8.58609	Trep1	W	Anterior
291	31	1999-11-15	Group1	1999-11-15	2003-02-12	4	#NULL!	#NULL!	0	0		0	#NULL!	0	0	0	2010-12-15	54	M	0	0	2010-12-15	2010-12-15	false	Anterior	11.0831	Trep1	M	Anterior
291	33	2008-01-25	Group1	2008-01-25	2008-02-25	1	#NULL!	#NULL!	0	0		0	#NULL!	6	0	0	2010-12-15	62	M	0	0	2010-12-15	2010-12-15	false	Anterior	2.8885	VitE	M	Anterior
292	45	2008-03-31	Group1	2008-03-31	2008-04-09	1	#NULL!	#NULL!	0	0		0	#NULL!	0	0	0	2014-03-10	28	W	0	0	2014-03-10	2014-03-10	false	Premolars	5.94127	VitE	W	Premolar
293	37	2003-12-18	Group1	2003-12-18	2004-02-17	5	#NULL!	#NULL!	0	0		extracted	2010-02-22	0	0	0	2016-03-16	54	M	3	1	2010-02-22	2010-02-22	false	Molars	6.1822	VitE	M	Molar
293	14	2004-04-05	Group1	2004-04-05	2004-04-27	2	#NULL!	#NULL!	0	0		0	#NULL!	2	0	4	2016-03-16	54	M	0	0	2016-03-16	2016-03-16	false	Premolars	11.9455	VitE	M	Premolar
293	36	2008-01-07	Group1	#NULL!	2008-03-06	1	#NULL!	#NULL!	0	0		0	#NULL!	3	0	4	2016-03-16	58	M	0	0	2016-03-16	2016-03-16	false	Molars	8.18909	Trep1	M	Molar
293	22	2008-01-31	Group1	2008-01-31	2008-03-06	1	#NULL!	#NULL!	0	0		0	#NULL!	3	0	4	2016-03-16	58	M	0	0	2016-03-16	2016-03-16	false	Anterior	8.12338	Trep1	M	Anterior
294	37	2007-07-05	Group1	2007-07-05	2007-11-15	2	#NULL!	#NULL!	0	0		extracted	2011-02-14	0	0	0	2011-11-02	26	M	3	1	2011-02-14	2011-02-14	false	Molars	3.61404	Trep1	M	Molar
294	15	2007-12-06	Group1	2007-12-06	2008-10-13	3	#NULL!	#NULL!	0	0		0	#NULL!	2	0	0	2011-11-02	27	M	0	0	2011-11-02	2011-11-02	false	Premolars	3.907	Trep1	M	Premolar
295	13	2003-05-26	Group1	2003-05-26	2003-06-18	1	#NULL!	#NULL!	0	0		extracted	2004-11-24	0	0	0	2011-10-18	81	W	3	1	2004-11-24	2004-11-24	false	Anterior	1.50038	Trep1	W	Anterior
296	27	1999-04-14	Group1	1999-04-14	1999-07-12	4	#NULL!	#NULL!	0	0		0	#NULL!	0	0	0	2003-12-29	20	W	0	0	2003-12-29	2003-12-29	false	Molars	4.70921	VitE	W	Molar
297	23	2010-11-18	Group1	2010-11-18	2010-11-18	0	#NULL!	#NULL!	0	0		0	#NULL!	0	0	0	2016-09-06	69	M	0	0	2016-09-06	2016-09-06	true	Anterior	5.80163	VitE	M	Anterior
298	36	2010-11-10	Group 2	2010-11-10	2010-12-06	1	#NULL!	#NULL!	0	0		0	#NULL!	0	0	2	2016-06-06	47	W	0	0	2016-06-06	2016-06-06	false	Molars	5.57165	Trep1	W	Molar
299	44	2001-03-26	Group1	2001-03-26	2001-06-28	2	2001-07-03	2	retreatment	0		0	#NULL!	0	0	0	2013-10-08	71	W	1	1	2013-10-08	2001-07-03	false	Premolars	0.271053	Trep1	W	Premolar
300	26	2000-08-11	Group1	2000-08-11	2000-12-14	5	2009-02-05	5	retreatment	0		0	#NULL!	0	0	4	2016-07-04	31	M	1	1	2016-07-04	2009-02-05	false	Molars	8.48752	VitE	M	Molar
300	25	2006-06-02	Group1	2006-06-02	2006-06-19	1	2010-11-17	2	retreatment	0		0	#NULL!	2	0	2	2016-07-04	37	M	1	1	2016-07-04	2010-11-17	false	Premolars	4.46006	VitE	M	Premolar
300	24	2015-06-11	Group 3	2015-06-11	2015-07-02	1	#NULL!	#NULL!	0	0		0	#NULL!	6	0	0	2016-07-04	46	M	0	0	2016-07-04	2016-07-04	false	Premolars	1.06505	VitE	M	Premolar
301	23	2004-11-22	Group1	2004-11-22	2004-11-24	1	#NULL!	#NULL!	0	0		extracted	2005-05-11	0	0	0	2005-07-21	91	M	3	1	2005-05-11	2005-05-11	false	Anterior	0.465445	Trep1	M	Anterior
302	13	2001-09-05	Group1	2001-09-05	2001-09-26	2	#NULL!	#NULL!	0	0		extracted	2007-06-06	0	0	0	2007-12-13	73	W	3	1	2007-06-06	2007-06-06	false	Anterior	5.74961	VitE	W	Anterior
302	11	2006-06-14	Group1	2006-06-14	2006-06-26	1	#NULL!	#NULL!	0	0		0	#NULL!	1	0	0	2007-12-13	78	W	0	0	2007-12-13	2007-12-13	false	Anterior	1.49764	VitE	W	Anterior
302	21	2007-12-03	Group1	2007-12-03	2007-12-03	0	#NULL!	#NULL!	0	0		0	#NULL!	2	0	0	2007-12-13	79	W	0	0	2007-12-13	2007-12-13	true	Anterior	0.0273791	VitE	W	Anterior
303	35	2000-12-18	Group1	2000-12-18	2000-12-18	0	#NULL!	#NULL!	0	0		extracted	2006-09-04	1	0	0	2012-04-04	85	W	3	1	2006-09-04	2006-09-04	true	Premolars	5.71128	VitE	W	Premolar
303	23	2010-03-31	Group1	2010-03-31	2010-05-05	1	#NULL!	#NULL!	0	0		extracted	2012-03-28	3	0	0	2012-04-04	94	W	3	1	2012-03-28	2012-03-28	false	Anterior	1.9932	Trep1	W	Anterior
304	27	1999-06-02	Group1	1999-06-02	1999-06-30	2	#NULL!	#NULL!	0	0		0	#NULL!	0	0	13	2016-09-08	61	W	0	0	2016-09-08	2016-09-08	false	Molars	17.2707	Trep1	W	Molar
304	26	1999-06-02	Group1	1999-06-02	1999-06-30	2	#NULL!	#NULL!	0	0		0	#NULL!	0	0	13	2016-09-08	61	W	0	0	2016-09-08	2016-09-08	false	Molars	17.2707	Trep1	W	Molar
305	33	2010-05-05	Group 2	2010-05-05	2010-05-05	0	#NULL!	#NULL!	0	0		0	#NULL!	1	0	8	2016-09-14	69	W	0	0	2016-09-14	2016-09-14	true	Anterior	6.3629	Trep1	W	Anterior
305	38	2011-09-08	Group 2	2011-09-08	2011-10-11	2	#NULL!	#NULL!	0	0		0	#NULL!	2	0	8	2016-09-14	71	W	0	0	2016-09-14	2016-09-14	false	Molars	5.01859	VitE	W	Molar
306	46	2000-12-04	Group1	2000-12-04	2001-01-08	1	#NULL!	#NULL!	0	0		0	#NULL!	0	0	1	2012-03-08	73	M	0	0	2012-03-08	2012-03-08	false	Molars	11.2583	Trep1	M	Molar
306	23	2002-03-18	Group1	2002-03-18	2002-04-17	1	#NULL!	#NULL!	0	0		extracted	2002-08-07	2	0	0	2012-03-08	74	M	3	1	2002-08-07	2002-08-07	false	Anterior	0.388783	Trep1	M	Anterior
307	37	2005-05-02	Group1	2005-05-02	2005-05-23	1	#NULL!	#NULL!	0	0		0	#NULL!	2	0	0	2005-10-31	74	W	0	0	2005-10-31	2005-10-31	false	Molars	0.4983	VitE	W	Molar
308	47	2000-04-13	Group1	2000-04-13	2000-05-29	1	#NULL!	#NULL!	0	0		0	#NULL!	0	0	0	2003-01-02	26	W	0	0	2003-01-02	2003-01-02	false	Molars	2.72148	VitE	W	Molar
309	36	2011-07-25	Group 2	2011-07-25	2011-08-09	1	#NULL!	#NULL!	0	0		extracted	2016-08-11	0	0	4	2016-09-08	51	W	3	1	2016-08-11	2016-08-11	false	Molars	5.04871	VitE	W	Molar
310	43	2006-05-16	Group1	2006-05-16	2006-07-04	3	#NULL!	#NULL!	0	0		0	#NULL!	0	0	0	2016-03-01	67	W	0	0	2016-03-01	2016-03-01	false	Anterior	9.79351	Trep1	W	Anterior
310	42	2006-05-16	Group1	2006-05-16	2006-07-04	2	#NULL!	#NULL!	0	0		0	#NULL!	0	0	0	2016-03-01	67	W	0	0	2016-03-01	2016-03-01	false	Anterior	9.79351	Trep1	W	Anterior
310	45	2012-02-09	Group 3	2012-02-09	2012-02-09	0	#NULL!	#NULL!	0	0		0	#NULL!	2	0	0	2016-03-01	73	W	0	0	2016-03-01	2016-03-01	true	Premolars	4.05758	Trep1	W	Premolar
311	25	2006-05-11	Group1	2006-05-11	2006-08-15	2	#NULL!	#NULL!	0	0		0	#NULL!	0	0	0	2008-10-16	22	W	0	0	2008-10-16	2008-10-16	false	Premolars	2.434	Trep1	W	Premolar
311	14	2006-06-28	Group1	2006-06-28	2006-10-23	3	#NULL!	#NULL!	0	0		0	#NULL!	1	0	0	2008-10-16	22	W	0	0	2008-10-16	2008-10-16	false	Premolars	2.30258	Trep1	W	Premolar
312	22	2005-03-14	Group1	2005-03-14	2005-04-25	1	#NULL!	#NULL!	0	0		0	#NULL!	0	0	3	2013-04-15	70	W	0	0	2013-04-15	2013-04-15	false	Anterior	8.08779	Trep1	W	Anterior
313	14	2004-09-08	Group1	2004-09-08	2004-10-19	2	#NULL!	#NULL!	0	0		extracted	2008-02-11	0	0	0	2009-12-22	69	M	3	1	2008-02-11	2008-02-11	false	Premolars	3.42513	Trep1	M	Premolar
313	24	2004-12-21	Group1	2004-12-21	2005-01-31	2	2006-02-14	1	0	root end surgery	WR	extracted	2008-05-20	1	0	0	2009-12-22	69	M	3	1	2008-05-20	2006-02-14	false	Premolars	1.14992	Trep1	M	Premolar
313	21	2005-03-09	Group1	2005-03-09	2005-03-09	0	#NULL!	#NULL!	0	0		0	#NULL!	2	0	0	2009-12-22	70	M	0	0	2009-12-22	2009-12-22	true	Anterior	4.78861	VitE	M	Anterior
313	15	2005-04-11	Group1	2005-04-11	2005-04-11	0	#NULL!	#NULL!	0	0		0	#NULL!	3	0	0	2009-12-22	70	M	0	0	2009-12-22	2009-12-22	true	Premolars	4.69825	VitE	M	Premolar
313	35	2009-06-24	Group 2	2009-07-06	2009-08-27	2	#NULL!	#NULL!	0	0		0	#NULL!	4	1	0	2009-12-22	74	M	0	0	2009-12-22	2009-12-22	false	Premolars	0.495562	VitE	M	Premolar
314	47	2006-07-13	Group1	2006-07-13	2006-08-01	1	#NULL!	#NULL!	0	0		0	#NULL!	0	0	0	2007-12-18	61	W	0	0	2007-12-18	2007-12-18	false	Molars	1.43193	Trep1	W	Molar
315	16	2004-09-20	Group1	2004-09-20	2004-10-12	3	2016-03-02	5	retreatment	0		0	#NULL!	1	0	2	2016-09-26	54	W	1	1	2016-09-26	2016-03-02	false	Molars	11.4472	Trep1	W	Molar
316	24	2008-11-18	Group1	2008-11-18	2008-11-18	0	#NULL!	#NULL!	0	0		0	#NULL!	0	0	8	2016-09-13	75	W	0	0	2016-09-13	2016-09-13	true	Premolars	7.81947	Trep1	W	Premolar
317	23	1999-03-19	Group1	1999-03-19	1999-03-29	1	2002-02-18	4	0	root end surgery	WR	extracted	2002-03-21	0	0	0	2006-12-20	57	M	3	1	2002-03-21	2002-02-18	false	Anterior	2.92135	Trep1	M	Anterior
317	25	2000-05-02	Group1	2000-05-02	2000-05-02	0	#NULL!	#NULL!	0	0		extracted	2002-03-21	1	1	0	2006-12-20	58	M	3	1	2002-03-21	2002-03-21	true	Premolars	1.88368	Trep1	M	Premolar
317	37	2005-05-27	Group1	2005-06-22	2005-07-19	1	2006-12-14	1	0	root end surgery	WR	0	#NULL!	3	3	0	2006-12-20	63	M	2	1	2006-12-20	2006-12-14	false	Molars	1.54966	Trep1	M	Molar
318	45	2009-05-18	Group 2	2009-05-18	2009-07-01	2	#NULL!	#NULL!	0	0		0	#NULL!	0	0	0	2016-08-24	41	M	0	0	2016-08-24	2016-08-24	false	Premolars	7.26915	VitE	M	Premolar
319	11	2002-07-02	Group1	#NULL!	2002-07-10	0	#NULL!	#NULL!	0	0		0	#NULL!	0	0	0	2005-08-16	68	M	0	0	2005-08-16	2005-08-16	false	Anterior	3.12396	Trep1	M	Anterior
319	44	2002-12-16	Group1	2002-12-16	2003-01-14	1	#NULL!	#NULL!	0	0		extracted	2005-06-21	2	0	0	2005-08-16	68	M	3	1	2005-06-21	2005-06-21	false	Premolars	2.5134	Trep1	M	Premolar
320	47	2003-05-20	Group1	2003-05-20	2003-10-30	5	#NULL!	#NULL!	0	0		extracted	2004-04-06	0	0	0	2016-09-21	58	W	3	1	2004-04-06	2004-04-06	false	Molars	0.881607	VitE	W	Molar
320	45	2006-09-20	Group1	2006-09-20	2006-10-25	2	#NULL!	#NULL!	0	0		extracted	2010-09-09	1	0	8	2016-09-21	62	W	3	1	2010-09-09	2010-09-09	false	Premolars	3.96997	Trep1	W	Premolar
320	14	2009-06-26	Group 2	2009-06-26	2009-08-26	2	#NULL!	#NULL!	0	0		extracted	2011-03-10	2	0	8	2016-09-21	65	W	3	1	2011-03-10	2011-03-10	false	Premolars	1.70298	Trep1	W	Premolar
321	14	2001-02-05	Group1	2001-02-05	2001-04-11	3	#NULL!	#NULL!	0	0		0	#NULL!	0	0	6	2016-07-06	51	W	0	0	2016-07-06	2016-07-06	false	Premolars	15.4144	Trep1	W	Premolar
321	13	2001-11-07	Group1	2001-11-07	2001-11-21	1	#NULL!	#NULL!	0	0		0	#NULL!	1	0	6	2016-07-06	51	W	0	0	2016-07-06	2016-07-06	false	Anterior	14.6615	Trep1	W	Anterior
322	46	2008-04-15	Group1	2008-04-15	2008-05-06	1	#NULL!	#NULL!	0	0		0	#NULL!	3	0	0	2011-04-06	50	M	0	0	2011-04-06	2011-04-06	false	Molars	2.97337	VitE	M	Molar
323	13	2003-04-23	Group1	2003-04-23	2003-05-20	1	#NULL!	#NULL!	0	0		0	#NULL!	0	0	3	2016-09-12	55	M	0	0	2016-09-12	2016-09-12	false	Anterior	13.3911	Trep1	M	Anterior
324	13	2003-01-07	Group1	2003-01-07	2003-02-10	3	#NULL!	#NULL!	0	0		0	#NULL!	0	0	0	2015-12-04	52	W	0	0	2015-12-04	2015-12-04	false	Anterior	12.9065	Trep1	W	Anterior
324	12	2003-02-10	Group1	2003-02-10	2003-02-24	3	#NULL!	#NULL!	0	0		0	#NULL!	2	0	0	2015-12-04	52	W	0	0	2015-12-04	2015-12-04	false	Anterior	12.8134	Trep1	W	Anterior
324	45	2008-01-10	Group1	2008-01-10	2008-01-10	0	#NULL!	#NULL!	0	0		0	#NULL!	3	0	0	2015-12-04	57	W	0	0	2015-12-04	2015-12-04	true	Premolars	7.89887	VitE	W	Premolar
324	34	2013-08-13	Group 3	2013-08-13	2013-08-13	0	#NULL!	#NULL!	0	0		0	#NULL!	4	0	0	2015-12-04	63	W	0	0	2015-12-04	2015-12-04	true	Premolars	2.30806	Trep1	W	Premolar
324	33	2013-08-20	Group 3	2013-08-20	2013-10-01	1	#NULL!	#NULL!	0	0		0	#NULL!	5	0	0	2015-12-04	63	W	0	0	2015-12-04	2015-12-04	false	Anterior	2.28889	VitE	W	Anterior
325	13	2007-03-13	Group1	2007-03-13	2007-03-22	1	#NULL!	#NULL!	0	0		0	#NULL!	0	0	0	2014-09-01	69	W	0	0	2014-09-01	2014-09-01	false	Anterior	7.47176	VitE	W	Anterior
325	36	2008-02-08	Group1	2008-02-08	2008-02-14	1	#NULL!	#NULL!	0	0		0	#NULL!	1	0	0	2014-09-01	70	W	0	0	2014-09-01	2014-09-01	false	Molars	6.56277	VitE	W	Molar
326	35	2002-07-15	Group1	2002-07-15	2002-07-31	1	#NULL!	#NULL!	0	0		extracted	2006-04-12	3	1	0	2016-05-10	57	M	3	1	2006-04-12	2006-04-12	false	Premolars	3.74272	Trep1	M	Premolar
326	14	2016-02-04	Group 3	2016-02-04	2016-03-07	1	#NULL!	#NULL!	0	0		0	#NULL!	4	1	0	2016-05-10	70	M	0	0	2016-05-10	2016-05-10	false	Premolars	0.262839	VitE	M	Premolar
326	22	2016-04-21	Group 3	2016-04-21	2016-04-21	0	#NULL!	#NULL!	0	0		0	#NULL!	5	1	0	2016-05-10	71	M	0	0	2016-05-10	2016-05-10	true	Anterior	0.0520203	VitE	M	Anterior
327	27	2002-02-04	Group1	2002-02-04	2002-02-13	1	#NULL!	#NULL!	0	0		0	#NULL!	0	0	0	2003-02-03	53	M	0	0	2003-02-03	2003-02-03	false	Molars	0.9966	VitE	M	Molar
328	16	2004-11-26	Group1	2004-11-26	2005-02-21	2	2005-08-11	7	0	root end surgery	WR	extracted	2007-04-03	2	0	0	2014-09-16	65	W	3	1	2007-04-03	2005-08-11	false	Molars	0.706381	Trep1	W	Molar
328	23	2005-09-26	Group1	2005-09-26	2005-11-09	2	#NULL!	#NULL!	0	0		extracted	2012-02-09	5	2	0	2014-09-16	66	W	3	1	2012-02-09	2012-02-09	false	Anterior	6.37112	VitE	W	Anterior
328	34	2006-04-03	Group1	2006-04-03	2006-04-03	0	#NULL!	#NULL!	0	0		0	#NULL!	6	2	0	2014-09-16	66	W	0	0	2014-09-16	2014-09-16	true	Premolars	8.45467	VitE	W	Premolar
328	26	2010-01-26	Group1	2010-01-26	2010-01-26	0	#NULL!	#NULL!	0	0		0	#NULL!	7	2	0	2014-09-16	70	W	0	0	2014-09-16	2014-09-16	true	Molars	4.63802	VitE	W	Molar
328	12	2012-11-15	Group 3	2012-11-15	2012-11-27	1	#NULL!	#NULL!	0	0		0	#NULL!	8	2	0	2014-09-16	73	W	0	0	2014-09-16	2014-09-16	false	Anterior	1.8344	VitE	W	Anterior
328	43	2012-12-17	Group 3	2012-12-17	2013-03-07	3	#NULL!	#NULL!	0	0		0	#NULL!	9	2	0	2014-09-16	73	W	0	0	2014-09-16	2014-09-16	false	Anterior	1.74679	VitE	W	Anterior
329	27	1999-08-23	Group1	1999-08-23	1999-09-27	2	#NULL!	#NULL!	0	0		0	#NULL!	0	0	3	2016-07-25	47	W	0	0	2016-07-25	2016-07-25	false	Molars	16.923	Trep1	W	Molar
329	46	2000-03-24	Group1	2000-03-24	2000-07-27	5	#NULL!	#NULL!	0	0		0	#NULL!	2	0	3	2016-07-25	48	W	0	0	2016-07-25	2016-07-25	false	Molars	16.3371	VitE	W	Molar
330	43	2000-07-04	Group1	2000-07-04	2000-10-02	3	#NULL!	#NULL!	0	0		0	#NULL!	0	0	0	2004-11-25	69	W	0	0	2004-11-25	2004-11-25	false	Anterior	4.39435	Trep1	W	Anterior
331	16	2009-07-24	Group 2	2009-07-24	2009-09-09	1	#NULL!	#NULL!	0	0		0	#NULL!	0	0	0	2015-09-02	38	M	0	0	2015-09-02	2015-09-02	false	Molars	6.10828	VitE	M	Molar
332	15	2000-03-13	Group1	2000-03-13	2004-06-02	9	#NULL!	#NULL!	0	0		0	#NULL!	0	0	0	2004-09-06	24	M	0	0	2004-09-06	2004-09-06	false	Premolars	4.4847	Trep1	M	Premolar
333	43	2008-05-28	Group1	2008-05-28	2008-06-18	1	#NULL!	#NULL!	0	0		0	#NULL!	0	0	5	2016-06-24	69	M	0	0	2016-06-24	2016-06-24	false	Anterior	8.0741	Trep1	M	Anterior
334	23	2003-06-10	Group1	2003-06-10	2003-06-13	1	#NULL!	#NULL!	0	0		0	#NULL!	0	0	0	2006-12-14	67	W	0	0	2006-12-14	2006-12-14	false	Anterior	3.51274	VitE	W	Anterior
335	15	2007-06-12	Group1	2007-06-12	2007-06-12	0	#NULL!	#NULL!	0	0		0	#NULL!	0	0	2	2012-07-26	54	M	0	0	2012-07-26	2012-07-26	true	Premolars	5.12263	VitE	M	Premolar
336	46	2012-10-29	Group 3	2012-10-29	2012-11-28	1	#NULL!	#NULL!	0	0		0	#NULL!	0	0	5	2016-07-22	70	W	0	0	2016-07-22	2016-07-22	false	Molars	3.72903	Trep1	W	Molar
336	37	2013-06-20	Group 3	2013-06-20	2013-07-02	1	#NULL!	#NULL!	0	0		0	#NULL!	1	0	4	2016-07-22	71	W	0	0	2016-07-22	2016-07-22	false	Molars	3.08836	Trep1	W	Molar
337	12	1999-07-14	Group1	1999-07-14	1999-08-04	1	#NULL!	#NULL!	0	0		0	#NULL!	0	0	0	2004-12-02	72	M	0	0	2004-12-02	2004-12-02	false	Anterior	5.38821	Trep1	M	Anterior
337	34	1999-11-03	Group1	1999-11-03	1999-11-03	0	#NULL!	#NULL!	0	0		0	#NULL!	2	0	0	2004-12-02	72	M	0	0	2004-12-02	2004-12-02	true	Premolars	5.08156	VitE	M	Premolar
338	44	2004-02-26	Group1	2004-02-26	2004-03-16	1	#NULL!	#NULL!	0	0		extracted	2005-11-30	0	0	0	2015-10-21	57	W	3	1	2005-11-30	2005-11-30	false	Premolars	1.76048	Trep1	W	Premolar
338	34	2005-05-02	Group1	2005-05-02	2005-08-15	4	#NULL!	#NULL!	0	0		extracted	2005-11-30	1	0	0	2015-10-21	58	W	3	1	2005-11-30	2005-11-30	false	Premolars	0.580437	Trep1	W	Premolar
339	47	1999-09-20	Group1	1999-09-20	1999-11-03	3	2010-04-12	5	retreatment	0		extracted	2014-10-21	0	0	2	2016-07-20	50	W	3	1	2014-10-21	2010-04-12	false	Molars	10.5601	Trep1	W	Molar
340	48	2003-12-15	Group1	2003-12-15	2004-01-12	1	#NULL!	#NULL!	0	0		extracted	2008-09-18	0	0	0	2008-10-27	53	M	3	1	2008-09-18	2008-09-18	false	Molars	4.76123	VitE	M	Molar
340	33	2004-04-19	Group1	2004-04-19	2004-05-04	1	#NULL!	#NULL!	0	0		0	#NULL!	2	0	0	2008-10-27	53	M	0	0	2008-10-27	2008-10-27	false	Anterior	4.52303	Trep1	M	Anterior
340	32	2004-04-19	Group1	2004-04-19	2004-05-04	1	#NULL!	#NULL!	0	0		0	#NULL!	2	0	0	2008-10-27	53	M	0	0	2008-10-27	2008-10-27	false	Anterior	4.52303	Trep1	M	Anterior
341	36	2004-09-06	Group1	2004-09-06	2004-10-14	3	#NULL!	#NULL!	0	0		0	#NULL!	0	0	0	2012-05-22	69	W	0	0	2012-05-22	2012-05-22	false	Molars	7.70722	Trep1	W	Molar
341	43	2007-11-07	Group1	2007-11-07	2010-06-14	3	#NULL!	#NULL!	0	0		0	#NULL!	3	0	0	2012-05-22	72	W	0	0	2012-05-22	2012-05-22	false	Anterior	4.53946	Trep1	W	Anterior
342	34	1999-12-08	Group1	1999-12-08	2000-01-27	1	#NULL!	#NULL!	0	0		0	#NULL!	0	0	0	2016-09-20	52	M	0	0	2016-09-20	2016-09-20	false	Premolars	16.7861	Trep1	M	Premolar
342	46	2001-12-17	Group1	2001-12-17	2002-02-20	4	#NULL!	#NULL!	0	0		extracted	2005-09-01	1	0	0	2016-09-20	54	M	3	1	2005-09-01	2005-09-01	false	Molars	3.70713	Trep1	M	Molar
342	26	2004-03-09	Group1	2004-03-09	2004-03-23	1	#NULL!	#NULL!	0	0		extracted	2010-01-12	2	0	0	2016-09-20	56	M	3	1	2010-01-12	2010-01-12	false	Molars	5.84544	VitE	M	Molar
342	25	2009-10-06	Group1	2009-10-06	2009-10-06	0	#NULL!	#NULL!	0	0		0	#NULL!	4	0	0	2016-09-20	62	M	0	0	2016-09-20	2016-09-20	true	Premolars	6.95703	VitE	M	Premolar
342	12	2012-02-13	Group 3	2012-02-13	2012-06-14	1	#NULL!	#NULL!	0	0		0	#NULL!	5	0	0	2016-09-20	64	M	0	0	2016-09-20	2016-09-20	false	Anterior	4.60243	VitE	M	Anterior
342	44	2016-05-31	Group 3	2016-05-31	2016-05-31	0	#NULL!	#NULL!	0	0		0	#NULL!	6	0	0	2016-09-20	68	M	0	0	2016-09-20	2016-09-20	true	Premolars	0.306646	Trep1	M	Premolar
343	47	2004-07-05	Group1	2004-07-05	2004-08-02	1	#NULL!	#NULL!	0	0		0	#NULL!	0	0	12	2016-09-06	39	M	0	0	2016-09-06	2016-09-06	false	Molars	12.1728	Trep1	M	Molar
344	27	2008-04-09	Group1	2008-04-09	2008-05-06	3	#NULL!	#NULL!	0	0		0	#NULL!	1	0	0	2014-10-17	48	M	0	0	2014-10-17	2014-10-17	false	Molars	6.5217	VitE	M	Molar
345	44	2005-09-12	Group1	2005-09-12	2005-09-29	1	2012-04-10	2	0	root end surgery	WR	extracted	2016-07-13	1	0	14	2016-08-23	52	M	3	1	2016-07-13	2012-04-10	false	Premolars	6.57646	Trep1	M	Premolar
345	46	2005-11-14	Group1	2005-11-14	2005-11-22	1	2012-04-10	2	0	root end surgery	WR	extracted	2016-05-04	2	0	13	2016-08-23	52	M	3	1	2016-05-04	2012-04-10	false	Molars	6.40397	Trep1	M	Molar
345	47	2006-01-18	Group1	2006-01-18	2006-01-18	0	#NULL!	#NULL!	0	0		extracted	2012-02-13	3	0	1	2016-08-23	52	M	3	1	2012-02-13	2012-02-13	true	Molars	6.06995	Trep1	M	Molar
345	17	2009-07-23	Group 2	2009-07-23	2009-10-21	2	#NULL!	#NULL!	0	0		extracted	2012-02-13	4	0	1	2016-08-23	56	M	3	1	2012-02-13	2012-02-13	false	Molars	2.55995	VitE	M	Molar
345	16	2009-08-13	Group 2	2009-08-13	2009-10-21	2	#NULL!	#NULL!	0	0		extracted	2012-02-13	5	0	10	2016-08-23	56	M	3	1	2012-02-13	2012-02-13	false	Molars	2.50245	VitE	M	Molar
345	14	2012-01-30	Group 3	2012-01-30	2012-02-23	1	#NULL!	#NULL!	0	0		0	#NULL!	7	1	10	2016-08-23	58	M	0	0	2016-08-23	2016-08-23	false	Premolars	4.5641	Trep1	M	Premolar
346	45	2009-11-30	Group 2	2009-11-30	2009-12-07	1	#NULL!	#NULL!	0	0		0	#NULL!	0	0	5	2016-07-06	70	M	0	0	2016-07-06	2016-07-06	false	Premolars	6.59836	Trep1	M	Premolar
347	43	2003-01-07	Group1	2003-01-07	2003-02-13	2	2007-05-22	5	retreatment	0		0	#NULL!	0	0	0	2016-03-23	69	W	1	1	2016-03-23	2007-05-22	false	Anterior	4.36971	VitE	W	Anterior
347	34	2004-12-15	Group1	2004-12-15	2004-12-15	0	#NULL!	#NULL!	0	0		extracted	2013-08-13	1	0	0	2016-03-23	71	W	3	1	2013-08-13	2013-08-13	true	Premolars	8.66001	VitE	W	Premolar
347	45	2006-02-06	Group1	2006-02-06	2006-04-13	2	#NULL!	#NULL!	0	0		extracted	2007-09-18	2	0	0	2016-03-23	72	W	3	1	2007-09-18	2007-09-18	false	Premolars	1.61263	Trep1	W	Premolar
347	33	2013-08-23	Group 3	2013-08-23	2013-09-05	1	#NULL!	#NULL!	0	0		0	#NULL!	5	0	0	2016-03-23	80	W	0	0	2016-03-23	2016-03-23	false	Anterior	2.58185	Trep1	W	Anterior
348	43	2001-10-08	Group1	2001-10-08	2001-10-11	1	#NULL!	#NULL!	0	0		0	#NULL!	0	0	0	2005-06-07	80	W	0	0	2005-06-07	2005-06-07	false	Anterior	3.66332	Trep1	W	Anterior
348	44	2003-03-27	Group1	2003-03-27	2003-04-29	2	#NULL!	#NULL!	0	0		0	#NULL!	1	0	0	2005-06-07	81	W	0	0	2005-06-07	2005-06-07	false	Premolars	2.19854	VitE	W	Premolar
349	23	2006-02-27	Group1	2006-02-27	2006-03-01	1	#NULL!	#NULL!	0	0		extracted	2008-11-10	0	0	0	2016-01-18	61	W	3	1	2008-11-10	2008-11-10	false	Anterior	2.70232	Trep1	W	Anterior
350	46	2005-07-08	Group1	2005-07-08	2005-09-15	1	2011-06-07	3	retreatment	0		extracted	2013-03-18	0	0	6	2016-08-31	53	M	3	1	2013-03-18	2011-06-07	false	Molars	5.91389	Trep1	M	Molar
351	36	2005-04-04	Group1	2005-04-04	2005-05-30	3	#NULL!	#NULL!	0	0		0	#NULL!	0	0	0	2009-03-25	54	W	0	0	2009-03-25	2009-03-25	false	Molars	3.97271	Trep1	W	Molar
352	46	2003-05-19	Group1	2003-05-19	2003-06-12	1	#NULL!	#NULL!	0	0		extracted	2004-08-11	0	0	0	2005-02-17	68	W	3	1	2004-08-11	2004-08-11	false	Molars	1.23206	VitE	W	Molar
352	25	2003-06-04	Group1	2003-06-04	2003-06-25	1	#NULL!	#NULL!	0	0		0	#NULL!	1	0	0	2005-02-17	68	W	0	0	2005-02-17	2005-02-17	false	Premolars	1.70846	Trep1	W	Premolar
352	14	2003-06-04	Group1	2003-06-04	2003-06-25	1	#NULL!	#NULL!	0	0		0	#NULL!	1	0	0	2005-02-17	68	W	0	0	2005-02-17	2005-02-17	false	Premolars	1.70846	Trep1	W	Premolar
353	35	2004-03-11	Group1	2004-03-11	2004-03-30	1	2006-04-10	1	0	root end surgery	WR	0	#NULL!	0	0	0	2010-03-01	24	M	2	1	2010-03-01	2006-04-10	false	Premolars	2.08081	Trep1	M	Premolar
354	44	2000-05-02	Group1	2000-05-02	2000-07-12	2	#NULL!	#NULL!	0	0		0	#NULL!	0	0	0	2002-08-13	40	M	0	0	2002-08-13	2002-08-13	false	Premolars	2.28068	Trep1	M	Premolar
355	22	2008-01-14	Group1	2008-01-14	2008-02-20	2	#NULL!	#NULL!	0	0		0	#NULL!	1	0	0	2016-08-24	83	M	0	0	2016-08-24	2016-08-24	false	Anterior	8.61073	Trep1	M	Anterior
356	47	2009-05-28	Group 2	2009-05-28	2009-06-22	1	#NULL!	#NULL!	0	0		extracted	2014-10-21	0	0	6	2016-09-22	57	W	3	1	2014-10-21	2014-10-21	false	Molars	5.39916	Trep1	W	Molar
357	16	2007-02-14	Group1	2007-02-14	2007-07-17	4	#NULL!	#NULL!	0	0		0	#NULL!	0	0	0	2008-01-14	40	W	0	0	2008-01-14	2008-01-14	false	Molars	0.914462	VitE	W	Molar
358	14	2000-06-16	Group1	2000-06-16	2000-10-04	2	#NULL!	#NULL!	0	0		0	#NULL!	0	0	0	2004-12-28	37	W	0	0	2004-12-28	2004-12-28	false	Premolars	4.53398	VitE	W	Premolar
359	27	2008-06-09	Group1	2008-06-09	2008-08-15	3	#NULL!	#NULL!	0	0		extracted	2009-10-29	0	0	0	2016-09-20	56	M	3	1	2009-10-29	2009-10-29	false	Molars	1.38812	VitE	M	Molar
360	37	2006-01-25	Group1	2006-01-25	2006-04-12	4	#NULL!	#NULL!	0	0		0	#NULL!	0	0	0	2006-05-09	34	W	0	0	2006-05-09	2006-05-09	false	Molars	0.284743	VitE	W	Molar
361	22	2010-04-19	Group 2	2010-04-19	2010-05-05	1	#NULL!	#NULL!	0	0		0	#NULL!	0	0	0	2010-05-05	52	M	0	0	2010-05-05	2010-05-05	false	Anterior	0.0438066	Trep1	M	Anterior
362	21	2006-10-25	Group1	2006-10-25	2006-10-25	0	#NULL!	#NULL!	0	0		0	#NULL!	0	0	11	2016-08-23	53	W	0	0	2016-08-23	2016-08-23	true	Anterior	9.8291	Trep1	W	Anterior
362	11	2006-10-25	Group1	2006-10-25	2006-10-25	0	#NULL!	#NULL!	0	0		0	#NULL!	0	0	11	2016-08-23	53	W	0	0	2016-08-23	2016-08-23	true	Anterior	9.8291	Trep1	W	Anterior
362	37	2007-01-02	Group1	2007-01-02	2007-03-20	2	2009-02-18	2	retreatment	0		extracted	2015-10-06	2	0	9	2016-08-23	53	W	3	1	2015-10-06	2009-02-18	false	Molars	2.13009	Trep1	W	Molar
363	22	2015-10-19	Group 3	2015-10-19	2015-12-02	1	#NULL!	#NULL!	0	0		0	#NULL!	0	0	0	2016-09-06	51	W	0	0	2016-09-06	2016-09-06	false	Anterior	0.884345	Trep1	W	Anterior
364	15	2006-01-26	Group1	2006-01-26	2006-03-28	2	#NULL!	#NULL!	0	0		0	#NULL!	0	0	0	2007-06-26	64	W	0	0	2007-06-26	2007-06-26	false	Premolars	1.41276	Trep1	W	Premolar
365	34	2010-08-12	Group 2	2010-08-12	2010-08-18	1	#NULL!	#NULL!	0	0		0	#NULL!	0	0	0	2013-01-10	56	W	0	0	2013-01-10	2013-01-10	false	Premolars	2.41484	Trep1	W	Premolar
366	38	1999-09-09	Group1	1999-09-09	1999-09-22	2	#NULL!	#NULL!	0	0		extracted	2006-06-06	0	0	0	2016-09-22	48	M	3	1	2006-06-06	2006-06-06	false	Molars	6.74074	Trep1	M	Molar
366	12	2000-11-22	Group1	2000-11-22	2000-12-06	1	#NULL!	#NULL!	0	0		extracted	2016-08-30	1	0	8	2016-09-22	49	M	3	1	2016-08-30	2016-08-30	false	Anterior	15.7704	Trep1	M	Anterior
366	21	2005-08-23	Group1	2005-08-23	2005-08-30	1	#NULL!	#NULL!	0	0		extracted	2016-08-30	2	0	9	2016-09-22	54	M	3	1	2016-08-30	2016-08-30	false	Anterior	11.0201	Trep1	M	Anterior
366	47	2007-01-23	Group1	2007-01-23	2007-03-06	3	#NULL!	#NULL!	0	0		extracted	2015-06-24	3	0	7	2016-09-22	55	M	3	1	2015-06-24	2015-06-24	false	Molars	8.41634	VitE	M	Molar
367	34	2006-05-31	Group1	2006-05-31	2006-06-14	2	#NULL!	#NULL!	0	0		0	#NULL!	0	0	0	2006-08-07	71	M	0	0	2006-08-07	2006-08-07	false	Premolars	0.186178	Trep1	M	Premolar
368	16	2013-01-31	Group 3	2013-01-31	2013-03-07	1	#NULL!	#NULL!	0	0		0	#NULL!	1	0	8	2016-06-15	71	M	0	0	2016-06-15	2016-06-15	false	Molars	3.37037	Trep1	M	Molar
369	36	2006-03-13	Group1	2006-03-13	2006-03-27	2	#NULL!	#NULL!	0	0		0	#NULL!	0	0	1	2013-11-06	35	M	0	0	2013-11-06	2013-11-06	false	Molars	7.65246	VitE	M	Molar
370	47	2006-05-04	Group1	2006-09-19	2006-12-21	2	#NULL!	#NULL!	0	0		0	#NULL!	0	0	0	2006-12-28	22	M	0	0	2006-12-28	2006-12-28	false	Molars	0.651623	VitE	M	Molar
371	23	1999-06-15	Group1	1999-06-15	1999-08-23	2	2002-05-07	2	retreatment	0		0	#NULL!	0	0	0	2007-02-07	59	M	1	1	2007-02-07	2002-05-07	false	Anterior	2.89397	Trep1	M	Anterior
371	22	1999-06-30	Group1	1999-06-30	1999-08-23	2	2002-05-07	1	retreatment	0		0	#NULL!	1	0	0	2007-02-07	59	M	1	1	2007-02-07	2002-05-07	false	Anterior	2.8529	Trep1	M	Anterior
372	23	2006-02-08	Group1	2006-02-08	2006-03-23	2	#NULL!	#NULL!	0	0		0	#NULL!	0	0	0	2006-05-03	78	M	0	0	2006-05-03	2006-05-03	false	Anterior	0.229985	Trep1	M	Anterior
373	26	2004-09-21	Group1	2004-09-21	2004-12-16	3	#NULL!	#NULL!	0	0		0	#NULL!	0	0	0	2005-03-03	34	W	0	0	2005-03-03	2005-03-03	false	Molars	0.446279	VitE	W	Molar
374	15	2002-10-30	Group1	2002-10-30	2002-11-13	1	#NULL!	#NULL!	0	0		0	#NULL!	0	0	0	2003-12-29	28	M	0	0	2003-12-29	2003-12-29	false	Premolars	1.16361	VitE	M	Premolar
375	47	2002-10-07	Group1	2002-10-07	2002-10-07	0	#NULL!	#NULL!	0	0		extracted	2009-01-30	0	0	2	2016-04-26	54	W	3	1	2009-01-30	2009-01-30	true	Molars	6.31636	Trep1	W	Molar
375	35	2014-02-06	Group 3	2014-02-06	2014-02-11	1	#NULL!	#NULL!	0	0		0	#NULL!	1	0	1	2016-04-26	65	W	0	0	2016-04-26	2016-04-26	false	Premolars	2.21771	Trep1	W	Premolar
376	45	2003-10-22	Group1	2003-10-22	2003-11-18	3	#NULL!	#NULL!	0	0		0	#NULL!	0	0	0	2011-04-07	35	M	0	0	2011-04-07	2011-04-07	false	Premolars	7.45807	Trep1	M	Premolar
377	33	2003-12-23	Group1	2003-12-23	2007-02-06	4	2007-04-12	2	0	root end surgery	WR	extracted	2012-02-13	0	0	0	2012-08-31	66	M	3	1	2012-02-13	2007-04-12	false	Anterior	3.30192	Trep1	M	Anterior
377	43	2006-10-19	Group1	2006-11-29	2007-02-06	2	#NULL!	#NULL!	0	0		0	#NULL!	2	0	0	2012-08-31	68	M	0	0	2012-08-31	2012-08-31	false	Anterior	5.86734	Trep1	M	Anterior
377	44	2007-01-04	Group1	2007-01-04	2007-02-06	1	#NULL!	#NULL!	0	0		0	#NULL!	5	0	0	2012-08-31	69	M	0	0	2012-08-31	2012-08-31	false	Premolars	5.65652	Trep1	M	Premolar
378	37	2004-09-02	Group1	2004-09-02	2004-09-30	2	#NULL!	#NULL!	0	0		0	#NULL!	0	0	3	2013-01-17	29	M	0	0	2013-01-17	2013-01-17	false	Molars	8.37527	Trep1	M	Molar
379	47	2006-10-05	Group1	2006-10-05	2006-11-30	2	#NULL!	#NULL!	0	0		0	#NULL!	0	0	2	2015-11-17	38	W	0	0	2015-11-17	2015-11-17	false	Molars	9.11724	Trep1	W	Molar
379	44	2008-12-16	Group1	2008-12-16	2009-02-03	1	2010-11-25	2	retreatment	0		0	#NULL!	2	0	2	2015-11-17	40	W	1	1	2015-11-17	2010-11-25	false	Premolars	1.94118	VitE	W	Premolar
379	15	2010-11-03	Group1	2010-11-03	2011-02-09	1	#NULL!	#NULL!	0	0		0	#NULL!	3	0	2	2015-11-17	42	W	0	0	2015-11-17	2015-11-17	false	Premolars	5.03776	VitE	W	Premolar
379	36	2011-05-10	Group 2	2011-05-10	2011-06-08	2	#NULL!	#NULL!	0	0		0	#NULL!	5	0	2	2015-11-17	43	W	0	0	2015-11-17	2015-11-17	false	Molars	4.52303	Trep1	W	Molar
380	44	2000-12-07	Group1	2000-12-07	2001-01-24	2	#NULL!	#NULL!	0	0		0	#NULL!	0	0	0	2011-07-27	71	W	0	0	2011-07-27	2011-07-27	false	Premolars	10.634	Trep1	W	Premolar
380	45	2001-09-25	Group1	2001-09-25	2001-11-20	2	2002-04-15	1	0	root end surgery	WR	extracted	2009-08-11	1	0	0	2011-07-27	72	W	3	1	2009-08-11	2002-04-15	false	Premolars	0.553058	Trep1	W	Premolar
380	13	2009-08-05	Group 2	2009-08-05	2009-08-19	1	#NULL!	#NULL!	0	0		0	#NULL!	2	0	0	2011-07-27	80	W	0	0	2011-07-27	2011-07-27	false	Anterior	1.97403	VitE	W	Anterior
380	35	2009-09-10	Group 2	2009-09-10	2009-10-07	2	#NULL!	#NULL!	0	0		0	#NULL!	3	1	0	2011-07-27	80	W	0	0	2011-07-27	2011-07-27	false	Premolars	1.87547	VitE	W	Premolar
380	46	2009-10-28	Group 2	2009-10-28	2009-11-12	2	#NULL!	#NULL!	0	0		0	#NULL!	4	1	0	2011-07-27	80	W	0	0	2011-07-27	2011-07-27	false	Molars	1.74405	Trep1	W	Molar
381	33	2003-10-28	Group1	2003-10-28	2003-11-18	2	#NULL!	#NULL!	0	0		0	#NULL!	0	0	0	2005-06-06	69	M	0	0	2005-06-06	2005-06-06	false	Anterior	1.60715	VitE	M	Anterior
382	23	1999-09-23	Group1	1999-09-23	1999-10-12	1	#NULL!	#NULL!	0	0		extracted	2001-03-15	0	0	0	2014-06-16	64	W	3	1	2001-03-15	2001-03-15	false	Anterior	1.47573	Trep1	W	Anterior
382	22	2001-10-18	Group1	2001-10-18	2001-10-18	0	#NULL!	#NULL!	0	0		extracted	2002-04-25	1	0	3	2014-06-16	66	W	3	1	2002-04-25	2002-04-25	true	Anterior	0.517465	VitE	W	Anterior
382	36	2001-12-11	Group1	2001-12-11	2001-12-11	0	2010-03-15	7	0	root end surgery	WR	extracted	2011-04-07	2	0	10	2014-06-16	66	W	3	1	2011-04-07	2010-03-15	true	Molars	8.25754	VitE	W	Molar
382	13	2005-02-07	Group1	2005-02-07	2005-02-24	1	#NULL!	#NULL!	0	0		extracted	2006-07-11	3	0	0	2014-06-16	69	W	3	1	2006-07-11	2006-07-11	false	Anterior	1.42098	Trep1	W	Anterior
383	27	2008-07-01	Group1	2008-07-01	2008-08-21	2	#NULL!	#NULL!	0	0		0	#NULL!	0	0	1	2016-03-24	68	M	0	0	2016-03-24	2016-03-24	false	Molars	7.72912	VitE	M	Molar
384	37	1999-12-21	Group1	1999-12-21	2000-03-02	2	#NULL!	#NULL!	0	0		extracted	2001-11-22	0	0	0	2015-11-03	50	W	3	1	2001-11-22	2001-11-22	false	Molars	1.92201	VitE	W	Molar
385	22	2003-08-06	Group1	2003-08-06	2003-08-06	0	#NULL!	#NULL!	0	0		0	#NULL!	0	0	2	2016-06-02	65	M	0	0	2016-06-02	2016-06-02	true	Anterior	12.8244	VitE	M	Anterior
385	17	2004-11-29	Group1	2004-11-29	2004-12-20	1	#NULL!	#NULL!	0	0		0	#NULL!	1	0	2	2016-06-02	66	M	0	0	2016-06-02	2016-06-02	false	Molars	11.5074	VitE	M	Molar
385	42	2010-03-02	Group1	2010-03-02	2010-04-01	1	#NULL!	#NULL!	0	0		extracted	2013-10-01	3	0	0	2016-06-02	72	M	3	1	2013-10-01	2013-10-01	false	Anterior	3.58393	Trep1	M	Anterior
385	41	2013-07-23	Group 3	2013-07-23	2013-07-23	0	#NULL!	#NULL!	0	0		0	#NULL!	4	0	2	2016-06-02	75	M	0	0	2016-06-02	2016-06-02	true	Anterior	2.86112	VitE	M	Anterior
385	31	2015-07-28	Group 3	2015-07-28	2015-07-28	0	#NULL!	#NULL!	0	0		0	#NULL!	5	0	1	2016-06-02	77	M	0	0	2016-06-02	2016-06-02	true	Anterior	0.848752	Trep1	M	Anterior
386	34	1999-08-26	Group1	1999-08-26	1999-09-23	2	1999-10-19	1	0	root end surgery	WR	extracted	2011-05-30	0	0	4	2016-09-26	55	M	3	1	2011-05-30	1999-10-19	false	Premolars	0.147847	Trep1	M	Premolar
386	32	2002-04-16	Group1	2002-04-16	2002-05-14	2	#NULL!	#NULL!	0	0		0	#NULL!	1	0	4	2016-09-26	57	M	0	0	2016-09-26	2016-09-26	false	Anterior	14.448	VitE	M	Anterior
386	47	2011-05-16	Group 2	2011-05-16	2011-09-26	2	#NULL!	#NULL!	0	0		0	#NULL!	2	1	4	2016-09-26	67	M	0	0	2016-09-26	2016-09-26	false	Molars	5.36631	Trep1	M	Molar
387	27	2007-03-15	Group1	2007-03-15	2007-04-12	1	#NULL!	#NULL!	0	0		0	#NULL!	0	0	1	2016-06-02	39	M	0	0	2016-06-02	2016-06-02	false	Molars	9.21855	VitE	M	Molar
387	17	2014-01-14	Group 3	2014-01-14	2014-02-27	1	#NULL!	#NULL!	0	0		0	#NULL!	1	0	0	2016-06-02	45	M	0	0	2016-06-02	2016-06-02	false	Molars	2.38198	VitE	M	Molar
388	34	2005-12-19	Group1	2005-12-19	2006-01-09	1	#NULL!	#NULL!	0	0		extracted	2013-07-09	1	0	2	2016-04-15	67	M	3	1	2013-07-09	2013-07-09	false	Premolars	7.5539	VitE	M	Premolar
388	35	2013-12-04	Group 3	2013-12-04	2013-12-04	0	#NULL!	#NULL!	0	0		0	#NULL!	2	0	3	2016-04-15	75	M	0	0	2016-04-15	2016-04-15	true	Premolars	2.36282	Trep1	M	Premolar
389	25	2004-04-01	Group1	2004-04-01	2004-04-08	2	#NULL!	#NULL!	0	0		extracted	2009-12-10	0	0	0	2016-07-08	69	M	3	1	2009-12-10	2009-12-10	false	Premolars	5.69212	Trep1	M	Premolar
389	13	2004-10-05	Group1	2004-10-05	2004-10-05	0	#NULL!	#NULL!	0	0		0	#NULL!	1	0	3	2016-07-08	69	M	0	0	2016-07-08	2016-07-08	true	Anterior	11.7566	VitE	M	Anterior
389	23	2007-08-14	Group1	2007-08-14	2007-09-05	1	#NULL!	#NULL!	0	0		0	#NULL!	2	0	3	2016-07-08	72	M	0	0	2016-07-08	2016-07-08	false	Anterior	8.90095	Trep1	M	Anterior
389	17	2009-06-25	Group 2	2009-06-25	2009-07-21	1	#NULL!	#NULL!	0	0		0	#NULL!	3	0	3	2016-07-08	74	M	0	0	2016-07-08	2016-07-08	false	Molars	7.03643	Trep1	M	Molar
389	44	2011-06-09	Group 2	2011-06-09	2011-06-09	0	#NULL!	#NULL!	0	0		0	#NULL!	4	0	2	2016-07-08	76	M	0	0	2016-07-08	2016-07-08	true	Premolars	5.08156	VitE	M	Premolar
389	36	2011-07-15	Group 2	2011-07-15	2011-09-13	2	#NULL!	#NULL!	0	0		0	#NULL!	5	0	3	2016-07-08	76	M	0	0	2016-07-08	2016-07-08	false	Molars	4.983	VitE	M	Molar
389	24	2015-12-16	Group 3	2015-12-16	2016-01-28	2	#NULL!	#NULL!	0	0		extracted	2016-06-22	6	0	2	2016-07-08	80	M	3	1	2016-06-22	2016-06-22	false	Premolars	0.517465	Trep1	M	Premolar
390	34	2005-11-22	Group1	2005-11-22	2006-01-09	1	#NULL!	#NULL!	0	0		extracted	2009-03-13	1	0	0	2009-03-26	70	W	3	1	2009-03-13	2009-03-13	false	Premolars	3.30466	Trep1	W	Premolar
390	32	2007-10-31	Group1	2007-10-31	2007-11-19	1	2008-05-28	2	retreatment	0		0	#NULL!	3	0	0	2009-03-26	72	W	1	1	2009-03-26	2008-05-28	false	Anterior	0.574961	Trep1	W	Anterior
390	25	2008-05-02	Group1	2008-05-02	2008-05-19	1	#NULL!	#NULL!	0	0		0	#NULL!	4	0	0	2009-03-26	73	W	0	0	2009-03-26	2009-03-26	false	Premolars	0.898035	VitE	W	Premolar
390	43	2008-06-19	Group1	2008-06-19	2008-07-01	1	#NULL!	#NULL!	0	0		0	#NULL!	6	0	0	2009-03-26	73	W	0	0	2009-03-26	2009-03-26	false	Anterior	0.766615	VitE	W	Anterior
390	33	2008-07-03	Group1	2008-07-03	2008-07-03	0	#NULL!	#NULL!	0	0		0	#NULL!	7	0	0	2009-03-26	73	W	0	0	2009-03-26	2009-03-26	true	Anterior	0.728284	Trep1	W	Anterior
391	25	2004-02-09	Group1	2004-02-09	2004-02-09	0	#NULL!	#NULL!	0	0		0	#NULL!	1	0	0	2007-08-13	76	W	0	0	2007-08-13	2007-08-13	true	Premolars	3.50726	VitE	W	Premolar
391	11	2004-02-09	Group1	2004-02-09	2004-02-09	0	#NULL!	#NULL!	0	0		0	#NULL!	1	0	0	2007-08-13	76	W	0	0	2007-08-13	2007-08-13	true	Anterior	3.50726	VitE	W	Anterior
392	13	2001-05-08	Group1	2001-05-08	2001-05-08	0	#NULL!	#NULL!	0	0		0	#NULL!	0	0	0	2009-05-06	76	M	0	0	2009-05-06	2009-05-06	true	Anterior	7.9947	VitE	M	Anterior
392	45	2005-04-07	Group1	2005-04-07	2005-04-28	1	#NULL!	#NULL!	0	0		0	#NULL!	1	0	0	2009-05-06	80	M	0	0	2009-05-06	2009-05-06	false	Premolars	4.07949	Trep1	M	Premolar
393	17	2003-03-26	Group1	2003-03-26	2003-06-03	4	#NULL!	#NULL!	0	0		extracted	2008-08-14	0	0	0	2008-09-23	45	W	3	1	2008-08-14	2008-08-14	false	Molars	5.38821	VitE	W	Molar
393	15	2003-03-26	Group1	2003-03-26	2005-08-22	2	#NULL!	#NULL!	0	0		0	#NULL!	0	0	0	2008-09-23	45	W	0	0	2008-09-23	2008-09-23	false	Premolars	5.49772	VitE	W	Premolar
394	14	2002-01-30	Group1	2002-01-30	2002-01-30	0	#NULL!	#NULL!	0	0		0	#NULL!	0	0	4	2016-08-16	63	W	0	0	2016-08-16	2016-08-16	true	Premolars	14.5438	Trep1	W	Premolar
395	21	2010-10-20	Group 2	2010-10-20	2010-11-04	1	#NULL!	#NULL!	0	0		0	#NULL!	0	0	3	2016-08-08	77	M	0	0	2016-08-08	2016-08-08	false	Anterior	5.80163	VitE	M	Anterior
395	25	2011-04-18	Group 2	2011-04-18	2011-05-25	1	#NULL!	#NULL!	0	0		0	#NULL!	1	0	3	2016-08-08	78	M	0	0	2016-08-08	2016-08-08	false	Premolars	5.30881	Trep1	M	Premolar
396	12	2002-10-04	Group1	2002-10-04	2002-11-06	2	#NULL!	#NULL!	0	0		0	#NULL!	0	0	0	2003-06-23	63	W	0	0	2003-06-23	2003-06-23	false	Anterior	0.717333	Trep1	W	Anterior
397	37	2004-10-11	Group1	2004-10-11	2004-11-23	3	#NULL!	#NULL!	0	0		0	#NULL!	1	0	4	2016-09-26	65	W	0	0	2016-09-26	2016-09-26	false	Molars	11.9592	Trep1	W	Molar
397	32	2015-04-16	Group 3	2015-04-16	2015-04-16	0	#NULL!	#NULL!	0	0		extracted	2015-12-15	2	0	0	2016-09-26	76	W	3	1	2015-12-15	2015-12-15	true	Anterior	0.665312	Trep1	W	Anterior
397	42	2015-08-18	Group 3	2015-08-18	2015-08-26	1	#NULL!	#NULL!	0	0		extracted	2015-12-15	3	0	0	2016-09-26	76	W	3	1	2015-12-15	2015-12-15	false	Anterior	0.325811	Trep1	W	Anterior
398	33	2003-09-10	Group1	2003-09-10	2003-09-10	0	2003-10-06	1	retreatment	0		0	#NULL!	0	0	0	2003-11-05	75	M	1	1	2003-11-05	2003-10-06	true	Anterior	0.0711857	Trep1	M	Anterior
399	25	2000-05-16	Group1	2000-05-16	2000-05-16	0	#NULL!	#NULL!	0	0		0	#NULL!	0	0	0	2004-03-24	17	W	0	0	2004-03-24	2004-03-24	true	Premolars	3.85498	VitE	W	Premolar
400	45	2000-09-14	Group1	2000-09-14	2000-10-02	1	#NULL!	#NULL!	0	0		extracted	2006-07-06	0	0	8	2016-06-13	51	M	3	1	2006-07-06	2006-07-06	false	Premolars	5.80711	VitE	M	Premolar
400	34	2006-05-31	Group1	2006-05-31	2006-06-19	4	#NULL!	#NULL!	0	0		extracted	2009-04-16	1	0	8	2016-06-13	56	M	3	1	2009-04-16	2009-04-16	false	Premolars	2.87754	Trep1	M	Premolar
400	44	2008-01-03	Group1	2008-01-03	2008-02-06	2	#NULL!	#NULL!	0	0		0	#NULL!	2	0	8	2016-06-13	58	M	0	0	2016-06-13	2016-06-13	false	Premolars	8.44372	VitE	M	Premolar
401	37	2012-02-07	Group 3	2012-02-23	2012-02-23	1	2012-03-26	1	retreatment	0		0	#NULL!	0	0	3	2013-07-30	57	W	1	1	2013-07-30	2012-03-26	true	Molars	0.13142	Trep1	W	Molar
402	44	2000-11-28	Group1	2000-11-28	2000-12-07	1	#NULL!	#NULL!	0	0		0	#NULL!	0	0	0	2015-01-12	75	M	0	0	2015-01-12	2015-01-12	false	Premolars	14.1221	Trep1	M	Premolar
403	46	1999-07-15	Group1	1999-07-15	1999-09-20	2	#NULL!	#NULL!	0	0		extracted	2013-01-07	0	0	0	2016-04-19	73	M	3	1	2013-01-07	2013-01-07	false	Molars	13.4842	Trep1	M	Molar
403	35	2007-10-01	Group1	2007-10-01	2007-10-01	0	#NULL!	#NULL!	0	0		extracted	2011-03-08	1	0	0	2016-04-19	81	M	3	1	2011-03-08	2011-03-08	true	Premolars	3.43334	VitE	M	Premolar
404	21	2003-10-09	Group1	2003-10-09	2003-11-20	2	#NULL!	#NULL!	0	0		0	#NULL!	0	0	0	2005-11-10	20	W	0	0	2005-11-10	2005-11-10	false	Anterior	2.08903	Trep1	W	Anterior
405	47	2002-01-22	Group1	2002-01-29	2002-01-29	0	#NULL!	#NULL!	0	0		0	#NULL!	0	0	0	2004-10-05	25	M	0	0	2004-10-05	2004-10-05	true	Molars	2.70232	VitE	M	Molar
406	46	1999-08-05	Group1	1999-08-05	1999-08-19	1	#NULL!	#NULL!	0	0		extracted	2000-02-10	0	0	1	2013-04-19	62	M	3	1	2000-02-10	2000-02-10	false	Molars	0.517465	VitE	M	Molar
406	26	2004-10-04	Group1	2004-10-04	2005-02-28	4	2008-11-24	5	retreatment	0		extracted	2012-03-01	1	0	2	2013-04-19	67	M	3	1	2012-03-01	2008-11-24	false	Molars	4.13972	Trep1	M	Molar
407	34	2005-09-05	Group1	2005-09-05	2005-11-17	2	#NULL!	#NULL!	0	0		0	#NULL!	0	0	7	2016-08-03	55	M	0	0	2016-08-03	2016-08-03	false	Premolars	10.9106	Trep1	M	Premolar
408	23	2001-06-25	Group1	2001-06-25	2001-07-02	1	2003-04-24	1	0	root end surgery	WR	0	#NULL!	0	0	0	2003-12-03	58	W	2	1	2003-12-03	2003-04-24	false	Anterior	1.82892	Trep1	W	Anterior
409	45	2000-10-30	Group1	2000-10-30	2000-12-05	1	#NULL!	#NULL!	0	0		0	#NULL!	0	0	0	2005-05-11	23	M	0	0	2005-05-11	2005-05-11	false	Premolars	4.5285	VitE	M	Premolar
409	46	2004-09-13	Group1	2004-09-13	2004-10-14	2	#NULL!	#NULL!	0	0		0	#NULL!	1	0	0	2005-05-11	27	M	0	0	2005-05-11	2005-05-11	false	Molars	0.657099	VitE	M	Molar
409	36	2005-02-16	Group1	2005-02-16	2005-03-07	1	#NULL!	#NULL!	0	0		0	#NULL!	3	0	0	2005-05-11	28	M	0	0	2005-05-11	2005-05-11	false	Molars	0.229985	VitE	M	Molar
410	35	2006-10-11	Group1	2006-10-11	2006-11-02	3	#NULL!	#NULL!	0	0		extracted	2010-06-07	0	0	0	2016-02-16	72	W	3	1	2010-06-07	2010-06-07	false	Premolars	3.65511	Trep1	W	Premolar
411	34	2006-10-09	Group1	2006-10-09	2006-11-15	3	#NULL!	#NULL!	0	0		0	#NULL!	0	0	5	2016-08-04	83	W	0	0	2016-08-04	2016-08-04	false	Premolars	9.82089	Trep1	W	Premolar
411	35	2007-10-16	Group1	2007-10-16	2007-10-16	0	#NULL!	#NULL!	0	0		0	#NULL!	1	0	5	2016-08-04	84	W	0	0	2016-08-04	2016-08-04	true	Premolars	8.80238	VitE	W	Premolar
411	23	2012-01-25	Group 3	2012-01-25	2012-02-07	1	#NULL!	#NULL!	0	0		0	#NULL!	2	0	5	2016-08-04	89	W	0	0	2016-08-04	2016-08-04	false	Anterior	4.52577	VitE	W	Anterior
411	44	2012-06-21	Group 3	2012-06-21	2012-07-03	1	#NULL!	#NULL!	0	0		0	#NULL!	3	0	4	2016-08-04	89	W	0	0	2016-08-04	2016-08-04	false	Premolars	4.12056	Trep1	W	Premolar
411	24	2012-11-14	Group 3	2012-11-14	2012-11-14	0	#NULL!	#NULL!	0	0		0	#NULL!	4	0	3	2016-08-04	90	W	0	0	2016-08-04	2016-08-04	true	Premolars	3.72082	VitE	W	Premolar
411	21	2015-12-17	Group 3	2015-12-17	2016-01-28	1	#NULL!	#NULL!	0	0		0	#NULL!	5	0	0	2016-08-04	93	W	0	0	2016-08-04	2016-08-04	false	Anterior	0.632457	Trep1	W	Anterior
411	45	2016-04-19	Group 3	2016-04-19	2016-04-19	0	#NULL!	#NULL!	0	0		0	#NULL!	6	0	0	2016-08-04	93	W	0	0	2016-08-04	2016-08-04	true	Premolars	0.292956	VitE	W	Premolar
412	36	2009-06-29	Group 2	2009-06-29	2009-08-17	2	#NULL!	#NULL!	0	0		0	#NULL!	0	0	6	2016-06-29	42	W	0	0	2016-06-29	2016-06-29	false	Molars	7.00084	VitE	W	Molar
413	47	2002-08-29	Group1	2002-08-29	2002-11-18	2	#NULL!	#NULL!	0	0		0	#NULL!	0	0	2	2016-05-24	61	W	0	0	2016-05-24	2016-05-24	false	Molars	13.7361	VitE	W	Molar
413	32	2005-10-31	Group1	2005-10-31	2005-12-07	1	#NULL!	#NULL!	0	0		extracted	2015-03-25	4	0	2	2016-05-24	64	W	3	1	2015-03-25	2015-03-25	false	Anterior	9.39651	Trep1	W	Anterior
414	43	2016-02-09	Group 3	2016-02-09	2016-02-09	0	#NULL!	#NULL!	0	0		0	#NULL!	0	0	0	2016-08-10	82	M	0	0	2016-08-10	2016-08-10	true	Anterior	0.501038	VitE	M	Anterior
415	43	2003-10-16	Group1	2003-10-16	2003-11-13	3	#NULL!	#NULL!	0	0		0	#NULL!	0	0	0	2004-03-29	48	M	0	0	2004-03-29	2004-03-29	false	Anterior	0.451755	Trep1	M	Anterior
416	14	2002-11-13	Group1	2002-11-13	2002-12-19	3	#NULL!	#NULL!	0	0		extracted	2006-01-23	1	0	1	2016-07-05	47	M	3	1	2006-01-23	2006-01-23	false	Premolars	3.19514	VitE	M	Premolar
416	16	2008-11-06	Group 2	2008-11-06	2009-05-25	5	#NULL!	#NULL!	0	0		extracted	2013-03-12	3	0	8	2016-07-05	53	M	3	1	2013-03-12	2013-03-12	false	Molars	4.34506	VitE	M	Molar
416	46	2011-10-26	Group 2	2011-11-10	2012-02-16	2	#NULL!	#NULL!	0	0		0	#NULL!	4	0	10	2016-07-05	56	M	0	0	2016-07-05	2016-07-05	false	Molars	4.69278	Trep1	M	Molar
417	16	2011-11-15	Group 3	2011-11-15	2011-12-14	2	#NULL!	#NULL!	0	0		0	#NULL!	0	0	0	2014-09-29	48	M	0	0	2014-09-29	2014-09-29	false	Molars	2.87207	VitE	M	Molar
418	47	1999-07-26	Group1	1999-07-26	1999-09-01	2	#NULL!	#NULL!	0	0		0	#NULL!	0	0	0	2009-03-10	72	W	0	0	2009-03-10	2009-03-10	false	Molars	9.62376	Trep1	W	Molar
419	47	2008-06-10	Group1	2008-06-10	2008-08-06	3	#NULL!	#NULL!	0	0		extracted	2009-05-18	0	0	0	2015-09-10	69	W	3	1	2009-05-18	2009-05-18	false	Molars	0.936365	VitE	W	Molar
420	36	2012-10-15	Group 3	2012-10-15	2012-11-13	3	#NULL!	#NULL!	0	0		0	#NULL!	0	0	0	2012-11-13	48	W	0	0	2012-11-13	2012-11-13	false	Molars	0.0793994	Trep1	W	Molar
421	26	2007-08-08	Group1	2007-08-08	2007-09-18	2	#NULL!	#NULL!	0	0		0	#NULL!	0	0	10	2016-03-08	65	M	0	0	2016-03-08	2016-03-08	false	Molars	8.58335	VitE	M	Molar
422	35	2008-12-09	Group 2	2008-12-09	2009-03-11	2	#NULL!	#NULL!	0	0		0	#NULL!	0	0	6	2016-07-05	55	W	0	0	2016-07-05	2016-07-05	false	Premolars	7.57032	Trep1	W	Premolar
422	15	2013-08-06	Group 3	2013-08-06	2013-08-06	0	#NULL!	#NULL!	0	0		0	#NULL!	2	0	4	2016-07-05	59	W	0	0	2016-07-05	2016-07-05	true	Premolars	2.91314	Trep1	W	Premolar
423	45	2006-05-11	Group1	2006-05-11	2006-06-14	2	#NULL!	#NULL!	0	0		0	#NULL!	0	0	6	2014-05-26	67	W	0	0	2014-05-26	2014-05-26	false	Premolars	8.04124	Trep1	W	Premolar
423	12	2006-05-31	Group1	2006-05-31	2006-05-31	0	2006-08-24	1	0	root end surgery	WR	extracted	2008-06-12	1	0	6	2014-05-26	67	W	3	1	2008-06-12	2006-08-24	true	Anterior	0.232722	Trep1	W	Anterior
423	43	2008-07-28	Group1	2008-07-28	2008-07-28	0	#NULL!	#NULL!	0	0		0	#NULL!	2	1	6	2014-05-26	69	W	0	0	2014-05-26	2014-05-26	true	Anterior	5.82627	Trep1	W	Anterior
424	27	2013-04-04	Group 3	2013-04-04	2013-04-25	1	#NULL!	#NULL!	0	0		extracted	2014-04-29	0	0	2	2016-08-09	72	M	3	1	2014-04-29	2014-04-29	false	Molars	1.06779	Trep1	M	Molar
424	42	2014-08-21	Group 3	2014-08-21	2014-09-16	2	#NULL!	#NULL!	0	0		0	#NULL!	2	0	4	2016-08-09	74	M	0	0	2016-08-09	2016-08-09	false	Anterior	1.96856	Trep1	M	Anterior
425	43	2001-10-09	Group1	2001-10-09	2001-10-09	0	#NULL!	#NULL!	0	0		0	#NULL!	0	0	0	2008-11-12	64	M	0	0	2008-11-12	2008-11-12	true	Anterior	7.09393	VitE	M	Anterior
425	25	2002-02-20	Group1	2002-02-20	2002-02-20	0	#NULL!	#NULL!	0	0		0	#NULL!	1	0	0	2008-11-12	64	M	0	0	2008-11-12	2008-11-12	true	Premolars	6.72705	VitE	M	Premolar
426	25	2004-12-29	Group1	2004-12-29	2005-03-02	2	#NULL!	#NULL!	0	0		0	#NULL!	0	0	8	2016-03-14	61	W	0	0	2016-03-14	2016-03-14	false	Premolars	11.2063	Trep1	W	Premolar
426	14	2015-01-12	Group 3	2015-01-12	2015-02-25	1	#NULL!	#NULL!	0	0		0	#NULL!	1	0	3	2016-03-14	71	W	0	0	2016-03-14	2016-03-14	false	Premolars	1.16909	VitE	W	Premolar
427	16	2003-01-07	Group1	2003-01-07	2003-02-06	2	#NULL!	#NULL!	0	0		extracted	2010-07-20	0	0	5	2016-05-18	49	M	3	1	2010-07-20	2010-07-20	false	Molars	7.53199	VitE	M	Molar
427	24	2007-03-19	Group1	2007-03-19	2007-04-24	2	#NULL!	#NULL!	0	0		extracted	2008-11-24	1	0	5	2016-05-18	53	M	3	1	2008-11-24	2008-11-24	false	Premolars	1.68655	Trep1	M	Premolar
428	34	2000-06-26	Group1	2000-06-26	2000-08-07	3	#NULL!	#NULL!	0	0		0	#NULL!	0	0	0	2004-12-03	61	W	0	0	2004-12-03	2004-12-03	false	Premolars	4.43815	VitE	W	Premolar
429	25	2008-09-16	Group1	2008-09-16	2008-09-16	0	#NULL!	#NULL!	0	0		0	#NULL!	0	0	4	2016-01-22	44	M	0	0	2016-01-22	2016-01-22	true	Premolars	7.34855	Trep1	M	Premolar
430	44	2003-09-16	Group1	2003-09-16	2003-10-07	2	#NULL!	#NULL!	0	0		0	#NULL!	0	0	0	2011-06-22	42	M	0	0	2011-06-22	2011-06-22	false	Premolars	7.76471	Trep1	M	Premolar
430	16	2009-05-18	Group 2	2009-05-18	2009-09-01	4	#NULL!	#NULL!	0	0		0	#NULL!	1	0	0	2011-06-22	48	M	0	0	2011-06-22	2011-06-22	false	Molars	2.0945	Trep1	M	Molar
431	21	2003-06-10	Group1	2003-06-10	2003-07-07	2	#NULL!	#NULL!	0	0		extracted	2003-11-20	0	0	0	2010-10-21	84	M	3	1	2003-11-20	2003-11-20	false	Anterior	0.446279	VitE	M	Anterior
431	43	2010-08-06	Group 2	2010-08-06	2010-08-19	2	#NULL!	#NULL!	0	0		extracted	2010-08-23	2	0	0	2010-10-21	91	M	3	1	2010-08-23	2010-08-23	false	Anterior	0.0465445	Trep1	M	Anterior
432	47	2005-12-21	Group1	2005-12-21	2005-12-21	0	#NULL!	#NULL!	0	0		0	#NULL!	0	0	8	2016-07-26	60	W	0	0	2016-07-26	2016-07-26	true	Molars	10.5957	Trep1	W	Molar
433	27	2003-01-10	Group1	2003-01-10	2003-02-19	2	#NULL!	#NULL!	0	0		extracted	2006-09-13	0	0	0	2013-07-02	52	W	3	1	2006-09-13	2006-09-13	false	Molars	3.67428	Trep1	W	Molar
434	47	2000-05-23	Group1	2000-05-23	2000-05-23	0	#NULL!	#NULL!	0	0		extracted	2000-10-31	0	0	0	2016-07-12	65	W	3	1	2000-10-31	2000-10-31	true	Molars	0.440804	VitE	W	Molar
434	33	2006-06-13	Group1	2006-06-13	2006-11-02	3	#NULL!	#NULL!	0	0		0	#NULL!	1	0	9	2016-07-12	71	W	0	0	2016-07-12	2016-07-12	false	Anterior	10.081	Trep1	W	Anterior
434	12	2010-02-02	Group1	2010-02-02	2010-02-11	1	#NULL!	#NULL!	0	0		0	#NULL!	2	0	9	2016-07-12	74	W	0	0	2016-07-12	2016-07-12	false	Anterior	6.43957	Trep1	W	Anterior
434	13	2010-04-13	Group1	2010-04-13	2010-04-13	0	#NULL!	#NULL!	0	0		0	#NULL!	3	0	9	2016-07-12	74	W	0	0	2016-07-12	2016-07-12	true	Anterior	6.24791	Trep1	W	Anterior
434	15	2011-05-19	Group 2	2011-05-19	2011-07-07	1	#NULL!	#NULL!	0	0		extracted	2011-12-07	5	0	8	2016-07-12	76	W	3	1	2011-12-07	2011-12-07	false	Premolars	0.553058	Trep1	W	Premolar
434	25	2015-06-30	Group 3	2015-06-30	2015-06-30	0	#NULL!	#NULL!	0	0		0	#NULL!	6	0	2	2016-07-12	80	W	0	0	2016-07-12	2016-07-12	true	Premolars	1.03493	VitE	W	Premolar
435	22	2000-11-08	Group1	2000-11-08	2000-11-08	0	#NULL!	#NULL!	0	0		extracted	2010-05-25	0	0	0	2011-05-10	65	W	3	1	2010-05-25	2010-05-25	true	Anterior	9.54162	Trep1	W	Anterior
435	11	2000-11-08	Group1	2000-11-08	2000-11-08	0	#NULL!	#NULL!	0	0		extracted	2010-05-25	0	0	0	2011-05-10	65	W	3	1	2010-05-25	2010-05-25	true	Anterior	9.54162	VitE	W	Anterior
435	44	2002-03-13	Group1	2002-03-13	2002-03-13	0	#NULL!	#NULL!	0	0		extracted	2005-06-15	2	0	0	2011-05-10	66	W	3	1	2005-06-15	2005-06-15	true	Premolars	3.25811	Trep1	W	Premolar
435	33	2002-06-26	Group1	2002-06-26	2002-06-26	0	#NULL!	#NULL!	0	0		0	#NULL!	3	0	0	2011-05-10	66	W	0	0	2011-05-10	2011-05-10	true	Anterior	8.87083	Trep1	W	Anterior
435	12	2007-12-13	Group1	2007-12-13	2008-01-31	1	#NULL!	#NULL!	0	0		extracted	2009-09-24	4	0	0	2011-05-10	72	W	3	1	2009-09-24	2009-09-24	false	Anterior	1.78238	Trep1	W	Anterior
436	15	2001-02-07	Group1	2001-02-07	2001-02-07	0	#NULL!	#NULL!	0	0		extracted	2001-09-10	0	0	0	2016-08-09	59	M	3	1	2001-09-10	2001-09-10	true	Premolars	0.588651	VitE	M	Premolar
436	14	2001-02-19	Group1	2001-02-19	2001-02-19	0	#NULL!	#NULL!	0	0		extracted	2005-06-29	1	0	0	2016-08-09	59	M	3	1	2005-06-29	2005-06-29	true	Premolars	4.35602	VitE	M	Premolar
436	13	2005-09-14	Group1	2005-09-14	2005-09-28	1	#NULL!	#NULL!	0	0		extracted	2008-08-14	2	0	0	2016-08-09	63	M	3	1	2008-08-14	2008-08-14	false	Anterior	2.91587	Trep1	M	Anterior
436	21	2009-02-05	Group1	2009-02-05	2009-03-31	2	#NULL!	#NULL!	0	0		extracted	2010-11-18	3	0	0	2016-08-09	67	M	3	1	2010-11-18	2010-11-18	false	Anterior	1.78238	Trep1	M	Anterior
436	34	2016-03-29	Group 3	2016-03-29	2016-04-05	1	#NULL!	#NULL!	0	0		0	#NULL!	4	0	0	2016-08-09	74	M	0	0	2016-08-09	2016-08-09	false	Premolars	0.364142	Trep1	M	Premolar
437	23	2001-11-22	Group1	2001-11-22	2001-12-19	3	#NULL!	#NULL!	0	0		extracted	2007-11-26	0	0	0	2012-05-22	71	M	3	1	2007-11-26	2007-11-26	false	Anterior	6.00971	VitE	M	Anterior
437	13	2009-05-13	Group1	2009-05-13	2009-06-09	3	#NULL!	#NULL!	0	0		0	#NULL!	1	0	0	2012-05-22	79	M	0	0	2012-05-22	2012-05-22	false	Anterior	3.02539	VitE	M	Anterior
438	34	1999-05-11	Group1	1999-05-11	1999-06-22	2	#NULL!	#NULL!	0	0		extracted	2006-06-29	0	0	0	2006-07-04	77	W	3	1	2006-06-29	2006-06-29	false	Premolars	7.135	Trep1	W	Premolar
439	21	2002-10-31	Group1	2002-10-31	2002-10-31	0	#NULL!	#NULL!	0	0		0	#NULL!	0	0	0	2009-01-13	76	M	0	0	2009-01-13	2009-01-13	true	Anterior	6.20411	VitE	M	Anterior
439	22	2008-04-15	Group1	2008-04-15	2008-04-15	0	#NULL!	#NULL!	0	0		0	#NULL!	3	0	0	2009-01-13	82	M	0	0	2009-01-13	2009-01-13	true	Anterior	0.74745	VitE	M	Anterior
440	46	2011-08-08	Group 2	2011-08-08	2011-08-16	1	#NULL!	#NULL!	0	0		extracted	2015-03-02	0	0	4	2016-04-13	45	W	3	1	2015-03-02	2015-03-02	false	Molars	3.56476	Trep1	W	Molar
441	36	2012-10-17	Group 3	2012-11-27	2013-01-22	2	#NULL!	#NULL!	0	0		0	#NULL!	0	0	6	2016-06-23	48	W	0	0	2016-06-23	2016-06-23	false	Molars	3.68249	VitE	W	Molar
441	27	2013-12-19	Group 3	2013-12-19	2014-02-27	1	#NULL!	#NULL!	0	0		0	#NULL!	1	0	3	2016-06-23	49	W	0	0	2016-06-23	2016-06-23	false	Molars	2.51066	VitE	W	Molar
442	23	2013-07-09	Group 3	2013-07-09	2013-07-09	0	#NULL!	#NULL!	0	0		0	#NULL!	0	0	7	2016-06-29	72	W	0	0	2016-06-29	2016-06-29	true	Anterior	2.97337	VitE	W	Anterior
443	15	2014-01-22	Group 3	2014-01-22	2014-02-18	1	#NULL!	#NULL!	0	0		0	#NULL!	0	0	1	2015-10-29	55	W	0	0	2015-10-29	2015-10-29	false	Premolars	1.76595	Trep1	W	Premolar
443	46	2014-02-26	Group 3	2014-02-26	2014-03-26	1	#NULL!	#NULL!	0	0		0	#NULL!	1	0	1	2015-10-29	55	W	0	0	2015-10-29	2015-10-29	false	Molars	1.67013	VitE	W	Molar
444	13	2015-11-09	Group 3	2015-11-09	2015-11-17	1	#NULL!	#NULL!	0	0		0	#NULL!	0	0	2	2016-07-07	82	W	0	0	2016-07-07	2016-07-07	false	Anterior	0.659836	Trep1	W	Anterior
445	32	2003-05-02	Group1	2003-05-02	2003-05-20	1	#NULL!	#NULL!	0	0		0	#NULL!	0	0	0	2004-03-17	51	W	0	0	2004-03-17	2004-03-17	false	Anterior	0.876131	VitE	W	Anterior
445	45	2003-11-18	Group1	2003-11-18	2003-12-02	1	#NULL!	#NULL!	0	0		0	#NULL!	1	0	0	2004-03-17	51	W	0	0	2004-03-17	2004-03-17	false	Premolars	0.328549	Trep1	W	Premolar
446	48	2000-12-05	Group1	2000-12-05	2001-01-16	2	#NULL!	#NULL!	0	0		0	#NULL!	0	0	0	2007-09-12	68	M	0	0	2007-09-12	2007-09-12	false	Molars	6.76812	VitE	M	Molar
447	27	2003-12-12	Group1	2005-02-01	2004-03-17	4	2005-02-01	5	retreatment	0		extracted	2006-01-18	0	0	0	2016-04-04	42	W	3	1	2006-01-18	2005-02-01	false	Molars	1.14171	VitE	W	Molar
448	25	2001-12-10	Group1	2001-12-10	2001-12-10	0	#NULL!	#NULL!	0	0		extracted	2004-12-14	0	0	0	2016-09-06	76	W	3	1	2004-12-14	2004-12-14	true	Premolars	3.0117	VitE	W	Premolar
448	47	2006-10-19	Group1	2006-10-19	2006-10-19	0	#NULL!	#NULL!	0	0		extracted	2013-09-17	2	0	2	2016-09-06	81	W	3	1	2013-09-17	2013-09-17	true	Molars	6.91322	VitE	W	Molar
448	13	2007-02-26	Group1	2007-02-26	2007-03-06	1	#NULL!	#NULL!	0	0		extracted	2011-06-16	3	0	0	2016-09-06	81	W	3	1	2011-06-16	2011-06-16	false	Anterior	4.30126	Trep1	W	Anterior
448	23	2010-10-29	Group 2	2010-10-29	2010-11-02	1	#NULL!	#NULL!	0	0		extracted	2011-06-27	4	0	0	2016-09-06	85	W	3	1	2011-06-27	2011-06-27	false	Anterior	0.659836	Trep1	W	Anterior
449	32	2000-08-03	Group1	2000-08-03	2000-08-10	1	#NULL!	#NULL!	0	0		0	#NULL!	0	0	0	2003-04-24	66	M	0	0	2003-04-24	2003-04-24	false	Anterior	2.72148	Trep1	M	Anterior
450	23	2005-04-18	Group1	2005-04-18	2005-05-12	1	#NULL!	#NULL!	0	0		extracted	2006-02-16	0	0	0	2016-08-26	71	M	3	1	2006-02-16	2006-02-16	false	Anterior	0.832325	Trep1	M	Anterior
451	17	2003-05-05	Group1	2003-05-05	2003-07-22	3	#NULL!	#NULL!	0	0		0	#NULL!	0	0	0	2004-12-16	44	W	0	0	2004-12-16	2004-12-16	false	Molars	1.61811	VitE	W	Molar
452	17	2003-07-11	Group1	2003-07-11	2003-08-14	4	#NULL!	#NULL!	0	0		extracted	2003-11-24	0	0	9	2016-08-31	36	W	3	1	2003-11-24	2003-11-24	false	Molars	0.372356	VitE	W	Molar
453	21	2006-12-15	Group1	#NULL!	2007-01-22	1	#NULL!	#NULL!	0	0		extracted	2009-01-12	0	0	0	2016-04-14	70	M	3	1	2009-01-12	2009-01-12	false	Anterior	2.07807	Trep1	M	Anterior
453	34	2015-09-30	Group 3	2015-09-30	2015-10-28	1	#NULL!	#NULL!	0	0		0	#NULL!	0	0	0	2016-04-14	79	M	0	0	2016-04-14	2016-04-14	false	Premolars	0.539368	Trep1	M	Premolar
454	17	2016-04-20	Group 3	2016-04-20	2016-07-06	1	#NULL!	#NULL!	0	0		0	#NULL!	1	0	1	2016-09-07	60	W	0	0	2016-09-07	2016-09-07	false	Molars	0.383308	VitE	W	Molar
455	47	2006-01-16	Group1	2006-01-16	2006-02-22	1	#NULL!	#NULL!	0	0		0	#NULL!	0	0	7	2016-05-24	41	M	0	0	2016-05-24	2016-05-24	false	Molars	10.352	VitE	M	Molar
455	26	2012-08-21	Group 3	2012-08-21	2012-09-19	1	#NULL!	#NULL!	0	0		extracted	2015-06-10	1	0	5	2016-05-24	48	M	3	1	2015-06-10	2015-06-10	false	Molars	2.80088	Trep1	M	Molar
455	15	2015-09-02	Group 3	2015-09-02	2015-09-10	1	#NULL!	#NULL!	0	0		0	#NULL!	2	0	2	2016-05-24	51	M	0	0	2016-05-24	2016-05-24	false	Premolars	0.725546	Trep1	M	Premolar
456	23	2011-05-05	Group 2	2011-05-05	2011-05-05	0	#NULL!	#NULL!	0	0		0	#NULL!	0	0	0	2013-06-17	74	W	0	0	2013-06-17	2013-06-17	true	Anterior	2.11914	VitE	W	Anterior
457	45	2013-03-07	Group 3	2013-03-07	2013-03-07	0	#NULL!	#NULL!	0	0		0	#NULL!	0	0	1	2013-09-05	80	W	0	0	2013-09-05	2013-09-05	true	Premolars	0.4983	VitE	W	Premolar
458	23	2001-03-12	Group1	2001-03-12	2001-03-12	0	#NULL!	#NULL!	0	0		extracted	2004-07-05	0	0	0	2014-05-15	76	M	3	1	2004-07-05	2004-07-05	true	Anterior	3.31561	VitE	M	Anterior
458	45	2006-03-20	Group1	2006-03-20	2006-04-03	1	#NULL!	#NULL!	0	0		extracted	2007-10-23	1	0	0	2014-05-15	81	M	3	1	2007-10-23	2007-10-23	false	Premolars	1.59346	Trep1	M	Premolar
458	44	2006-10-25	Group1	2006-10-25	2006-10-25	0	#NULL!	#NULL!	0	0		extracted	2008-12-02	2	0	0	2014-05-15	81	M	3	1	2008-12-02	2008-12-02	true	Premolars	2.10545	VitE	M	Premolar
458	21	2008-07-31	Group1	2008-07-31	2008-08-14	1	#NULL!	#NULL!	0	0		extracted	2009-08-13	3	0	0	2014-05-15	83	M	3	1	2009-08-13	2009-08-13	false	Anterior	1.03493	Trep1	M	Anterior
459	13	2004-05-11	Group1	2004-05-11	2004-05-12	1	#NULL!	#NULL!	0	0		extracted	2006-10-17	0	0	0	2009-11-11	80	M	3	1	2006-10-17	2006-10-17	false	Anterior	2.434	VitE	M	Anterior
459	21	2005-10-31	Group1	2005-10-31	2005-12-05	2	#NULL!	#NULL!	0	0		extracted	2009-10-08	1	0	0	2009-11-11	82	M	3	1	2009-10-08	2009-10-08	false	Anterior	3.93712	VitE	M	Anterior
459	22	2005-11-10	Group1	2005-11-10	2005-12-05	1	#NULL!	#NULL!	0	0		extracted	2009-08-27	2	0	0	2009-11-11	82	M	3	1	2009-08-27	2009-08-27	false	Anterior	3.79474	Trep1	M	Anterior
459	43	2008-05-08	Group1	2008-05-08	2008-06-16	3	#NULL!	#NULL!	0	0		0	#NULL!	3	0	0	2009-11-11	84	M	0	0	2009-11-11	2009-11-11	false	Anterior	1.51133	VitE	M	Anterior
459	33	2008-05-08	Group1	2008-05-08	2008-06-16	3	#NULL!	#NULL!	0	0		0	#NULL!	3	0	0	2009-11-11	84	M	0	0	2009-11-11	2009-11-11	false	Anterior	1.51133	VitE	M	Anterior
459	44	2008-08-26	Group1	2008-08-26	2008-08-26	0	#NULL!	#NULL!	0	0		0	#NULL!	5	0	0	2009-11-11	85	M	0	0	2009-11-11	2009-11-11	true	Premolars	1.21016	VitE	M	Premolar
460	11	2000-09-22	Group1	2000-09-22	2000-11-08	2	#NULL!	#NULL!	0	0		0	#NULL!	0	0	0	2016-07-20	39	M	0	0	2016-07-20	2016-07-20	false	Anterior	15.8251	Trep1	M	Anterior
460	47	2003-06-05	Group1	2003-06-05	2003-08-11	5	2006-08-17	1	0	root end surgery	WR	0	#NULL!	1	0	0	2016-07-20	42	M	2	1	2016-07-20	2006-08-17	false	Molars	3.20062	VitE	M	Molar
460	14	2011-03-10	Group 2	2011-03-10	2011-04-13	1	#NULL!	#NULL!	0	0		0	#NULL!	2	0	0	2016-07-20	50	M	0	0	2016-07-20	2016-07-20	false	Premolars	5.36357	VitE	M	Premolar
461	25	2009-02-16	Group1	2009-02-16	2009-02-16	0	2011-12-15	2	retreatment	0		extracted	2012-07-05	0	0	2	2016-04-13	48	M	3	1	2012-07-05	2011-12-15	true	Premolars	2.82552	Trep1	M	Premolar
462	46	2010-05-06	Group1	2010-05-06	2010-05-06	0	2011-07-15	2	retreatment	0		extracted	2011-10-17	0	0	8	2016-09-13	62	W	3	1	2011-10-17	2011-07-15	true	Molars	1.19099	Trep1	W	Molar
463	22	2001-11-02	Group1	2001-11-02	2001-11-02	0	#NULL!	#NULL!	0	0		0	#NULL!	0	0	0	2005-05-23	50	M	0	0	2005-05-23	2005-05-23	true	Anterior	3.55381	VitE	M	Anterior
463	21	2002-11-18	Group1	2002-11-18	2002-11-18	0	#NULL!	#NULL!	0	0		0	#NULL!	1	0	0	2005-05-23	51	M	0	0	2005-05-23	2005-05-23	true	Anterior	2.51066	VitE	M	Anterior
464	46	2014-05-09	Group 3	2014-05-09	2014-09-16	1	#NULL!	#NULL!	0	0		0	#NULL!	0	0	1	2016-04-11	33	M	0	0	2016-04-11	2016-04-11	false	Molars	1.92475	VitE	M	Molar
465	47	2000-06-05	Group1	2000-06-05	2000-06-28	1	#NULL!	#NULL!	0	0		0	#NULL!	0	0	0	2004-01-13	32	W	0	0	2004-01-13	2004-01-13	false	Molars	3.60583	VitE	W	Molar
466	46	2000-07-26	Group1	2000-07-26	2000-10-16	2	2009-05-11	11	0	root end surgery	WR	extracted	2016-03-15	0	0	0	2016-09-06	45	W	3	1	2016-03-15	2009-05-11	false	Molars	8.79143	Trep1	W	Molar
466	47	2016-03-21	Group 3	2016-03-21	2016-04-04	1	#NULL!	#NULL!	0	0		0	#NULL!	5	2	1	2016-09-06	61	W	0	0	2016-09-06	2016-09-06	false	Molars	0.462707	Trep1	W	Molar
467	36	2002-08-08	Group1	2002-08-08	2002-08-29	2	#NULL!	#NULL!	0	0		0	#NULL!	0	0	5	2016-01-14	54	W	0	0	2016-01-14	2016-01-14	false	Molars	13.4349	VitE	W	Molar
467	13	2004-06-01	Group1	2004-06-01	2004-07-14	3	#NULL!	#NULL!	0	0		0	#NULL!	1	0	5	2016-01-14	56	W	0	0	2016-01-14	2016-01-14	false	Anterior	11.6197	VitE	W	Anterior
467	26	2007-01-16	Group1	2007-01-16	2007-02-27	2	#NULL!	#NULL!	0	0		0	#NULL!	2	0	5	2016-01-14	59	W	0	0	2016-01-14	2016-01-14	false	Molars	8.99404	Trep1	W	Molar
468	17	2002-04-30	Group1	2002-04-30	2002-05-29	2	#NULL!	#NULL!	0	0		extracted	2003-06-18	0	0	0	2016-09-08	64	M	3	1	2003-06-18	2003-06-18	false	Molars	1.1335	Trep1	M	Molar
469	11	2003-08-15	Group1	2003-08-15	2003-09-09	1	#NULL!	#NULL!	0	0		0	#NULL!	1	0	0	2007-09-03	70	M	0	0	2007-09-03	2007-09-03	false	Anterior	4.05211	Trep1	M	Anterior
469	44	2006-09-06	Group1	2006-09-06	2006-09-27	1	#NULL!	#NULL!	0	0		0	#NULL!	2	0	0	2007-09-03	73	M	0	0	2007-09-03	2007-09-03	false	Premolars	0.991124	Trep1	M	Premolar
470	17	2000-05-18	Group1	2000-05-18	2000-07-11	2	#NULL!	#NULL!	0	0		0	#NULL!	0	0	0	2013-12-23	56	W	0	0	2013-12-23	2013-12-23	false	Molars	13.5992	VitE	W	Molar
470	11	2006-05-17	Group1	2006-05-17	2006-06-26	2	2011-01-24	3	0	root end surgery	WR	extracted	2011-02-23	1	0	0	2013-12-23	62	W	3	1	2011-02-23	2011-01-24	false	Anterior	4.69004	Trep1	W	Anterior
471	21	2012-07-31	Group 3	2012-07-31	2012-09-10	1	#NULL!	#NULL!	0	0		0	#NULL!	1	0	3	2016-09-22	75	M	0	0	2016-09-22	2016-09-22	false	Anterior	4.1452	VitE	M	Anterior
471	12	2012-07-31	Group 3	2012-07-31	2012-09-10	1	#NULL!	#NULL!	0	0		0	#NULL!	1	0	3	2016-09-22	75	M	0	0	2016-09-22	2016-09-22	false	Anterior	4.1452	Trep1	M	Anterior
471	11	2012-07-31	Group 3	2012-07-31	2012-09-10	1	#NULL!	#NULL!	0	0		0	#NULL!	1	0	3	2016-09-22	75	M	0	0	2016-09-22	2016-09-22	false	Anterior	4.1452	VitE	M	Anterior
472	14	2002-01-09	Group1	2002-01-09	2002-03-07	2	#NULL!	#NULL!	0	0		0	#NULL!	0	0	0	2009-10-29	82	W	0	0	2009-10-29	2009-10-29	false	Premolars	7.80305	Trep1	W	Premolar
472	27	2002-01-24	Group1	2002-01-24	2002-02-05	1	#NULL!	#NULL!	0	0		0	#NULL!	2	0	0	2009-10-29	82	W	0	0	2009-10-29	2009-10-29	false	Molars	7.76198	VitE	W	Molar
472	45	2005-07-05	Group1	2005-07-05	2005-07-05	0	#NULL!	#NULL!	0	0		extracted	2009-10-15	6	1	0	2009-10-29	85	W	3	1	2009-10-15	2009-10-15	true	Premolars	4.27935	Trep1	W	Premolar
472	26	2007-08-28	Group1	2007-08-28	2007-09-20	1	#NULL!	#NULL!	0	0		0	#NULL!	7	1	0	2009-10-29	87	W	0	0	2009-10-29	2009-10-29	false	Molars	2.17116	Trep1	W	Molar
473	47	1999-10-01	Group1	1999-10-01	1999-11-03	1	#NULL!	#NULL!	0	0		0	#NULL!	0	0	0	2014-07-30	56	M	0	0	2014-07-30	2014-07-30	false	Molars	14.8285	VitE	M	Molar
473	17	2000-10-09	Group1	2000-10-09	2000-11-13	1	#NULL!	#NULL!	0	0		extracted	2001-06-07	2	0	0	2014-07-30	57	M	3	1	2001-06-07	2001-06-07	false	Molars	0.659836	VitE	M	Molar
473	24	2001-10-17	Group1	2001-10-17	2001-10-31	1	#NULL!	#NULL!	0	0		0	#NULL!	3	0	0	2014-07-30	58	M	0	0	2014-07-30	2014-07-30	false	Premolars	12.7833	Trep1	M	Premolar
473	45	2008-11-05	Group 2	2008-11-05	2009-02-18	2	#NULL!	#NULL!	0	0		0	#NULL!	7	0	0	2014-07-30	65	M	0	0	2014-07-30	2014-07-30	false	Premolars	5.73045	Trep1	M	Premolar
474	25	2000-11-15	Group1	2000-11-15	2000-11-22	1	#NULL!	#NULL!	0	0		extracted	2003-02-19	0	0	0	2016-04-28	57	W	3	1	2003-02-19	2003-02-19	false	Premolars	2.26151	Trep1	W	Premolar
474	23	2004-09-03	Group1	2004-09-03	2004-09-03	0	#NULL!	#NULL!	0	0		extracted	2007-01-24	1	0	0	2016-04-28	61	W	3	1	2007-01-24	2007-01-24	true	Anterior	2.3902	VitE	W	Anterior
475	26	2003-12-22	Group1	2003-12-22	2004-07-14	2	#NULL!	#NULL!	0	0		0	#NULL!	0	0	0	2004-07-14	24	W	0	0	2004-07-14	2004-07-14	false	Molars	0.561272	VitE	W	Molar
476	47	2004-10-14	Group1	2004-10-14	2004-11-18	2	#NULL!	#NULL!	0	0		0	#NULL!	0	0	0	2010-05-05	35	W	0	0	2010-05-05	2010-05-05	false	Molars	5.55522	VitE	W	Molar
477	23	2003-03-31	Group1	2003-03-31	2003-03-31	0	#NULL!	#NULL!	0	0		0	#NULL!	0	0	7	2016-04-12	65	W	0	0	2016-04-12	2016-04-12	true	Anterior	13.0352	VitE	W	Anterior
477	33	2008-04-08	Group1	2008-04-08	2008-04-22	1	#NULL!	#NULL!	0	0		0	#NULL!	1	0	7	2016-04-12	70	W	0	0	2016-04-12	2016-04-12	false	Anterior	8.01113	VitE	W	Anterior
478	43	2002-05-14	Group1	2002-05-14	2003-01-15	3	#NULL!	#NULL!	0	0		extracted	2003-10-01	0	0	0	2016-09-15	62	W	3	1	2003-10-01	2003-10-01	false	Anterior	1.38264	VitE	W	Anterior
479	13	2000-03-02	Group1	2000-03-02	2002-03-05	5	#NULL!	#NULL!	0	0		extracted	2009-03-03	0	0	1	2015-11-13	48	W	3	1	2009-03-03	2009-03-03	false	Anterior	9.00225	Trep1	W	Anterior
479	24	2000-04-26	Group1	2000-04-26	2002-03-05	3	#NULL!	#NULL!	0	0		extracted	2015-10-26	1	0	1	2015-11-13	48	W	3	1	2015-10-26	2015-10-26	false	Premolars	15.4993	Trep1	W	Premolar
480	23	2006-05-03	Group1	2006-05-15	2006-05-15	0	#NULL!	#NULL!	0	0		extracted	2006-09-11	0	0	0	2006-11-06	68	W	3	1	2006-09-11	2006-09-11	true	Anterior	0.358666	VitE	W	Anterior
481	14	2008-07-22	Group 2	2008-07-22	2008-07-30	1	2008-08-20	2	retreatment	0		extracted	2010-10-14	0	0	0	2011-07-25	70	W	3	1	2010-10-14	2008-08-20	false	Premolars	0.0793994	VitE	W	Premolar
481	24	2008-09-03	Group1	2008-09-03	2008-09-03	0	#NULL!	#NULL!	0	0		0	#NULL!	2	0	0	2011-07-25	70	W	0	0	2011-07-25	2011-07-25	true	Premolars	2.8885	Trep1	W	Premolar
482	43	2005-09-26	Group1	2005-09-26	2005-10-10	1	#NULL!	#NULL!	0	0		0	#NULL!	1	0	0	2010-03-03	81	M	0	0	2010-03-03	2010-03-03	false	Anterior	4.43268	Trep1	M	Anterior
483	14	2010-12-09	Group 2	2010-12-09	2010-12-22	1	#NULL!	#NULL!	0	0		0	#NULL!	0	0	0	2016-05-19	52	M	0	0	2016-05-19	2016-05-19	false	Premolars	5.44297	VitE	M	Premolar
484	17	2007-04-05	Group1	2007-04-05	2007-09-18	6	#NULL!	#NULL!	0	0		0	#NULL!	0	0	0	2011-09-13	49	M	0	0	2011-09-13	2011-09-13	false	Molars	4.44089	VitE	M	Molar
485	25	2010-04-08	Group 2	2010-04-08	2010-06-30	3	#NULL!	#NULL!	0	0		0	#NULL!	1	0	0	2015-01-14	58	M	0	0	2015-01-14	2015-01-14	false	Premolars	4.76944	Trep1	M	Premolar
486	13	2012-07-25	Group 3	2012-07-25	2012-09-13	1	#NULL!	#NULL!	0	0		0	#NULL!	0	0	6	2016-05-23	56	W	0	0	2016-05-23	2016-05-23	false	Anterior	3.8276	VitE	W	Anterior
486	46	2014-03-12	Group 3	2014-03-12	2014-03-19	1	#NULL!	#NULL!	0	0		0	#NULL!	1	0	3	2016-05-23	58	W	0	0	2016-05-23	2016-05-23	false	Molars	2.19854	VitE	W	Molar
486	36	2016-01-20	Group 3	2016-01-20	2016-02-17	1	#NULL!	#NULL!	0	0		0	#NULL!	3	0	0	2016-05-23	60	W	0	0	2016-05-23	2016-05-23	false	Molars	0.339501	VitE	W	Molar
487	17	2003-03-06	Group1	2003-03-06	2003-04-23	3	#NULL!	#NULL!	0	0		0	#NULL!	0	0	0	2012-06-04	20	W	0	0	2012-06-04	2012-06-04	false	Molars	9.24866	VitE	W	Molar
488	43	2010-06-10	Group1	2010-06-10	2010-07-06	1	#NULL!	#NULL!	0	0		0	#NULL!	0	0	6	2016-03-14	72	W	0	0	2016-03-14	2016-03-14	false	Anterior	5.76056	VitE	W	Anterior
488	46	2013-11-19	Group 3	2013-11-19	2013-11-19	0	#NULL!	#NULL!	0	0		0	#NULL!	1	0	3	2016-03-14	76	W	0	0	2016-03-14	2016-03-14	true	Molars	2.31627	VitE	W	Molar
488	27	2015-11-26	Group 3	2015-11-26	2015-12-10	1	#NULL!	#NULL!	0	0		0	#NULL!	2	0	0	2016-03-14	78	W	0	0	2016-03-14	2016-03-14	false	Molars	0.298432	VitE	W	Molar
489	23	2002-04-29	Group1	2002-04-29	2002-04-29	0	#NULL!	#NULL!	0	0		extracted	2004-01-12	0	0	0	2004-01-14	78	W	3	1	2004-01-12	2004-01-12	true	Anterior	1.70572	Trep1	W	Anterior
489	13	2003-04-30	Group1	2003-04-30	2003-04-30	0	#NULL!	#NULL!	0	0		extracted	2003-10-13	1	0	0	2004-01-14	79	W	3	1	2003-10-13	2003-10-13	true	Anterior	0.454493	VitE	W	Anterior
490	32	2002-04-02	Group1	2002-04-02	2003-02-04	2	#NULL!	#NULL!	0	0		extracted	2004-06-03	0	0	0	2004-09-10	87	W	3	1	2004-06-03	2004-06-03	false	Anterior	2.17116	VitE	W	Anterior
490	43	2002-10-07	Group1	2002-10-07	2002-10-21	1	#NULL!	#NULL!	0	0		0	#NULL!	1	0	0	2004-09-10	87	W	0	0	2004-09-10	2004-09-10	false	Anterior	1.92749	VitE	W	Anterior
491	12	2002-06-11	Group1	2002-06-11	2002-06-11	0	#NULL!	#NULL!	0	0		extracted	2005-04-05	0	0	0	2010-02-01	57	M	3	1	2005-04-05	2005-04-05	true	Anterior	2.81731	Trep1	M	Anterior
491	46	2007-03-05	Group1	2007-03-05	2007-03-28	2	#NULL!	#NULL!	0	0		extracted	2009-06-10	1	0	0	2010-02-01	62	M	3	1	2009-06-10	2009-06-10	false	Molars	2.26699	VitE	M	Molar
492	17	2001-02-06	Group1	2001-02-06	2001-05-15	3	#NULL!	#NULL!	0	0		extracted	2007-06-12	0	0	0	2016-06-20	51	W	3	1	2007-06-12	2007-06-12	false	Molars	6.34374	VitE	W	Molar
493	12	2000-06-07	Group1	2000-06-07	2000-06-29	1	#NULL!	#NULL!	0	0		extracted	2004-10-20	0	0	0	2004-10-20	69	M	3	1	2004-10-20	2004-10-20	false	Anterior	4.36971	VitE	M	Anterior
494	27	2006-11-29	Group1	2006-11-29	2007-01-11	2	#NULL!	#NULL!	0	0		0	#NULL!	0	0	6	2016-07-13	48	W	0	0	2016-07-13	2016-07-13	false	Molars	9.62102	Trep1	W	Molar
495	23	2004-10-28	Group1	2004-10-28	2004-10-28	0	#NULL!	#NULL!	0	0		0	#NULL!	0	0	0	2010-01-18	66	W	0	0	2010-01-18	2010-01-18	true	Anterior	5.22393	VitE	W	Anterior
496	21	2013-06-12	Group 3	2013-06-12	2013-07-10	1	#NULL!	#NULL!	0	0		0	#NULL!	0	0	4	2016-08-22	71	M	0	0	2016-08-22	2016-08-22	false	Anterior	3.19514	Trep1	M	Anterior
497	13	2014-02-03	Group 3	2014-02-20	2014-02-20	0	#NULL!	#NULL!	0	0		0	#NULL!	0	0	6	2016-09-19	63	M	0	0	2016-09-19	2016-09-19	true	Anterior	2.62566	Trep1	M	Anterior
498	36	2001-05-09	Group1	2001-05-09	2001-05-09	0	#NULL!	#NULL!	0	0		0	#NULL!	0	0	10	2016-09-26	63	W	0	0	2016-09-26	2016-09-26	true	Molars	15.3843	VitE	W	Molar
498	24	2006-11-29	Group1	2006-11-29	2006-11-29	0	2008-06-24	1	retreatment	0		extracted	2008-07-29	1	0	10	2016-09-26	68	W	3	1	2008-07-29	2008-06-24	true	Premolars	1.56882	VitE	W	Premolar
498	23	2006-11-29	Group1	2006-11-29	2007-01-08	1	#NULL!	#NULL!	0	0		0	#NULL!	1	0	10	2016-09-26	68	W	0	0	2016-09-26	2016-09-26	false	Anterior	9.82636	VitE	W	Anterior
499	14	2004-05-26	Group1	2004-05-26	2004-06-02	1	#NULL!	#NULL!	0	0		extracted	2016-03-01	0	0	11	2016-07-12	56	W	3	1	2016-03-01	2016-03-01	false	Premolars	11.7648	VitE	W	Premolar
499	23	2015-04-28	Group 3	2015-04-28	2015-05-07	1	#NULL!	#NULL!	0	0		0	#NULL!	1	0	2	2016-07-12	67	W	0	0	2016-07-12	2016-07-12	false	Anterior	1.20742	Trep1	W	Anterior
500	22	2004-01-14	Group1	2004-01-14	2004-02-16	3	#NULL!	#NULL!	0	0		0	#NULL!	0	0	0	2006-02-20	71	W	0	0	2006-02-20	2006-02-20	false	Anterior	2.10272	Trep1	W	Anterior
500	35	2005-06-06	Group1	2005-06-06	2005-08-22	2	#NULL!	#NULL!	0	0		0	#NULL!	1	0	0	2006-02-20	72	W	0	0	2006-02-20	2006-02-20	false	Premolars	0.709119	Trep1	W	Premolar
501	47	2009-05-04	Group 2	2009-05-04	2009-05-28	1	#NULL!	#NULL!	0	0		0	#NULL!	0	0	0	2014-03-04	48	W	0	0	2014-03-04	2014-03-04	false	Molars	4.83241	VitE	W	Molar
502	36	2003-01-13	Group1	2003-01-13	2003-02-27	2	#NULL!	#NULL!	0	0		0	#NULL!	1	0	0	2005-06-02	25	M	0	0	2005-06-02	2005-06-02	false	Molars	2.38472	VitE	M	Molar
502	25	2005-03-01	Group1	2005-03-01	2005-04-12	1	#NULL!	#NULL!	0	0		0	#NULL!	2	0	0	2005-06-02	27	M	0	0	2005-06-02	2005-06-02	false	Premolars	0.254626	Trep1	M	Premolar
503	36	2012-02-29	Group 3	2012-02-29	2012-03-14	1	#NULL!	#NULL!	0	0		0	#NULL!	0	0	1	2016-08-16	56	W	0	0	2016-08-16	2016-08-16	false	Molars	4.46279	VitE	W	Molar
503	33	2012-03-12	Group 3	2012-03-12	2012-03-26	1	#NULL!	#NULL!	0	0		0	#NULL!	1	0	2	2016-08-16	56	W	0	0	2016-08-16	2016-08-16	false	Anterior	4.42994	Trep1	W	Anterior
504	23	2002-04-24	Group1	2002-04-24	2002-04-24	0	#NULL!	#NULL!	0	0		extracted	2004-05-05	0	0	0	2015-06-24	52	M	3	1	2004-05-05	2004-05-05	true	Anterior	2.03153	VitE	M	Anterior
504	44	2002-04-29	Group1	2002-04-29	2002-05-06	1	#NULL!	#NULL!	0	0		extracted	2002-12-02	1	0	0	2015-06-24	52	M	3	1	2002-12-02	2002-12-02	false	Premolars	0.594127	VitE	M	Premolar
504	34	2002-04-29	Group1	2002-04-29	2002-05-06	1	#NULL!	#NULL!	0	0		extracted	2002-12-02	1	0	0	2015-06-24	52	M	3	1	2002-12-02	2002-12-02	false	Premolars	0.594127	VitE	M	Premolar
504	32	2002-04-29	Group1	2002-04-29	2002-05-06	1	#NULL!	#NULL!	0	0		extracted	2002-12-02	1	0	0	2015-06-24	52	M	3	1	2002-12-02	2002-12-02	false	Anterior	0.594127	VitE	M	Anterior
504	33	2002-04-29	Group1	2002-04-29	2002-05-06	1	#NULL!	#NULL!	0	0		extracted	2004-03-15	1	0	0	2015-06-24	52	M	3	1	2004-03-15	2004-03-15	false	Anterior	1.87821	VitE	M	Anterior
504	43	2002-04-29	Group1	2002-04-29	2002-05-06	1	#NULL!	#NULL!	0	0		extracted	2015-03-23	1	0	0	2015-06-24	52	M	3	1	2015-03-23	2015-03-23	false	Anterior	12.8983	VitE	M	Anterior
505	45	2008-08-19	Group1	2008-08-19	2008-10-22	2	2013-01-07	2	retreatment	0		0	#NULL!	0	0	10	2016-05-23	51	W	1	1	2016-05-23	2013-01-07	false	Premolars	4.38613	Trep1	W	Premolar
506	21	2002-11-04	Group1	2002-11-04	2002-11-12	1	#NULL!	#NULL!	0	0		0	#NULL!	0	0	3	2015-08-26	48	W	0	0	2015-08-26	2015-08-26	false	Anterior	12.8079	VitE	W	Anterior
506	27	2005-07-25	Group1	2005-07-25	2005-12-15	2	#NULL!	#NULL!	0	0		0	#NULL!	1	0	3	2015-08-26	51	W	0	0	2015-08-26	2015-08-26	false	Molars	10.0865	Trep1	W	Molar
507	14	2014-04-17	Group 3	2014-04-17	2014-04-17	0	#NULL!	#NULL!	0	0		0	#NULL!	0	0	2	2016-05-17	58	M	0	0	2016-05-17	2016-05-17	true	Premolars	2.08355	VitE	M	Premolar
507	36	2015-11-04	Group 3	2015-11-04	2015-11-04	0	#NULL!	#NULL!	0	0		0	#NULL!	1	0	1	2016-05-17	59	M	0	0	2016-05-17	2016-05-17	true	Molars	0.533893	VitE	M	Molar
508	36	2000-05-23	Group1	2000-05-23	2000-07-03	3	#NULL!	#NULL!	0	0		0	#NULL!	0	0	2	2016-09-21	56	M	0	0	2016-09-21	2016-09-21	false	Molars	16.3316	Trep1	M	Molar
508	13	2014-09-22	Group 3	2014-10-16	2014-11-27	2	#NULL!	#NULL!	0	0		0	#NULL!	3	0	0	2016-09-21	71	M	0	0	2016-09-21	2016-09-21	false	Anterior	1.99867	Trep1	M	Anterior
509	37	2003-07-17	Group1	2003-07-17	2003-08-27	2	#NULL!	#NULL!	0	0		extracted	2005-08-25	0	0	0	2010-07-07	64	M	3	1	2005-08-25	2005-08-25	false	Molars	2.10819	VitE	M	Molar
509	12	2006-08-02	Group1	2006-08-02	2006-08-10	1	#NULL!	#NULL!	0	0		0	#NULL!	2	0	0	2010-07-07	67	M	0	0	2010-07-07	2010-07-07	false	Anterior	3.9289	Trep1	M	Anterior
509	25	2010-02-18	Group 2	2010-02-18	2010-03-04	1	#NULL!	#NULL!	0	0		0	#NULL!	4	0	0	2010-07-07	71	M	0	0	2010-07-07	2010-07-07	false	Premolars	0.38057	Trep1	M	Premolar
509	27	2010-03-17	Group 2	2010-03-17	2010-05-18	2	#NULL!	#NULL!	0	0		0	#NULL!	5	0	0	2010-07-07	71	M	0	0	2010-07-07	2010-07-07	false	Molars	0.306646	Trep1	M	Molar
510	35	2002-07-10	Group1	2002-07-10	2002-08-19	2	#NULL!	#NULL!	0	0		0	#NULL!	0	0	0	2010-01-18	51	M	0	0	2010-01-18	2010-01-18	false	Premolars	7.52652	Trep1	M	Premolar
510	15	2003-10-06	Group1	2003-10-06	2003-10-13	1	#NULL!	#NULL!	0	0		0	#NULL!	1	0	0	2010-01-18	53	M	0	0	2010-01-18	2010-01-18	false	Premolars	6.28624	Trep1	M	Premolar
510	17	2004-02-09	Group1	2004-02-09	2004-03-16	2	#NULL!	#NULL!	0	0		0	#NULL!	2	0	0	2010-01-18	53	M	0	0	2010-01-18	2010-01-18	false	Molars	5.94127	VitE	M	Molar
511	45	2002-02-15	Group1	2002-02-15	2002-03-04	2	#NULL!	#NULL!	0	0		extracted	2014-03-17	0	0	0	2014-04-15	72	W	3	1	2014-03-17	2014-03-17	false	Premolars	12.0824	Trep1	W	Premolar
511	43	2002-02-18	Group1	2002-02-18	2002-03-04	1	#NULL!	#NULL!	0	0		extracted	2014-03-17	1	0	0	2014-04-15	72	W	3	1	2014-03-17	2014-03-17	false	Anterior	12.0742	Trep1	W	Anterior
512	35	2001-05-07	Group1	2001-05-07	2001-08-28	5	#NULL!	#NULL!	0	0		0	#NULL!	0	0	8	2016-06-20	30	W	0	0	2016-06-20	2016-06-20	false	Premolars	15.1215	Trep1	W	Premolar
512	37	2014-03-10	Group 3	2014-03-10	2014-05-26	1	#NULL!	#NULL!	0	0		0	#NULL!	1	0	7	2016-06-20	43	W	0	0	2016-06-20	2016-06-20	false	Molars	2.28068	Trep1	W	Molar
513	11	2009-10-26	Group 2	2009-10-26	2009-10-26	0	#NULL!	#NULL!	0	0		extracted	2011-03-31	1	0	0	2015-04-07	64	W	3	1	2011-03-31	2011-03-31	true	Anterior	1.42645	VitE	W	Anterior
514	25	2011-04-06	Group 2	2011-05-02	2011-05-02	1	#NULL!	#NULL!	0	0		0	#NULL!	0	0	2	2016-08-02	68	W	0	0	2016-08-02	2016-08-02	true	Premolars	5.32524	VitE	W	Premolar
515	45	2001-06-29	Group1	2001-06-29	2001-12-05	1	#NULL!	#NULL!	0	0		0	#NULL!	0	0	0	2003-12-05	33	M	0	0	2003-12-05	2003-12-05	false	Premolars	2.434	Trep1	M	Premolar
516	16	2010-05-25	Group 2	2010-05-25	2010-08-25	1	#NULL!	#NULL!	0	0		0	#NULL!	0	0	0	2010-08-25	56	W	0	0	2010-08-25	2010-08-25	false	Molars	0.251888	Trep1	W	Molar
517	24	2002-08-07	Group1	2002-08-07	2003-08-28	6	#NULL!	#NULL!	0	0		0	#NULL!	0	0	0	2012-09-20	66	W	0	0	2012-09-20	2012-09-20	false	Premolars	10.1221	Trep1	W	Premolar
518	46	2000-08-07	Group1	2000-08-07	2000-08-07	0	#NULL!	#NULL!	0	0		extracted	2004-05-24	0	0	0	2016-09-15	46	M	3	1	2004-05-24	2004-05-24	true	Molars	3.79474	VitE	M	Molar
519	35	2008-10-13	Group 2	2008-10-27	2008-10-27	1	#NULL!	#NULL!	0	0		extracted	2012-01-26	0	0	0	2016-07-26	47	M	3	1	2012-01-26	2012-01-26	true	Premolars	3.28549	VitE	M	Premolar
520	45	1999-11-29	Group1	1999-11-29	2000-05-11	4	#NULL!	#NULL!	0	0		0	#NULL!	0	0	5	2016-09-12	54	W	0	0	2016-09-12	2016-09-12	false	Premolars	16.7889	Trep1	W	Premolar
520	16	2000-02-17	Group1	2000-02-17	2000-05-11	2	#NULL!	#NULL!	0	0		0	#NULL!	1	0	5	2016-09-12	54	W	0	0	2016-09-12	2016-09-12	false	Molars	16.5698	Trep1	W	Molar
520	46	2000-09-28	Group1	2000-09-28	2001-01-08	2	#NULL!	#NULL!	0	0		0	#NULL!	2	0	5	2016-09-12	55	W	0	0	2016-09-12	2016-09-12	false	Molars	15.9565	Trep1	W	Molar
520	24	2005-08-19	Group1	2005-08-19	2005-10-18	2	#NULL!	#NULL!	0	0		0	#NULL!	6	0	5	2016-09-12	60	W	0	0	2016-09-12	2016-09-12	false	Premolars	11.0666	Trep1	W	Premolar
520	36	2014-10-22	Group 3	2014-10-22	2014-11-18	2	#NULL!	#NULL!	0	0		0	#NULL!	7	0	1	2016-09-12	69	W	0	0	2016-09-12	2016-09-12	false	Molars	1.8919	Trep1	W	Molar
521	12	2001-03-19	Group1	2001-03-19	2001-03-26	1	2001-08-16	1	0	root end surgery	WR	0	#NULL!	0	0	0	2016-08-18	59	W	2	1	2016-08-18	2001-08-16	false	Anterior	0.410687	Trep1	W	Anterior
522	22	2003-02-04	Group1	2003-02-04	2003-02-18	1	#NULL!	#NULL!	0	0		0	#NULL!	0	0	0	2011-02-18	40	M	0	0	2011-02-18	2011-02-18	false	Anterior	8.03851	Trep1	M	Anterior
523	45	2006-10-23	Group1	2006-10-23	2006-10-30	1	#NULL!	#NULL!	0	0		0	#NULL!	0	0	0	2010-07-05	60	M	0	0	2010-07-05	2010-07-05	false	Premolars	3.69892	VitE	M	Premolar
523	27	2006-10-23	Group1	2006-10-23	2006-11-30	3	#NULL!	#NULL!	0	0		0	#NULL!	0	0	0	2010-07-05	60	M	0	0	2010-07-05	2010-07-05	false	Molars	3.69892	Trep1	M	Molar
524	27	2001-01-10	Group1	2001-01-10	2001-01-10	0	#NULL!	#NULL!	0	0		0	#NULL!	0	0	0	2010-07-08	82	M	0	0	2010-07-08	2010-07-08	true	Molars	9.4896	VitE	M	Molar
525	47	2003-05-21	Group1	2003-05-21	2003-06-04	1	#NULL!	#NULL!	0	0		0	#NULL!	0	0	0	2011-05-12	69	M	0	0	2011-05-12	2011-05-12	false	Molars	7.97553	Trep1	M	Molar
525	26	2007-03-13	Group1	2007-03-13	2007-04-03	1	#NULL!	#NULL!	0	0		extracted	2009-05-26	1	0	0	2011-05-12	73	M	3	1	2009-05-26	2009-05-26	false	Molars	2.20402	Trep1	M	Molar
525	12	2010-04-27	Group 2	2010-04-27	2010-04-27	0	#NULL!	#NULL!	0	0		0	#NULL!	2	0	0	2011-05-12	76	M	0	0	2011-05-12	2011-05-12	true	Anterior	1.04041	Trep1	M	Anterior
525	44	2010-10-21	Group 2	2010-10-21	2010-11-02	0	#NULL!	#NULL!	0	0		0	#NULL!	3	0	0	2011-05-12	76	M	0	0	2011-05-12	2011-05-12	false	Premolars	0.555796	Trep1	M	Premolar
525	43	2011-03-15	Group 2	2011-03-15	2011-03-22	1	#NULL!	#NULL!	0	0		0	#NULL!	4	0	0	2011-05-12	77	M	0	0	2011-05-12	2011-05-12	false	Anterior	0.158799	VitE	M	Anterior
526	45	2000-05-09	Group1	2000-05-09	2000-07-17	3	#NULL!	#NULL!	0	0		extracted	2000-11-15	0	0	5	2015-12-16	56	W	3	1	2000-11-15	2000-11-15	false	Premolars	0.520203	Trep1	W	Premolar
527	34	2004-03-01	Group1	2004-03-01	2004-03-22	3	#NULL!	#NULL!	0	0		extracted	2011-05-03	0	0	0	2014-05-23	63	W	3	1	2011-05-03	2011-05-03	false	Premolars	7.17059	Trep1	W	Premolar
527	13	2004-04-27	Group1	2004-04-27	2004-05-13	1	#NULL!	#NULL!	0	0		extracted	2011-05-03	1	0	0	2014-05-23	63	W	3	1	2011-05-03	2011-05-03	false	Anterior	7.01453	Trep1	W	Anterior
527	43	2004-07-22	Group1	2004-07-22	2004-07-22	0	#NULL!	#NULL!	0	0		extracted	2008-02-13	2	0	0	2014-05-23	63	W	3	1	2008-02-13	2008-02-13	true	Anterior	3.56202	VitE	W	Anterior
527	32	2004-08-16	Group1	2004-08-16	2004-08-16	0	2008-03-04	1	0	root end surgery	WR	extracted	2011-05-03	3	0	0	2014-05-23	63	W	3	1	2011-05-03	2008-03-04	true	Anterior	3.54833	VitE	W	Anterior
528	47	2009-07-09	Group1	2009-07-09	2009-08-06	1	2009-10-15	3	0	root end surgery	WR	0	#NULL!	0	0	7	2016-04-26	59	W	2	1	2016-04-26	2009-10-15	false	Molars	0.268315	Trep1	W	Molar
528	27	2009-09-08	Group1	2009-10-06	2009-10-06	2	#NULL!	#NULL!	0	0		extracted	2012-09-18	1	0	1	2016-04-26	60	W	3	1	2012-09-18	2012-09-18	true	Molars	3.02813	Trep1	W	Molar
528	26	2012-03-15	Group 3	2012-03-15	2012-08-20	2	#NULL!	#NULL!	0	0		0	#NULL!	3	1	7	2016-04-26	62	W	0	0	2016-04-26	2016-04-26	false	Molars	4.11508	VitE	W	Molar
529	23	2006-05-16	Group1	2006-05-16	2006-05-24	1	#NULL!	#NULL!	0	0		extracted	2010-03-17	0	0	0	2015-03-23	74	W	3	1	2010-03-17	2010-03-17	false	Anterior	3.83581	Trep1	W	Anterior
529	22	2006-05-16	Group1	2006-05-16	2006-05-24	1	#NULL!	#NULL!	0	0		extracted	2011-06-07	0	0	0	2015-03-23	74	W	3	1	2011-06-07	2011-06-07	false	Anterior	5.05966	Trep1	W	Anterior
529	11	2006-05-16	Group1	2006-05-16	2006-05-24	1	#NULL!	#NULL!	0	0		extracted	2011-06-07	0	0	0	2015-03-23	74	W	3	1	2011-06-07	2011-06-07	false	Anterior	5.05966	Trep1	W	Anterior
530	24	2002-01-04	Group1	2002-01-04	2002-01-30	3	#NULL!	#NULL!	0	0		0	#NULL!	0	0	0	2008-09-08	38	M	0	0	2008-09-08	2008-09-08	false	Premolars	6.67776	VitE	M	Premolar
530	26	2007-08-24	Group1	2007-08-24	2007-10-10	1	#NULL!	#NULL!	0	0		extracted	2008-09-08	1	0	0	2008-09-08	44	M	3	1	2008-09-08	2008-09-08	false	Molars	1.04314	VitE	M	Molar
531	16	2009-04-07	Group 2	2009-04-07	2009-10-20	2	#NULL!	#NULL!	0	0		0	#NULL!	0	0	4	2015-09-29	70	W	0	0	2015-09-29	2015-09-29	false	Molars	6.4779	VitE	W	Molar
531	25	2012-07-26	Group 3	2012-07-26	2012-08-23	2	#NULL!	#NULL!	0	0		0	#NULL!	2	0	3	2015-09-29	73	W	0	0	2015-09-29	2015-09-29	false	Premolars	3.17598	VitE	W	Premolar
531	24	2012-07-26	Group 3	2012-07-26	2012-08-23	2	#NULL!	#NULL!	0	0		0	#NULL!	2	0	3	2015-09-29	73	W	0	0	2015-09-29	2015-09-29	false	Premolars	3.17598	VitE	W	Premolar
531	15	2013-08-14	Group 3	2013-08-14	2013-08-14	0	#NULL!	#NULL!	0	0		0	#NULL!	4	0	2	2015-09-29	74	W	0	0	2015-09-29	2015-09-29	true	Premolars	2.12462	VitE	W	Premolar
532	38	2000-05-09	Group1	2000-05-09	2000-05-29	1	#NULL!	#NULL!	0	0		0	#NULL!	0	0	0	2003-11-05	33	W	0	0	2003-11-05	2003-11-05	false	Molars	3.49084	VitE	W	Molar
533	13	2007-03-26	Group1	2007-03-26	2007-04-16	2	#NULL!	#NULL!	0	0		0	#NULL!	0	0	0	2007-09-04	66	M	0	0	2007-09-04	2007-09-04	false	Anterior	0.443542	Trep1	M	Anterior
534	36	2004-04-01	Group1	2004-04-01	2004-05-06	3	#NULL!	#NULL!	0	0		0	#NULL!	1	0	0	2004-08-31	61	M	0	0	2004-08-31	2004-08-31	false	Molars	0.416162	VitE	M	Molar
535	13	2000-03-20	Group1	2000-03-20	2000-10-11	6	#NULL!	#NULL!	0	0		0	#NULL!	0	0	0	2016-04-11	51	M	0	0	2016-04-11	2016-04-11	false	Anterior	16.0606	Trep1	M	Anterior
535	15	2005-02-09	Group1	2005-02-09	2005-03-29	2	#NULL!	#NULL!	0	0		extracted	2010-02-09	1	0	0	2016-04-11	56	M	3	1	2010-02-09	2010-02-09	false	Premolars	4.99943	VitE	M	Premolar
536	21	2004-06-21	Group1	2004-06-21	2004-07-14	1	#NULL!	#NULL!	0	0		extracted	2012-12-05	0	0	1	2013-04-23	45	M	3	1	2012-12-05	2012-12-05	false	Anterior	8.45741	Trep1	M	Anterior
536	17	2004-09-30	Group1	2004-09-30	2004-10-05	1	#NULL!	#NULL!	0	0		extracted	2012-11-26	1	0	1	2013-04-23	45	M	3	1	2012-11-26	2012-11-26	false	Molars	8.15624	VitE	M	Molar
536	23	2004-11-17	Group1	2004-11-17	2005-02-02	1	2012-06-05	5	retreatment	0		extracted	2012-12-05	2	0	2	2013-04-23	45	M	3	1	2012-12-05	2012-06-05	false	Anterior	7.54842	Trep1	M	Anterior
536	24	2005-02-02	Group1	2005-02-02	2005-02-02	0	#NULL!	#NULL!	0	0		extracted	2009-06-15	3	0	0	2013-04-23	45	M	3	1	2009-06-15	2009-06-15	true	Premolars	4.36423	VitE	M	Premolar
536	34	2008-10-16	Group1	2008-10-16	2008-11-18	2	#NULL!	#NULL!	0	0		0	#NULL!	4	0	2	2013-04-23	49	M	0	0	2013-04-23	2013-04-23	false	Premolars	4.51755	VitE	M	Premolar
536	44	2013-01-30	Group 3	2013-01-30	2013-02-20	1	#NULL!	#NULL!	0	0		0	#NULL!	6	0	1	2013-04-23	53	M	0	0	2013-04-23	2013-04-23	false	Premolars	0.227247	Trep1	M	Premolar
537	26	2004-07-06	Group1	2004-07-06	2004-08-30	2	#NULL!	#NULL!	0	0		extracted	2014-10-22	0	0	4	2016-09-13	42	M	3	1	2014-10-22	2014-10-22	false	Molars	10.2945	Trep1	M	Molar
537	27	2005-07-01	Group1	2005-07-01	2005-11-29	2	#NULL!	#NULL!	0	0		extracted	2013-07-15	1	0	1	2016-09-13	43	M	3	1	2013-07-15	2013-07-15	false	Molars	8.03851	VitE	M	Molar
537	48	2008-01-04	Group1	2008-01-04	2008-09-04	4	#NULL!	#NULL!	0	0		0	#NULL!	2	0	7	2016-09-13	45	M	0	0	2016-09-13	2016-09-13	false	Molars	8.69287	Trep1	M	Molar
538	14	2003-08-26	Group1	2003-08-26	2003-08-26	0	#NULL!	#NULL!	0	0		0	#NULL!	0	0	0	2003-09-09	87	M	0	0	2003-09-09	2003-09-09	true	Premolars	0.0383308	Trep1	M	Premolar
539	11	2013-05-07	Group 3	2013-05-07	2013-05-07	0	#NULL!	#NULL!	0	0		0	#NULL!	0	0	6	2016-09-07	63	W	0	0	2016-09-07	2016-09-07	true	Anterior	3.33751	Trep1	W	Anterior
540	12	2009-12-18	Group 2	2009-12-18	2010-04-13	4	#NULL!	#NULL!	0	0		0	#NULL!	1	0	7	2016-04-13	65	W	0	0	2016-04-13	2016-04-13	false	Anterior	6.3191	Trep1	W	Anterior
540	34	2010-01-18	Group 2	2010-01-18	2010-07-21	6	#NULL!	#NULL!	0	0		0	#NULL!	2	0	7	2016-04-13	65	W	0	0	2016-04-13	2016-04-13	false	Premolars	6.23422	VitE	W	Premolar
541	46	2004-08-11	Group1	2004-08-11	2004-09-20	2	#NULL!	#NULL!	0	0		0	#NULL!	0	0	0	2006-10-19	65	W	0	0	2006-10-19	2006-10-19	false	Molars	2.18759	Trep1	W	Molar
542	14	2000-11-20	Group1	2000-11-20	2000-11-20	0	#NULL!	#NULL!	0	0		extracted	2008-08-14	0	0	0	2011-11-10	61	W	3	1	2008-08-14	2008-08-14	true	Premolars	7.73186	VitE	W	Premolar
543	22	2001-12-21	Group1	2001-12-21	2002-02-19	2	#NULL!	#NULL!	0	0		0	#NULL!	1	0	0	2003-08-06	60	M	0	0	2003-08-06	2003-08-06	false	Anterior	1.62358	VitE	M	Anterior
544	13	1999-11-12	Group1	1999-11-12	1999-11-12	0	#NULL!	#NULL!	0	0		0	#NULL!	0	0	9	2016-06-27	58	M	0	0	2016-06-27	2016-06-27	true	Anterior	16.6246	VitE	M	Anterior
544	17	2009-10-06	Group1	2009-10-06	2009-11-19	2	#NULL!	#NULL!	0	0		0	#NULL!	1	0	9	2016-06-27	68	M	0	0	2016-06-27	2016-06-27	false	Molars	6.72431	VitE	M	Molar
544	16	2015-09-09	Group 3	2015-09-09	2015-11-26	2	#NULL!	#NULL!	0	0		0	#NULL!	2	0	2	2016-06-27	74	M	0	0	2016-06-27	2016-06-27	false	Molars	0.79947	VitE	M	Molar
544	22	2015-11-10	Group 3	2015-11-10	2015-11-10	0	#NULL!	#NULL!	0	0		0	#NULL!	4	0	2	2016-06-27	74	M	0	0	2016-06-27	2016-06-27	true	Anterior	0.629719	VitE	M	Anterior
545	45	2013-11-29	Group 3	2013-11-29	2014-01-20	1	#NULL!	#NULL!	0	0		extracted	2015-06-23	0	0	2	2016-09-20	60	W	3	1	2015-06-23	2015-06-23	false	Premolars	1.56335	Trep1	W	Premolar
546	34	2004-03-05	Group1	2004-03-05	2004-07-26	2	#NULL!	#NULL!	0	0		0	#NULL!	0	0	1	2016-08-31	53	M	0	0	2016-08-31	2016-08-31	false	Premolars	12.4903	Trep1	M	Premolar
546	46	2005-12-12	Group1	2005-12-12	2006-01-11	2	#NULL!	#NULL!	0	0		0	#NULL!	1	0	1	2016-08-31	54	M	0	0	2016-08-31	2016-08-31	false	Molars	10.7189	VitE	M	Molar
547	27	2001-11-19	Group1	2001-11-19	2002-01-31	2	#NULL!	#NULL!	0	0		0	#NULL!	0	0	0	2004-06-08	51	M	0	0	2004-06-08	2004-06-08	false	Molars	2.55173	VitE	M	Molar
548	23	2004-08-09	Group1	2004-08-09	2004-09-13	2	#NULL!	#NULL!	0	0		0	#NULL!	0	0	0	2004-09-14	74	M	0	0	2004-09-14	2004-09-14	false	Anterior	0.0985648	Trep1	M	Anterior
549	44	2006-03-28	Group1	2006-03-28	2006-04-26	1	#NULL!	#NULL!	0	0		0	#NULL!	2	0	1	2015-12-30	45	M	0	0	2015-12-30	2015-12-30	false	Premolars	9.75791	Trep1	M	Premolar
549	14	2010-10-13	Group 2	2010-10-13	2010-11-03	1	#NULL!	#NULL!	0	0		0	#NULL!	3	0	1	2015-12-30	50	M	0	0	2015-12-30	2015-12-30	false	Premolars	5.21298	VitE	M	Premolar
550	26	2004-01-14	Group1	2004-01-14	2004-03-10	1	#NULL!	#NULL!	0	0		0	#NULL!	0	0	6	2014-02-07	50	M	0	0	2014-02-07	2014-02-07	false	Molars	10.0673	VitE	M	Molar
551	26	2000-07-18	Group1	2000-07-18	2000-12-14	4	#NULL!	#NULL!	0	0		0	#NULL!	0	0	0	2008-12-17	57	M	0	0	2008-12-17	2008-12-17	false	Molars	8.41634	Trep1	M	Molar
551	13	2003-07-10	Group1	2003-07-10	2003-08-13	2	#NULL!	#NULL!	0	0		0	#NULL!	1	0	0	2008-12-17	60	M	0	0	2008-12-17	2008-12-17	false	Anterior	5.44023	Trep1	M	Anterior
551	33	2003-11-15	Group1	2003-11-15	2004-03-18	1	#NULL!	#NULL!	0	0		extracted	2004-03-18	2	0	0	2008-12-17	61	M	3	1	2004-03-18	2004-03-18	false	Anterior	0.339501	Trep1	M	Anterior
552	21	2007-05-03	Group1	2007-05-03	2007-07-26	2	#NULL!	#NULL!	0	0		0	#NULL!	0	0	0	2007-07-26	39	M	0	0	2007-07-26	2007-07-26	false	Anterior	0.229985	Trep1	M	Anterior
553	27	2008-10-20	Group 2	2008-10-20	2008-11-17	2	#NULL!	#NULL!	0	0		extracted	2012-01-10	0	0	0	2016-06-08	50	W	3	1	2012-01-10	2012-01-10	false	Molars	3.22252	VitE	W	Molar
553	17	2009-03-11	Group1	2009-03-24	2009-03-24	0	#NULL!	#NULL!	0	0		extracted	2009-06-23	2	0	0	2016-06-08	51	W	3	1	2009-06-23	2009-06-23	true	Molars	0.284743	VitE	W	Molar
554	12	2009-01-29	Group1	2009-01-29	2009-03-05	1	#NULL!	#NULL!	0	0		0	#NULL!	0	0	3	2015-10-19	44	M	0	0	2015-10-19	2015-10-19	false	Anterior	6.71883	VitE	M	Anterior
555	17	2000-04-05	Group1	2000-04-05	2000-08-17	4	#NULL!	#NULL!	0	0		extracted	2005-05-31	0	0	0	2005-05-31	50	W	3	1	2005-05-31	2005-05-31	false	Molars	5.15275	Trep1	W	Molar
556	37	2004-11-22	Group1	2004-11-22	2005-02-16	3	#NULL!	#NULL!	0	0		0	#NULL!	0	0	0	2014-08-20	41	M	0	0	2014-08-20	2014-08-20	false	Molars	9.74149	VitE	M	Molar
557	33	2000-07-31	Group1	2000-07-31	2000-10-05	3	#NULL!	#NULL!	0	0		0	#NULL!	0	0	7	2016-03-21	47	M	0	0	2016-03-21	2016-03-21	false	Anterior	15.6389	VitE	M	Anterior
558	15	2015-03-23	Group 3	2015-03-23	2015-05-27	1	#NULL!	#NULL!	0	0		0	#NULL!	0	0	2	2016-07-06	38	M	0	0	2016-07-06	2016-07-06	false	Premolars	1.28956	VitE	M	Premolar
559	21	2002-09-24	Group1	2002-09-24	2002-09-24	0	#NULL!	#NULL!	0	0		0	#NULL!	0	0	0	2006-02-23	59	W	0	0	2006-02-23	2006-02-23	true	Anterior	3.41691	Trep1	W	Anterior
559	33	2005-11-10	Group1	2005-11-10	2006-01-10	2	#NULL!	#NULL!	0	0		0	#NULL!	1	0	0	2006-02-23	62	W	0	0	2006-02-23	2006-02-23	false	Anterior	0.287481	Trep1	W	Anterior
560	27	2004-11-16	Group1	2004-11-16	2004-11-25	1	#NULL!	#NULL!	0	0		extracted	2006-10-25	2	0	0	2016-06-16	50	W	3	1	2006-10-25	2006-10-25	false	Molars	1.93844	Trep1	W	Molar
560	47	2006-01-31	Group1	2006-01-31	2006-03-14	1	#NULL!	#NULL!	0	0		extracted	2012-08-13	3	0	1	2016-06-16	52	W	3	1	2012-08-13	2012-08-13	false	Molars	6.53266	Trep1	W	Molar
560	45	2006-01-31	Group1	2006-01-31	2006-03-14	1	#NULL!	#NULL!	0	0		0	#NULL!	3	0	10	2016-06-16	52	W	0	0	2016-06-16	2016-06-16	false	Premolars	10.3739	Trep1	W	Premolar
560	24	2009-05-26	Group 2	2009-05-26	2009-07-09	1	#NULL!	#NULL!	0	0		extracted	2013-01-30	5	0	8	2016-06-16	55	W	3	1	2013-01-30	2013-01-30	false	Premolars	3.68249	Trep1	W	Premolar
560	48	2012-09-20	Group 3	2012-09-20	2012-09-20	0	#NULL!	#NULL!	0	0		extracted	2015-07-08	6	0	5	2016-06-16	58	W	3	1	2015-07-08	2015-07-08	true	Molars	2.79541	VitE	W	Molar
561	46	2010-02-22	Group 2	2010-03-22	2010-04-14	2	#NULL!	#NULL!	0	0		0	#NULL!	1	0	8	2016-02-18	72	W	0	0	2016-02-18	2016-02-18	false	Molars	5.98781	Trep1	W	Molar
562	44	1999-09-21	Group1	1999-09-21	1999-10-07	1	#NULL!	#NULL!	0	0		0	#NULL!	0	0	0	2009-11-30	65	W	0	0	2009-11-30	2009-11-30	false	Premolars	10.1932	Trep1	W	Premolar
562	45	1999-10-07	Group1	1999-10-07	1999-10-07	0	#NULL!	#NULL!	0	0		extracted	2000-02-01	1	0	0	2009-11-30	65	W	3	1	2000-02-01	2000-02-01	true	Premolars	0.320336	Trep1	W	Premolar
563	17	2000-03-15	Group1	2000-03-15	2000-08-22	4	#NULL!	#NULL!	0	0		0	#NULL!	0	0	0	2010-05-19	64	M	0	0	2010-05-19	2010-05-19	false	Molars	10.1768	Trep1	M	Molar
563	44	2008-06-03	Group1	2008-06-03	2008-07-15	2	#NULL!	#NULL!	0	0		0	#NULL!	2	0	0	2010-05-19	72	M	0	0	2010-05-19	2010-05-19	false	Premolars	1.95761	Trep1	M	Premolar
563	35	2009-09-18	Group 2	2009-09-18	2009-11-03	2	#NULL!	#NULL!	0	0		0	#NULL!	3	0	0	2010-05-19	74	M	0	0	2010-05-19	2010-05-19	false	Premolars	0.665312	VitE	M	Premolar
564	35	2010-01-04	Group 2	2010-01-04	2010-02-09	2	#NULL!	#NULL!	0	0		0	#NULL!	0	0	7	2016-03-10	70	M	0	0	2016-03-10	2016-03-10	false	Premolars	6.17946	Trep1	M	Premolar
565	21	2009-08-19	Group 2	2009-08-19	2009-09-10	1	#NULL!	#NULL!	0	0		0	#NULL!	0	0	0	2012-01-19	86	M	0	0	2012-01-19	2012-01-19	false	Anterior	2.41758	VitE	M	Anterior
565	11	2009-08-19	Group 2	2009-08-19	2009-09-10	1	#NULL!	#NULL!	0	0		0	#NULL!	0	0	0	2012-01-19	86	M	0	0	2012-01-19	2012-01-19	false	Anterior	2.41758	VitE	M	Anterior
566	44	2016-02-04	Group 3	2016-02-04	2016-02-11	1	#NULL!	#NULL!	0	0		0	#NULL!	0	0	0	2016-03-22	63	W	0	0	2016-03-22	2016-03-22	false	Premolars	0.128682	Trep1	W	Premolar
567	26	1999-10-04	Group1	1999-10-04	1999-10-04	0	2000-03-27	2	retreatment	0		extracted	2009-06-23	0	0	0	2015-09-04	59	M	3	1	2009-06-23	2000-03-27	true	Molars	0.479134	VitE	M	Molar
567	37	2005-03-30	Group1	2005-03-30	2005-04-27	1	#NULL!	#NULL!	0	0		0	#NULL!	2	0	7	2015-09-04	64	M	0	0	2015-09-04	2015-09-04	false	Molars	10.4314	VitE	M	Molar
568	15	2003-10-17	Group1	2003-10-17	2003-10-29	3	#NULL!	#NULL!	0	0		extracted	2006-03-01	0	0	0	2014-04-22	73	M	3	1	2006-03-01	2006-03-01	false	Premolars	2.37103	Trep1	M	Premolar
568	24	2005-01-10	Group1	2005-01-10	2005-02-16	2	2005-05-19	2	retreatment	0		extracted	2005-11-14	1	0	0	2014-04-22	74	M	3	1	2005-11-14	2005-05-19	false	Premolars	0.35319	Trep1	M	Premolar
569	37	2003-05-29	Group1	2003-05-29	2003-09-09	4	#NULL!	#NULL!	0	0		extracted	2012-05-24	0	0	6	2016-06-09	58	M	3	1	2012-05-24	2012-05-24	false	Molars	8.98856	Trep1	M	Molar
570	26	2010-04-06	Group 2	2010-04-06	2010-05-04	1	#NULL!	#NULL!	0	0		0	#NULL!	0	0	0	2016-09-06	72	M	0	0	2016-09-06	2016-09-06	false	Molars	6.4204	Trep1	M	Molar
570	13	2013-08-14	Group 3	2013-08-14	2013-08-14	0	#NULL!	#NULL!	0	0		0	#NULL!	1	0	0	2016-09-06	76	M	0	0	2016-09-06	2016-09-06	true	Anterior	3.06372	Trep1	M	Anterior
570	12	2013-08-14	Group 3	2013-08-14	2013-08-14	0	#NULL!	#NULL!	0	0		0	#NULL!	1	0	0	2016-09-06	76	M	0	0	2016-09-06	2016-09-06	true	Anterior	3.06372	Trep1	M	Anterior
571	21	2003-04-16	Group1	2003-04-16	2003-05-05	1	#NULL!	#NULL!	0	0		extracted	2004-04-28	0	0	0	2016-09-08	77	W	3	1	2004-04-28	2004-04-28	false	Anterior	1.03493	Trep1	W	Anterior
572	13	2008-03-26	Group1	2008-03-26	2008-04-08	1	#NULL!	#NULL!	0	0		0	#NULL!	0	0	0	2015-03-30	75	M	0	0	2015-03-30	2015-03-30	false	Anterior	7.00905	Trep1	M	Anterior
573	12	2015-06-09	Group 3	2015-06-09	2015-06-30	1	#NULL!	#NULL!	0	0		extracted	2015-10-21	0	0	0	2016-08-30	77	W	3	1	2015-10-21	2015-10-21	false	Anterior	0.36688	VitE	W	Anterior
574	36	2002-12-23	Group1	2002-12-23	2003-01-29	2	#NULL!	#NULL!	0	0		0	#NULL!	0	0	0	2003-05-13	29	W	0	0	2003-05-13	2003-05-13	false	Molars	0.386045	Trep1	W	Molar
575	27	2004-01-29	Group1	2004-01-29	2004-02-10	1	#NULL!	#NULL!	0	0		0	#NULL!	0	0	2	2016-06-14	60	W	0	0	2016-06-14	2016-06-14	false	Molars	12.3754	VitE	W	Molar
575	43	2006-04-06	Group1	2006-04-06	2006-04-06	0	#NULL!	#NULL!	0	0		0	#NULL!	1	0	2	2016-06-14	62	W	0	0	2016-06-14	2016-06-14	true	Anterior	10.1905	Trep1	W	Anterior
575	23	2013-07-30	Group 3	2013-07-30	2013-07-30	0	#NULL!	#NULL!	0	0		0	#NULL!	2	0	2	2016-06-14	70	W	0	0	2016-06-14	2016-06-14	true	Anterior	2.87481	VitE	W	Anterior
575	35	2013-09-09	Group 3	2013-09-09	2013-09-09	0	#NULL!	#NULL!	0	0		extracted	2014-05-07	3	0	0	2016-06-14	70	W	3	1	2014-05-07	2014-05-07	true	Premolars	0.657099	VitE	W	Premolar
575	16	2013-09-23	Group 3	2013-09-23	2014-05-27	1	#NULL!	#NULL!	0	0		0	#NULL!	4	0	2	2016-06-14	70	W	0	0	2016-06-14	2016-06-14	false	Molars	2.72422	Trep1	W	Molar
576	21	2000-07-25	Group1	2000-07-25	2000-07-25	0	#NULL!	#NULL!	0	0		extracted	2010-04-06	0	0	0	2015-01-13	59	W	3	1	2010-04-06	2010-04-06	true	Anterior	9.69768	Trep1	W	Anterior
576	13	2001-04-19	Group1	2001-04-19	2001-04-19	0	#NULL!	#NULL!	0	0		extracted	2002-10-31	1	0	0	2015-01-13	60	W	3	1	2002-10-31	2002-10-31	true	Anterior	1.53323	Trep1	W	Anterior
576	12	2003-09-25	Group1	2003-09-25	2003-11-04	2	2004-02-04	2	retreatment	0		extracted	2005-10-06	3	0	0	2015-01-13	62	W	3	1	2005-10-06	2004-02-04	false	Anterior	0.361404	Trep1	W	Anterior
576	23	2008-12-09	Group1	2008-12-09	2008-12-16	1	#NULL!	#NULL!	0	0		extracted	2009-07-21	5	0	0	2015-01-13	67	W	3	1	2009-07-21	2009-07-21	false	Anterior	0.613292	Trep1	W	Anterior
577	16	2002-07-29	Group1	2002-07-29	2002-08-08	1	#NULL!	#NULL!	0	0		extracted	2002-08-28	0	0	5	2016-02-04	42	W	3	1	2002-08-28	2002-08-28	false	Molars	0.0821373	Trep1	W	Molar
577	26	2013-03-11	Group 3	2013-03-19	2013-04-15	2	#NULL!	#NULL!	0	0		0	#NULL!	2	0	4	2016-02-04	52	W	0	0	2016-02-04	2016-02-04	false	Molars	2.90219	Trep1	W	Molar
578	24	2004-08-12	Group1	2004-08-12	2004-08-12	0	#NULL!	#NULL!	0	0		extracted	2005-10-13	1	0	0	2012-02-03	61	M	3	1	2005-10-13	2005-10-13	true	Premolars	1.16909	Trep1	M	Premolar
578	36	2006-12-15	Group1	2007-02-13	2007-02-13	3	#NULL!	#NULL!	0	0		0	#NULL!	2	0	1	2012-02-03	64	M	0	0	2012-02-03	2012-02-03	true	Molars	5.13632	Trep1	M	Molar
579	42	2014-03-20	Group 3	2014-03-20	2014-03-20	0	#NULL!	#NULL!	0	0		0	#NULL!	0	0	0	2016-09-13	64	W	0	0	2016-09-13	2016-09-13	true	Anterior	2.48602	VitE	W	Anterior
580	23	2002-12-12	Group1	2002-12-12	2003-01-28	1	#NULL!	#NULL!	0	0		extracted	2009-09-24	0	0	0	2016-03-21	67	W	3	1	2009-09-24	2009-09-24	false	Anterior	6.78454	Trep1	W	Anterior
580	45	2004-12-09	Group1	2004-12-09	2005-02-01	2	#NULL!	#NULL!	0	0		extracted	2005-05-12	2	0	0	2016-03-21	69	W	3	1	2005-05-12	2005-05-12	false	Premolars	0.421638	VitE	W	Premolar
580	13	2005-04-14	Group1	2005-04-14	2005-05-10	4	#NULL!	#NULL!	0	0		extracted	2015-02-25	3	0	0	2016-03-21	69	W	3	1	2015-02-25	2015-02-25	false	Anterior	9.86743	Trep1	W	Anterior
581	48	2015-02-03	Group 3	2015-02-03	2015-02-25	2	#NULL!	#NULL!	0	0		0	#NULL!	0	0	2	2015-11-11	84	M	0	0	2015-11-11	2015-11-11	false	Molars	0.769353	Trep1	M	Molar
582	47	2002-04-18	Group1	2002-04-18	2002-05-13	2	#NULL!	#NULL!	0	0		0	#NULL!	0	0	0	2006-01-03	56	M	0	0	2006-01-03	2006-01-03	false	Molars	3.71261	VitE	M	Molar
583	25	2006-06-22	Group1	2006-06-22	2006-07-13	2	#NULL!	#NULL!	0	0		extracted	2016-09-15	0	0	5	2016-09-15	32	W	3	1	2016-09-15	2016-09-15	false	Premolars	10.2343	VitE	W	Premolar
583	26	2012-03-16	Group 3	2012-03-16	2012-06-05	3	2014-04-10	3	retreatment	0		0	#NULL!	1	0	4	2016-09-15	38	W	1	1	2016-09-15	2014-04-10	false	Molars	2.06712	Trep1	W	Molar
584	45	2001-06-07	Group1	2001-06-07	2001-07-19	2	#NULL!	#NULL!	0	0		extracted	2004-02-09	0	0	0	2010-08-03	51	M	3	1	2004-02-09	2004-02-09	false	Premolars	2.67494	VitE	M	Premolar
585	17	2002-12-20	Group1	2002-12-20	2003-05-20	1	#NULL!	#NULL!	0	0		0	#NULL!	0	0	0	2004-11-30	68	M	0	0	2004-11-30	2004-11-30	false	Molars	1.94665	Trep1	M	Molar
585	27	2003-02-06	Group1	2003-06-04	2003-06-17	1	#NULL!	#NULL!	0	0		0	#NULL!	2	0	0	2004-11-30	68	M	0	0	2004-11-30	2004-11-30	false	Molars	1.81523	Trep1	M	Molar
586	47	2007-10-25	Group1	2007-10-25	2007-11-08	1	#NULL!	#NULL!	0	0		0	#NULL!	0	0	9	2016-06-27	66	W	0	0	2016-06-27	2016-06-27	false	Molars	8.6737	Trep1	W	Molar
586	32	2013-10-22	Group 3	2013-10-22	2013-10-22	0	#NULL!	#NULL!	0	0		0	#NULL!	1	0	5	2016-06-27	72	W	0	0	2016-06-27	2016-06-27	true	Anterior	2.68041	VitE	W	Anterior
587	42	2005-05-23	Group1	2005-05-23	2005-05-23	0	#NULL!	#NULL!	0	0		0	#NULL!	0	0	0	2011-10-14	68	W	0	0	2011-10-14	2011-10-14	true	Anterior	6.39302	VitE	W	Anterior
587	13	2007-03-06	Group1	2007-03-06	2007-03-13	1	#NULL!	#NULL!	0	0		0	#NULL!	1	0	0	2011-10-14	70	W	0	0	2011-10-14	2011-10-14	false	Anterior	4.6079	Trep1	W	Anterior
588	15	2009-08-20	Group 2	2009-08-20	2009-10-20	1	#NULL!	#NULL!	0	0		extracted	2015-05-20	0	0	1	2016-03-07	71	W	3	1	2015-05-20	2015-05-20	false	Premolars	5.74687	VitE	W	Premolar
588	12	2010-05-04	Group 2	2010-05-04	2010-06-23	2	#NULL!	#NULL!	0	0		extracted	2013-09-30	1	0	1	2016-03-07	72	W	3	1	2013-09-30	2013-09-30	false	Anterior	3.4087	VitE	W	Anterior
588	35	2015-06-19	Group 3	2015-06-19	2015-07-14	1	#NULL!	#NULL!	0	0		0	#NULL!	2	0	0	2016-03-07	77	W	0	0	2016-03-07	2016-03-07	false	Premolars	0.717333	VitE	W	Premolar
589	42	2004-01-13	Group1	2004-01-13	2004-01-27	1	#NULL!	#NULL!	0	0		extracted	2007-11-13	0	0	5	2015-12-09	60	M	3	1	2007-11-13	2007-11-13	false	Anterior	3.83308	Trep1	M	Anterior
589	32	2004-08-25	Group1	2004-08-25	2004-09-22	2	#NULL!	#NULL!	0	0		extracted	2010-03-09	1	0	5	2015-12-09	61	M	3	1	2010-03-09	2010-03-09	false	Anterior	5.53606	Trep1	M	Anterior
589	41	2008-03-10	Group1	2008-03-10	2008-04-02	1	#NULL!	#NULL!	0	0		extracted	2010-06-16	2	0	0	2015-12-09	64	M	3	1	2010-06-16	2010-06-16	false	Anterior	2.26699	Trep1	M	Anterior
589	31	2008-03-10	Group1	2008-03-10	2008-04-02	1	#NULL!	#NULL!	0	0		extracted	2010-06-16	2	0	0	2015-12-09	64	M	3	1	2010-06-16	2010-06-16	false	Anterior	2.26699	Trep1	M	Anterior
590	25	2002-08-29	Group1	2002-08-29	2002-11-19	6	#NULL!	#NULL!	0	0		0	#NULL!	0	0	10	2016-03-03	28	M	0	0	2016-03-03	2016-03-03	false	Premolars	13.5116	Trep1	M	Premolar
590	46	2007-07-09	Group1	2007-07-09	2007-08-14	3	#NULL!	#NULL!	0	0		extracted	2008-02-13	1	0	9	2016-03-03	33	M	3	1	2008-02-13	2008-02-13	false	Molars	0.599602	Trep1	M	Molar
590	26	2015-07-14	Group 3	2015-07-14	2015-08-06	2	#NULL!	#NULL!	0	0		0	#NULL!	2	0	1	2016-03-03	41	M	0	0	2016-03-03	2016-03-03	false	Molars	0.637933	Trep1	M	Molar
590	17	2015-12-30	Group 3	2015-12-30	2016-02-04	1	#NULL!	#NULL!	0	0		0	#NULL!	3	0	0	2016-03-03	42	M	0	0	2016-03-03	2016-03-03	false	Molars	0.175226	Trep1	M	Molar
591	23	2011-02-15	Group 2	2011-02-15	2011-03-01	1	#NULL!	#NULL!	0	0		0	#NULL!	0	0	10	2016-04-26	65	W	0	0	2016-04-26	2016-04-26	false	Anterior	5.19382	Trep1	W	Anterior
592	35	2006-02-21	Group1	2006-02-21	2006-03-23	2	2011-10-25	2	retreatment	0		0	#NULL!	0	0	6	2016-01-22	54	W	1	1	2016-01-22	2011-10-25	false	Premolars	5.67295	Trep1	W	Premolar
593	12	2002-07-24	Group1	2002-07-24	2002-07-24	0	#NULL!	#NULL!	0	0		0	#NULL!	0	0	0	2013-01-31	81	M	0	0	2013-01-31	2013-01-31	true	Anterior	10.5245	VitE	M	Anterior
593	42	2011-06-24	Group 2	2011-06-24	2011-09-22	2	#NULL!	#NULL!	0	0		0	#NULL!	1	0	0	2013-01-31	90	M	0	0	2013-01-31	2013-01-31	false	Anterior	1.60715	VitE	M	Anterior
593	32	2011-10-27	Group1	2011-10-27	2011-11-08	1	#NULL!	#NULL!	0	0		0	#NULL!	3	0	0	2013-01-31	91	M	0	0	2013-01-31	2013-01-31	false	Anterior	1.26491	VitE	M	Anterior
594	23	2006-01-10	Group1	2006-01-10	2006-01-10	0	#NULL!	#NULL!	0	0		extracted	2006-09-19	0	0	0	2008-05-19	79	M	3	1	2006-09-19	2006-09-19	true	Anterior	0.689954	VitE	M	Anterior
595	43	2006-01-10	Group1	2006-01-10	2006-01-30	1	#NULL!	#NULL!	0	0		0	#NULL!	0	0	0	2006-12-21	48	M	0	0	2006-12-21	2006-12-21	false	Anterior	0.944579	Trep1	M	Anterior
596	35	1999-08-16	Group1	1999-08-16	1999-09-14	2	#NULL!	#NULL!	0	0		0	#NULL!	0	0	0	2006-09-26	67	M	0	0	2006-09-26	2006-09-26	false	Premolars	7.11309	VitE	M	Premolar
596	34	1999-09-20	Group1	1999-09-20	1999-09-20	0	#NULL!	#NULL!	0	0		0	#NULL!	1	0	0	2006-09-26	67	M	0	0	2006-09-26	2006-09-26	true	Premolars	7.01727	Trep1	M	Premolar
596	33	2005-05-09	Group1	2005-05-09	2005-05-25	1	#NULL!	#NULL!	0	0		0	#NULL!	3	0	0	2006-09-26	73	M	0	0	2006-09-26	2006-09-26	false	Anterior	1.38264	Trep1	M	Anterior
597	22	1999-11-09	Group1	1999-11-09	1999-11-09	0	#NULL!	#NULL!	0	0		extracted	2003-07-28	0	0	0	2005-05-10	55	M	3	1	2003-07-28	2003-07-28	true	Anterior	3.71534	VitE	M	Anterior
597	23	2000-06-13	Group1	2000-06-13	2000-06-27	2	#NULL!	#NULL!	0	0		extracted	2002-10-21	1	0	0	2005-05-10	56	M	3	1	2002-10-21	2002-10-21	false	Anterior	2.3546	Trep1	M	Anterior
598	34	2012-10-16	Group 3	2012-10-16	2012-10-25	1	#NULL!	#NULL!	0	0		0	#NULL!	0	0	2	2016-04-21	73	M	0	0	2016-04-21	2016-04-21	false	Premolars	3.51274	VitE	M	Premolar
598	15	2012-11-13	Group 3	2012-11-13	2012-11-15	1	#NULL!	#NULL!	0	0		0	#NULL!	1	0	2	2016-04-21	73	M	0	0	2016-04-21	2016-04-21	false	Premolars	3.43608	VitE	M	Premolar
599	36	2003-06-16	Group1	2003-06-16	2003-07-03	2	2006-05-15	5	retreatment	0		extracted	2009-10-07	0	0	0	2012-01-25	63	M	3	1	2009-10-07	2006-05-15	false	Molars	2.91314	VitE	M	Molar
599	14	2004-10-20	Group1	2004-10-20	2004-12-20	3	2007-03-21	1	0	root end surgery	WR	extracted	2007-10-10	1	0	0	2012-01-25	64	M	3	1	2007-10-10	2007-03-21	false	Premolars	2.41484	Trep1	M	Premolar
599	45	2005-08-22	Group1	2005-08-22	2005-09-13	1	#NULL!	#NULL!	0	0		0	#NULL!	2	0	0	2012-01-25	65	M	0	0	2012-01-25	2012-01-25	false	Premolars	6.42588	Trep1	M	Premolar
600	14	2005-09-30	Group1	2005-09-30	2005-11-15	2	#NULL!	#NULL!	0	0		extracted	2006-01-25	0	0	0	2016-04-28	65	W	3	1	2006-01-25	2006-01-25	false	Premolars	0.320336	Trep1	W	Premolar
600	15	2007-11-16	Group1	2007-11-16	2007-12-10	1	#NULL!	#NULL!	0	0		extracted	2012-05-23	1	0	1	2016-04-28	67	W	3	1	2012-05-23	2012-05-23	false	Premolars	4.51755	Trep1	W	Premolar
601	23	2000-06-20	Group1	2000-06-20	2000-08-02	3	#NULL!	#NULL!	0	0		0	#NULL!	0	0	0	2003-02-03	50	W	0	0	2003-02-03	2003-02-03	false	Anterior	2.62292	VitE	W	Anterior
601	12	2001-06-11	Group1	2001-06-11	2001-06-26	2	#NULL!	#NULL!	0	0		0	#NULL!	1	0	0	2003-02-03	51	W	0	0	2003-02-03	2003-02-03	false	Anterior	1.64822	VitE	W	Anterior
601	11	2001-06-11	Group1	2001-06-11	2001-06-26	2	#NULL!	#NULL!	0	0		0	#NULL!	1	0	0	2003-02-03	51	W	0	0	2003-02-03	2003-02-03	false	Anterior	1.64822	VitE	W	Anterior
601	21	2001-07-23	Group1	2001-07-23	2001-08-01	1	#NULL!	#NULL!	0	0		0	#NULL!	3	0	0	2003-02-03	52	W	0	0	2003-02-03	2003-02-03	false	Anterior	1.53323	VitE	W	Anterior
602	36	2010-07-01	Group1	2010-07-01	2010-07-01	0	#NULL!	#NULL!	0	0		0	#NULL!	0	0	2	2012-07-12	61	W	0	0	2012-07-12	2012-07-12	true	Molars	2.03153	Trep1	W	Molar
603	33	2005-02-22	Group1	2005-02-22	2005-04-21	3	2012-08-29	3	retreatment	0		0	#NULL!	0	0	9	2016-07-18	62	M	1	1	2016-07-18	2012-08-29	false	Anterior	7.51557	Trep1	M	Anterior
603	34	2005-02-23	Group1	2005-02-23	2005-04-21	2	2012-08-29	3	retreatment	0		0	#NULL!	1	0	9	2016-07-18	62	M	1	1	2016-07-18	2012-08-29	false	Premolars	7.51283	Trep1	M	Premolar
603	45	2007-11-23	Group1	2007-11-23	2007-12-20	2	#NULL!	#NULL!	0	0		extracted	2009-09-09	2	0	0	2016-07-18	65	M	3	1	2009-09-09	2009-09-09	false	Premolars	1.79607	VitE	M	Premolar
603	23	2011-07-28	Group 2	2011-07-28	2011-07-28	0	#NULL!	#NULL!	0	0		0	#NULL!	3	0	9	2016-07-18	69	M	0	0	2016-07-18	2016-07-18	true	Anterior	4.97478	VitE	M	Anterior
603	12	2011-12-12	Group 3	2011-12-12	2011-12-21	1	#NULL!	#NULL!	0	0		0	#NULL!	4	0	9	2016-07-18	69	M	0	0	2016-07-18	2016-07-18	false	Anterior	4.59969	VitE	M	Anterior
604	46	2004-07-22	Group1	2004-07-22	2004-07-22	0	#NULL!	#NULL!	0	0		0	#NULL!	0	0	0	2008-01-23	70	M	0	0	2008-01-23	2008-01-23	true	Molars	3.50453	VitE	M	Molar
605	27	2010-08-03	Group 2	2010-08-03	2010-09-23	2	#NULL!	#NULL!	0	0		0	#NULL!	0	0	0	2010-10-07	55	M	0	0	2010-10-07	2010-10-07	false	Molars	0.177964	Trep1	M	Molar
606	11	2001-09-13	Group1	2001-09-13	2002-02-21	8	#NULL!	#NULL!	0	0		0	#NULL!	0	0	0	2016-06-15	61	W	0	0	2016-06-15	2016-06-15	false	Anterior	14.7546	Trep1	W	Anterior
606	33	2009-12-21	Group 2	2009-12-21	2010-01-13	1	#NULL!	#NULL!	0	0		extracted	2012-03-13	2	0	0	2016-06-15	69	W	3	1	2012-03-13	2012-03-13	false	Anterior	2.22592	VitE	W	Anterior
606	43	2010-05-11	Group 2	2010-05-11	2010-06-16	1	#NULL!	#NULL!	0	0		extracted	2015-12-02	3	0	0	2016-06-15	70	W	3	1	2015-12-02	2015-12-02	false	Anterior	5.5607	VitE	W	Anterior
606	44	2012-02-13	Group 3	2012-02-13	2012-03-19	2	#NULL!	#NULL!	0	0		extracted	2014-01-22	4	0	0	2016-06-15	71	W	3	1	2014-01-22	2014-01-22	false	Premolars	1.94118	Trep1	W	Premolar
607	34	2011-08-22	Group 2	2011-08-22	2011-10-10	1	#NULL!	#NULL!	0	0		0	#NULL!	0	0	0	2016-05-02	88	W	0	0	2016-05-02	2016-05-02	false	Premolars	4.69552	Trep1	W	Premolar
607	35	2014-01-08	Group 3	2014-01-08	2014-01-20	1	#NULL!	#NULL!	0	0		0	#NULL!	1	0	0	2016-05-02	90	W	0	0	2016-05-02	2016-05-02	false	Premolars	2.31353	Trep1	W	Premolar
608	46	2016-02-18	Group 3	2016-02-18	2016-05-12	4	#NULL!	#NULL!	0	0		0	#NULL!	0	0	0	2016-05-12	68	W	0	0	2016-05-12	2016-05-12	false	Molars	0.229985	Trep1	W	Molar
609	11	2000-06-16	Group1	2000-06-16	2000-07-12	2	#NULL!	#NULL!	0	0		0	#NULL!	0	0	0	2004-03-02	78	M	0	0	2004-03-02	2004-03-02	false	Anterior	3.70987	Trep1	M	Anterior
610	21	2001-09-10	Group1	2001-09-10	2001-09-19	1	#NULL!	#NULL!	0	0		extracted	2009-01-13	0	0	0	2015-12-03	60	M	3	1	2009-01-13	2009-01-13	false	Anterior	7.34308	Trep1	M	Anterior
611	35	2000-09-27	Group1	2000-09-27	2000-10-18	1	#NULL!	#NULL!	0	0		0	#NULL!	0	0	0	2011-07-29	66	W	0	0	2011-07-29	2011-07-29	false	Premolars	10.8339	Trep1	W	Premolar
612	33	2000-11-27	Group1	2000-11-27	2000-12-06	1	#NULL!	#NULL!	0	0		extracted	2006-10-16	0	0	0	2016-07-05	61	W	3	1	2006-10-16	2006-10-16	false	Anterior	5.88377	Trep1	W	Anterior
613	46	1999-09-27	Group1	1999-09-27	2000-03-15	1	2001-07-10	1	0	root end surgery	WR	extracted	2002-07-10	0	0	0	2016-07-12	52	M	3	1	2002-07-10	2001-07-10	false	Molars	1.78512	VitE	M	Molar
613	36	2001-10-08	Group1	2001-10-08	2001-10-08	0	#NULL!	#NULL!	0	0		extracted	2002-12-02	1	1	0	2016-07-12	54	M	3	1	2002-12-02	2002-12-02	true	Molars	1.14992	Trep1	M	Molar
613	45	2015-06-23	Group 3	2015-06-23	2015-06-23	0	#NULL!	#NULL!	0	0		0	#NULL!	2	1	3	2016-07-12	67	M	0	0	2016-07-12	2016-07-12	true	Premolars	1.0541	VitE	M	Premolar
613	22	2015-09-08	Group 3	2015-09-08	2015-10-15	1	#NULL!	#NULL!	0	0		0	#NULL!	3	1	2	2016-07-12	68	M	0	0	2016-07-12	2016-07-12	false	Anterior	0.843277	Trep1	M	Anterior
614	34	2001-04-27	Group1	2001-04-27	2002-03-04	6	2007-01-15	1	0	root end surgery	WR	extracted	2007-10-22	0	0	0	2016-05-17	57	W	3	1	2007-10-22	2007-01-15	false	Premolars	5.7195	Trep1	W	Premolar
614	33	2001-08-20	Group1	2001-08-20	2001-10-22	2	2009-12-03	5	retreatment	0		extracted	2015-12-08	1	0	0	2016-05-17	58	W	3	1	2015-12-08	2009-12-03	false	Anterior	8.28766	VitE	W	Anterior
614	13	2013-08-12	Group 3	2013-08-12	2013-09-30	1	#NULL!	#NULL!	0	0		0	#NULL!	4	0	0	2016-05-17	70	W	0	0	2016-05-17	2016-05-17	false	Anterior	2.76255	Trep1	W	Anterior
615	23	2000-03-15	Group1	2000-03-15	2000-03-15	0	#NULL!	#NULL!	0	0		0	#NULL!	0	0	7	2016-04-19	65	M	0	0	2016-04-19	2016-04-19	true	Anterior	16.0962	VitE	M	Anterior
616	26	2003-07-25	Group1	2003-07-25	2003-10-09	7	#NULL!	#NULL!	0	0		0	#NULL!	0	0	6	2016-02-22	66	W	0	0	2016-02-22	2016-02-22	false	Molars	12.5807	VitE	W	Molar
617	25	1999-11-10	Group1	1999-11-10	2000-06-15	3	#NULL!	#NULL!	0	0		extracted	2005-08-29	0	0	0	2007-02-21	69	M	3	1	2005-08-29	2005-08-29	false	Premolars	5.80163	Trep1	M	Premolar
617	15	2005-09-05	Group1	2005-09-05	2005-09-23	1	#NULL!	#NULL!	0	0		0	#NULL!	2	0	0	2007-02-21	75	M	0	0	2007-02-21	2007-02-21	false	Premolars	1.46204	Trep1	M	Premolar
617	44	2005-11-14	Group1	2005-11-14	2005-12-06	1	#NULL!	#NULL!	0	0		0	#NULL!	3	0	0	2007-02-21	75	M	0	0	2007-02-21	2007-02-21	false	Premolars	1.27039	Trep1	M	Premolar
617	45	2006-05-15	Group1	2006-05-15	2006-06-01	1	#NULL!	#NULL!	0	0		0	#NULL!	4	0	0	2007-02-21	76	M	0	0	2007-02-21	2007-02-21	false	Premolars	0.772091	Trep1	M	Premolar
618	34	2002-07-08	Group1	2002-07-08	2002-10-15	11	#NULL!	#NULL!	0	0		extracted	2008-03-17	0	0	0	2011-05-10	62	W	3	1	2008-03-17	2008-03-17	false	Premolars	5.69212	Trep1	W	Premolar
618	45	2003-02-04	Group1	2003-02-04	2003-02-04	0	#NULL!	#NULL!	0	0		extracted	2004-01-26	1	0	0	2011-05-10	62	W	3	1	2004-01-26	2004-01-26	true	Premolars	0.974696	VitE	W	Premolar
618	44	2004-01-28	Group1	2004-01-28	2004-03-08	2	#NULL!	#NULL!	0	0		0	#NULL!	2	0	0	2011-05-10	63	W	0	0	2011-05-10	2011-05-10	false	Premolars	7.2801	Trep1	W	Premolar
618	16	2006-05-09	Group1	2006-05-09	2006-06-28	3	#NULL!	#NULL!	0	0		0	#NULL!	3	0	0	2011-05-10	65	W	0	0	2011-05-10	2011-05-10	false	Molars	5.00216	VitE	W	Molar
618	33	2007-10-09	Group1	2007-10-09	2007-10-23	2	#NULL!	#NULL!	0	0		extracted	2009-07-14	4	0	0	2011-05-10	67	W	3	1	2009-07-14	2009-07-14	false	Anterior	1.76321	Trep1	W	Anterior
619	25	2007-03-21	Group1	2007-03-21	2007-04-04	1	#NULL!	#NULL!	0	0		extracted	2015-05-12	0	0	0	2016-06-29	64	M	3	1	2015-05-12	2015-05-12	false	Premolars	8.14255	Trep1	M	Premolar
620	45	2001-10-04	Group1	2001-10-04	2001-10-30	2	#NULL!	#NULL!	0	0		extracted	2007-09-10	0	0	0	2009-11-02	65	M	3	1	2007-09-10	2007-09-10	false	Premolars	5.93305	Trep1	M	Premolar
620	21	2002-04-03	Group1	2002-04-03	2002-05-06	3	#NULL!	#NULL!	0	0		extracted	2004-11-15	1	0	0	2009-11-02	66	M	3	1	2004-11-15	2004-11-15	false	Anterior	2.62018	Trep1	M	Anterior
621	13	2004-08-31	Group1	2004-08-31	2004-08-31	0	#NULL!	#NULL!	0	0		extracted	2009-08-11	0	0	0	2013-08-08	80	W	3	1	2009-08-11	2009-08-11	true	Anterior	4.94467	Trep1	W	Anterior
621	12	2010-05-20	Group1	2010-05-20	2010-05-20	0	#NULL!	#NULL!	0	0		extracted	2011-02-08	1	0	0	2013-08-08	86	W	3	1	2011-02-08	2011-02-08	true	Anterior	0.722808	Trep1	W	Anterior
621	11	2012-07-26	Group 3	2012-07-26	2012-07-26	0	#NULL!	#NULL!	0	0		0	#NULL!	2	0	0	2013-08-08	88	W	0	0	2013-08-08	2013-08-08	true	Anterior	1.03493	VitE	W	Anterior
622	34	2011-09-28	Group 2	2011-09-28	2011-10-12	1	#NULL!	#NULL!	0	0		0	#NULL!	0	0	0	2014-04-28	84	W	0	0	2014-04-28	2014-04-28	false	Premolars	2.58185	Trep1	W	Premolar
623	36	2005-08-09	Group1	2005-08-09	2005-09-07	2	#NULL!	#NULL!	0	0		0	#NULL!	0	0	0	2008-04-01	26	W	0	0	2008-04-01	2008-04-01	false	Molars	2.64482	VitE	W	Molar
624	47	2002-09-17	Group1	2002-09-17	2002-10-10	3	#NULL!	#NULL!	0	0		extracted	2008-02-21	0	0	0	2016-03-01	58	W	3	1	2008-02-21	2008-02-21	false	Molars	5.42928	Trep1	W	Molar
624	14	2012-06-13	Group 3	2012-06-13	2012-07-12	1	#NULL!	#NULL!	0	0		0	#NULL!	1	0	0	2016-03-01	68	W	0	0	2016-03-01	2016-03-01	false	Premolars	3.71534	VitE	W	Premolar
624	33	2012-06-26	Group 3	2012-06-26	2012-07-02	1	#NULL!	#NULL!	0	0		0	#NULL!	2	0	0	2016-03-01	68	W	0	0	2016-03-01	2016-03-01	false	Anterior	3.67975	Trep1	W	Anterior
624	36	2013-01-15	Group 3	2013-01-15	2013-01-15	0	#NULL!	#NULL!	0	0		0	#NULL!	3	0	0	2016-03-01	69	W	0	0	2016-03-01	2016-03-01	true	Molars	3.12396	Trep1	W	Molar
625	43	2006-08-02	Group1	2006-08-02	2006-08-31	3	#NULL!	#NULL!	0	0		extracted	2008-02-13	0	0	0	2014-05-15	56	W	3	1	2008-02-13	2008-02-13	false	Anterior	1.53323	Trep1	W	Anterior
625	33	2008-08-14	Group 2	2008-08-14	2008-09-23	2	#NULL!	#NULL!	0	0		0	#NULL!	1	0	0	2014-05-15	58	W	0	0	2014-05-15	2014-05-15	false	Anterior	5.74961	VitE	W	Anterior
626	17	2002-07-15	Group1	2002-07-15	2002-07-29	1	#NULL!	#NULL!	0	0		0	#NULL!	0	0	4	2016-02-01	37	M	0	0	2016-02-01	2016-02-01	false	Molars	13.5499	VitE	M	Molar
626	16	2002-07-15	Group1	2002-07-15	2002-07-29	1	#NULL!	#NULL!	0	0		0	#NULL!	0	0	4	2016-02-01	37	M	0	0	2016-02-01	2016-02-01	false	Molars	13.5499	VitE	M	Molar
627	36	2004-04-15	Group1	2004-04-15	2004-11-11	4	#NULL!	#NULL!	0	0		0	#NULL!	0	0	0	2005-08-16	50	W	0	0	2005-08-16	2005-08-16	false	Molars	1.3361	VitE	W	Molar
628	15	2012-12-05	Group 3	2012-12-05	2013-01-07	1	#NULL!	#NULL!	0	0		0	#NULL!	0	0	7	2016-08-19	69	W	0	0	2016-08-19	2016-08-19	false	Premolars	3.70439	VitE	W	Premolar
629	24	2010-09-10	Group 2	2010-09-10	2010-09-16	1	#NULL!	#NULL!	0	0		0	#NULL!	0	0	0	2010-09-21	43	M	0	0	2010-09-21	2010-09-21	false	Premolars	0.030117	VitE	M	Premolar
630	32	2000-11-13	Group1	2000-11-13	2000-11-13	0	#NULL!	#NULL!	0	0		0	#NULL!	0	0	0	2005-06-29	74	M	0	0	2005-06-29	2005-06-29	true	Anterior	4.62433	VitE	M	Anterior
630	36	2000-11-29	Group1	2000-11-29	2000-12-18	1	#NULL!	#NULL!	0	0		extracted	2005-06-29	1	0	0	2005-06-29	74	M	3	1	2005-06-29	2005-06-29	false	Molars	4.58052	Trep1	M	Molar
631	24	2002-12-09	Group1	2002-12-09	2003-02-04	3	#NULL!	#NULL!	0	0		0	#NULL!	0	0	0	2003-02-04	63	M	0	0	2003-02-04	2003-02-04	false	Premolars	0.156061	Trep1	M	Premolar
632	44	2000-07-06	Group1	2000-07-06	2000-10-17	3	#NULL!	#NULL!	0	0		extracted	2006-03-08	0	0	0	2016-07-06	72	W	3	1	2006-03-08	2006-03-08	false	Premolars	5.67021	Trep1	W	Premolar
632	23	2003-05-22	Group1	2003-05-22	2003-06-24	4	#NULL!	#NULL!	0	0		extracted	2011-06-08	2	0	0	2016-07-06	75	W	3	1	2011-06-08	2011-06-08	false	Anterior	8.04672	Trep1	W	Anterior
632	22	2008-11-12	Group1	2008-11-12	2008-12-10	1	#NULL!	#NULL!	0	0		extracted	2014-04-09	4	0	0	2016-07-06	81	W	3	1	2014-04-09	2014-04-09	false	Anterior	5.40464	Trep1	W	Anterior
633	21	2009-05-12	Group1	2009-05-12	2009-05-12	0	#NULL!	#NULL!	0	0		extracted	2011-07-07	1	0	0	2016-07-11	79	W	3	1	2011-07-07	2011-07-07	true	Anterior	2.152	Trep1	W	Anterior
633	11	2009-11-10	Group1	2009-11-10	2009-12-15	1	#NULL!	#NULL!	0	0		extracted	2011-07-07	2	0	0	2016-07-11	80	W	3	1	2011-07-07	2011-07-07	false	Anterior	1.6537	Trep1	W	Anterior
634	21	2005-04-22	Group1	2005-04-22	2005-05-25	3	#NULL!	#NULL!	0	0		extracted	2010-05-27	1	0	2	2016-08-16	86	W	3	1	2010-05-27	2010-05-27	false	Anterior	5.09525	Trep1	W	Anterior
635	13	2002-07-18	Group1	2002-07-18	2002-08-13	2	#NULL!	#NULL!	0	0		extracted	2012-06-19	1	0	0	2016-09-01	39	M	3	1	2012-06-19	2012-06-19	false	Anterior	9.92219	VitE	M	Anterior
636	44	1999-09-13	Group1	1999-09-13	1999-09-27	1	#NULL!	#NULL!	0	0		extracted	2006-11-28	0	0	0	2010-06-04	71	M	3	1	2006-11-28	2006-11-28	false	Premolars	7.20892	VitE	M	Premolar
637	47	2010-09-20	Group 2	2010-09-20	2010-10-12	2	#NULL!	#NULL!	0	0		0	#NULL!	0	0	0	2010-10-12	51	M	0	0	2010-10-12	2010-10-12	false	Molars	0.060234	VitE	M	Molar
638	15	2006-09-28	Group1	2006-09-28	2008-01-22	2	#NULL!	#NULL!	0	0		0	#NULL!	0	0	0	2008-07-22	24	W	0	0	2008-07-22	2008-07-22	false	Premolars	1.81523	VitE	W	Premolar
639	47	2007-02-14	Group1	2007-02-14	2007-07-19	3	2008-02-21	1	0	root end surgery	WR	0	#NULL!	0	0	0	2010-11-12	35	W	2	1	2010-11-12	2008-02-21	false	Molars	1.0185	VitE	W	Molar
639	27	2008-12-11	Group1	2008-12-11	2008-12-18	2	#NULL!	#NULL!	0	0		0	#NULL!	2	1	0	2010-11-12	37	W	0	0	2010-11-12	2010-11-12	false	Molars	1.91928	VitE	W	Molar
640	21	2012-06-06	Group 3	2012-06-06	2012-09-04	1	#NULL!	#NULL!	0	0		0	#NULL!	0	0	7	2016-03-24	81	W	0	0	2016-03-24	2016-03-24	false	Anterior	3.79748	Trep1	W	Anterior
641	43	2009-08-18	Group 2	2009-08-18	2009-12-14	1	#NULL!	#NULL!	0	0		0	#NULL!	0	0	0	2010-09-16	58	M	0	0	2010-09-16	2010-09-16	false	Anterior	1.07874	Trep1	M	Anterior
642	47	2008-06-30	Group1	2008-07-15	2008-09-09	4	#NULL!	#NULL!	0	0		0	#NULL!	0	0	1	2016-07-27	26	W	0	0	2016-07-27	2016-07-27	false	Molars	8.0741	VitE	W	Molar
643	46	2004-06-24	Group1	2012-04-23	2004-07-05	1	2012-04-23	4	0	root end surgery	WR	extracted	2013-10-02	0	0	10	2016-02-11	38	M	3	1	2013-10-02	2012-04-23	false	Molars	7.83042	Trep1	M	Molar
643	15	2004-10-28	Group1	2004-10-28	2004-12-13	2	2010-11-30	5	retreatment	0		extracted	2010-12-10	1	0	10	2016-02-11	39	M	3	1	2010-12-10	2010-11-30	false	Premolars	6.08911	Trep1	M	Premolar
643	26	2010-09-23	Group 2	2010-09-23	2010-11-02	1	#NULL!	#NULL!	0	0		0	#NULL!	3	0	5	2016-02-11	45	M	0	0	2016-02-11	2016-02-11	false	Molars	5.38547	VitE	M	Molar
644	35	2005-06-20	Group1	2005-06-20	2005-06-27	1	#NULL!	#NULL!	0	0		0	#NULL!	0	0	2	2015-11-16	42	M	0	0	2015-11-16	2015-11-16	false	Premolars	10.4068	VitE	M	Premolar
645	23	1999-09-29	Group1	1999-09-29	1999-10-07	1	#NULL!	#NULL!	0	0		extracted	2007-07-31	0	0	0	2008-07-16	59	W	3	1	2007-07-31	2007-07-31	false	Anterior	7.8359	Trep1	W	Anterior
645	12	2002-01-31	Group1	2002-01-31	2002-01-31	0	#NULL!	#NULL!	0	0		extracted	2005-03-03	2	0	0	2008-07-16	61	W	3	1	2005-03-03	2005-03-03	true	Anterior	3.08563	Trep1	W	Anterior
645	45	2002-04-03	Group1	2002-04-03	2002-05-07	3	#NULL!	#NULL!	0	0		0	#NULL!	3	0	0	2008-07-16	61	W	0	0	2008-07-16	2008-07-16	false	Premolars	6.28624	Trep1	W	Premolar
645	37	2003-05-26	Group1	2003-05-26	2003-07-01	2	#NULL!	#NULL!	0	0		0	#NULL!	4	0	0	2008-07-16	62	W	0	0	2008-07-16	2008-07-16	false	Molars	5.1418	Trep1	W	Molar
645	35	2004-03-22	Group1	2004-03-22	2004-04-05	2	#NULL!	#NULL!	0	0		0	#NULL!	5	0	0	2008-07-16	63	W	0	0	2008-07-16	2008-07-16	false	Premolars	4.31769	Trep1	W	Premolar
645	42	2004-08-23	Group1	2004-08-23	2004-09-22	3	#NULL!	#NULL!	0	0		0	#NULL!	6	0	0	2008-07-16	64	W	0	0	2008-07-16	2008-07-16	false	Anterior	3.89605	Trep1	W	Anterior
646	27	2011-05-26	Group 2	2011-05-26	2011-08-30	2	#NULL!	#NULL!	0	0		0	#NULL!	0	0	0	2015-11-03	50	M	0	0	2015-11-03	2015-11-03	false	Molars	4.44089	VitE	M	Molar
647	16	2003-06-12	Group1	2003-06-13	2003-07-03	2	#NULL!	#NULL!	0	0		0	#NULL!	0	0	0	2004-12-09	62	M	0	0	2004-12-09	2004-12-09	false	Molars	1.4949	Trep1	M	Molar
647	26	2004-10-05	Group1	2004-10-05	2004-11-09	3	#NULL!	#NULL!	0	0		0	#NULL!	1	0	0	2004-12-09	63	M	0	0	2004-12-09	2004-12-09	false	Molars	0.177964	VitE	M	Molar
648	33	2003-10-17	Group1	2003-10-17	2004-08-11	5	#NULL!	#NULL!	0	0		extracted	2008-11-05	0	0	0	2008-12-10	63	M	3	1	2008-11-05	2008-11-05	false	Anterior	5.05418	Trep1	M	Anterior
648	13	2003-11-25	Group1	2003-11-25	2004-01-13	3	#NULL!	#NULL!	0	0		extracted	2008-11-05	1	0	0	2008-12-10	63	M	3	1	2008-11-05	2008-11-05	false	Anterior	4.9474	Trep1	M	Anterior
648	23	2003-12-09	Group1	2003-12-09	2004-01-13	1	#NULL!	#NULL!	0	0		0	#NULL!	2	0	0	2008-12-10	63	M	0	0	2008-12-10	2008-12-10	false	Anterior	5.0049	Trep1	M	Anterior
648	43	2007-03-07	Group1	2007-03-07	2007-03-07	0	#NULL!	#NULL!	0	0		extracted	2007-05-16	3	0	0	2008-12-10	66	M	3	1	2007-05-16	2007-05-16	true	Anterior	0.191654	Trep1	M	Anterior
649	22	2007-09-24	Group1	2007-09-24	2007-10-11	2	#NULL!	#NULL!	0	0		0	#NULL!	4	0	0	2012-08-31	37	M	0	0	2012-08-31	2012-08-31	false	Anterior	4.93645	Trep1	M	Anterior
650	45	2001-10-22	Group1	2001-10-22	2001-11-28	1	#NULL!	#NULL!	0	0		0	#NULL!	0	0	0	2010-05-18	71	W	0	0	2010-05-18	2010-05-18	false	Premolars	8.56966	Trep1	W	Premolar
650	31	2002-01-07	Group1	2002-01-07	2002-01-30	2	#NULL!	#NULL!	0	0		extracted	2008-11-18	1	0	0	2010-05-18	71	W	3	1	2008-11-18	2008-11-18	false	Anterior	6.86394	Trep1	W	Anterior
650	41	2002-03-26	Group1	2002-03-26	2002-04-08	2	#NULL!	#NULL!	0	0		extracted	2008-11-18	3	0	0	2010-05-18	71	W	3	1	2008-11-18	2008-11-18	false	Anterior	6.65039	Trep1	W	Anterior
651	46	2013-10-15	Group 3	2013-10-15	2013-10-24	1	#NULL!	#NULL!	0	0		0	#NULL!	0	0	5	2016-07-18	62	W	0	0	2016-07-18	2016-07-18	false	Molars	2.75708	VitE	W	Molar
652	44	2013-04-30	Group 3	2013-04-30	2013-06-06	1	#NULL!	#NULL!	0	0		0	#NULL!	1	0	6	2016-09-15	75	W	0	0	2016-09-15	2016-09-15	false	Premolars	3.37858	Trep1	W	Premolar
652	13	2014-02-19	Group 3	2014-02-19	2014-05-12	1	#NULL!	#NULL!	0	0		0	#NULL!	2	0	5	2016-09-15	75	W	0	0	2016-09-15	2016-09-15	false	Anterior	2.5709	Trep1	W	Anterior
653	31	2006-12-06	Group1	2006-12-06	2006-12-20	1	#NULL!	#NULL!	0	0		0	#NULL!	0	0	1	2012-03-15	23	M	0	0	2012-03-15	2012-03-15	false	Anterior	5.27322	Trep1	M	Anterior
653	14	2011-09-28	Group 2	2011-09-28	2011-11-07	1	#NULL!	#NULL!	0	0		0	#NULL!	1	0	1	2012-03-15	28	M	0	0	2012-03-15	2012-03-15	false	Premolars	0.462707	VitE	M	Premolar
654	13	2004-08-18	Group1	2004-08-18	2004-09-30	4	#NULL!	#NULL!	0	0		0	#NULL!	0	0	0	2007-04-30	51	W	0	0	2007-04-30	2007-04-30	false	Anterior	2.69684	Trep1	W	Anterior
655	45	2005-12-14	Group1	2005-12-14	2006-01-18	1	2006-01-31	1	0	root end surgery	WR	0	#NULL!	0	0	0	2006-11-21	63	W	2	1	2006-11-21	2006-01-31	false	Premolars	0.13142	Trep1	W	Premolar
656	34	1999-12-14	Group1	1999-12-14	1999-12-14	0	1999-12-21	2	retreatment	0		extracted	2010-04-13	0	0	0	2016-07-20	34	M	3	1	2010-04-13	1999-12-21	true	Premolars	0.0191654	VitE	M	Premolar
656	12	2016-06-23	Group 3	2016-06-23	2016-07-20	2	#NULL!	#NULL!	0	0		0	#NULL!	2	0	0	2016-07-20	51	M	0	0	2016-07-20	2016-07-20	false	Anterior	0.0739236	Trep1	M	Anterior
657	24	2010-04-20	Group 2	2010-04-20	2010-05-11	1	#NULL!	#NULL!	0	0		extracted	2016-01-11	0	0	12	2016-09-19	64	M	3	1	2016-01-11	2016-01-11	false	Premolars	5.72771	Trep1	M	Premolar
657	36	2014-02-26	Group 3	2014-02-26	2014-02-26	0	#NULL!	#NULL!	0	0		0	#NULL!	1	0	8	2016-09-19	68	M	0	0	2016-09-19	2016-09-19	true	Molars	2.56268	VitE	M	Molar
657	23	2015-01-19	Group 3	2015-02-09	2015-02-09	0	#NULL!	#NULL!	0	0		0	#NULL!	2	0	4	2016-09-19	69	M	0	0	2016-09-19	2016-09-19	true	Anterior	1.66739	VitE	M	Anterior
658	27	2005-03-08	Group1	2005-03-08	2005-03-08	0	2016-01-27	3	0	root end surgery	WR	0	#NULL!	0	0	7	2016-09-22	56	W	2	1	2016-09-22	2016-01-27	true	Molars	10.8887	VitE	W	Molar
659	16	2001-10-15	Group1	2001-10-15	2001-10-15	0	#NULL!	#NULL!	0	0		0	#NULL!	0	0	0	2011-02-28	50	W	0	0	2011-02-28	2011-02-28	true	Molars	9.37187	VitE	W	Molar
660	26	2005-09-29	Group1	2005-09-29	2005-10-20	1	2011-05-05	6	retreatment	0		extracted	2013-07-29	1	0	2	2016-04-14	70	W	3	1	2013-07-29	2011-05-05	false	Molars	5.59629	Trep1	W	Molar
660	25	2012-10-09	Group 3	2012-10-09	2012-10-18	1	#NULL!	#NULL!	0	0		extracted	2016-01-28	5	0	5	2016-04-14	77	W	3	1	2016-01-28	2016-01-28	false	Premolars	3.30192	VitE	W	Premolar
661	41	1999-08-20	Group1	1999-08-20	1999-08-26	1	#NULL!	#NULL!	0	0		0	#NULL!	0	0	0	2004-07-01	66	W	0	0	2004-07-01	2004-07-01	false	Anterior	4.86527	VitE	W	Anterior
662	47	2002-03-05	Group1	2002-03-05	2002-03-19	3	#NULL!	#NULL!	0	0		extracted	2011-06-29	0	0	0	2016-09-21	60	W	3	1	2011-06-29	2011-06-29	false	Molars	9.31711	VitE	W	Molar
663	36	2008-01-24	Group 2	2008-01-24	2008-05-08	1	#NULL!	#NULL!	0	0		0	#NULL!	0	0	0	2010-05-26	43	M	0	0	2010-05-26	2010-05-26	false	Molars	2.33544	VitE	M	Molar
664	45	2005-05-02	Group1	2005-05-02	2005-06-21	2	#NULL!	#NULL!	0	0		extracted	2010-09-07	0	0	0	2012-03-15	65	M	3	1	2010-09-07	2010-09-07	false	Premolars	5.34988	Trep1	M	Premolar
664	13	2008-03-20	Group1	2008-03-20	2008-04-14	1	#NULL!	#NULL!	0	0		extracted	2010-02-08	1	0	0	2012-03-15	68	M	3	1	2010-02-08	2010-02-08	false	Anterior	1.88916	VitE	M	Anterior
664	42	2008-11-04	Group1	2008-11-04	2009-01-26	2	#NULL!	#NULL!	0	0		extracted	2010-09-07	2	0	0	2012-03-15	69	M	3	1	2010-09-07	2010-09-07	false	Anterior	1.83988	Trep1	M	Anterior
664	46	2010-10-12	Group 2	2010-10-12	2010-11-24	1	#NULL!	#NULL!	0	0		0	#NULL!	4	0	0	2012-03-15	71	M	0	0	2012-03-15	2012-03-15	false	Molars	1.42371	Trep1	M	Molar
665	13	2008-12-08	Group1	2008-12-08	2009-01-29	3	#NULL!	#NULL!	0	0		extracted	2011-05-20	0	0	0	2011-05-23	75	W	3	1	2011-05-20	2011-05-20	false	Anterior	2.44495	VitE	W	Anterior
666	13	2005-05-10	Group1	2005-05-10	2007-03-20	4	#NULL!	#NULL!	0	0		0	#NULL!	0	0	1	2016-09-15	58	W	0	0	2016-09-15	2016-09-15	false	Anterior	11.3514	Trep1	W	Anterior
666	25	2007-04-23	Group1	2007-04-23	2007-05-09	1	#NULL!	#NULL!	0	0		0	#NULL!	2	0	1	2016-09-15	60	W	0	0	2016-09-15	2016-09-15	false	Premolars	9.39925	Trep1	W	Premolar
666	23	2013-03-26	Group 3	2013-03-26	2013-04-09	2	#NULL!	#NULL!	0	0		0	#NULL!	3	0	1	2016-09-15	66	W	0	0	2016-09-15	2016-09-15	false	Anterior	3.47441	Trep1	W	Anterior
666	16	2014-06-30	Group 3	2014-06-30	2014-11-26	2	#NULL!	#NULL!	0	0		0	#NULL!	5	0	0	2016-09-15	67	W	0	0	2016-09-15	2016-09-15	false	Molars	2.21223	Trep1	W	Molar
667	42	2006-05-08	Group1	2006-05-08	2006-06-19	2	#NULL!	#NULL!	0	0		0	#NULL!	0	0	0	2006-07-24	54	W	0	0	2006-07-24	2006-07-24	false	Anterior	0.210819	Trep1	W	Anterior
668	23	2005-05-19	Group1	2005-05-19	2005-06-09	1	2009-03-26	2	retreatment	0		0	#NULL!	0	0	5	2015-09-17	64	M	1	1	2015-09-17	2009-03-26	false	Anterior	3.85224	VitE	M	Anterior
668	13	2005-10-17	Group1	2005-10-17	2005-10-17	0	#NULL!	#NULL!	0	0		0	#NULL!	1	0	5	2015-09-17	64	M	0	0	2015-09-17	2015-09-17	true	Anterior	9.91671	VitE	M	Anterior
668	43	2008-07-28	Group1	2008-07-28	2008-08-07	1	#NULL!	#NULL!	0	0		0	#NULL!	2	0	5	2015-09-17	67	M	0	0	2015-09-17	2015-09-17	false	Anterior	7.13773	VitE	M	Anterior
669	21	2007-07-03	Group1	2007-07-03	2007-07-12	1	#NULL!	#NULL!	0	0		extracted	2009-07-23	0	0	9	2016-07-13	69	W	3	1	2009-07-23	2009-07-23	false	Anterior	2.05617	Trep1	W	Anterior
670	24	1999-03-17	Group1	1999-03-17	1999-04-07	1	#NULL!	#NULL!	0	0		extracted	1999-07-28	0	0	8	2016-05-24	57	W	3	1	1999-07-28	1999-07-28	false	Premolars	0.364142	VitE	W	Premolar
670	25	1999-06-14	Group1	1999-06-14	1999-07-28	1	#NULL!	#NULL!	0	0		0	#NULL!	1	0	9	2016-05-24	57	W	0	0	2016-05-24	2016-05-24	false	Premolars	16.9449	Trep1	W	Premolar
670	16	1999-11-24	Group1	1999-11-24	1999-11-24	0	#NULL!	#NULL!	0	0		extracted	2010-02-03	2	0	9	2016-05-24	58	W	3	1	2010-02-03	2010-02-03	true	Molars	10.196	Trep1	W	Molar
670	14	1999-11-24	Group1	1999-11-24	1999-11-24	0	#NULL!	#NULL!	0	0		extracted	2010-02-03	2	0	9	2016-05-24	58	W	3	1	2010-02-03	2010-02-03	true	Premolars	10.196	VitE	W	Premolar
670	33	2002-04-24	Group1	2002-04-24	2002-04-24	0	#NULL!	#NULL!	0	0		0	#NULL!	4	0	9	2016-05-24	60	W	0	0	2016-05-24	2016-05-24	true	Anterior	14.0838	Trep1	W	Anterior
670	23	2012-10-23	Group 3	2012-10-23	2012-10-23	0	#NULL!	#NULL!	0	0		0	#NULL!	5	0	8	2016-05-24	71	W	0	0	2016-05-24	2016-05-24	true	Anterior	3.58393	Trep1	W	Anterior
671	14	2006-03-21	Group1	2006-03-21	2006-04-13	2	2010-01-12	2	retreatment	0		0	#NULL!	0	0	0	2016-08-19	67	M	1	1	2016-08-19	2010-01-12	false	Premolars	3.81391	Trep1	M	Premolar
671	13	2016-08-11	Group 3	2016-08-11	2016-08-19	1	#NULL!	#NULL!	0	0		0	#NULL!	2	0	0	2016-08-19	77	M	0	0	2016-08-19	2016-08-19	false	Anterior	0.0219033	VitE	M	Anterior
672	16	2003-07-10	Group1	2003-07-10	2003-09-02	2	#NULL!	#NULL!	0	0		extracted	2007-11-22	0	0	10	2016-09-07	72		3	1	2007-11-22	2007-11-22	false	Molars	4.36971	VitE	#NULL!	Molar
672	34	2004-02-19	Group1	2004-02-19	2004-02-19	0	2005-11-30	1	0	root end surgery	WR	0	#NULL!	1	0	10	2016-09-07	72		2	1	2016-09-07	2005-11-30	true	Premolars	1.77964	VitE	#NULL!	Premolar
672	13	2010-04-29	Group 2	2010-04-29	2010-04-29	0	#NULL!	#NULL!	0	0		0	#NULL!	2	0	10	2016-09-07	79		0	0	2016-09-07	2016-09-07	true	Anterior	6.36017	VitE	#NULL!	Anterior
673	34	1999-07-13	Group1	1999-07-13	1999-09-30	4	#NULL!	#NULL!	0	0		0	#NULL!	0	0	11	2016-04-26	74	W	0	0	2016-04-26	2016-04-26	false	Premolars	16.7889	Trep1	W	Premolar
673	33	1999-07-13	Group1	1999-07-13	1999-09-30	4	#NULL!	#NULL!	0	0		0	#NULL!	0	0	11	2016-04-26	74	W	0	0	2016-04-26	2016-04-26	false	Anterior	16.7889	Trep1	W	Anterior
673	25	2009-10-13	Group 2	2009-10-13	2009-11-18	2	#NULL!	#NULL!	0	0		extracted	2014-08-18	4	0	7	2016-04-26	85	W	3	1	2014-08-18	2014-08-18	false	Premolars	4.8461	VitE	W	Premolar
673	21	2012-01-31	Group 3	2012-01-31	2012-01-31	0	#NULL!	#NULL!	0	0		0	#NULL!	5	0	10	2016-04-26	87	W	0	0	2016-04-26	2016-04-26	true	Anterior	4.23555	Trep1	W	Anterior
674	22	1999-03-02	Group1	1999-03-02	1999-03-02	0	#NULL!	#NULL!	0	0		extracted	1999-07-14	0	0	0	2003-08-13	74	W	3	1	1999-07-14	1999-07-14	true	Anterior	0.36688	VitE	W	Anterior
674	41	2002-07-03	Group1	2002-07-03	2003-01-07	3	#NULL!	#NULL!	0	0		0	#NULL!	1	0	0	2003-08-13	78	W	0	0	2003-08-13	2003-08-13	false	Anterior	1.11159	Trep1	W	Anterior
675	16	2003-08-29	Group1	2003-08-29	2003-10-20	3	2005-04-19	1	0	root end surgery	WR	extracted	2016-09-26	0	0	1	2016-09-26	41	W	3	1	2016-09-26	2005-04-19	false	Molars	1.64001	VitE	W	Molar
676	35	2007-02-21	Group1	2007-02-21	2007-03-20	1	#NULL!	#NULL!	0	0		0	#NULL!	0	0	4	2016-06-27	46	M	0	0	2016-06-27	2016-06-27	false	Premolars	9.34723	Trep1	M	Premolar
676	37	2012-12-18	Group 3	2012-12-18	2013-01-22	1	#NULL!	#NULL!	0	0		0	#NULL!	1	0	3	2016-06-27	52	M	0	0	2016-06-27	2016-06-27	false	Molars	3.52369	Trep1	M	Molar
677	35	2004-02-16	Group1	2004-02-16	2004-04-01	3	#NULL!	#NULL!	0	0		0	#NULL!	0	0	0	2010-12-28	51	M	0	0	2010-12-28	2010-12-28	false	Premolars	6.86394	Trep1	M	Premolar
677	34	2005-03-22	Group1	2005-03-22	2005-04-20	1	#NULL!	#NULL!	0	0		0	#NULL!	1	0	0	2010-12-28	53	M	0	0	2010-12-28	2010-12-28	false	Premolars	5.76878	Trep1	M	Premolar
678	17	2003-11-27	Group1	2003-11-27	2003-12-01	1	#NULL!	#NULL!	0	0		0	#NULL!	0	0	1	2015-12-03	60	W	0	0	2015-12-03	2015-12-03	false	Molars	12.0167	VitE	W	Molar
678	37	2007-04-24	Group1	2007-04-24	2007-05-08	1	#NULL!	#NULL!	0	0		0	#NULL!	2	0	1	2015-12-03	64	W	0	0	2015-12-03	2015-12-03	false	Molars	8.61073	VitE	W	Molar
679	26	2012-10-09	Group 3	2012-11-22	2012-12-19	2	#NULL!	#NULL!	0	0		0	#NULL!	0	0	0	2016-03-21	26	M	0	0	2016-03-21	2016-03-21	false	Molars	3.44703	Trep1	M	Molar
680	13	2003-12-04	Group1	2003-12-04	2003-12-11	1	#NULL!	#NULL!	0	0		0	#NULL!	0	0	5	2016-09-05	62	M	0	0	2016-09-05	2016-09-05	false	Anterior	12.7559	VitE	M	Anterior
680	14	2006-07-04	Group1	2006-07-04	2006-07-11	1	#NULL!	#NULL!	0	0		extracted	2010-02-04	1	0	5	2016-09-05	64	M	3	1	2010-02-04	2010-02-04	false	Premolars	3.5894	Trep1	M	Premolar
680	47	2008-08-05	Group1	2008-08-05	2008-08-05	0	#NULL!	#NULL!	0	0		0	#NULL!	2	0	5	2016-09-05	66	M	0	0	2016-09-05	2016-09-05	true	Molars	8.08505	VitE	M	Molar
681	46	2006-03-27	Group1	2006-03-27	2006-09-07	3	2011-01-27	2	retreatment	0		extracted	2011-02-01	0	0	0	2011-03-01	25	M	3	1	2011-02-01	2011-01-27	false	Molars	4.83789	Trep1	M	Molar
681	14	2010-12-08	Group 2	2010-12-08	2011-01-19	3	#NULL!	#NULL!	0	0		0	#NULL!	2	0	0	2011-03-01	30	M	0	0	2011-03-01	2011-03-01	false	Premolars	0.227247	VitE	M	Premolar
682	23	2006-12-11	Group1	2006-12-11	2007-01-09	1	#NULL!	#NULL!	0	0		0	#NULL!	0	0	0	2007-05-21	51	M	0	0	2007-05-21	2007-05-21	false	Anterior	0.440804	VitE	M	Anterior
683	12	2003-01-13	Group1	2003-01-13	2003-03-12	3	#NULL!	#NULL!	0	0		0	#NULL!	0	0	0	2005-11-15	90	W	0	0	2005-11-15	2005-11-15	false	Anterior	2.83921	Trep1	W	Anterior
684	27	2002-06-24	Group1	2002-06-24	2002-08-12	2	#NULL!	#NULL!	0	0		extracted	2004-06-17	0	0	0	2014-10-01	44	M	3	1	2004-06-17	2004-06-17	false	Molars	1.98225	Trep1	M	Molar
684	34	2004-03-09	Group1	2004-03-09	2004-06-16	2	#NULL!	#NULL!	0	0		0	#NULL!	1	0	2	2014-10-01	46	M	0	0	2014-10-01	2014-10-01	false	Premolars	10.5629	VitE	M	Premolar
684	45	2013-07-15	Group 3	2013-07-15	2013-07-15	0	#NULL!	#NULL!	0	0		0	#NULL!	2	0	2	2014-10-01	55	M	0	0	2014-10-01	2014-10-01	true	Premolars	1.21289	Trep1	M	Premolar
684	37	2013-07-15	Group 3	2013-07-15	2013-07-22	1	#NULL!	#NULL!	0	0		0	#NULL!	2	0	2	2014-10-01	55	M	0	0	2014-10-01	2014-10-01	false	Molars	1.21289	VitE	M	Molar
685	23	2000-12-04	Group1	2000-12-04	2001-05-10	5	2001-05-11	2	retreatment	0		0	#NULL!	0	0	0	2004-03-30	78	W	1	1	2004-03-30	2001-05-11	false	Anterior	0.43259	Trep1	W	Anterior
686	37	2009-04-14	Group1	2009-04-14	2009-05-19	1	#NULL!	#NULL!	0	0		0	#NULL!	0	0	1	2013-01-22	58	M	0	0	2013-01-22	2013-01-22	false	Molars	3.77558	Trep1	M	Molar
687	18	2001-12-19	Group1	2001-12-19	2002-01-16	1	#NULL!	#NULL!	0	0		0	#NULL!	0	0	8	2016-06-14	56	W	0	0	2016-06-14	2016-06-14	false	Molars	14.4863	VitE	W	Molar
687	15	2002-05-08	Group1	2002-05-08	2002-05-08	0	#NULL!	#NULL!	0	0		extracted	2013-06-18	1	0	8	2016-06-14	56	W	3	1	2013-06-18	2013-06-18	true	Premolars	11.1132	Trep1	W	Premolar
687	35	2005-05-04	Group1	2005-05-04	2005-06-13	1	#NULL!	#NULL!	0	0		0	#NULL!	2	0	8	2016-06-14	59	W	0	0	2016-06-14	2016-06-14	false	Premolars	11.1132	Trep1	W	Premolar
688	12	2010-02-25	Group 2	2010-02-25	2010-03-02	1	#NULL!	#NULL!	0	0		0	#NULL!	0	0	0	2011-11-28	78	W	0	0	2011-11-28	2011-11-28	false	Anterior	1.755	Trep1	W	Anterior
689	46	2004-01-20	Group1	2004-01-20	2004-02-12	2	#NULL!	#NULL!	0	0		0	#NULL!	0	0	6	2016-07-21	50	M	0	0	2016-07-21	2016-07-21	false	Molars	12.5013	Trep1	M	Molar
689	47	2005-01-13	Group1	2005-01-13	2005-02-16	2	#NULL!	#NULL!	0	0		0	#NULL!	1	0	6	2016-07-21	51	M	0	0	2016-07-21	2016-07-21	false	Molars	11.5184	Trep1	M	Molar
690	45	2009-07-13	Group 2	2009-07-13	2009-08-06	3	#NULL!	#NULL!	0	0		0	#NULL!	0	0	1	2013-08-06	50	W	0	0	2013-08-06	2013-08-06	false	Premolars	4.0658	VitE	W	Premolar
691	43	2002-12-09	Group1	2002-12-09	2003-01-28	2	#NULL!	#NULL!	0	0		extracted	2014-06-05	0	0	1	2016-05-30	63	W	3	1	2014-06-05	2014-06-05	false	Anterior	11.4883	Trep1	W	Anterior
691	34	2006-04-18	Group1	2006-04-18	2006-04-26	1	#NULL!	#NULL!	0	0		extracted	2007-01-11	1	0	0	2016-05-30	66	W	3	1	2007-01-11	2007-01-11	false	Premolars	0.73376	Trep1	W	Premolar
692	15	2007-01-30	Group1	2007-01-30	2007-04-10	7	#NULL!	#NULL!	0	0		0	#NULL!	0	0	2	2016-09-21	51	W	0	0	2016-09-21	2016-09-21	false	Premolars	9.64292	VitE	W	Premolar
692	46	2010-11-22	Group 2	2010-11-22	2011-03-21	3	#NULL!	#NULL!	0	0		0	#NULL!	1	0	2	2016-09-21	55	W	0	0	2016-09-21	2016-09-21	false	Molars	5.83175	VitE	W	Molar
692	47	2011-02-08	Group 2	2011-03-14	2011-03-21	1	#NULL!	#NULL!	0	0		0	#NULL!	3	0	2	2016-09-21	55	W	0	0	2016-09-21	2016-09-21	false	Molars	5.61819	VitE	W	Molar
693	35	2003-02-04	Group1	2003-02-04	2003-02-11	1	#NULL!	#NULL!	0	0		extracted	2006-05-11	0	0	0	2006-09-04	69	M	3	1	2006-05-11	2006-05-11	false	Premolars	3.26359	Trep1	M	Premolar
693	25	2004-08-05	Group1	2004-08-05	2004-08-05	0	#NULL!	#NULL!	0	0		0	#NULL!	1	0	0	2006-09-04	71	M	0	0	2006-09-04	2006-09-04	true	Premolars	2.08081	VitE	M	Premolar
694	22	2005-06-23	Group1	2005-06-23	2005-06-23	0	#NULL!	#NULL!	0	0		0	#NULL!	0	0	0	2009-10-06	54	W	0	0	2009-10-06	2009-10-06	true	Anterior	4.28757	VitE	W	Anterior
695	36	2007-03-20	Group1	2007-03-20	2007-04-12	2	#NULL!	#NULL!	0	0		extracted	2013-02-21	1	0	1	2015-05-22	66	M	3	1	2013-02-21	2013-02-21	false	Molars	5.92758	VitE	M	Molar
696	17	2001-06-06	Group1	2001-06-06	2001-07-03	1	#NULL!	#NULL!	0	0		0	#NULL!	0	0	0	2007-07-16	42	M	0	0	2007-07-16	2007-07-16	false	Molars	6.10828	VitE	M	Molar
697	37	2010-07-26	Group 2	2010-07-26	2010-10-11	3	2011-07-06	3	0	root end surgery	WR	extracted	2012-12-17	1	0	0	2015-05-18	46	W	3	1	2012-12-17	2011-07-06	false	Molars	0.944579	Trep1	W	Molar
697	15	2014-10-21	Group 3	2014-10-21	2014-12-10	3	#NULL!	#NULL!	0	0		0	#NULL!	5	2	0	2015-05-18	50	W	0	0	2015-05-18	2015-05-18	false	Premolars	0.572223	Trep1	W	Premolar
698	16	2004-06-23	Group1	2004-06-23	2004-09-02	3	#NULL!	#NULL!	0	0		0	#NULL!	0	0	0	2013-12-03	61	M	0	0	2013-12-03	2013-12-03	false	Molars	9.44579	Trep1	M	Molar
699	44	2006-08-31	Group1	2006-08-31	2006-11-07	2	#NULL!	#NULL!	0	0		0	#NULL!	0	0	7	2016-09-08	62	M	0	0	2016-09-08	2016-09-08	false	Premolars	10.0235	Trep1	M	Premolar
699	21	2013-01-21	Group 3	2013-01-21	2013-02-20	1	#NULL!	#NULL!	0	0		0	#NULL!	3	0	5	2016-09-08	68	M	0	0	2016-09-08	2016-09-08	false	Anterior	3.63047	Trep1	M	Anterior
699	12	2013-01-29	Group 3	2013-01-29	2013-02-20	2	#NULL!	#NULL!	0	0		0	#NULL!	4	0	5	2016-09-08	68	M	0	0	2016-09-08	2016-09-08	false	Anterior	3.60857	Trep1	M	Anterior
700	14	2007-07-02	Group1	2007-07-02	2007-07-30	1	#NULL!	#NULL!	0	0		extracted	2008-02-12	0	0	12	2016-09-08	56	W	3	1	2008-02-12	2008-02-12	false	Premolars	0.61603	Trep1	W	Premolar
701	45	2010-11-18	Group 2	2010-11-18	2010-12-21	1	#NULL!	#NULL!	0	0		0	#NULL!	0	0	5	2016-07-15	64	W	0	0	2016-07-15	2016-07-15	false	Premolars	5.65652	VitE	W	Premolar
702	21	2006-03-30	Group1	2006-03-30	2006-05-18	3	2008-10-09	3	0	root end surgery	WR	0	#NULL!	0	0	0	2009-04-30	22	W	2	1	2009-04-30	2008-10-09	false	Anterior	2.52983	Trep1	W	Anterior
702	11	2006-03-30	Group1	2006-03-30	2006-05-18	3	2008-10-09	3	0	root end surgery	WR	0	#NULL!	0	0	0	2009-04-30	22	W	2	1	2009-04-30	2008-10-09	false	Anterior	2.52983	Trep1	W	Anterior
702	14	2006-12-12	Group1	2006-12-12	2007-01-15	1	#NULL!	#NULL!	0	0		0	#NULL!	2	1	0	2009-04-30	23	W	0	0	2009-04-30	2009-04-30	false	Premolars	2.38198	VitE	W	Premolar
703	45	1999-09-27	Group1	1999-10-26	1999-11-24	1	#NULL!	#NULL!	0	0		0	#NULL!	0	0	0	2005-05-25	24	W	0	0	2005-05-25	2005-05-25	false	Premolars	5.65926	Trep1	W	Premolar
704	13	2015-08-21	Group 3	2015-08-21	2015-10-21	3	#NULL!	#NULL!	0	0		0	#NULL!	0	0	1	2016-09-07	65	W	0	0	2016-09-07	2016-09-07	false	Anterior	1.04862	VitE	W	Anterior
704	17	2016-06-17	Group 3	2016-06-17	2016-07-18	3	#NULL!	#NULL!	0	0		0	#NULL!	3	0	0	2016-09-07	66	W	0	0	2016-09-07	2016-09-07	false	Molars	0.224509	VitE	W	Molar
705	47	2003-10-27	Group1	2003-10-27	2003-12-04	4	#NULL!	#NULL!	0	0		0	#NULL!	0	0	0	2011-07-20	77	W	0	0	2011-07-20	2011-07-20	false	Molars	7.72912	VitE	W	Molar
706	26	2003-06-03	Group1	2003-06-03	2003-09-30	1	#NULL!	#NULL!	0	0		extracted	2008-01-25	0	0	0	2016-03-10	64	W	3	1	2008-01-25	2008-01-25	false	Molars	4.64623	Trep1	W	Molar
707	44	2007-03-05	Group1	2007-03-05	2007-07-03	1	#NULL!	#NULL!	0	0		0	#NULL!	0	0	0	2009-06-02	74	M	0	0	2009-06-02	2009-06-02	false	Premolars	2.24509	Trep1	M	Premolar
707	42	2008-08-04	Group1	2008-08-04	2008-09-08	1	#NULL!	#NULL!	0	0		0	#NULL!	1	0	0	2009-06-02	75	M	0	0	2009-06-02	2009-06-02	false	Anterior	0.826849	Trep1	M	Anterior
707	23	2008-11-03	Group1	2008-11-03	2008-11-24	1	#NULL!	#NULL!	0	0		0	#NULL!	2	0	0	2009-06-02	76	M	0	0	2009-06-02	2009-06-02	false	Anterior	0.577699	Trep1	M	Anterior
708	26	2003-08-07	Group1	2003-08-07	2003-08-14	1	#NULL!	#NULL!	0	0		0	#NULL!	0	0	2	2016-05-04	48	M	0	0	2016-05-04	2016-05-04	false	Molars	12.7422	VitE	M	Molar
708	16	2009-10-07	Group 2	2009-10-07	2009-10-21	1	#NULL!	#NULL!	0	0		0	#NULL!	1	0	2	2016-05-04	54	M	0	0	2016-05-04	2016-05-04	false	Molars	6.57372	VitE	M	Molar
709	45	2000-11-23	Group1	2000-11-24	2000-12-07	2	#NULL!	#NULL!	0	0		0	#NULL!	0	0	0	2003-11-13	73	W	0	0	2003-11-13	2003-11-13	false	Premolars	2.97063	Trep1	W	Premolar
709	47	2001-03-08	Group1	2001-03-08	2001-03-29	1	#NULL!	#NULL!	0	0		extracted	2003-08-28	1	0	0	2003-11-13	73	W	3	1	2003-08-28	2003-08-28	false	Molars	2.47233	VitE	W	Molar
709	43	2003-09-04	Group1	2003-09-04	2003-09-04	0	#NULL!	#NULL!	0	0		0	#NULL!	3	0	0	2003-11-13	76	W	0	0	2003-11-13	2003-11-13	true	Anterior	0.191654	Trep1	W	Anterior
710	13	2001-10-24	Group1	2001-11-13	2001-11-13	0	#NULL!	#NULL!	0	0		0	#NULL!	0	0	0	2006-11-08	46	M	0	0	2006-11-08	2006-11-08	true	Anterior	5.04049	Trep1	M	Anterior
710	46	2001-12-10	Group1	2001-12-10	2002-03-12	2	#NULL!	#NULL!	0	0		0	#NULL!	1	0	0	2006-11-08	46	M	0	0	2006-11-08	2006-11-08	false	Molars	4.91181	Trep1	M	Molar
710	37	2002-02-07	Group1	2002-02-07	2002-07-15	3	2002-07-18	2	retreatment	0		0	#NULL!	3	0	0	2006-11-08	47	M	1	1	2006-11-08	2002-07-18	false	Molars	0.440804	VitE	M	Molar
710	22	2002-04-10	Group1	2002-04-10	2002-04-10	0	2002-04-11	1	retreatment	0		0	#NULL!	4	0	0	2006-11-08	47	M	1	1	2006-11-08	2002-04-11	true	Anterior	0.00273791	VitE	M	Anterior
710	12	2004-06-08	Group1	2004-06-08	2004-06-08	0	#NULL!	#NULL!	0	0		0	#NULL!	8	0	0	2006-11-08	49	M	0	0	2006-11-08	2006-11-08	true	Anterior	2.41758	VitE	M	Anterior
710	21	2004-07-06	Group1	2004-07-06	2004-07-06	0	#NULL!	#NULL!	0	0		0	#NULL!	9	0	0	2006-11-08	49	M	0	0	2006-11-08	2006-11-08	true	Anterior	2.34091	VitE	M	Anterior
710	24	2004-10-20	Group1	2004-10-20	2004-11-08	1	#NULL!	#NULL!	0	0		0	#NULL!	10	0	0	2006-11-08	49	M	0	0	2006-11-08	2006-11-08	false	Premolars	2.0507	Trep1	M	Premolar
710	43	2005-02-02	Group1	2005-02-02	2005-02-02	0	#NULL!	#NULL!	0	0		0	#NULL!	11	0	0	2006-11-08	50	M	0	0	2006-11-08	2006-11-08	true	Anterior	1.76321	VitE	M	Anterior
711	25	2001-03-16	Group1	2001-03-16	2002-04-16	4	#NULL!	#NULL!	0	0		0	#NULL!	0	0	0	2011-08-03	15	W	0	0	2011-08-03	2011-08-03	false	Premolars	10.3822	VitE	W	Premolar
711	27	2010-10-07	Group 2	2010-10-07	2010-11-02	3	#NULL!	#NULL!	0	0		0	#NULL!	3	0	0	2011-08-03	25	W	0	0	2011-08-03	2011-08-03	false	Molars	0.821373	VitE	W	Molar
712	23	2005-12-28	Group1	2005-12-28	2006-03-09	2	#NULL!	#NULL!	0	0		0	#NULL!	0	0	0	2008-02-27	68	M	0	0	2008-02-27	2008-02-27	false	Anterior	2.16569	Trep1	M	Anterior
713	17	2002-09-04	Group1	2002-09-04	2002-11-27	1	#NULL!	#NULL!	0	0		extracted	2009-07-21	0	0	0	2016-05-03	55	W	3	1	2009-07-21	2009-07-21	false	Molars	6.87763	VitE	W	Molar
713	26	2009-02-26	Group 2	2009-02-26	2009-04-29	3	#NULL!	#NULL!	0	0		extracted	2010-08-19	2	0	8	2016-05-03	62	W	3	1	2010-08-19	2010-08-19	false	Molars	1.47573	Trep1	W	Molar
713	34	2010-02-09	Group 2	2010-02-09	2010-03-04	1	#NULL!	#NULL!	0	0		extracted	2012-04-25	4	0	7	2016-05-03	63	W	3	1	2012-04-25	2012-04-25	false	Premolars	2.20676	Trep1	W	Premolar
713	44	2015-03-10	Group 3	2015-03-10	2015-03-10	0	#NULL!	#NULL!	0	0		0	#NULL!	5	0	2	2016-05-03	68	W	0	0	2016-05-03	2016-05-03	true	Premolars	1.14992	Trep1	W	Premolar
714	45	2002-01-07	Group1	2002-01-07	2002-03-27	10	#NULL!	#NULL!	0	0		0	#NULL!	0	0	0	2010-07-14	41	M	0	0	2010-07-14	2010-07-14	false	Premolars	8.5149	Trep1	M	Premolar
715	26	2004-04-21	Group1	2004-04-21	2004-05-12	1	#NULL!	#NULL!	0	0		extracted	2008-06-17	0	0	6	2016-09-02	45	M	3	1	2008-06-17	2008-06-17	false	Molars	4.15615	Trep1	M	Molar
716	24	2001-05-22	Group1	2001-05-22	2001-06-25	2	#NULL!	#NULL!	0	0		extracted	2001-11-16	2	0	0	2007-07-11	62	W	3	1	2001-11-16	2001-11-16	false	Premolars	0.487348	Trep1	W	Premolar
717	24	2005-05-09	Group1	2005-05-09	2005-07-04	3	#NULL!	#NULL!	0	0		0	#NULL!	0	0	11	2016-07-04	69	W	0	0	2016-07-04	2016-07-04	false	Premolars	11.1542	VitE	W	Premolar
717	36	2007-04-17	Group1	2007-04-17	2007-05-07	2	#NULL!	#NULL!	0	0		0	#NULL!	2	0	11	2016-07-04	71	W	0	0	2016-07-04	2016-07-04	false	Molars	9.21581	VitE	W	Molar
718	25	2009-01-12	Group 2	2009-01-12	2009-02-11	1	#NULL!	#NULL!	0	0		0	#NULL!	0	0	6	2016-04-28	39	W	0	0	2016-04-28	2016-04-28	false	Premolars	7.29106	VitE	W	Premolar
718	44	2009-01-15	Group 2	2009-01-15	2009-02-11	1	#NULL!	#NULL!	0	0		0	#NULL!	1	0	6	2016-04-28	39	W	0	0	2016-04-28	2016-04-28	false	Premolars	7.28284	VitE	W	Premolar
718	37	2012-01-10	Group 3	2012-01-10	2012-02-09	1	#NULL!	#NULL!	0	0		0	#NULL!	2	0	6	2016-04-28	42	W	0	0	2016-04-28	2016-04-28	false	Molars	4.29852	Trep1	W	Molar
719	24	2008-10-02	Group1	2008-10-02	2008-10-02	0	#NULL!	#NULL!	0	0		extracted	2008-11-11	0	0	0	2016-04-19	79	W	3	1	2008-11-11	2008-11-11	true	Premolars	0.109516	VitE	W	Premolar
720	37	2002-05-10	Group1	2002-05-10	2002-06-24	3	#NULL!	#NULL!	0	0		0	#NULL!	0	0	0	2004-06-01	38	W	0	0	2004-06-01	2004-06-01	false	Molars	2.06165	Trep1	W	Molar
720	47	2002-06-04	Group1	2002-06-04	2002-06-24	2	#NULL!	#NULL!	0	0		0	#NULL!	2	0	0	2004-06-01	38	W	0	0	2004-06-01	2004-06-01	false	Molars	1.9932	Trep1	W	Molar
721	16	2000-05-11	Group1	2000-05-11	2000-08-22	3	2009-09-23	5	retreatment	0		0	#NULL!	0	0	18	2016-09-19	51	W	1	1	2016-09-19	2009-09-23	false	Molars	9.36913	Trep1	W	Molar
721	27	2001-10-04	Group1	2001-10-04	2002-02-07	5	#NULL!	#NULL!	0	0		extracted	2009-08-27	1	0	0	2016-09-19	52	W	3	1	2009-08-27	2009-08-27	false	Molars	7.89613	VitE	W	Molar
721	25	2005-08-09	Group1	2005-08-09	2005-08-09	0	#NULL!	#NULL!	0	0		extracted	2009-08-27	2	0	9	2016-09-19	56	W	3	1	2009-08-27	2009-08-27	true	Premolars	4.04937	Trep1	W	Premolar
721	13	2009-11-23	Group 2	2009-11-23	2009-12-14	1	#NULL!	#NULL!	0	0		0	#NULL!	5	0	9	2016-09-19	60	W	0	0	2016-09-19	2016-09-19	false	Anterior	6.82287	Trep1	W	Anterior
722	14	2011-02-14	Group 2	2011-02-14	2011-02-14	0	#NULL!	#NULL!	0	0		0	#NULL!	0	0	0	2016-05-27	73	W	0	0	2016-05-27	2016-05-27	true	Premolars	5.28143	VitE	W	Premolar
723	34	2000-02-01	Group1	2000-02-01	2000-03-14	2	#NULL!	#NULL!	0	0		0	#NULL!	0	0	0	2003-12-11	60	W	0	0	2003-12-11	2003-12-11	false	Premolars	3.85772	Trep1	W	Premolar
724	17	1999-10-07	Group1	1999-10-07	1999-11-24	1	#NULL!	#NULL!	0	0		0	#NULL!	0	0	2	2015-09-08	50	M	0	0	2015-09-08	2015-09-08	false	Molars	15.921	VitE	M	Molar
724	46	2007-12-11	Group1	2007-12-11	2008-01-29	1	#NULL!	#NULL!	0	0		0	#NULL!	5	1	3	2015-09-08	58	M	0	0	2015-09-08	2015-09-08	false	Molars	7.74281	Trep1	M	Molar
725	23	2002-04-10	Group1	2002-04-10	2002-05-07	2	2007-05-21	1	0	root end surgery	WR	extracted	2012-06-26	0	0	0	2012-12-07	66	W	3	1	2012-06-26	2007-05-21	false	Anterior	5.11168	Trep1	W	Anterior
725	22	2012-06-11	Group 3	2012-06-11	2012-07-03	2	#NULL!	#NULL!	0	0		0	#NULL!	2	1	0	2012-12-07	76	W	0	0	2012-12-07	2012-12-07	false	Anterior	0.490086	Trep1	W	Anterior
726	41	2006-10-24	Group1	2006-10-24	2006-11-15	1	#NULL!	#NULL!	0	0		extracted	2009-02-17	0	0	8	2016-09-12	69	M	3	1	2009-02-17	2009-02-17	false	Anterior	2.31901	Trep1	M	Anterior
727	17	2001-10-29	Group1	2001-10-29	2001-11-05	1	#NULL!	#NULL!	0	0		extracted	2013-09-12	0	0	2	2016-06-06	66	W	3	1	2013-09-12	2013-09-12	false	Molars	11.8716	Trep1	W	Molar
728	45	2004-01-22	Group1	2004-01-22	2004-03-18	2	#NULL!	#NULL!	0	0		extracted	2016-02-22	0	0	1	2016-07-27	63	W	3	1	2016-02-22	2016-02-22	false	Premolars	12.0851	Trep1	W	Premolar
729	36	2008-09-09	Group1	2008-09-09	2008-09-16	1	#NULL!	#NULL!	0	0		0	#NULL!	0	0	0	2012-07-03	69	M	0	0	2012-07-03	2012-07-03	false	Molars	3.81391	Trep1	M	Molar
729	35	2008-11-11	Group1	2008-11-11	2008-11-11	0	#NULL!	#NULL!	0	0		0	#NULL!	1	0	0	2012-07-03	70	M	0	0	2012-07-03	2012-07-03	true	Premolars	3.64142	VitE	M	Premolar
730	25	2013-06-10	Group 3	2013-06-10	2013-06-10	0	#NULL!	#NULL!	0	0		0	#NULL!	0	0	2	2016-09-22	40	W	0	0	2016-09-22	2016-09-22	true	Premolars	3.28549	Trep1	W	Premolar
731	27	2004-09-17	Group1	2004-09-17	2004-10-12	1	#NULL!	#NULL!	0	0		extracted	2010-06-10	0	0	0	2015-12-03	61	W	3	1	2010-06-10	2010-06-10	false	Molars	5.72771	Trep1	W	Molar
731	46	2010-07-12	Group1	2010-07-12	2010-07-12	0	#NULL!	#NULL!	0	0		extracted	2010-07-26	2	0	0	2015-12-03	67	W	3	1	2010-07-26	2010-07-26	true	Molars	0.0383308	Trep1	W	Molar
732	35	2005-12-14	Group1	2005-12-14	2005-12-14	0	#NULL!	#NULL!	0	0		0	#NULL!	0	0	0	2016-08-01	70	M	0	0	2016-08-01	2016-08-01	true	Premolars	10.6313	VitE	M	Premolar
732	43	2006-04-27	Group1	2006-04-27	2006-04-27	0	#NULL!	#NULL!	0	0		0	#NULL!	1	0	0	2016-08-01	70	M	0	0	2016-08-01	2016-08-01	true	Anterior	10.2644	VitE	M	Anterior
732	33	2006-04-27	Group1	2006-04-27	2006-04-27	0	#NULL!	#NULL!	0	0		0	#NULL!	1	0	3	2016-08-01	70	M	0	0	2016-08-01	2016-08-01	true	Anterior	10.2644	VitE	M	Anterior
733	25	2000-05-25	Group1	2000-05-25	2000-06-19	2	2014-09-03	5	retreatment	0		0	#NULL!	0	0	0	2014-12-22	30	M	1	1	2014-12-22	2014-09-03	false	Premolars	14.2755	VitE	M	Premolar
733	15	2001-08-15	Group1	2001-08-15	2001-08-30	2	#NULL!	#NULL!	0	0		0	#NULL!	1	0	0	2014-12-22	31	M	0	0	2014-12-22	2014-12-22	false	Premolars	13.3528	VitE	M	Premolar
734	15	2002-08-26	Group1	2002-08-26	2003-03-11	3	#NULL!	#NULL!	0	0		0	#NULL!	0	0	0	2004-07-16	63	W	0	0	2004-07-16	2004-07-16	false	Premolars	1.88916	Trep1	W	Premolar
734	13	2002-08-26	Group1	2002-08-26	2003-03-11	3	#NULL!	#NULL!	0	0		0	#NULL!	0	0	0	2004-07-16	63	W	0	0	2004-07-16	2004-07-16	false	Anterior	1.88916	Trep1	W	Anterior
735	46	2001-01-18	Group1	2001-01-18	2001-01-29	1	#NULL!	#NULL!	0	0		extracted	2015-01-15	1	0	9	2016-07-12	64	M	3	1	2015-01-15	2015-01-15	false	Molars	13.9907	Trep1	M	Molar
735	24	2001-02-14	Group1	2001-02-14	2001-03-07	1	#NULL!	#NULL!	0	0		0	#NULL!	2	0	12	2016-07-12	64	M	0	0	2016-07-12	2016-07-12	false	Premolars	15.4062	VitE	M	Premolar
735	41	2015-06-30	Group 3	2015-06-30	2015-06-30	0	#NULL!	#NULL!	0	0		extracted	2016-02-10	3	2	1	2016-07-12	79	M	3	1	2016-02-10	2016-02-10	true	Anterior	0.61603	VitE	M	Anterior
735	31	2015-06-30	Group 3	2015-06-30	2015-06-30	0	#NULL!	#NULL!	0	0		extracted	2016-02-10	3	2	1	2016-07-12	79	M	3	1	2016-02-10	2016-02-10	true	Anterior	0.61603	VitE	M	Anterior
735	32	2015-06-30	Group 3	2015-06-30	2015-06-30	0	#NULL!	#NULL!	0	0		0	#NULL!	3	2	2	2016-07-12	79	M	0	0	2016-07-12	2016-07-12	true	Anterior	1.03493	VitE	M	Anterior
736	14	2003-12-22	Group1	2003-12-22	2004-02-03	2	2004-12-28	2	0	root end surgery	WR	extracted	2005-07-13	0	0	0	2012-10-11	69	W	3	1	2005-07-13	2004-12-28	false	Premolars	1.0185	Trep1	W	Premolar
737	13	1999-07-09	Group1	1999-07-09	1999-07-19	1	#NULL!	#NULL!	0	0		0	#NULL!	0	0	1	2015-10-13	61	W	0	0	2015-10-13	2015-10-13	false	Anterior	16.2632	Trep1	W	Anterior
737	21	2005-06-01	Group1	2005-06-01	2005-06-01	0	#NULL!	#NULL!	0	0		0	#NULL!	1	0	1	2015-10-13	66	W	0	0	2015-10-13	2015-10-13	true	Anterior	10.3657	Trep1	W	Anterior
738	38	2003-10-06	Group1	2003-10-06	2004-02-05	6	#NULL!	#NULL!	0	0		0	#NULL!	0	0	8	2016-05-10	62	M	0	0	2016-05-10	2016-05-10	false	Molars	12.5944	Trep1	M	Molar
739	15	2015-12-10	Group 3	2015-12-10	2015-12-10	0	#NULL!	#NULL!	0	0		0	#NULL!	0	0	1	2016-05-03	72	W	0	0	2016-05-03	2016-05-03	true	Premolars	0.396997	Trep1	W	Premolar
740	12	2007-10-17	Group1	2007-10-17	2007-10-29	1	#NULL!	#NULL!	0	0		0	#NULL!	0	0	0	2015-01-15	40	M	0	0	2015-01-15	2015-01-15	false	Anterior	7.24725	Trep1	M	Anterior
741	44	2011-02-28	Group 2	2011-02-28	2011-02-28	0	#NULL!	#NULL!	0	0		0	#NULL!	0	0	4	2015-11-13	59	W	0	0	2015-11-13	2015-11-13	true	Premolars	4.70647	VitE	W	Premolar
741	46	2013-10-09	Group 3	2013-10-09	2013-11-05	1	#NULL!	#NULL!	0	0		0	#NULL!	1	0	2	2015-11-13	61	W	0	0	2015-11-13	2015-11-13	false	Molars	2.0945	Trep1	W	Molar
741	24	2014-03-06	Group 3	2014-03-06	2014-03-06	0	#NULL!	#NULL!	0	0		extracted	2014-07-17	3	0	1	2015-11-13	62	W	3	1	2014-07-17	2014-07-17	true	Premolars	0.364142	Trep1	W	Premolar
742	35	2000-10-09	Group1	2000-10-09	2000-10-25	1	#NULL!	#NULL!	0	0		extracted	2007-01-23	0	0	11	2016-08-16	56	W	3	1	2007-01-23	2007-01-23	false	Premolars	6.28898	Trep1	W	Premolar
742	43	2012-02-02	Group 3	2012-02-02	2012-02-16	1	#NULL!	#NULL!	0	0		0	#NULL!	1	0	11	2016-08-16	67	W	0	0	2016-08-16	2016-08-16	false	Anterior	4.53672	Trep1	W	Anterior
743	15	2001-11-02	Group1	2001-11-02	2001-11-22	2	#NULL!	#NULL!	0	0		0	#NULL!	0	0	2	2015-11-02	23	W	0	0	2015-11-02	2015-11-02	false	Premolars	13.9989	VitE	W	Premolar
743	26	2014-10-30	Group 3	2014-10-30	2014-10-30	0	#NULL!	#NULL!	0	0		0	#NULL!	1	0	0	2015-11-02	36	W	0	0	2015-11-02	2015-11-02	true	Molars	1.00755	Trep1	W	Molar
744	36	2005-09-27	Group1	2005-09-27	2005-11-10	2	#NULL!	#NULL!	0	0		extracted	2006-06-20	0	0	0	2016-07-06	48	M	3	1	2006-06-20	2006-06-20	false	Molars	0.728284	Trep1	M	Molar
745	26	2004-09-20	Group1	2004-09-20	2004-10-11	2	#NULL!	#NULL!	0	0		extracted	2007-05-16	0	0	0	2008-06-18	23	M	3	1	2007-05-16	2007-05-16	false	Molars	2.6503	VitE	M	Molar
745	16	2004-12-27	Group1	2004-12-27	2005-02-02	2	#NULL!	#NULL!	0	0		0	#NULL!	1	0	0	2008-06-18	23	M	0	0	2008-06-18	2008-06-18	false	Molars	3.47441	VitE	M	Molar
745	15	2007-03-15	Group1	2007-03-15	2007-05-15	2	#NULL!	#NULL!	0	0		0	#NULL!	3	0	0	2008-06-18	25	M	0	0	2008-06-18	2008-06-18	false	Premolars	1.26218	Trep1	M	Premolar
746	26	2001-03-05	Group1	2001-03-05	2001-06-20	4	#NULL!	#NULL!	0	0		0	#NULL!	0	0	0	2003-06-30	28	M	0	0	2003-06-30	2003-06-30	false	Molars	2.31901	Trep1	M	Molar
747	23	2001-01-18	Group1	2001-01-18	2001-01-18	0	#NULL!	#NULL!	0	0		0	#NULL!	0	0	0	2004-10-19	71	M	0	0	2004-10-19	2004-10-19	true	Anterior	3.75094	Trep1	M	Anterior
747	13	2004-06-15	Group1	2004-06-15	2004-07-05	1	#NULL!	#NULL!	0	0		0	#NULL!	1	0	0	2004-10-19	75	M	0	0	2004-10-19	2004-10-19	false	Anterior	0.344977	Trep1	M	Anterior
748	48	2003-11-28	Group1	2003-11-28	2004-02-18	4	#NULL!	#NULL!	0	0		0	#NULL!	0	0	0	2004-10-13	64	W	0	0	2004-10-13	2004-10-13	false	Molars	0.876131	VitE	W	Molar
749	47	2004-01-14	Group1	2004-01-14	2004-02-03	1	#NULL!	#NULL!	0	0		0	#NULL!	0	0	0	2008-08-13	51	M	0	0	2008-08-13	2008-08-13	false	Molars	4.58052	Trep1	M	Molar
750	15	2001-06-18	Group1	2001-06-18	2001-06-18	0	#NULL!	#NULL!	0	0		0	#NULL!	0	0	0	2005-08-10	65	M	0	0	2005-08-10	2005-08-10	true	Premolars	4.1452	VitE	M	Premolar
750	16	2001-07-25	Group1	2001-07-25	2001-11-19	1	#NULL!	#NULL!	0	0		0	#NULL!	1	0	0	2005-08-10	65	M	0	0	2005-08-10	2005-08-10	false	Molars	4.04389	Trep1	M	Molar
751	45	2004-03-16	Group1	2004-03-16	2004-05-11	2	#NULL!	#NULL!	0	0		extracted	2005-11-10	0	0	2	2016-09-13	60	M	3	1	2005-11-10	2005-11-10	false	Premolars	1.6537	Trep1	M	Premolar
751	43	2015-04-30	Group 3	2015-04-30	2015-05-05	1	#NULL!	#NULL!	0	0		0	#NULL!	1	0	5	2016-09-13	71	M	0	0	2016-09-13	2016-09-13	false	Anterior	1.37443	Trep1	M	Anterior
752	14	2004-06-23	Group1	2004-06-23	2004-06-23	0	2009-02-03	5	retreatment	0		0	#NULL!	0	0	0	2011-03-16	63	W	1	1	2011-03-16	2009-02-03	true	Premolars	4.61612	VitE	W	Premolar
753	23	2005-06-16	Group1	2005-06-16	2005-07-07	1	#NULL!	#NULL!	0	0		extracted	2013-09-24	0	0	0	2016-07-27	58	M	3	1	2013-09-24	2013-09-24	false	Anterior	8.27397	Trep1	M	Anterior
753	44	2009-05-12	Group1	2009-05-12	2009-07-28	1	#NULL!	#NULL!	0	0		0	#NULL!	1	0	0	2016-07-27	62	M	0	0	2016-07-27	2016-07-27	false	Premolars	7.20892	Trep1	M	Premolar
754	15	2003-07-07	Group1	2003-07-07	2003-10-07	4	#NULL!	#NULL!	0	0		0	#NULL!	0	0	1	2016-07-20	58	W	0	0	2016-07-20	2016-07-20	false	Premolars	13.0379	VitE	W	Premolar
754	25	2004-04-19	Group1	2004-04-19	2004-07-26	3	#NULL!	#NULL!	0	0		extracted	2006-11-21	1	0	1	2016-07-20	59	W	3	1	2006-11-21	2006-11-21	false	Premolars	2.59006	VitE	W	Premolar
755	36	2007-07-24	Group1	2007-07-24	2007-08-09	1	#NULL!	#NULL!	0	0		0	#NULL!	0	0	0	2007-10-16	46	W	0	0	2007-10-16	2007-10-16	false	Molars	0.229985	VitE	W	Molar
756	35	2001-12-24	Group1	2001-12-24	2002-01-17	1	#NULL!	#NULL!	0	0		0	#NULL!	0	0	0	2008-09-03	41	W	0	0	2008-09-03	2008-09-03	false	Premolars	6.69419	VitE	W	Premolar
756	34	2002-01-17	Group1	2002-01-17	2002-01-17	0	#NULL!	#NULL!	0	0		extracted	2006-03-27	1	0	0	2008-09-03	41	W	3	1	2006-03-27	2006-03-27	true	Premolars	4.189	VitE	W	Premolar
757	23	2000-10-20	Group1	2000-10-20	2000-12-05	2	#NULL!	#NULL!	0	0		0	#NULL!	0	0	3	2016-03-09	58	W	0	0	2016-03-09	2016-03-09	false	Anterior	15.3843	Trep1	W	Anterior
757	45	2013-11-06	Group 3	2013-11-06	2013-11-06	0	#NULL!	#NULL!	0	0		0	#NULL!	3	0	2	2016-03-09	72	W	0	0	2016-03-09	2016-03-09	true	Premolars	2.33818	Trep1	W	Premolar
758	47	2000-10-25	Group1	2000-10-25	2000-12-05	2	#NULL!	#NULL!	0	0		0	#NULL!	0	0	0	2003-08-05	38	W	0	0	2003-08-05	2003-08-05	false	Molars	2.77624	VitE	W	Molar
759	36	2006-05-15	Group1	2006-05-15	2006-06-12	1	2006-10-09	2	0	root end surgery	WR	0	#NULL!	0	0	0	2010-12-21	57	M	2	1	2010-12-21	2006-10-09	false	Molars	0.402473	Trep1	M	Molar
760	25	2002-05-10	Group1	2002-05-10	2002-06-11	2	#NULL!	#NULL!	0	0		0	#NULL!	0	0	8	2016-08-25	32	M	0	0	2016-08-25	2016-08-25	false	Premolars	14.2946	Trep1	M	Premolar
760	17	2005-11-18	Group1	2005-11-18	2006-02-02	1	#NULL!	#NULL!	0	0		0	#NULL!	1	0	8	2016-08-25	36	M	0	0	2016-08-25	2016-08-25	false	Molars	10.7682	VitE	M	Molar
760	46	2014-04-01	Group 3	2014-04-01	2014-04-09	1	#NULL!	#NULL!	0	0		0	#NULL!	2	0	3	2016-08-25	44	M	0	0	2016-08-25	2016-08-25	false	Molars	2.40115	VitE	M	Molar
760	26	2015-08-18	Group 3	2015-08-18	2015-09-08	1	#NULL!	#NULL!	0	0		0	#NULL!	3	0	1	2016-08-25	45	M	0	0	2016-08-25	2016-08-25	false	Molars	1.02124	Trep1	M	Molar
761	45	2000-03-13	Group1	2000-03-13	2000-03-17	1	#NULL!	#NULL!	0	0		0	#NULL!	0	0	6	2016-09-22	60	M	0	0	2016-09-22	2016-09-22	false	Premolars	16.5288	VitE	M	Premolar
761	16	2004-09-06	Group1	2004-09-06	2004-11-30	3	#NULL!	#NULL!	0	0		extracted	2011-05-12	1	0	6	2016-09-22	65	M	3	1	2011-05-12	2011-05-12	false	Molars	6.67776	Trep1	M	Molar
761	23	2005-11-28	Group1	2005-11-28	2006-02-13	2	#NULL!	#NULL!	0	0		extracted	2012-04-16	2	0	6	2016-09-22	66	M	3	1	2012-04-16	2012-04-16	false	Anterior	6.38207	Trep1	M	Anterior
761	35	2008-06-23	Group1	2008-06-23	2008-07-31	2	2015-03-30	2	retreatment	0		0	#NULL!	3	0	6	2016-09-22	69	M	1	1	2016-09-22	2015-03-30	false	Premolars	6.76538	VitE	M	Premolar
761	17	2008-07-01	Group1	2008-07-01	2008-08-14	3	#NULL!	#NULL!	0	0		0	#NULL!	4	0	6	2016-09-22	69	M	0	0	2016-09-22	2016-09-22	false	Molars	8.22742	Trep1	M	Molar
761	36	2009-09-14	Group 2	2009-09-14	2009-11-10	3	#NULL!	#NULL!	0	0		0	#NULL!	6	0	6	2016-09-22	70	M	0	0	2016-09-22	2016-09-22	false	Molars	7.02274	VitE	M	Molar
761	47	2010-06-15	Group 2	2010-06-15	2010-07-12	1	#NULL!	#NULL!	0	0		extracted	2014-11-24	8	0	3	2016-09-22	71	M	3	1	2014-11-24	2014-11-24	false	Molars	4.44363	Trep1	M	Molar
761	12	2013-06-17	Group 3	2013-06-17	2013-06-24	1	#NULL!	#NULL!	0	0		0	#NULL!	9	0	5	2016-09-22	74	M	0	0	2016-09-22	2016-09-22	false	Anterior	3.26633	Trep1	M	Anterior
761	44	2015-03-02	Group 3	2015-03-02	2015-04-22	1	#NULL!	#NULL!	0	0		0	#NULL!	10	0	3	2016-09-22	75	M	0	0	2016-09-22	2016-09-22	false	Premolars	1.56061	VitE	M	Premolar
761	37	2015-03-02	Group 3	2015-03-02	2015-03-31	1	#NULL!	#NULL!	0	0		0	#NULL!	10	0	3	2016-09-22	75	M	0	0	2016-09-22	2016-09-22	false	Molars	1.56061	VitE	M	Molar
761	15	2015-03-16	Group 3	2015-03-16	2015-04-27	1	#NULL!	#NULL!	0	0		0	#NULL!	12	0	3	2016-09-22	75	M	0	0	2016-09-22	2016-09-22	false	Premolars	1.52228	VitE	M	Premolar
762	25	2003-07-09	Group1	2003-07-09	2003-12-16	2	#NULL!	#NULL!	0	0		0	#NULL!	2	0	0	2008-12-01	40	M	0	0	2008-12-01	2008-12-01	false	Premolars	5.39916	Trep1	M	Premolar
762	37	2005-03-09	Group1	2005-03-09	2005-03-29	1	#NULL!	#NULL!	0	0		0	#NULL!	3	0	0	2008-12-01	42	M	0	0	2008-12-01	2008-12-01	false	Molars	3.73177	VitE	M	Molar
762	36	2006-01-09	Group1	2006-01-09	2006-03-29	4	#NULL!	#NULL!	0	0		0	#NULL!	4	0	0	2008-12-01	43	M	0	0	2008-12-01	2008-12-01	false	Molars	2.89397	VitE	M	Molar
762	12	2007-10-23	Group1	2007-10-23	2007-10-29	1	#NULL!	#NULL!	0	0		0	#NULL!	5	0	0	2008-12-01	45	M	0	0	2008-12-01	2008-12-01	false	Anterior	1.10885	Trep1	M	Anterior
762	18	2008-08-21	Group1	2008-08-21	2008-09-04	1	#NULL!	#NULL!	0	0		0	#NULL!	7	0	0	2008-12-01	45	M	0	0	2008-12-01	2008-12-01	false	Molars	0.279267	Trep1	M	Molar
763	45	2010-01-21	Group1	2010-01-21	2010-01-21	0	#NULL!	#NULL!	0	0		0	#NULL!	0	0	10	2016-09-15	66	M	0	0	2016-09-15	2016-09-15	true	Premolars	6.65039	VitE	M	Premolar
764	45	2007-04-26	Group1	2007-04-26	2007-05-31	2	#NULL!	#NULL!	0	0		0	#NULL!	0	0	0	2015-12-08	46	W	0	0	2015-12-08	2015-12-08	false	Premolars	8.61894	VitE	W	Premolar
764	46	2009-01-07	Group1	2009-01-07	2009-04-30	3	#NULL!	#NULL!	0	0		extracted	2011-03-10	1	0	0	2015-12-08	47	W	3	1	2011-03-10	2011-03-10	false	Molars	2.16843	VitE	W	Molar
765	24	2001-11-08	Group1	2001-11-08	2002-01-21	2	#NULL!	#NULL!	0	0		0	#NULL!	0	0	0	2006-02-14	71	W	0	0	2006-02-14	2006-02-14	false	Premolars	4.2684	Trep1	W	Premolar
766	33	1999-02-04	Group1	1999-02-04	1999-03-02	0	#NULL!	#NULL!	0	0		0	#NULL!	0	0	0	2007-03-15	62	M	0	0	2007-03-15	2007-03-15	false	Anterior	8.10695	Trep1	M	Anterior
766	11	1999-10-14	Group1	1999-10-14	2000-01-27	1	2003-12-19	1	0	root end surgery	WR	0	#NULL!	1	0	0	2007-03-15	62	M	2	1	2007-03-15	2003-12-19	false	Anterior	4.18079	VitE	M	Anterior
766	32	2000-04-18	Group1	2000-04-18	2000-05-18	1	2000-08-03	2	retreatment	0		0	#NULL!	3	0	0	2007-03-15	63	M	1	1	2007-03-15	2000-08-03	false	Anterior	0.292956	VitE	M	Anterior
766	13	2003-07-10	Group1	2003-07-10	2003-10-16	7	#NULL!	#NULL!	0	0		0	#NULL!	6	0	0	2007-03-15	66	M	0	0	2007-03-15	2007-03-15	false	Anterior	3.67975	Trep1	M	Anterior
767	46	2007-10-10	Group1	2007-10-10	2008-01-07	4	#NULL!	#NULL!	0	0		0	#NULL!	0	0	0	2008-01-07	68	M	0	0	2008-01-07	2008-01-07	false	Molars	0.243674	VitE	M	Molar
768	27	2003-05-27	Group1	2003-05-27	2003-07-17	2	#NULL!	#NULL!	0	0		0	#NULL!	0	0	4	2016-09-26	57	M	0	0	2016-09-26	2016-09-26	false	Molars	13.3364	VitE	M	Molar
769	36	2002-10-01	Group1	2002-10-01	2002-11-07	1	2014-06-28	8	0	root end surgery	WR	0	#NULL!	0	0	1	2015-12-08	41	W	2	1	2015-12-08	2014-06-28	false	Molars	11.7402	VitE	W	Molar
769	27	2015-10-27	Group 3	2015-10-27	2015-12-03	2	#NULL!	#NULL!	0	0		0	#NULL!	5	1	0	2015-12-08	54	W	0	0	2015-12-08	2015-12-08	false	Molars	0.114992	Trep1	W	Molar
770	11	2001-01-23	Group1	2001-01-23	2001-03-15	2	2005-04-07	1	0	root end surgery	WR	0	#NULL!	0	0	0	2009-12-02	17	W	2	1	2009-12-02	2005-04-07	false	Anterior	4.20269	Trep1	W	Anterior
771	44	2003-03-28	Group1	2003-03-28	2003-04-01	1	#NULL!	#NULL!	0	0		0	#NULL!	0	0	0	2003-04-25	48	M	0	0	2003-04-25	2003-04-25	false	Premolars	0.0766615	VitE	M	Premolar
772	24	2005-11-15	Group1	2005-11-15	2006-03-09	1	#NULL!	#NULL!	0	0		0	#NULL!	0	0	7	2016-05-02	54	W	0	0	2016-05-02	2016-05-02	false	Premolars	10.4616	VitE	W	Premolar
773	26	2000-01-10	Group1	2000-01-10	2000-04-27	3	2013-07-11	7	retreatment	0		0	#NULL!	0	0	0	2013-09-17	35	M	1	1	2013-09-17	2013-07-11	false	Molars	13.5006	Trep1	M	Molar
773	16	2002-03-21	Group1	2002-03-21	2002-07-18	5	#NULL!	#NULL!	0	0		0	#NULL!	2	0	0	2013-09-17	37	M	0	0	2013-09-17	2013-09-17	false	Molars	11.4937	VitE	M	Molar
773	35	2009-12-22	Group 2	2009-12-22	2010-01-25	1	#NULL!	#NULL!	0	0		0	#NULL!	4	0	0	2013-09-17	45	M	0	0	2013-09-17	2013-09-17	false	Premolars	3.73725	Trep1	M	Premolar
773	46	2010-07-06	Group 2	2010-07-06	2010-10-04	3	#NULL!	#NULL!	0	0		0	#NULL!	5	0	0	2013-09-17	46	M	0	0	2013-09-17	2013-09-17	false	Molars	3.20062	Trep1	M	Molar
773	45	2011-03-29	Group 2	2011-03-29	2011-07-11	3	#NULL!	#NULL!	0	0		0	#NULL!	8	0	0	2013-09-17	46	M	0	0	2013-09-17	2013-09-17	false	Premolars	2.47233	Trep1	M	Premolar
773	47	2011-10-10	Group 2	2011-10-10	2011-11-28	2	#NULL!	#NULL!	0	0		0	#NULL!	9	0	0	2013-09-17	47	M	0	0	2013-09-17	2013-09-17	false	Molars	1.93844	Trep1	M	Molar
774	38	1999-11-22	Group1	1999-11-22	1999-12-22	1	#NULL!	#NULL!	0	0		extracted	2000-04-12	0	0	0	2016-04-14	61	M	3	1	2000-04-12	2000-04-12	false	Molars	0.388783	Trep1	M	Molar
774	26	2012-08-30	Group 3	2012-08-30	2012-11-15	2	#NULL!	#NULL!	0	0		0	#NULL!	1	0	6	2016-04-14	74	M	0	0	2016-04-14	2016-04-14	false	Molars	3.62226	VitE	M	Molar
775	26	2003-10-30	Group1	2003-10-30	2003-10-30	0	#NULL!	#NULL!	0	0		extracted	2003-12-03	0	0	0	2006-12-20	79	W	3	1	2003-12-03	2003-12-03	true	Molars	0.093089	Trep1	W	Molar
776	26	2003-08-07	Group1	2003-08-07	2003-08-29	2	#NULL!	#NULL!	0	0		0	#NULL!	0	0	0	2010-03-29	33	M	0	0	2010-03-29	2010-03-29	false	Molars	6.64217	VitE	M	Molar
777	36	2003-07-07	Group1	2003-07-07	2003-07-30	1	#NULL!	#NULL!	0	0		extracted	2008-07-08	0	0	5	2016-09-08	67	W	3	1	2008-07-08	2008-07-08	false	Molars	5.0049	VitE	W	Molar
777	15	2004-06-23	Group1	2004-06-23	2004-10-11	1	#NULL!	#NULL!	0	0		extracted	2011-02-10	1	0	8	2016-09-08	68	W	3	1	2011-02-10	2011-02-10	false	Premolars	6.63396	Trep1	W	Premolar
777	27	2005-03-02	Group1	2005-03-02	2005-03-30	1	#NULL!	#NULL!	0	0		0	#NULL!	3	0	8	2016-09-08	68	W	0	0	2016-09-08	2016-09-08	false	Molars	11.5211	Trep1	W	Molar
777	26	2005-06-29	Group1	2005-06-29	2005-06-29	0	#NULL!	#NULL!	0	0		0	#NULL!	4	0	8	2016-09-08	69	W	0	0	2016-09-08	2016-09-08	true	Molars	11.1953	VitE	W	Molar
777	45	2007-07-03	Group1	2007-07-03	2007-07-03	0	2008-07-15	1	retreatment	0		0	#NULL!	5	0	8	2016-09-08	71	W	1	1	2016-09-08	2008-07-15	true	Premolars	1.03493	VitE	W	Premolar
777	46	2008-04-22	Group1	2008-04-22	2008-08-07	2	#NULL!	#NULL!	0	0		0	#NULL!	6	0	8	2016-09-08	72	W	0	0	2016-09-08	2016-09-08	false	Molars	8.38074	Trep1	W	Molar
777	16	2009-09-15	Group 2	2009-09-15	2010-01-07	2	#NULL!	#NULL!	0	0		0	#NULL!	8	0	8	2016-09-08	73	W	0	0	2016-09-08	2016-09-08	false	Molars	6.98167	VitE	W	Molar
778	46	2005-09-13	Group1	2005-09-13	2005-10-18	3	#NULL!	#NULL!	0	0		0	#NULL!	0	0	8	2016-07-13	32	W	0	0	2016-07-13	2016-07-13	false	Molars	10.8312	VitE	W	Molar
778	17	2011-07-19	Group 2	2011-07-19	2011-07-26	1	#NULL!	#NULL!	0	0		0	#NULL!	1	0	8	2016-07-13	38	W	0	0	2016-07-13	2016-07-13	false	Molars	4.98574	VitE	W	Molar
779	16	2006-10-18	Group1	2006-10-18	2006-12-06	2	2007-03-06	1	0	root end surgery	WR	0	#NULL!	2	0	1	2016-09-08	46	W	2	1	2016-09-08	2007-03-06	false	Molars	0.38057	Trep1	W	Molar
779	27	2006-12-29	Group1	2006-12-29	2007-02-28	3	#NULL!	#NULL!	0	0		extracted	2015-01-20	3	0	0	2016-09-08	47	W	3	1	2015-01-20	2015-01-20	false	Molars	8.06041	Trep1	W	Molar
779	26	2013-09-17	Group 3	2013-09-17	2013-12-09	2	#NULL!	#NULL!	0	0		0	#NULL!	4	1	1	2016-09-08	53	W	0	0	2016-09-08	2016-09-08	false	Molars	2.97611	VitE	W	Molar
780	38	2005-02-09	Group1	2005-02-09	2005-03-24	2	#NULL!	#NULL!	0	0		extracted	2007-01-29	0	0	0	2016-06-21	61	M	3	1	2007-01-29	2007-01-29	false	Molars	1.96856	VitE	M	Molar
781	23	2003-04-17	Group1	2003-04-17	2003-04-24	0	#NULL!	#NULL!	0	0		0	#NULL!	0	0	1	2015-02-05	53	W	0	0	2015-02-05	2015-02-05	false	Anterior	11.8059	Trep1	W	Anterior
781	35	2010-03-03	Group 2	2010-03-03	2010-03-10	1	#NULL!	#NULL!	0	0		0	#NULL!	1	0	1	2015-02-05	60	W	0	0	2015-02-05	2015-02-05	false	Premolars	4.92824	VitE	W	Premolar
782	33	2003-08-11	Group1	2003-08-11	2003-09-02	2	2004-06-07	1	0	root end surgery	WR	0	#NULL!	0	0	0	2008-05-29	72	W	2	1	2008-05-29	2004-06-07	false	Anterior	0.824111	VitE	W	Anterior
783	37	2007-06-12	Group1	2007-06-12	2007-08-20	2	#NULL!	#NULL!	0	0		extracted	2009-09-03	0	0	0	2015-10-07	57	W	3	1	2009-09-03	2009-09-03	false	Molars	2.22866	VitE	W	Molar
783	23	2009-11-11	Group 2	2009-11-11	2009-11-11	0	#NULL!	#NULL!	0	0		0	#NULL!	1	0	0	2015-10-07	60	W	0	0	2015-10-07	2015-10-07	true	Anterior	5.90294	Trep1	W	Anterior
783	21	2011-12-06	Group 3	2011-12-06	2011-12-06	0	#NULL!	#NULL!	0	0		0	#NULL!	2	0	0	2015-10-07	62	W	0	0	2015-10-07	2015-10-07	true	Anterior	3.83581	Trep1	W	Anterior
783	26	2014-10-09	Group 3	2014-10-09	2014-11-05	1	#NULL!	#NULL!	0	0		0	#NULL!	3	0	0	2015-10-07	65	W	0	0	2015-10-07	2015-10-07	false	Molars	0.993862	Trep1	W	Molar
784	34	2006-11-15	Group1	2006-11-15	2007-01-15	1	#NULL!	#NULL!	0	0		0	#NULL!	2	0	5	2016-04-19	70	M	0	0	2016-04-19	2016-04-19	false	Premolars	9.42663	VitE	M	Premolar
785	47	2006-03-27	Group1	2006-03-27	2006-04-04	0	#NULL!	#NULL!	0	0		0	#NULL!	0	0	2	2016-04-04	69	M	0	0	2016-04-04	2016-04-04	false	Molars	10.0235	VitE	M	Molar
785	36	2006-05-02	Group1	2006-05-02	2006-06-08	2	#NULL!	#NULL!	0	0		extracted	2014-11-06	1	0	2	2016-04-04	69	M	3	1	2014-11-06	2014-11-06	false	Molars	8.5149	Trep1	M	Molar
786	26	2010-03-29	Group 2	2010-03-29	2010-05-20	2	#NULL!	#NULL!	0	0		0	#NULL!	0	0	4	2016-09-20	28	M	0	0	2016-09-20	2016-09-20	false	Molars	6.48063	VitE	M	Molar
787	15	2012-02-29	Group 3	2012-02-29	2012-03-27	1	#NULL!	#NULL!	0	0		0	#NULL!	0	0	5	2014-01-07	65	M	0	0	2014-01-07	2014-01-07	false	Premolars	1.8563	VitE	M	Premolar
787	27	2012-11-05	Group 3	2012-11-05	2012-11-13	1	#NULL!	#NULL!	0	0		0	#NULL!	1	0	3	2014-01-07	66	M	0	0	2014-01-07	2014-01-07	false	Molars	1.17183	Trep1	M	Molar
788	22	2010-09-27	Group 2	2010-09-27	2010-10-11	1	#NULL!	#NULL!	0	0		0	#NULL!	0	0	0	2015-02-09	34	W	0	0	2015-02-09	2015-02-09	false	Anterior	4.36971	Trep1	W	Anterior
788	25	2014-07-30	Group 3	2014-07-30	2014-10-20	2	#NULL!	#NULL!	0	0		0	#NULL!	1	0	0	2015-02-09	38	W	0	0	2015-02-09	2015-02-09	false	Premolars	0.531155	VitE	W	Premolar
789	14	2007-07-02	Group1	2007-07-02	2007-07-12	1	#NULL!	#NULL!	0	0		0	#NULL!	0	0	0	2007-08-07	26	W	0	0	2007-08-07	2007-08-07	false	Premolars	0.0985648	VitE	W	Premolar
790	21	2007-01-23	Group1	2007-01-23	2007-04-12	4	#NULL!	#NULL!	0	0		0	#NULL!	0	0	0	2008-09-25	27	W	0	0	2008-09-25	2008-09-25	false	Anterior	1.67286	Trep1	W	Anterior
791	36	2006-07-19	Group1	2006-07-19	2006-09-25	3	#NULL!	#NULL!	0	0		0	#NULL!	0	0	0	2006-09-25	53	M	0	0	2006-09-25	2006-09-25	false	Molars	0.186178	Trep1	M	Molar
792	41	2006-04-07	Group1	2006-04-07	2006-05-18	3	#NULL!	#NULL!	0	0		0	#NULL!	0	0	3	2014-09-22	32	M	0	0	2014-09-22	2014-09-22	false	Anterior	8.46014	Trep1	M	Anterior
792	31	2006-04-07	Group1	2006-04-07	2006-05-18	3	#NULL!	#NULL!	0	0		0	#NULL!	0	0	3	2014-09-22	32	M	0	0	2014-09-22	2014-09-22	false	Anterior	8.46014	Trep1	M	Anterior
792	12	2008-08-27	Group1	2008-08-27	2008-09-15	1	#NULL!	#NULL!	0	0		0	#NULL!	2	0	3	2014-09-22	34	M	0	0	2014-09-22	2014-09-22	false	Anterior	6.06995	Trep1	M	Anterior
792	46	2013-01-21	Group 3	2013-01-21	2013-02-20	2	#NULL!	#NULL!	0	0		0	#NULL!	6	0	3	2014-09-22	39	M	0	0	2014-09-22	2014-09-22	false	Molars	1.66739	Trep1	M	Molar
793	21	2006-04-05	Group1	2006-04-05	2006-04-19	1	#NULL!	#NULL!	0	0		0	#NULL!	0	0	0	2006-12-13	14	W	0	0	2006-12-13	2006-12-13	false	Anterior	0.689954	Trep1	W	Anterior
793	11	2006-04-05	Group1	2006-04-05	2006-04-19	1	#NULL!	#NULL!	0	0		0	#NULL!	0	0	0	2006-12-13	14	W	0	0	2006-12-13	2006-12-13	false	Anterior	0.689954	Trep1	W	Anterior
794	15	2006-03-21	Group1	2006-03-21	2006-05-31	4	#NULL!	#NULL!	0	0		0	#NULL!	0	0	0	2007-08-20	37	M	0	0	2007-08-20	2007-08-20	false	Premolars	1.4155	VitE	M	Premolar
795	44	2010-12-23	Group 2	2010-12-23	2011-01-04	1	#NULL!	#NULL!	0	0		extracted	2011-05-20	0	0	0	2011-10-10	71	M	3	1	2011-05-20	2011-05-20	false	Premolars	0.405211	Trep1	M	Premolar
795	21	2010-12-23	Group 2	2010-12-23	2011-01-04	1	#NULL!	#NULL!	0	0		0	#NULL!	0	0	0	2011-10-10	71	M	0	0	2011-10-10	2011-10-10	false	Anterior	0.796732	Trep1	M	Anterior
796	26	2006-09-28	Group1	2006-09-28	2007-01-30	4	#NULL!	#NULL!	0	0		0	#NULL!	0	0	0	2013-12-11	26	M	0	0	2013-12-11	2013-12-11	false	Molars	7.20344	Trep1	M	Molar
797	12	2006-03-28	Group1	2006-03-28	2006-04-04	1	#NULL!	#NULL!	0	0		extracted	2012-05-14	0	0	1	2016-08-22	57	W	3	1	2012-05-14	2012-05-14	false	Anterior	6.13018	Trep1	W	Anterior
797	27	2011-11-09	Group 3	2011-11-09	2011-12-14	2	#NULL!	#NULL!	0	0		0	#NULL!	1	0	4	2016-08-22	63	W	0	0	2016-08-22	2016-08-22	false	Molars	4.78587	VitE	W	Molar
797	24	2011-11-09	Group 3	2011-11-09	2011-12-14	2	#NULL!	#NULL!	0	0		0	#NULL!	1	0	4	2016-08-22	63	W	0	0	2016-08-22	2016-08-22	false	Premolars	4.78587	VitE	W	Premolar
797	35	2015-11-11	Group 3	2015-11-11	2015-11-25	1	#NULL!	#NULL!	0	0		0	#NULL!	6	0	2	2016-08-22	67	W	0	0	2016-08-22	2016-08-22	false	Premolars	0.780305	Trep1	W	Premolar
797	34	2015-11-11	Group 3	2015-11-11	2015-11-25	1	#NULL!	#NULL!	0	0		0	#NULL!	6	0	2	2016-08-22	67	W	0	0	2016-08-22	2016-08-22	false	Premolars	0.780305	Trep1	W	Premolar
798	25	2006-10-04	Group1	2006-10-04	2006-11-06	1	#NULL!	#NULL!	0	0		0	#NULL!	0	0	6	2016-04-05	61	M	0	0	2016-04-05	2016-04-05	false	Premolars	9.50329	Trep1	M	Premolar
798	12	2010-03-18	Group 2	2010-03-18	2010-06-09	1	#NULL!	#NULL!	0	0		0	#NULL!	2	0	6	2016-04-05	65	M	0	0	2016-04-05	2016-04-05	false	Anterior	6.05078	Trep1	M	Anterior
799	46	2006-05-24	Group1	2006-05-24	2006-06-12	2	#NULL!	#NULL!	0	0		0	#NULL!	0	0	0	2013-08-12	12	M	0	0	2013-08-12	2013-08-12	false	Molars	7.21987	Trep1	M	Molar
799	16	2010-05-18	Group 2	2010-05-18	2010-07-06	3	#NULL!	#NULL!	0	0		0	#NULL!	1	0	0	2013-08-12	16	M	0	0	2013-08-12	2013-08-12	false	Molars	3.23621	VitE	M	Molar
799	25	2013-05-16	Group 3	2013-06-20	2013-07-04	1	#NULL!	#NULL!	0	0		0	#NULL!	2	0	0	2013-08-12	19	M	0	0	2013-08-12	2013-08-12	false	Premolars	0.240936	Trep1	M	Premolar
800	23	2006-05-17	Group1	2006-05-17	2006-06-19	2	#NULL!	#NULL!	0	0		0	#NULL!	0	0	0	2015-11-19	53	M	0	0	2015-11-19	2015-11-19	false	Anterior	9.50876	Trep1	M	Anterior
801	14	2006-04-03	Group1	2006-04-03	2006-04-20	1	#NULL!	#NULL!	0	0		0	#NULL!	0	0	0	2010-07-06	29	M	0	0	2010-07-06	2010-07-06	false	Premolars	4.25745	VitE	M	Premolar
801	24	2006-08-11	Group1	2006-08-11	2006-08-30	2	#NULL!	#NULL!	0	0		0	#NULL!	1	0	0	2010-07-06	30	M	0	0	2010-07-06	2010-07-06	false	Premolars	3.90152	Trep1	M	Premolar
802	27	2006-06-13	Group1	2006-06-13	2006-07-05	2	#NULL!	#NULL!	0	0		0	#NULL!	0	0	0	2006-11-09	27	M	0	0	2006-11-09	2006-11-09	false	Molars	0.407949	VitE	M	Molar
803	14	2007-02-14	Group1	2007-02-14	2007-02-14	0	2007-02-15	1	0	root end surgery	WR	0	#NULL!	0	0	6	2016-06-01	49	M	2	1	2016-06-01	2007-02-15	true	Premolars	0.00273791	Trep1	M	Premolar
803	25	2013-01-07	Group 3	2013-01-07	2013-02-13	1	#NULL!	#NULL!	0	0		0	#NULL!	1	1	6	2016-06-01	55	M	0	0	2016-06-01	2016-06-01	false	Premolars	3.39775	VitE	M	Premolar
804	44	2008-05-08	Group1	2008-05-08	2008-06-10	2	#NULL!	#NULL!	0	0		0	#NULL!	0	0	0	2010-01-26	65	W	0	0	2010-01-26	2010-01-26	false	Premolars	1.71941	Trep1	W	Premolar
804	33	2009-12-10	Group 2	2009-12-10	2009-12-18	1	#NULL!	#NULL!	0	0		0	#NULL!	1	0	0	2010-01-26	67	W	0	0	2010-01-26	2010-01-26	false	Anterior	0.128682	VitE	W	Anterior
805	22	2006-04-24	Group1	2006-04-24	2006-05-08	1	#NULL!	#NULL!	0	0		0	#NULL!	0	0	0	2006-06-08	62	W	0	0	2006-06-08	2006-06-08	false	Anterior	0.123206	VitE	W	Anterior
805	12	2006-04-24	Group1	2006-04-24	2006-05-08	1	#NULL!	#NULL!	0	0		0	#NULL!	0	0	0	2006-06-08	62	W	0	0	2006-06-08	2006-06-08	false	Anterior	0.123206	VitE	W	Anterior
806	23	2015-05-26	Group 3	2015-05-26	2015-06-22	2	#NULL!	#NULL!	0	0		0	#NULL!	0	0	1	2015-07-16	71	W	0	0	2015-07-16	2015-07-16	false	Anterior	0.139633	Trep1	W	Anterior
807	17	2006-04-13	Group1	2006-04-13	2006-05-04	2	#NULL!	#NULL!	0	0		0	#NULL!	0	0	0	2016-02-25	49	W	0	0	2016-02-25	2016-02-25	false	Molars	9.87017	Trep1	W	Molar
808	47	2006-04-06	Group1	2006-04-06	2006-04-24	1	#NULL!	#NULL!	0	0		0	#NULL!	0	0	0	2006-06-29	39	W	0	0	2006-06-29	2006-06-29	false	Molars	0.229985	Trep1	W	Molar
809	26	2006-04-19	Group1	2006-04-19	2006-06-06	2	#NULL!	#NULL!	0	0		0	#NULL!	0	0	0	2016-06-15	34	W	0	0	2016-06-15	2016-06-15	false	Molars	10.1576	Trep1	W	Molar
810	15	2006-05-10	Group1	2006-05-10	2006-06-13	1	#NULL!	#NULL!	0	0		0	#NULL!	0	0	1	2012-04-05	60	W	0	0	2012-04-05	2012-04-05	false	Premolars	5.90567	Trep1	W	Premolar
811	46	2006-04-19	Group1	2006-04-19	2006-08-30	2	#NULL!	#NULL!	0	0		0	#NULL!	0	0	0	2009-12-10	27	W	0	0	2009-12-10	2009-12-10	false	Molars	3.64416	Trep1	W	Molar
811	25	2007-08-17	Group1	2007-08-17	2007-09-20	1	#NULL!	#NULL!	0	0		0	#NULL!	1	0	0	2009-12-10	29	W	0	0	2009-12-10	2009-12-10	false	Premolars	2.31627	Trep1	W	Premolar
811	36	2008-02-27	Group1	2008-02-27	2008-03-03	1	#NULL!	#NULL!	0	0		0	#NULL!	2	0	0	2009-12-10	29	W	0	0	2009-12-10	2009-12-10	false	Molars	1.78512	Trep1	W	Molar
812	36	2006-03-31	Group1	#NULL!	2006-07-13	2	#NULL!	#NULL!	0	0		0	#NULL!	0	0	0	2006-07-18	21	M	0	0	2006-07-18	2006-07-18	false	Molars	0.298432	VitE	M	Molar
813	22	2006-06-14	Group1	2006-06-14	2006-06-27	1	#NULL!	#NULL!	0	0		0	#NULL!	0	0	0	2006-07-10	64	W	0	0	2006-07-10	2006-07-10	false	Anterior	0.0711857	Trep1	W	Anterior
814	21	2007-01-25	Group1	2007-01-25	2007-04-10	2	#NULL!	#NULL!	0	0		0	#NULL!	0	0	0	2015-06-25	47	M	0	0	2015-06-25	2015-06-25	false	Anterior	8.4136	Trep1	M	Anterior
814	27	2014-09-22	Group 3	2014-09-22	2014-10-02	1	#NULL!	#NULL!	0	0		0	#NULL!	1	0	0	2015-06-25	55	M	0	0	2015-06-25	2015-06-25	false	Molars	0.755663	VitE	M	Molar
815	36	2006-04-20	Group1	2006-04-20	2006-05-04	1	#NULL!	#NULL!	0	0		0	#NULL!	0	0	0	2006-05-04	79	M	0	0	2006-05-04	2006-05-04	false	Molars	0.0383308	Trep1	M	Molar
816	25	2012-01-16	Group 3	2012-01-23	2012-01-23	0	#NULL!	#NULL!	0	0		0	#NULL!	0	0	5	2016-09-06	30	W	0	0	2016-09-06	2016-09-06	true	Premolars	4.64076	Trep1	W	Premolar
816	26	2015-10-21	Group 3	2015-12-02	2015-12-02	1	#NULL!	#NULL!	0	0		0	#NULL!	1	0	0	2016-09-06	34	W	0	0	2016-09-06	2016-09-06	true	Molars	0.878869	VitE	W	Molar
817	14	2006-08-30	Group1	2006-08-30	2007-04-17	2	#NULL!	#NULL!	0	0		0	#NULL!	0	0	0	2007-07-25	40	M	0	0	2007-07-25	2007-07-25	false	Premolars	0.900773	Trep1	M	Premolar
818	15	2006-05-03	Group1	2006-05-03	2006-05-03	0	#NULL!	#NULL!	0	0		0	#NULL!	0	0	0	2006-05-30	27	M	0	0	2006-05-30	2006-05-30	true	Premolars	0.0739236	VitE	M	Premolar
819	27	2006-10-23	Group1	2006-10-23	2006-10-30	1	#NULL!	#NULL!	0	0		0	#NULL!	1	0	0	2010-09-13	65	W	0	0	2010-09-13	2010-09-13	false	Molars	3.89057	VitE	W	Molar
820	13	2006-09-21	Group1	2006-09-21	2007-01-10	3	2007-03-08	1	0	root end surgery	WR	0	#NULL!	0	0	0	2007-05-08	69	W	2	1	2007-05-08	2007-03-08	false	Anterior	0.459969	Trep1	W	Anterior
820	43	2006-09-27	Group1	2006-09-27	2007-01-10	2	#NULL!	#NULL!	0	0		0	#NULL!	1	0	0	2007-05-08	69	W	0	0	2007-05-08	2007-05-08	false	Anterior	0.610554	Trep1	W	Anterior
820	42	2006-09-27	Group1	2006-09-27	2007-01-10	3	#NULL!	#NULL!	0	0		0	#NULL!	1	0	0	2007-05-08	69	W	0	0	2007-05-08	2007-05-08	false	Anterior	0.610554	Trep1	W	Anterior
821	36	2006-07-05	Group1	2006-07-05	2006-11-15	2	#NULL!	#NULL!	0	0		0	#NULL!	0	0	0	2011-05-26	13	M	0	0	2011-05-26	2011-05-26	false	Molars	4.88991	Trep1	M	Molar
822	25	2006-05-23	Group1	2006-05-23	2006-06-29	2	#NULL!	#NULL!	0	0		0	#NULL!	0	0	0	2006-06-29	55	M	0	0	2006-06-29	2006-06-29	false	Premolars	0.101303	Trep1	M	Premolar
823	16	2008-06-04	Group1	2008-06-04	2008-07-07	1	#NULL!	#NULL!	0	0		0	#NULL!	0	0	0	2008-07-18	17	M	0	0	2008-07-18	2008-07-18	false	Molars	0.120468	Trep1	M	Molar
824	16	2010-03-22	Group 2	2010-03-22	2010-04-26	2	#NULL!	#NULL!	0	0		0	#NULL!	0	0	10	2016-06-28	43	W	0	0	2016-06-28	2016-06-28	false	Molars	6.26982	VitE	W	Molar
825	27	2006-05-05	Group1	2006-05-05	2006-05-23	2	#NULL!	#NULL!	0	0		0	#NULL!	0	0	0	2016-07-13	59	M	0	0	2016-07-13	2016-07-13	false	Molars	10.1905	VitE	M	Molar
826	36	2009-04-22	Group 2	2009-04-22	2009-05-28	1	#NULL!	#NULL!	0	0		0	#NULL!	1	0	0	2009-06-19	28	M	0	0	2009-06-19	2009-06-19	false	Molars	0.158799	VitE	M	Molar
827	24	2009-01-15	Group 2	2009-01-15	2009-06-18	2	#NULL!	#NULL!	0	0		0	#NULL!	0	0	0	2015-09-07	28	M	0	0	2015-09-07	2015-09-07	false	Premolars	6.64217	VitE	M	Premolar
827	15	2009-04-15	Group1	2009-04-27	2009-08-10	1	#NULL!	#NULL!	0	0		0	#NULL!	1	0	0	2015-09-07	28	M	0	0	2015-09-07	2015-09-07	false	Premolars	6.39576	Trep1	M	Premolar
828	46	2008-04-14	Group1	2008-04-14	2008-08-11	3	#NULL!	#NULL!	0	0		0	#NULL!	0	0	0	2010-03-31	45	W	0	0	2010-03-31	2010-03-31	false	Molars	1.96034	Trep1	W	Molar
829	37	2009-05-28	Group 2	2009-05-28	2009-06-17	1	#NULL!	#NULL!	0	0		extracted	2013-10-02	0	0	2	2014-01-03	59	M	3	1	2013-10-02	2013-10-02	false	Molars	4.3478	Trep1	M	Molar
829	11	2013-11-13	Group 3	2013-11-13	2013-11-13	0	#NULL!	#NULL!	0	0		0	#NULL!	1	0	1	2014-01-03	64	M	0	0	2014-01-03	2014-01-03	true	Anterior	0.139633	Trep1	M	Anterior
830	26	2007-02-27	Group1	2007-02-27	2007-05-23	2	#NULL!	#NULL!	0	0		0	#NULL!	0	0	5	2015-04-14	73	W	0	0	2015-04-14	2015-04-14	false	Molars	8.12612	Trep1	W	Molar
831	36	2009-09-01	Group 2	2009-09-29	2009-11-23	4	#NULL!	#NULL!	0	0		0	#NULL!	0	0	0	2009-11-23	45	W	0	0	2009-11-23	2009-11-23	false	Molars	0.227247	Trep1	W	Molar
832	25	2013-06-27	Group 3	2013-06-27	2013-07-11	1	#NULL!	#NULL!	0	0		0	#NULL!	0	0	3	2016-07-07	37	M	0	0	2016-07-07	2016-07-07	false	Premolars	3.02813	Trep1	M	Premolar
833	15	2006-06-19	Group1	2006-06-19	2006-08-01	1	#NULL!	#NULL!	0	0		0	#NULL!	1	0	0	2016-09-17	23	M	0	0	2016-09-17	2016-09-17	false	Premolars	10.248	VitE	M	Premolar
833	24	2006-08-22	Group1	2006-08-22	2006-09-13	2	#NULL!	#NULL!	0	0		0	#NULL!	2	0	0	2016-09-17	23	M	0	0	2016-09-17	2016-09-17	false	Premolars	10.0728	VitE	M	Premolar
833	26	2006-09-18	Group1	2006-09-18	2006-10-25	1	#NULL!	#NULL!	0	0		0	#NULL!	3	0	0	2016-09-17	23	M	0	0	2016-09-17	2016-09-17	false	Molars	9.99885	VitE	M	Molar
833	17	2008-03-27	Group1	2008-04-14	2008-06-30	3	#NULL!	#NULL!	0	0		0	#NULL!	4	0	0	2016-09-17	25	M	0	0	2016-09-17	2016-09-17	false	Molars	8.47657	Trep1	M	Molar
833	36	2008-06-05	Group1	2008-06-05	2009-01-29	3	2011-12-22	2	retreatment	0		extracted	2012-08-03	5	0	0	2016-09-17	25	M	3	1	2012-08-03	2011-12-22	false	Molars	3.54559	VitE	M	Molar
833	27	2009-04-16	Group1	2009-04-16	2010-07-01	3	#NULL!	#NULL!	0	0		0	#NULL!	7	0	0	2016-09-17	26	M	0	0	2016-09-17	2016-09-17	false	Molars	7.42248	Trep1	M	Molar
834	12	2011-01-03	Group 2	2011-01-03	2011-01-03	0	#NULL!	#NULL!	0	0		0	#NULL!	0	0	4	2016-06-10	48	M	0	0	2016-06-10	2016-06-10	true	Anterior	5.43475	Trep1	M	Anterior
834	36	2011-06-01	Group 2	2011-06-01	2011-07-20	2	#NULL!	#NULL!	0	0		0	#NULL!	1	0	3	2016-06-10	48	M	0	0	2016-06-10	2016-06-10	false	Molars	5.0268	Trep1	M	Molar
834	24	2015-10-12	Group 3	2015-11-17	2015-11-17	1	#NULL!	#NULL!	0	0		0	#NULL!	3	0	3	2016-06-10	53	M	0	0	2016-06-10	2016-06-10	true	Premolars	0.662574	VitE	M	Premolar
835	46	2006-05-18	Group1	2006-05-18	2006-07-11	4	2012-07-31	2	retreatment	0		0	#NULL!	0	0	1	2015-05-18	33	W	1	1	2015-05-18	2012-07-31	false	Molars	6.20411	VitE	W	Molar
835	15	2006-06-01	Group1	2006-06-01	2006-07-11	3	#NULL!	#NULL!	0	0		0	#NULL!	1	0	1	2015-05-18	33	W	0	0	2015-05-18	2015-05-18	false	Premolars	8.96118	VitE	W	Premolar
835	16	2006-09-12	Group1	2006-09-12	2006-09-26	2	#NULL!	#NULL!	0	0		0	#NULL!	2	0	1	2015-05-18	34	W	0	0	2015-05-18	2015-05-18	false	Molars	8.67918	Trep1	W	Molar
835	36	2010-02-25	Group 2	2010-02-25	2010-04-15	3	#NULL!	#NULL!	0	0		0	#NULL!	4	0	1	2015-05-18	37	W	0	0	2015-05-18	2015-05-18	false	Molars	5.22393	VitE	W	Molar
835	37	2015-03-11	Group 3	2015-05-18	2015-05-18	1	#NULL!	#NULL!	0	0		0	#NULL!	8	0	0	2015-05-18	42	W	0	0	2015-05-18	2015-05-18	true	Molars	0.186178	Trep1	W	Molar
836	36	2012-02-14	Group 3	2012-02-14	2012-03-01	1	#NULL!	#NULL!	0	0		0	#NULL!	0	0	0	2012-03-01	14	M	0	0	2012-03-01	2012-03-01	false	Molars	0.0438066	VitE	M	Molar
837	43	2009-10-02	Group 2	2009-10-02	2009-11-19	2	#NULL!	#NULL!	0	0		0	#NULL!	0	0	0	2011-06-28	71	M	0	0	2011-06-28	2011-06-28	false	Anterior	1.73584	Trep1	M	Anterior
838	17	2007-05-22	Group1	2007-05-22	2007-07-31	1	#NULL!	#NULL!	0	0		extracted	2012-05-31	0	0	0	2016-05-18	55	M	3	1	2012-05-31	2012-05-31	false	Molars	5.0268	VitE	M	Molar
838	25	2007-06-11	Group1	2007-06-11	2007-07-12	1	2012-04-17	2	0	root end surgery	WR	0	#NULL!	1	0	2	2016-05-18	55	M	2	1	2016-05-18	2012-04-17	false	Premolars	4.85158	Trep1	M	Premolar
839	25	2014-09-17	Group 3	2014-09-17	2014-09-17	0	#NULL!	#NULL!	0	0		0	#NULL!	0	0	4	2016-09-15	74	M	0	0	2016-09-15	2016-09-15	true	Premolars	1.99594	Trep1	M	Premolar
840	26	2006-07-28	Group1	2006-08-28	2006-11-22	2	#NULL!	#NULL!	0	0		0	#NULL!	0	0	0	2006-12-13	23	W	0	0	2006-12-13	2006-12-13	false	Molars	0.377832	VitE	W	Molar
840	36	2006-10-09	Group1	2006-10-09	2006-12-13	3	#NULL!	#NULL!	0	0		0	#NULL!	1	0	0	2006-12-13	24	W	0	0	2006-12-13	2006-12-13	false	Molars	0.177964	Trep1	W	Molar
841	21	2006-09-05	Group1	2006-09-05	2007-03-06	3	#NULL!	#NULL!	0	0		0	#NULL!	0	0	0	2010-07-19	12	M	0	0	2010-07-19	2010-07-19	false	Anterior	3.86867	Trep1	M	Anterior
842	17	2006-06-14	Group1	2006-06-14	2006-07-05	2	#NULL!	#NULL!	0	0		0	#NULL!	0	0	0	2008-03-03	24	M	0	0	2008-03-03	2008-03-03	false	Molars	1.71941	VitE	M	Molar
843	12	2006-05-30	Group1	2006-05-30	2006-06-27	2	#NULL!	#NULL!	0	0		0	#NULL!	0	0	0	2006-08-29	25	W	0	0	2006-08-29	2006-08-29	false	Anterior	0.24915	Trep1	W	Anterior
844	22	2006-08-15	Group1	2006-08-15	2007-02-01	4	2007-02-06	1	0	root end surgery	WR	0	#NULL!	0	0	0	2008-10-07	40	W	2	1	2008-10-07	2007-02-06	false	Anterior	0.479134	Trep1	W	Anterior
845	23	2006-06-16	Group1	2006-06-16	2006-08-16	3	#NULL!	#NULL!	0	0		0	#NULL!	0	0	0	2006-09-13	58	W	0	0	2006-09-13	2006-09-13	false	Anterior	0.243674	Trep1	W	Anterior
846	26	2006-12-06	Group1	2006-12-06	2006-12-20	1	#NULL!	#NULL!	0	0		0	#NULL!	0	0	0	2006-12-20	53	W	0	0	2006-12-20	2006-12-20	false	Molars	0.0383308	Trep1	W	Molar
847	22	2008-04-28	Group1	2008-04-28	2008-05-15	1	#NULL!	#NULL!	0	0		0	#NULL!	0	0	0	2008-06-11	67	W	0	0	2008-06-11	2008-06-11	false	Anterior	0.120468	VitE	W	Anterior
848	27	2006-07-27	Group1	2006-09-11	2007-11-26	1	#NULL!	#NULL!	0	0		extracted	2006-09-19	0	0	0	2010-07-08	49	W	3	1	2006-09-19	2006-09-19	false	Molars	0.147847	VitE	W	Molar
849	35	2009-11-18	Group 2	2009-11-18	2010-01-28	2	#NULL!	#NULL!	0	0		0	#NULL!	0	0	0	2015-09-02	76	M	0	0	2015-09-02	2015-09-02	false	Premolars	5.78794	Trep1	M	Premolar
849	23	2012-02-13	Group 3	2012-02-13	2012-03-13	2	#NULL!	#NULL!	0	0		extracted	2014-07-02	1	0	1	2015-09-02	78	M	3	1	2014-07-02	2014-07-02	false	Anterior	2.38198	Trep1	M	Anterior
850	47	2009-12-17	Group 2	2010-02-10	2010-05-04	3	#NULL!	#NULL!	0	0		0	#NULL!	0	0	0	2010-06-14	28	M	0	0	2010-06-14	2010-06-14	false	Molars	0.490086	VitE	M	Molar
851	16	2006-10-10	Group1	2006-10-23	2007-01-25	2	#NULL!	#NULL!	0	0		0	#NULL!	2	0	0	2008-02-13	30	M	0	0	2008-02-13	2008-02-13	false	Molars	1.34431	Trep1	M	Molar
851	26	2006-11-20	Group1	2006-11-20	2007-02-22	3	#NULL!	#NULL!	0	0		0	#NULL!	3	0	0	2008-02-13	30	M	0	0	2008-02-13	2008-02-13	false	Molars	1.23206	VitE	M	Molar
852	47	2008-07-09	Group1	2008-07-09	2008-09-29	3	#NULL!	#NULL!	0	0		0	#NULL!	0	0	7	2016-09-06	53	M	0	0	2016-09-06	2016-09-06	false	Molars	8.16171	VitE	M	Molar
853	21	2014-12-15	Group 3	2014-12-15	2015-03-04	1	#NULL!	#NULL!	0	0		0	#NULL!	0	0	1	2016-07-26	53	W	0	0	2016-07-26	2016-07-26	false	Anterior	1.61263	VitE	W	Anterior
854	34	2013-04-17	Group 3	2013-04-17	2013-05-07	1	#NULL!	#NULL!	0	0		0	#NULL!	0	0	8	2016-08-30	44	W	0	0	2016-08-30	2016-08-30	false	Premolars	3.37037	Trep1	W	Premolar
854	26	2014-10-14	Group 3	2014-10-14	2014-11-26	1	#NULL!	#NULL!	0	0		0	#NULL!	1	0	4	2016-08-30	46	W	0	0	2016-08-30	2016-08-30	false	Molars	1.87821	Trep1	W	Molar
855	41	2006-08-29	Group1	2006-08-29	2006-10-23	2	#NULL!	#NULL!	0	0		0	#NULL!	0	0	1	2014-12-01	86	W	0	0	2014-12-01	2014-12-01	false	Anterior	8.25754	Trep1	W	Anterior
856	11	2006-06-26	Group1	2006-06-26	2006-07-11	1	#NULL!	#NULL!	0	0		0	#NULL!	0	0	0	2007-04-17	68	W	0	0	2007-04-17	2007-04-17	false	Anterior	0.807684	VitE	W	Anterior
857	25	2014-02-17	Group 3	2014-02-17	2014-02-17	0	#NULL!	#NULL!	0	0		0	#NULL!	0	0	0	2016-05-17	69	W	0	0	2016-05-17	2016-05-17	true	Premolars	2.24509	Trep1	W	Premolar
858	46	2008-09-04	Group1	2008-09-04	2008-10-06	3	2012-08-14	2	retreatment	0		0	#NULL!	2	0	1	2012-09-03	27	W	1	1	2012-09-03	2012-08-14	false	Molars	3.94259	VitE	W	Molar
858	15	2010-09-02	Group 2	2010-09-02	2010-11-08	3	#NULL!	#NULL!	0	0		0	#NULL!	3	0	1	2012-09-03	29	W	0	0	2012-09-03	2012-09-03	false	Premolars	2.00415	VitE	W	Premolar
859	25	2006-07-05	Group1	2006-07-05	2006-08-07	1	#NULL!	#NULL!	0	0		0	#NULL!	0	0	0	2016-07-19	27	M	0	0	2016-07-19	2016-07-19	false	Premolars	10.0399	Trep1	M	Premolar
860	25	2009-11-25	Group 2	2009-11-25	2010-05-12	4	#NULL!	#NULL!	0	0		0	#NULL!	0	0	0	2010-07-13	45	M	0	0	2010-07-13	2010-07-13	false	Premolars	0.629719	Trep1	M	Premolar
861	25	2009-05-07	Group 2	2009-05-07	2009-06-08	1	#NULL!	#NULL!	0	0		0	#NULL!	0	0	0	2011-02-08	19	M	0	0	2011-02-08	2011-02-08	false	Premolars	1.75774	VitE	M	Premolar
862	47	2006-07-03	Group1	2006-07-03	2006-08-14	2	#NULL!	#NULL!	0	0		0	#NULL!	0	0	0	2015-07-22	65	W	0	0	2015-07-22	2015-07-22	false	Molars	9.05153	VitE	W	Molar
863	17	2010-09-14	Group 2	2010-09-14	2010-11-08	2	#NULL!	#NULL!	0	0		extracted	2011-02-22	0	0	0	2011-03-22	52	M	3	1	2011-02-22	2011-02-22	false	Molars	0.440804	VitE	M	Molar
864	12	2006-09-21	Group1	2006-09-21	2006-12-05	4	#NULL!	#NULL!	0	0		extracted	2007-01-09	0	0	0	2016-04-20	51	W	3	1	2007-01-09	2007-01-09	false	Anterior	0.30117	Trep1	W	Anterior
864	42	2007-04-25	Group1	2007-04-25	2007-06-05	2	#NULL!	#NULL!	0	0		0	#NULL!	1	0	0	2016-04-20	52	W	0	0	2016-04-20	2016-04-20	false	Anterior	8.98856	VitE	W	Anterior
864	45	2008-09-01	Group1	2008-09-01	2008-10-02	2	#NULL!	#NULL!	0	0		0	#NULL!	2	0	0	2016-04-20	53	W	0	0	2016-04-20	2016-04-20	false	Premolars	7.6333	VitE	W	Premolar
864	21	2008-09-25	Group1	2008-09-25	2009-01-26	4	#NULL!	#NULL!	0	0		extracted	2013-01-31	3	0	0	2016-04-20	53	W	3	1	2013-01-31	2013-01-31	false	Anterior	4.35054	VitE	W	Anterior
864	25	2009-04-23	Group 2	2009-04-23	2009-05-28	2	#NULL!	#NULL!	0	0		0	#NULL!	4	0	0	2016-04-20	54	W	0	0	2016-04-20	2016-04-20	false	Premolars	6.99262	VitE	W	Premolar
864	13	2012-09-27	Group 3	2012-09-27	2012-11-19	2	#NULL!	#NULL!	0	0		0	#NULL!	5	0	0	2016-04-20	57	W	0	0	2016-04-20	2016-04-20	false	Anterior	3.56202	VitE	W	Anterior
865	47	2011-05-11	Group 2	2011-05-11	2011-06-08	1	#NULL!	#NULL!	0	0		0	#NULL!	0	0	7	2016-09-19	50	W	0	0	2016-09-19	2016-09-19	false	Molars	5.36083	VitE	W	Molar
866	12	2004-08-20	Group1	2004-08-20	2004-08-24	1	#NULL!	#NULL!	0	0		0	#NULL!	0	0	0	2004-09-24	76	W	0	0	2004-09-24	2004-09-24	false	Anterior	0.0958269	Trep1	W	Anterior
867	45	2001-02-01	Group1	2001-02-01	2001-04-03	2	#NULL!	#NULL!	0	0		0	#NULL!	0	0	3	2016-04-20	60	M	0	0	2016-04-20	2016-04-20	false	Premolars	15.2146	VitE	M	Premolar
867	36	2006-12-14	Group1	2006-12-14	2007-04-05	1	#NULL!	#NULL!	0	0		0	#NULL!	2	0	3	2016-04-20	65	M	0	0	2016-04-20	2016-04-20	false	Molars	9.34997	Trep1	M	Molar
867	25	2013-08-26	Group 3	2013-08-26	2013-08-26	0	2013-12-11	1	0	root end surgery	WR	0	#NULL!	3	0	2	2016-04-20	72	M	2	1	2016-04-20	2013-12-11	true	Premolars	0.292956	Trep1	M	Premolar
868	46	2012-08-22	Group 3	2012-08-22	2012-10-10	2	#NULL!	#NULL!	0	0		0	#NULL!	0	0	1	2015-10-07	55	M	0	0	2015-10-07	2015-10-07	false	Molars	3.12396	VitE	M	Molar
869	15	2003-01-22	Group1	2003-01-22	2003-01-22	0	#NULL!	#NULL!	0	0		0	#NULL!	1	0	1	2015-03-12	67	W	0	0	2015-03-12	2015-03-12	true	Premolars	12.1344	VitE	W	Premolar
869	12	2003-06-04	Group1	2003-06-04	2003-07-10	2	#NULL!	#NULL!	0	0		0	#NULL!	2	2	2	2015-03-12	67	W	0	0	2015-03-12	2015-03-12	false	Anterior	11.7703	Trep1	W	Anterior
870	37	2008-10-06	Group1	2008-10-06	2008-11-20	2	2009-01-29	2	retreatment	0		0	#NULL!	0	0	0	2016-03-15	58	W	1	1	2016-03-15	2009-01-29	false	Molars	0.31486	VitE	W	Molar
871	37	2002-12-16	Group1	2002-12-16	2003-03-31	2	#NULL!	#NULL!	0	0		extracted	2012-07-10	0	0	2	2016-06-01	69	W	3	1	2012-07-10	2012-07-10	false	Molars	9.56626	VitE	W	Molar
872	25	2005-07-21	Group1	2005-07-21	2005-09-20	2	#NULL!	#NULL!	0	0		extracted	2007-01-08	1	0	0	2009-05-05	67	W	3	1	2007-01-08	2007-01-08	false	Premolars	1.46752	Trep1	W	Premolar
872	21	2005-10-04	Group1	2005-10-04	2005-11-22	2	#NULL!	#NULL!	0	0		0	#NULL!	2	0	0	2009-05-05	67	W	0	0	2009-05-05	2009-05-05	false	Anterior	3.58393	VitE	W	Anterior
873	47	2002-11-27	Group1	2002-11-27	2003-04-30	2	#NULL!	#NULL!	0	0		0	#NULL!	0	0	0	2004-07-26	35	W	0	0	2004-07-26	2004-07-26	false	Molars	1.66191	Trep1	W	Molar
873	26	2004-06-30	Group1	2004-06-30	2004-07-26	1	#NULL!	#NULL!	0	0		0	#NULL!	1	0	0	2004-07-26	37	W	0	0	2004-07-26	2004-07-26	false	Molars	0.0711857	VitE	W	Molar
874	33	2005-02-14	Group1	2005-02-14	2005-04-21	2	#NULL!	#NULL!	0	0		extracted	2009-10-20	0	0	0	2016-07-13	66	W	3	1	2009-10-20	2009-10-20	false	Anterior	4.67909	Trep1	W	Anterior
875	44	2001-11-21	Group1	2001-11-21	2001-11-21	0	#NULL!	#NULL!	0	0		0	#NULL!	0	0	6	2016-05-24	54	W	0	0	2016-05-24	2016-05-24	true	Premolars	14.5055	VitE	W	Premolar
875	45	2005-09-06	Group1	2005-09-06	2005-09-26	1	#NULL!	#NULL!	0	0		0	#NULL!	1	0	6	2016-05-24	58	W	0	0	2016-05-24	2016-05-24	false	Premolars	10.7134	Trep1	W	Premolar
875	11	2008-03-27	Group1	2008-03-27	2008-03-27	0	#NULL!	#NULL!	0	0		extracted	2010-07-27	2	0	0	2016-05-24	60	W	3	1	2010-07-27	2010-07-27	true	Anterior	2.3327	VitE	W	Anterior
875	34	2014-02-18	Group 3	2014-02-18	2014-02-18	0	#NULL!	#NULL!	0	0		0	#NULL!	3	0	3	2016-05-24	66	W	0	0	2016-05-24	2016-05-24	true	Premolars	2.26151	VitE	W	Premolar
876	31	2001-10-24	Group1	2001-10-24	2005-03-24	7	#NULL!	#NULL!	0	0		0	#NULL!	0	0	0	2006-06-21	23	W	0	0	2006-06-21	2006-06-21	false	Anterior	4.65719	Trep1	W	Anterior
877	22	1999-08-19	Group1	1999-08-19	1999-10-13	2	2000-05-02	2	retreatment	0		extracted	2004-09-28	0	0	0	2014-11-25	61	M	3	1	2004-09-28	2000-05-02	false	Anterior	0.703643	Trep1	M	Anterior
877	23	2001-10-09	Group1	2001-10-09	2001-10-23	1	#NULL!	#NULL!	0	0		extracted	2004-09-28	2	0	0	2014-11-25	63	M	3	1	2004-09-28	2004-09-28	false	Anterior	2.97063	VitE	M	Anterior
878	38	2007-10-01	Group1	2007-10-01	2007-10-11	1	#NULL!	#NULL!	0	0		0	#NULL!	0	0	0	2016-09-21	66	M	0	0	2016-09-21	2016-09-21	false	Molars	8.97487	VitE	M	Molar
879	34	2002-03-11	Group1	2002-03-11	2002-04-23	3	#NULL!	#NULL!	0	0		0	#NULL!	0	0	0	2009-07-28	64	W	0	0	2009-07-28	2009-07-28	false	Premolars	7.38141	Trep1	W	Premolar
880	32	2009-09-02	Group 2	2009-09-02	2009-09-24	1	#NULL!	#NULL!	0	0		0	#NULL!	0	0	1	2015-05-27	74	W	0	0	2015-05-27	2015-05-27	false	Anterior	5.73045	VitE	W	Anterior
881	44	2002-12-18	Group1	2002-12-18	2003-03-18	3	2005-04-11	1	0	root end surgery	WR	extracted	2012-05-29	0	0	7	2016-04-27	62	W	3	1	2012-05-29	2005-04-11	false	Premolars	2.31353	Trep1	W	Premolar
881	27	2004-05-10	Group1	2004-06-07	2004-11-09	3	#NULL!	#NULL!	0	0		extracted	2005-05-02	2	1	0	2016-04-27	64	W	3	1	2005-05-02	2005-05-02	false	Molars	0.977434	VitE	W	Molar
881	15	2005-06-07	Group1	2005-06-07	2005-06-07	0	2009-09-03	2	retreatment	0		extracted	2011-05-19	3	1	6	2016-04-27	65	W	3	1	2011-05-19	2009-09-03	true	Premolars	4.24102	Trep1	W	Premolar
881	36	2010-03-23	Group 2	2010-03-23	2010-04-26	1	#NULL!	#NULL!	0	0		0	#NULL!	6	1	7	2016-04-27	70	W	0	0	2016-04-27	2016-04-27	false	Molars	6.09733	Trep1	W	Molar
882	44	2001-08-16	Group1	2001-08-16	2001-10-04	1	#NULL!	#NULL!	0	0		0	#NULL!	0	0	4	2015-07-09	41	W	0	0	2015-07-09	2015-07-09	false	Premolars	13.8949	Trep1	W	Premolar
883	15	2003-07-22	Group1	2003-07-22	2004-03-16	8	#NULL!	#NULL!	0	0		0	#NULL!	0	0	0	2011-10-04	61	W	0	0	2011-10-04	2011-10-04	false	Premolars	8.20278	Trep1	W	Premolar
883	35	2005-05-17	Group1	2005-05-17	2005-05-31	1	#NULL!	#NULL!	0	0		extracted	2008-11-04	1	0	0	2011-10-04	63	W	3	1	2008-11-04	2008-11-04	false	Premolars	3.46893	VitE	W	Premolar
884	24	2007-04-05	Group1	2007-04-05	2007-04-26	1	#NULL!	#NULL!	0	0		0	#NULL!	0	0	14	2016-06-20	65	W	0	0	2016-06-20	2016-06-20	false	Premolars	9.21033	Trep1	W	Premolar
885	15	2006-07-10	Group1	2006-07-10	2006-11-08	4	#NULL!	#NULL!	0	0		0	#NULL!	0	0	0	2006-11-23	51	W	0	0	2006-11-23	2006-11-23	false	Premolars	0.372356	Trep1	W	Premolar
885	14	2006-07-10	Group1	2006-07-10	2006-11-08	3	#NULL!	#NULL!	0	0		0	#NULL!	0	0	0	2006-11-23	51	W	0	0	2006-11-23	2006-11-23	false	Premolars	0.372356	Trep1	W	Premolar
885	17	2006-08-08	Group1	2006-08-08	2006-10-25	6	#NULL!	#NULL!	0	0		0	#NULL!	2	0	0	2006-11-23	51	W	0	0	2006-11-23	2006-11-23	false	Molars	0.292956	VitE	W	Molar
886	26	2006-12-07	Group1	2006-12-07	2007-01-08	1	#NULL!	#NULL!	0	0		extracted	2010-02-25	1	0	2	2016-09-07	63	W	3	1	2010-02-25	2010-02-25	false	Molars	3.21978	VitE	W	Molar
887	21	2003-05-13	Group1	2003-05-13	2003-05-13	0	#NULL!	#NULL!	0	0		0	#NULL!	0	0	0	2010-06-07	52	W	0	0	2010-06-07	2010-06-07	true	Anterior	7.06929	VitE	W	Anterior
887	12	2007-07-05	Group1	2007-07-05	2007-08-02	1	#NULL!	#NULL!	0	0		0	#NULL!	1	0	0	2010-06-07	57	W	0	0	2010-06-07	2010-06-07	false	Anterior	2.92409	Trep1	W	Anterior
888	16	2014-10-16	Group 3	2014-10-16	2014-10-16	0	#NULL!	#NULL!	0	0		0	#NULL!	0	0	3	2016-08-10	56	W	0	0	2016-08-10	2016-08-10	true	Molars	1.81797	VitE	W	Molar
889	23	2015-06-01	Group 3	2015-06-01	2015-06-18	1	#NULL!	#NULL!	0	0		0	#NULL!	0	0	4	2016-08-25	60	W	0	0	2016-08-25	2016-08-25	false	Anterior	1.2348	Trep1	W	Anterior
890	25	2002-12-16	Group1	2002-12-16	2003-01-08	1	#NULL!	#NULL!	0	0		extracted	2004-11-02	0	0	0	2010-04-12	32	M	3	1	2004-11-02	2004-11-02	false	Premolars	1.88094	VitE	M	Premolar
891	46	2006-08-01	Group1	2006-08-01	2006-09-07	3	#NULL!	#NULL!	0	0		0	#NULL!	0	0	0	2007-12-12	57	W	0	0	2007-12-12	2007-12-12	false	Molars	1.36348	Trep1	W	Molar
892	22	2006-08-15	Group1	2006-08-15	2006-08-29	1	#NULL!	#NULL!	0	0		0	#NULL!	0	0	0	2007-12-13	63	M	0	0	2007-12-13	2007-12-13	false	Anterior	1.32789	Trep1	M	Anterior
892	12	2006-10-17	Group1	2006-10-17	2006-10-17	0	#NULL!	#NULL!	0	0		0	#NULL!	1	0	0	2007-12-13	63	M	0	0	2007-12-13	2007-12-13	true	Anterior	1.1554	VitE	M	Anterior
892	21	2006-11-23	Group1	2006-11-23	2006-11-23	0	#NULL!	#NULL!	0	0		0	#NULL!	2	0	0	2007-12-13	63	M	0	0	2007-12-13	2007-12-13	true	Anterior	1.0541	VitE	M	Anterior
892	47	2007-10-31	Group1	2007-10-31	2007-11-29	2	#NULL!	#NULL!	0	0		0	#NULL!	3	0	0	2007-12-13	64	M	0	0	2007-12-13	2007-12-13	false	Molars	0.11773	VitE	M	Molar
893	17	2002-05-23	Group1	2002-05-23	2002-08-06	2	#NULL!	#NULL!	0	0		extracted	2004-04-01	0	0	0	2005-05-03	80	M	3	1	2004-04-01	2004-04-01	false	Molars	1.85904	VitE	M	Molar
893	44	2002-09-09	Group1	2002-09-09	2002-09-09	0	2002-09-11	1	retreatment	0		extracted	2002-09-17	1	0	0	2005-05-03	80	M	3	1	2002-09-17	2002-09-11	true	Premolars	0.00547582	Trep1	M	Premolar
893	35	2003-10-30	Group1	2003-10-30	2003-10-30	0	#NULL!	#NULL!	0	0		0	#NULL!	3	0	0	2005-05-03	81	M	0	0	2005-05-03	2005-05-03	true	Premolars	1.50859	VitE	M	Premolar
893	23	2005-02-24	Group1	2005-02-24	2005-03-10	1	#NULL!	#NULL!	0	0		0	#NULL!	4	0	0	2005-05-03	82	M	0	0	2005-05-03	2005-05-03	false	Anterior	0.186178	VitE	M	Anterior
894	32	2000-12-19	Group1	2000-12-19	2001-02-20	1	#NULL!	#NULL!	0	0		extracted	2008-07-09	0	0	0	2010-02-17	75	M	3	1	2008-07-09	2008-07-09	false	Anterior	7.5539	Trep1	M	Anterior
894	44	2002-03-04	Group1	2002-03-04	2002-03-21	2	#NULL!	#NULL!	0	0		extracted	2007-08-29	1	0	0	2010-02-17	76	M	3	1	2007-08-29	2007-08-29	false	Premolars	5.48677	Trep1	M	Premolar
894	33	2006-06-19	Group1	2006-06-19	2006-06-19	0	#NULL!	#NULL!	0	0		extracted	2008-02-22	2	0	0	2010-02-17	80	M	3	1	2008-02-22	2008-02-22	true	Anterior	1.67834	VitE	M	Anterior
895	17	2010-03-09	Group 2	2010-03-09	2010-04-13	1	#NULL!	#NULL!	0	0		extracted	2015-03-05	0	0	2	2015-12-02	47	M	3	1	2015-03-05	2015-03-05	false	Molars	4.98847	Trep1	M	Molar
896	13	2002-04-09	Group1	2002-04-09	2002-04-23	1	#NULL!	#NULL!	0	0		extracted	2009-08-06	0	0	0	2014-10-22	73	W	3	1	2009-08-06	2009-08-06	false	Anterior	7.32665	VitE	W	Anterior
896	23	2007-03-28	Group1	2007-03-28	2007-05-22	4	#NULL!	#NULL!	0	0		extracted	2009-07-07	1	0	0	2014-10-22	78	W	3	1	2009-07-07	2009-07-07	false	Anterior	2.27794	Trep1	W	Anterior
896	44	2010-04-28	Group 2	2010-04-28	2010-06-07	2	#NULL!	#NULL!	0	0		extracted	2011-04-11	3	0	0	2014-10-22	81	W	3	1	2011-04-11	2011-04-11	false	Premolars	0.952793	VitE	W	Premolar
896	22	2011-07-27	Group 2	2011-07-27	2011-08-29	2	#NULL!	#NULL!	0	0		extracted	2013-08-21	4	0	0	2014-10-22	82	W	3	1	2013-08-21	2013-08-21	false	Anterior	2.06986	VitE	W	Anterior
897	33	2009-05-11	Group 2	2009-05-11	2009-06-24	2	#NULL!	#NULL!	0	0		0	#NULL!	0	0	8	2016-06-14	44	W	0	0	2016-06-14	2016-06-14	false	Anterior	7.09393	Trep1	W	Anterior
897	25	2015-11-23	Group 3	2015-11-23	2015-11-23	0	#NULL!	#NULL!	0	0		0	#NULL!	2	0	1	2016-06-14	50	W	0	0	2016-06-14	2016-06-14	true	Premolars	0.558534	Trep1	W	Premolar
898	36	2009-12-03	Group 2	2009-12-03	2010-01-13	2	#NULL!	#NULL!	0	0		0	#NULL!	0	0	9	2016-09-26	47	W	0	0	2016-09-26	2016-09-26	false	Molars	6.81466	VitE	W	Molar
899	44	2008-05-14	Group1	2008-06-03	2008-06-17	1	2014-05-22	2	retreatment	0		0	#NULL!	0	0	15	2016-07-04	55	M	1	1	2016-07-04	2014-05-22	false	Premolars	6.02067	VitE	M	Premolar
899	14	2012-04-26	Group 3	2012-04-26	2012-05-22	1	#NULL!	#NULL!	0	0		extracted	2016-06-27	1	0	13	2016-07-04	59	M	3	1	2016-06-27	2016-06-27	false	Premolars	4.16984	VitE	M	Premolar
900	47	2007-06-04	Group1	2007-06-04	2007-07-30	4	#NULL!	#NULL!	0	0		extracted	2011-08-01	1	0	0	2011-11-17	43	W	3	1	2011-08-01	2011-08-01	false	Molars	4.15889	VitE	W	Molar
901	36	1999-07-26	Group1	1999-07-26	1999-09-13	1	#NULL!	#NULL!	0	0		extracted	2011-03-17	0	0	7	2016-09-15	61	W	3	1	2011-03-17	2011-03-17	false	Molars	11.6416	VitE	W	Molar
901	14	2000-01-19	Group1	2000-01-19	2000-01-19	0	#NULL!	#NULL!	0	0		extracted	2011-08-30	1	0	8	2016-09-15	61	W	3	1	2011-08-30	2011-08-30	true	Premolars	11.6115	VitE	W	Premolar
901	34	2001-06-25	Group1	2001-06-25	2001-07-11	1	#NULL!	#NULL!	0	0		0	#NULL!	2	0	8	2016-09-15	62	W	0	0	2016-09-15	2016-09-15	false	Premolars	15.2255	Trep1	W	Premolar
901	33	2001-08-08	Group1	2001-08-08	2001-08-14	1	#NULL!	#NULL!	0	0		0	#NULL!	3	0	8	2016-09-15	63	W	0	0	2016-09-15	2016-09-15	false	Anterior	15.1051	Trep1	W	Anterior
901	12	2013-09-12	Group 3	2013-09-12	2013-09-12	0	#NULL!	#NULL!	0	0		extracted	2014-03-24	4	0	4	2016-09-15	75	W	3	1	2014-03-24	2014-03-24	true	Anterior	0.528417	Trep1	W	Anterior
902	25	2000-01-24	Group1	2000-01-24	2000-05-08	2	#NULL!	#NULL!	0	0		0	#NULL!	0	0	0	2016-09-05	63	M	0	0	2016-09-05	2016-09-05	false	Premolars	16.6164	Trep1	M	Premolar
903	14	2003-03-17	Group1	2003-03-17	2003-05-12	4	#NULL!	#NULL!	0	0		0	#NULL!	0	0	14	2016-08-10	63	W	0	0	2016-08-10	2016-08-10	false	Premolars	13.4021	Trep1	W	Premolar
903	35	2004-03-11	Group1	2004-03-11	2004-03-23	1	#NULL!	#NULL!	0	0		0	#NULL!	2	0	14	2016-08-10	64	W	0	0	2016-08-10	2016-08-10	false	Premolars	12.4164	Trep1	W	Premolar
903	16	2004-04-27	Group1	2004-04-27	2004-07-12	3	#NULL!	#NULL!	0	0		extracted	2008-11-17	3	0	0	2016-08-10	64	W	3	1	2008-11-17	2008-11-17	false	Molars	4.55862	Trep1	W	Molar
903	11	2009-04-06	Group 2	2009-04-06	2009-05-04	1	#NULL!	#NULL!	0	0		0	#NULL!	4	0	14	2016-08-10	69	W	0	0	2016-08-10	2016-08-10	false	Anterior	7.34581	Trep1	W	Anterior
903	23	2009-04-27	Group 2	2009-04-27	2009-05-04	1	#NULL!	#NULL!	0	0		0	#NULL!	5	0	14	2016-08-10	69	W	0	0	2016-08-10	2016-08-10	false	Anterior	7.28832	Trep1	W	Anterior
904	16	2000-02-28	Group1	2000-02-28	2000-03-17	2	#NULL!	#NULL!	0	0		0	#NULL!	0	0	0	2004-07-29	33	W	0	0	2004-07-29	2004-07-29	false	Molars	4.41625	VitE	W	Molar
905	37	2004-02-16	Group1	2004-02-16	2004-03-16	1	#NULL!	#NULL!	0	0		0	#NULL!	0	0	0	2012-04-04	33	W	0	0	2012-04-04	2012-04-04	false	Molars	8.13159	VitE	W	Molar
906	34	2009-03-11	Group 2	2009-03-11	2009-03-11	0	#NULL!	#NULL!	0	0		0	#NULL!	3	0	0	2010-05-26	67	M	0	0	2010-05-26	2010-05-26	true	Premolars	1.20742	VitE	M	Premolar
906	14	2009-09-04	Group 2	2009-09-04	2010-02-03	1	#NULL!	#NULL!	0	0		0	#NULL!	4	0	0	2010-05-26	68	M	0	0	2010-05-26	2010-05-26	false	Premolars	0.722808	Trep1	M	Premolar
907	12	2001-02-07	Group1	2001-02-07	2001-02-19	1	#NULL!	#NULL!	0	0		0	#NULL!	0	0	0	2015-10-29	72	W	0	0	2015-10-29	2015-10-29	false	Anterior	14.7217	Trep1	W	Anterior
907	13	2014-01-09	Group 3	2014-01-09	2014-01-28	1	#NULL!	#NULL!	0	0		extracted	2015-09-17	1	0	0	2015-10-29	85	W	3	1	2015-09-17	2015-09-17	false	Anterior	1.68655	Trep1	W	Anterior
908	44	1999-08-12	Group1	1999-08-12	1999-08-12	0	#NULL!	#NULL!	0	0		0	#NULL!	0	0	0	2008-12-05	64	M	0	0	2008-12-05	2008-12-05	true	Premolars	9.31711	VitE	M	Premolar
908	34	2000-11-22	Group1	2000-11-22	2000-11-22	0	#NULL!	#NULL!	0	0		extracted	2002-01-23	1	0	0	2008-12-05	65	M	3	1	2002-01-23	2002-01-23	true	Premolars	1.16909	VitE	M	Premolar
909	14	2003-04-04	Group1	2003-04-04	2003-09-04	5	#NULL!	#NULL!	0	0		0	#NULL!	0	0	0	2008-11-11	48	M	0	0	2008-11-11	2008-11-11	false	Premolars	5.60724	Trep1	M	Premolar
909	24	2004-03-30	Group1	2004-05-11	2004-07-29	2	#NULL!	#NULL!	0	0		0	#NULL!	1	0	0	2008-11-11	49	M	0	0	2008-11-11	2008-11-11	false	Premolars	4.61886	Trep1	M	Premolar
910	12	2001-10-24	Group1	2001-10-24	2002-04-02	7	#NULL!	#NULL!	0	0		extracted	2005-05-31	0	0	0	2016-05-31	60	W	3	1	2005-05-31	2005-05-31	false	Anterior	3.60035	Trep1	W	Anterior
910	13	2003-09-09	Group1	2003-09-09	2003-10-21	3	#NULL!	#NULL!	0	0		extracted	2006-11-13	2	0	0	2016-05-31	62	W	3	1	2006-11-13	2006-11-13	false	Anterior	3.17871	Trep1	W	Anterior
911	15	2003-07-25	Group1	2003-07-25	2003-11-04	2	#NULL!	#NULL!	0	0		0	#NULL!	0	0	0	2007-05-15	42	M	0	0	2007-05-15	2007-05-15	false	Premolars	3.8057	VitE	M	Premolar
911	34	2004-09-28	Group1	2004-09-28	2004-12-14	2	#NULL!	#NULL!	0	0		0	#NULL!	5	0	0	2007-05-15	43	M	0	0	2007-05-15	2007-05-15	false	Premolars	2.62566	VitE	M	Premolar
911	14	2004-11-25	Group1	2004-11-25	2005-04-26	2	#NULL!	#NULL!	0	0		0	#NULL!	6	0	0	2007-05-15	43	M	0	0	2007-05-15	2007-05-15	false	Premolars	2.46686	VitE	M	Premolar
911	45	2005-02-28	Group1	2005-02-28	2005-03-16	1	#NULL!	#NULL!	0	0		0	#NULL!	7	0	0	2007-05-15	43	M	0	0	2007-05-15	2007-05-15	false	Premolars	2.20676	Trep1	M	Premolar
911	43	2005-03-23	Group1	2005-03-23	2005-04-07	1	#NULL!	#NULL!	0	0		0	#NULL!	8	0	0	2007-05-15	43	M	0	0	2007-05-15	2007-05-15	false	Anterior	2.14378	VitE	M	Anterior
911	44	2005-07-07	Group1	2005-07-07	2005-07-07	0	#NULL!	#NULL!	0	0		0	#NULL!	10	0	0	2007-05-15	44	M	0	0	2007-05-15	2007-05-15	true	Premolars	1.85357	VitE	M	Premolar
912	17	2001-07-05	Group1	2001-08-15	2001-08-27	1	#NULL!	#NULL!	0	0		extracted	2011-06-20	0	0	0	2014-12-11	74	M	3	1	2011-06-20	2011-06-20	false	Molars	9.95778	Trep1	M	Molar
912	45	2003-04-10	Group1	2003-04-10	2003-05-27	2	#NULL!	#NULL!	0	0		extracted	2007-08-02	2	0	0	2014-12-11	76	M	3	1	2007-08-02	2007-08-02	false	Premolars	4.31221	Trep1	M	Premolar
912	21	2011-06-20	Group 2	2011-06-20	2011-06-27	1	#NULL!	#NULL!	0	0		extracted	2013-04-25	3	0	0	2014-12-11	84	M	3	1	2013-04-25	2013-04-25	false	Anterior	1.84809	VitE	M	Anterior
912	11	2011-09-29	Group 2	2011-09-29	2011-10-13	1	#NULL!	#NULL!	0	0		extracted	2012-03-22	4	0	0	2014-12-11	84	M	3	1	2012-03-22	2012-03-22	false	Anterior	0.479134	Trep1	M	Anterior
913	17	2001-03-30	Group1	2001-03-30	2001-05-08	2	#NULL!	#NULL!	0	0		0	#NULL!	0	0	7	2016-06-09	52	M	0	0	2016-06-09	2016-06-09	false	Molars	15.1954	VitE	M	Molar
913	24	2012-07-09	Group 3	2012-07-09	2012-08-30	1	#NULL!	#NULL!	0	0		0	#NULL!	2	0	6	2016-06-09	63	M	0	0	2016-06-09	2016-06-09	false	Premolars	3.91795	Trep1	M	Premolar
913	15	2014-11-25	Group 3	2014-11-25	2014-12-11	2	#NULL!	#NULL!	0	0		extracted	2016-06-02	3	0	3	2016-06-09	66	M	3	1	2016-06-02	2016-06-02	false	Premolars	1.51954	Trep1	M	Premolar
914	34	2000-07-26	Group1	2000-07-26	2000-09-26	2	#NULL!	#NULL!	0	0		0	#NULL!	0	0	8	2016-02-18	56	M	0	0	2016-02-18	2016-02-18	false	Premolars	15.565	VitE	M	Premolar
915	15	2003-07-31	Group1	2003-07-31	2004-06-28	9	#NULL!	#NULL!	0	0		0	#NULL!	0	0	2	2016-04-11	43	M	0	0	2016-04-11	2016-04-11	false	Premolars	12.6984	Trep1	M	Premolar
915	44	2006-01-16	Group1	2006-01-16	2006-01-30	1	#NULL!	#NULL!	0	0		0	#NULL!	3	0	2	2016-04-11	45	M	0	0	2016-04-11	2016-04-11	false	Premolars	10.2343	Trep1	M	Premolar
916	17	2004-08-04	Group1	2004-08-04	2004-08-04	0	#NULL!	#NULL!	0	0		0	#NULL!	0	0	0	2013-04-23	47	M	0	0	2013-04-23	2013-04-23	true	Molars	8.71751	VitE	M	Molar
916	27	2010-05-04	Group 2	2010-05-04	2010-05-04	0	2012-05-10	3	0	root end surgery	WR	0	#NULL!	1	0	2	2013-04-23	52	M	2	1	2013-04-23	2012-05-10	true	Molars	2.01784	VitE	M	Molar
917	34	2011-02-02	Group 2	2011-02-02	2011-03-02	1	#NULL!	#NULL!	0	0		0	#NULL!	0	0	2	2015-07-27	67	M	0	0	2015-07-27	2015-07-27	false	Premolars	4.47922	Trep1	M	Premolar
917	45	2011-02-16	Group 2	2011-02-16	2011-02-16	0	#NULL!	#NULL!	0	0		extracted	2013-03-06	1	0	1	2015-07-27	67	M	3	1	2013-03-06	2013-03-06	true	Premolars	2.0507	VitE	M	Premolar
917	35	2011-04-26	Group 2	2011-04-26	2011-04-26	0	#NULL!	#NULL!	0	0		extracted	2015-07-27	3	0	2	2015-07-27	67	M	3	1	2015-07-27	2015-07-27	true	Premolars	4.25198	Trep1	M	Premolar
918	25	2000-03-21	Group1	2000-03-21	2000-03-21	0	#NULL!	#NULL!	0	0		extracted	2011-04-12	0	0	0	2016-05-30	68	W	3	1	2011-04-12	2011-04-12	true	Premolars	11.0584	VitE	W	Premolar
918	32	2013-05-23	Group 3	2013-05-23	2013-05-23	0	#NULL!	#NULL!	0	0		extracted	2015-01-19	1	0	4	2016-05-30	81	W	3	1	2015-01-19	2015-01-19	true	Anterior	1.65917	Trep1	W	Anterior
918	15	2013-05-29	Group 3	2013-06-03	2013-06-03	0	#NULL!	#NULL!	0	0		0	#NULL!	2	0	5	2016-05-30	81	W	0	0	2016-05-30	2016-05-30	true	Premolars	3.00349	Trep1	W	Premolar
918	14	2013-05-29	Group 3	2013-06-03	2013-06-03	0	#NULL!	#NULL!	0	0		0	#NULL!	2	0	5	2016-05-30	81	W	0	0	2016-05-30	2016-05-30	true	Premolars	3.00349	Trep1	W	Premolar
919	36	2003-01-09	Group1	2003-01-09	2003-02-03	2	#NULL!	#NULL!	0	0		extracted	2007-11-19	0	0	9	2016-09-19	65	M	3	1	2007-11-19	2007-11-19	false	Molars	4.85979	Trep1	M	Molar
919	33	2004-03-12	Group1	2004-03-12	2004-05-12	2	#NULL!	#NULL!	0	0		0	#NULL!	1	0	9	2016-09-19	66	M	0	0	2016-09-19	2016-09-19	false	Anterior	12.5232	Trep1	M	Anterior
919	23	2010-04-19	Group 2	2010-04-19	2010-08-10	1	#NULL!	#NULL!	0	0		extracted	2014-07-09	2	0	4	2016-09-19	72	M	3	1	2014-07-09	2014-07-09	false	Anterior	4.22186	Trep1	M	Anterior
920	43	2001-08-20	Group1	2001-08-20	2001-09-05	1	#NULL!	#NULL!	0	0		0	#NULL!	0	0	6	2016-04-21	59	W	0	0	2016-04-21	2016-04-21	false	Anterior	14.6697	Trep1	W	Anterior
920	22	2013-07-15	Group 3	2013-07-15	2013-07-15	0	#NULL!	#NULL!	0	0		extracted	2015-02-02	1	0	1	2016-04-21	71	W	3	1	2015-02-02	2015-02-02	true	Anterior	1.5524	Trep1	W	Anterior
920	12	2013-07-15	Group 3	2013-07-15	2013-07-15	0	#NULL!	#NULL!	0	0		0	#NULL!	1	0	4	2016-04-21	71	W	0	0	2016-04-21	2016-04-21	true	Anterior	2.76803	Trep1	W	Anterior
920	42	2013-07-23	Group 3	2013-07-23	2013-07-23	0	#NULL!	#NULL!	0	0		0	#NULL!	3	0	4	2016-04-21	71	W	0	0	2016-04-21	2016-04-21	true	Anterior	2.74612	Trep1	W	Anterior
920	32	2013-07-23	Group 3	2013-07-23	2013-07-23	0	#NULL!	#NULL!	0	0		0	#NULL!	3	0	4	2016-04-21	71	W	0	0	2016-04-21	2016-04-21	true	Anterior	2.74612	Trep1	W	Anterior
920	13	2015-11-26	Group 3	2015-11-26	2015-11-26	0	#NULL!	#NULL!	0	0		0	#NULL!	5	0	1	2016-04-21	74	W	0	0	2016-04-21	2016-04-21	true	Anterior	0.402473	Trep1	W	Anterior
921	33	2002-11-19	Group1	2002-11-19	2003-01-23	3	#NULL!	#NULL!	0	0		extracted	2005-06-07	0	0	0	2005-07-12	79	W	3	1	2005-06-07	2005-06-07	false	Anterior	2.54899	Trep1	W	Anterior
921	34	2002-11-19	Group1	2002-11-19	2003-01-23	3	#NULL!	#NULL!	0	0		0	#NULL!	0	0	0	2005-07-12	79	W	0	0	2005-07-12	2005-07-12	false	Premolars	2.64482	Trep1	W	Premolar
922	17	2000-01-11	Group1	2000-01-11	2000-01-11	0	#NULL!	#NULL!	0	0		0	#NULL!	0	0	5	2016-03-30	55	M	0	0	2016-03-30	2016-03-30	true	Molars	16.2166	VitE	M	Molar
923	24	2000-08-14	Group1	2000-08-14	2000-10-12	2	#NULL!	#NULL!	0	0		0	#NULL!	0	0	0	2009-12-11	73	M	0	0	2009-12-11	2009-12-11	false	Premolars	9.32532	Trep1	M	Premolar
923	22	2005-08-22	Group1	2005-08-22	2005-10-19	1	#NULL!	#NULL!	0	0		extracted	2006-09-27	1	0	0	2009-12-11	78	M	3	1	2006-09-27	2006-09-27	false	Anterior	1.0979	VitE	M	Anterior
923	23	2006-01-13	Group1	2006-01-13	2006-04-12	3	#NULL!	#NULL!	0	0		0	#NULL!	2	0	0	2009-12-11	79	M	0	0	2009-12-11	2009-12-11	false	Anterior	3.90974	Trep1	M	Anterior
924	17	2000-08-23	Group1	2000-08-23	2000-11-08	4	#NULL!	#NULL!	0	0		extracted	2004-10-12	0	0	0	2011-03-23	63	W	3	1	2004-10-12	2004-10-12	false	Molars	4.13698	Trep1	W	Molar
925	15	2003-11-24	Group1	2003-11-24	2003-12-10	1	#NULL!	#NULL!	0	0		extracted	2010-03-22	2	0	1	2016-09-26	60	W	3	1	2010-03-22	2010-03-22	false	Premolars	6.32457	VitE	W	Premolar
925	14	2013-11-11	Group 3	2013-11-11	2013-11-11	0	#NULL!	#NULL!	0	0		extracted	2015-05-05	6	0	1	2016-09-26	70	W	3	1	2015-05-05	2015-05-05	true	Premolars	1.47847	VitE	W	Premolar
926	16	1999-05-17	Group1	1999-05-17	1999-06-23	1	#NULL!	#NULL!	0	0		extracted	2005-02-23	0	0	0	2012-01-31	66	M	3	1	2005-02-23	2005-02-23	false	Molars	5.77425	Trep1	M	Molar
926	24	1999-07-21	Group1	1999-07-21	1999-07-21	0	#NULL!	#NULL!	0	0		extracted	2012-01-31	1	0	0	2012-01-31	66	M	3	1	2012-01-31	2012-01-31	true	Premolars	12.5314	VitE	M	Premolar
926	25	1999-07-28	Group1	1999-07-28	1999-07-28	0	#NULL!	#NULL!	0	0		extracted	2011-11-29	2	0	0	2012-01-31	66	M	3	1	2011-11-29	2011-11-29	true	Premolars	12.3398	VitE	M	Premolar
926	44	2001-12-17	Group1	2001-12-17	2001-12-17	0	#NULL!	#NULL!	0	0		0	#NULL!	3	0	0	2012-01-31	68	M	0	0	2012-01-31	2012-01-31	true	Premolars	10.1221	VitE	M	Premolar
926	43	2011-03-22	Group 2	2011-03-22	2011-05-03	1	#NULL!	#NULL!	0	0		0	#NULL!	4	0	0	2012-01-31	77	M	0	0	2012-01-31	2012-01-31	false	Anterior	0.862442	Trep1	M	Anterior
927	22	2001-10-08	Group1	2001-10-08	2001-12-11	2	#NULL!	#NULL!	0	0		0	#NULL!	0	0	0	2009-03-24	38	W	0	0	2009-03-24	2009-03-24	false	Anterior	7.45807	VitE	W	Anterior
928	12	2011-06-07	Group 2	2011-06-07	2011-06-21	1	#NULL!	#NULL!	0	0		0	#NULL!	0	0	0	2011-06-21	67	M	0	0	2011-06-21	2011-06-21	false	Anterior	0.0383308	Trep1	M	Anterior
929	37	2004-08-26	Group1	2004-08-26	2004-09-06	1	#NULL!	#NULL!	0	0		0	#NULL!	0	0	0	2009-05-29	73	M	0	0	2009-05-29	2009-05-29	false	Molars	4.75575	VitE	M	Molar
930	47	2000-09-25	Group1	2000-09-25	2000-10-02	1	#NULL!	#NULL!	0	0		0	#NULL!	0	0	0	2003-09-18	61	W	0	0	2003-09-18	2003-09-18	false	Molars	2.97885	Trep1	W	Molar
931	33	2007-11-27	Group1	2007-11-27	2007-12-11	1	#NULL!	#NULL!	0	0		0	#NULL!	1	0	0	2011-08-31	87	W	0	0	2011-08-31	2011-08-31	false	Anterior	3.75915	VitE	W	Anterior
932	44	2003-02-03	Group1	2003-02-03	2003-02-18	2	#NULL!	#NULL!	0	0		extracted	2013-06-13	0	0	0	2014-11-10	75	W	3	1	2013-06-13	2013-06-13	false	Premolars	10.3575	Trep1	W	Premolar
932	33	2008-04-21	Group1	2008-04-21	2008-06-02	1	#NULL!	#NULL!	0	0		extracted	2013-06-13	1	0	0	2014-11-10	80	W	3	1	2013-06-13	2013-06-13	false	Anterior	5.14453	Trep1	W	Anterior
932	42	2009-01-26	Group1	2009-01-26	2009-03-12	1	#NULL!	#NULL!	0	0		0	#NULL!	2	0	0	2014-11-10	81	W	0	0	2014-11-10	2014-11-10	false	Anterior	5.78794	Trep1	W	Anterior
932	41	2009-04-29	Group1	2009-04-29	2009-07-01	2	#NULL!	#NULL!	0	0		0	#NULL!	3	0	0	2014-11-10	81	W	0	0	2014-11-10	2014-11-10	false	Anterior	5.53332	Trep1	W	Anterior
933	37	2010-02-03	Group 2	2010-02-03	2010-03-16	2	#NULL!	#NULL!	0	0		0	#NULL!	0	0	1	2012-07-16	51	M	0	0	2012-07-16	2012-07-16	false	Molars	2.44769	Trep1	M	Molar
934	27	2004-12-15	Group1	2004-12-15	2004-12-15	0	#NULL!	#NULL!	0	0		extracted	2010-10-27	3	0	0	2011-04-26	56	W	3	1	2010-10-27	2010-10-27	true	Molars	5.8646	VitE	W	Molar
934	36	2005-06-29	Group1	2005-06-29	2005-07-27	1	#NULL!	#NULL!	0	0		extracted	2010-10-27	4	0	0	2011-04-26	57	W	3	1	2010-10-27	2010-10-27	false	Molars	5.32797	VitE	W	Molar
934	46	2005-11-16	Group1	2005-11-16	2005-11-16	0	#NULL!	#NULL!	0	0		0	#NULL!	5	0	0	2011-04-26	57	W	0	0	2011-04-26	2011-04-26	true	Molars	5.44023	VitE	W	Molar
935	37	2004-06-08	Group1	2004-06-08	2004-08-03	2	#NULL!	#NULL!	0	0		0	#NULL!	0	0	8	2016-09-07	65	W	0	0	2016-09-07	2016-09-07	false	Molars	12.2494	Trep1	W	Molar
935	22	2009-01-15	Group 2	2009-01-15	2009-02-19	2	#NULL!	#NULL!	0	0		0	#NULL!	1	0	8	2016-09-07	69	W	0	0	2016-09-07	2016-09-07	false	Anterior	7.64425	Trep1	W	Anterior
936	25	2006-03-09	Group1	2006-03-09	2006-04-26	1	#NULL!	#NULL!	0	0		extracted	2006-08-22	0	0	21	2016-09-05	61	W	3	1	2006-08-22	2006-08-22	false	Premolars	0.454493	Trep1	W	Premolar
937	47	2004-02-10	Group1	#NULL!	2004-07-26	5	#NULL!	#NULL!	0	0		0	#NULL!	0	0	0	2009-11-09	68	M	0	0	2009-11-09	2009-11-09	false	Molars	5.74687	Trep1	M	Molar
938	45	1999-08-30	Group1	1999-08-30	1999-09-23	2	#NULL!	#NULL!	0	0		0	#NULL!	0	0	0	2006-02-03	54	W	0	0	2006-02-03	2006-02-03	false	Premolars	6.43135	VitE	W	Premolar
939	35	2013-11-14	Group 3	2013-11-14	2013-12-05	1	#NULL!	#NULL!	0	0		0	#NULL!	2	0	0	2016-05-11	73	M	0	0	2016-05-11	2016-05-11	false	Premolars	2.48876	Trep1	M	Premolar
940	16	2001-05-11	Group1	2001-05-11	2001-07-05	2	#NULL!	#NULL!	0	0		0	#NULL!	0	0	0	2003-04-10	46	W	0	0	2003-04-10	2003-04-10	false	Molars	1.9138	Trep1	W	Molar
941	27	2009-08-11	Group 2	2009-08-11	2009-09-23	1	#NULL!	#NULL!	0	0		0	#NULL!	0	0	3	2016-06-27	40	M	0	0	2016-06-27	2016-06-27	false	Molars	6.87763	VitE	M	Molar
942	45	2000-08-07	Group1	2000-08-07	2000-08-23	1	#NULL!	#NULL!	0	0		extracted	2007-11-07	0	0	0	2007-12-12	73	M	3	1	2007-11-07	2007-11-07	false	Premolars	7.24999	Trep1	M	Premolar
942	12	2002-08-26	Group1	2002-08-26	2002-09-19	2	#NULL!	#NULL!	0	0		extracted	2007-11-07	2	0	0	2007-12-12	75	M	3	1	2007-11-07	2007-11-07	false	Anterior	5.19929	Trep1	M	Anterior
942	11	2004-12-02	Group1	2004-12-02	2005-01-18	1	#NULL!	#NULL!	0	0		extracted	2007-11-07	3	0	0	2007-12-12	77	M	3	1	2007-11-07	2007-11-07	false	Anterior	2.92956	Trep1	M	Anterior
942	35	2005-06-14	Group1	2005-06-14	2005-08-29	1	#NULL!	#NULL!	0	0		extracted	2007-11-07	4	0	0	2007-12-12	78	M	3	1	2007-11-07	2007-11-07	false	Premolars	2.39841	Trep1	M	Premolar
943	27	2007-06-21	Group1	2007-06-21	2007-07-05	1	2010-05-12	3	retreatment	0		0	#NULL!	1	0	0	2016-07-07	55	M	1	1	2016-07-07	2010-05-12	false	Molars	2.89123	VitE	M	Molar
944	16	2000-01-26	Group1	2000-01-26	2000-02-16	1	#NULL!	#NULL!	0	0		0	#NULL!	0	0	0	2016-07-27	20	M	0	0	2016-07-27	2016-07-27	false	Molars	16.5014	VitE	M	Molar
944	15	2000-01-26	Group1	2000-01-26	2000-01-26	0	#NULL!	#NULL!	0	0		0	#NULL!	0	0	0	2016-07-27	20	M	0	0	2016-07-27	2016-07-27	true	Premolars	16.5014	VitE	M	Premolar
945	37	2006-07-18	Group1	2006-07-19	2006-08-21	3	#NULL!	#NULL!	0	0		extracted	2010-01-13	0	0	2	2012-12-14	39	W	3	1	2010-01-13	2010-01-13	false	Molars	3.49084	VitE	W	Molar
945	12	2007-10-11	Group1	2007-10-11	2007-10-25	1	2008-03-04	1	0	root end surgery	WR	extracted	2010-08-17	1	0	2	2012-12-14	40	W	3	1	2010-08-17	2008-03-04	false	Anterior	0.396997	Trep1	W	Anterior
945	11	2010-08-09	Group 2	2010-08-09	2010-08-13	1	#NULL!	#NULL!	0	0		0	#NULL!	2	1	2	2012-12-14	43	W	0	0	2012-12-14	2012-12-14	false	Anterior	2.34913	Trep1	W	Anterior
946	13	2009-04-15	Group 2	2009-04-15	2009-05-13	1	#NULL!	#NULL!	0	0		0	#NULL!	0	0	0	2013-11-27	71	M	0	0	2013-11-27	2013-11-27	false	Anterior	4.61886	Trep1	M	Anterior
947	14	2001-07-30	Group1	2001-07-30	2001-08-20	1	#NULL!	#NULL!	0	0		extracted	2011-09-19	0	0	7	2016-04-12	45	W	3	1	2011-09-19	2011-09-19	false	Premolars	10.1385	VitE	W	Premolar
947	12	2006-08-21	Group1	2006-08-21	2006-09-04	3	#NULL!	#NULL!	0	0		0	#NULL!	1	0	7	2016-04-12	50	W	0	0	2016-04-12	2016-04-12	false	Anterior	9.64292	Trep1	W	Anterior
947	21	2007-06-12	Group1	2007-06-12	2007-08-01	4	#NULL!	#NULL!	0	0		0	#NULL!	2	0	7	2016-04-12	51	W	0	0	2016-04-12	2016-04-12	false	Anterior	8.83524	VitE	W	Anterior
947	13	2007-09-20	Group1	2007-09-20	2007-09-27	1	#NULL!	#NULL!	0	0		0	#NULL!	3	1	7	2016-04-12	51	W	0	0	2016-04-12	2016-04-12	false	Anterior	8.56145	VitE	W	Anterior
947	23	2011-10-17	Group 2	2011-11-02	2011-11-02	0	#NULL!	#NULL!	0	0		0	#NULL!	4	0	7	2016-04-12	55	W	0	0	2016-04-12	2016-04-12	true	Anterior	4.48744	Trep1	W	Anterior
948	48	2005-07-06	Group1	#NULL!	2005-07-06	0	#NULL!	#NULL!	0	0		extracted	2010-01-27	0	0	0	2016-02-01	53	M	3	1	2010-01-27	2010-01-27	false	Molars	4.56136	VitE	M	Molar
948	13	2008-09-22	Group1	2008-09-22	2008-10-07	1	#NULL!	#NULL!	0	0		extracted	2011-06-06	0	0	0	2016-02-01	56	M	3	1	2011-06-06	2011-06-06	false	Anterior	2.70232	VitE	M	Anterior
948	15	2008-11-04	Group1	2008-11-04	2008-12-18	1	#NULL!	#NULL!	0	0		0	#NULL!	2	0	6	2016-02-01	56	M	0	0	2016-02-01	2016-02-01	false	Premolars	7.24177	VitE	M	Premolar
948	35	2010-09-15	Group 2	2010-09-15	2010-10-19	1	#NULL!	#NULL!	0	0		0	#NULL!	3	0	6	2016-02-01	58	M	0	0	2016-02-01	2016-02-01	false	Premolars	5.37999	Trep1	M	Premolar
949	36	2007-06-18	Group1	2007-06-18	2007-07-23	3	#NULL!	#NULL!	0	0		0	#NULL!	0	0	1	2016-04-19	38	W	0	0	2016-04-19	2016-04-19	false	Molars	8.83798	Trep1	W	Molar
950	41	2010-10-11	Group 2	2010-10-11	2010-12-07	1	#NULL!	#NULL!	0	0		0	#NULL!	0	0	1	2016-01-28	57	W	0	0	2016-01-28	2016-01-28	false	Anterior	5.29786	Trep1	W	Anterior
950	31	2011-02-08	Group 2	2011-02-08	2011-03-21	1	#NULL!	#NULL!	0	0		0	#NULL!	1	0	1	2016-01-28	57	W	0	0	2016-01-28	2016-01-28	false	Anterior	4.96931	Trep1	W	Anterior
951	46	2003-12-04	Group1	2003-12-04	2004-04-29	4	#NULL!	#NULL!	0	0		extracted	2009-10-27	0	0	0	2010-07-19	33	M	3	1	2009-10-27	2009-10-27	false	Molars	5.89746	Trep1	M	Molar
951	28	2004-03-01	Group1	2004-03-01	2004-06-03	1	#NULL!	#NULL!	0	0		0	#NULL!	1	0	0	2010-07-19	33	M	0	0	2010-07-19	2010-07-19	false	Molars	6.38207	VitE	M	Molar
951	47	2004-03-11	Group1	2004-03-11	2004-04-29	1	2010-05-17	5	retreatment	0		0	#NULL!	2	0	0	2010-07-19	33	M	1	1	2010-07-19	2010-05-17	false	Molars	6.1822	VitE	M	Molar
951	25	2004-06-03	Group1	2004-06-03	2004-08-30	3	#NULL!	#NULL!	0	0		extracted	2009-10-27	3	0	0	2010-07-19	34	M	3	1	2009-10-27	2009-10-27	false	Premolars	5.39916	Trep1	M	Premolar
951	27	2004-10-11	Group1	2004-10-11	2004-11-09	2	#NULL!	#NULL!	0	0		0	#NULL!	4	0	0	2010-07-19	34	M	0	0	2010-07-19	2010-07-19	false	Molars	5.76878	VitE	M	Molar
951	17	2009-11-23	Group 2	2009-11-23	2009-12-21	3	#NULL!	#NULL!	0	0		0	#NULL!	5	0	0	2010-07-19	39	M	0	0	2010-07-19	2010-07-19	false	Molars	0.651623	VitE	M	Molar
951	26	2010-04-14	Group 2	2010-04-14	2010-05-05	1	#NULL!	#NULL!	0	0		0	#NULL!	6	0	0	2010-07-19	39	M	0	0	2010-07-19	2010-07-19	false	Molars	0.262839	Trep1	M	Molar
952	36	2007-04-19	Group1	2007-04-19	2007-06-04	5	#NULL!	#NULL!	0	0		extracted	2007-06-13	0	0	0	2008-10-28	31	W	3	1	2007-06-13	2007-06-13	false	Molars	0.150585	VitE	W	Molar
953	45	2012-06-14	Group 3	2012-06-14	2012-07-16	1	#NULL!	#NULL!	0	0		0	#NULL!	1	0	0	2016-06-08	79	M	0	0	2016-06-08	2016-06-08	false	Premolars	3.98366	Trep1	M	Premolar
954	33	2001-04-19	Group1	2001-04-19	2001-05-02	3	2003-06-30	4	retreatment	0		0	#NULL!	2	0	0	2005-12-01	41	M	1	1	2005-12-01	2003-06-30	false	Anterior	2.1958	Trep1	M	Anterior
955	26	2016-01-14	Group 3	2016-01-14	2016-02-02	1	#NULL!	#NULL!	0	0		0	#NULL!	0	0	1	2016-09-07	61	M	0	0	2016-09-07	2016-09-07	false	Molars	0.648885	VitE	M	Molar
956	37	2003-04-15	Group1	2003-04-23	2003-04-30	1	#NULL!	#NULL!	0	0		0	#NULL!	0	0	0	2008-12-09	59	M	0	0	2008-12-09	2008-12-09	false	Molars	5.65379	VitE	M	Molar
957	16	2000-06-15	Group1	2000-06-15	2000-09-28	6	#NULL!	#NULL!	0	0		0	#NULL!	0	0	0	2015-11-30	20	W	0	0	2015-11-30	2015-11-30	false	Molars	15.4582	VitE	W	Molar
957	25	2005-05-11	Group1	2005-05-11	2005-05-25	1	2009-11-25	2	retreatment	0		0	#NULL!	1	0	0	2015-11-30	25	W	1	1	2015-11-30	2009-11-25	false	Premolars	4.54219	Trep1	W	Premolar
957	27	2008-09-23	Group 2	2008-10-07	2008-10-07	1	#NULL!	#NULL!	0	0		0	#NULL!	2	0	0	2015-11-30	29	W	0	0	2015-11-30	2015-11-30	true	Molars	7.18428	VitE	W	Molar
958	45	2011-10-05	Group 2	2011-10-05	2011-11-10	1	#NULL!	#NULL!	0	0		0	#NULL!	0	0	17	2016-09-12	59	W	0	0	2016-09-12	2016-09-12	false	Premolars	4.93919	VitE	W	Premolar
958	46	2014-10-30	Group 3	2014-10-30	2014-11-24	2	#NULL!	#NULL!	0	0		0	#NULL!	1	0	6	2016-09-12	62	W	0	0	2016-09-12	2016-09-12	false	Molars	1.86999	VitE	W	Molar
959	32	2001-12-06	Group1	2001-12-06	2002-02-06	2	#NULL!	#NULL!	0	0		0	#NULL!	0	0	0	2004-10-26	55	M	0	0	2004-10-26	2004-10-26	false	Anterior	2.8885	VitE	M	Anterior
960	14	2009-03-19	Group 2	2009-03-19	2009-03-19	0	#NULL!	#NULL!	0	0		0	#NULL!	0	0	7	2016-07-05	52	W	0	0	2016-07-05	2016-07-05	true	Premolars	7.29653	VitE	W	Premolar
960	25	2015-06-30	Group 3	2015-06-30	2015-06-30	0	#NULL!	#NULL!	0	0		0	#NULL!	1	0	2	2016-07-05	59	W	0	0	2016-07-05	2016-07-05	true	Premolars	1.01576	VitE	W	Premolar
961	15	2006-08-03	Group1	2006-08-03	2006-08-15	0	2012-04-24	1	retreatment	0		0	#NULL!	0	0	1	2013-09-19	49	W	1	1	2013-09-19	2012-04-24	false	Premolars	5.72497	VitE	W	Premolar
961	46	2008-03-31	Group1	2008-03-31	2008-07-08	4	2009-09-16	3	0	root end surgery	WR	0	#NULL!	1	0	1	2013-09-19	51	W	2	1	2013-09-19	2009-09-16	false	Molars	1.46204	VitE	W	Molar
961	27	2008-04-16	Group1	2008-04-16	2008-05-29	2	#NULL!	#NULL!	0	0		0	#NULL!	2	0	1	2013-09-19	51	W	0	0	2013-09-19	2013-09-19	false	Molars	5.42654	VitE	W	Molar
962	12	2003-10-15	Group1	2003-10-15	2003-10-15	0	#NULL!	#NULL!	0	0		0	#NULL!	0	0	0	2009-07-13	63	W	0	0	2009-07-13	2009-07-13	true	Anterior	5.74414	VitE	W	Anterior
962	24	2003-11-24	Group1	2003-11-24	2003-11-24	0	#NULL!	#NULL!	0	0		0	#NULL!	1	0	0	2009-07-13	63	W	0	0	2009-07-13	2009-07-13	true	Premolars	5.63462	Trep1	W	Premolar
963	38	2002-10-22	Group1	2002-10-22	2002-11-28	2	#NULL!	#NULL!	0	0		extracted	2006-01-30	0	0	0	2016-08-30	39	W	3	1	2006-01-30	2006-01-30	false	Molars	3.27454	VitE	W	Molar
964	32	2004-05-21	Group1	2004-05-21	2004-08-03	2	2004-09-13	2	retreatment	0		0	#NULL!	0	0	0	2011-01-07	52	M	1	1	2011-01-07	2004-09-13	false	Anterior	0.31486	VitE	M	Anterior
965	26	2002-08-19	Group1	2002-08-19	2003-03-06	7	#NULL!	#NULL!	0	0		0	#NULL!	0	0	0	2007-10-01	66	W	0	0	2007-10-01	2007-10-01	false	Molars	5.11716	Trep1	W	Molar
966	45	2006-01-16	Group1	2006-01-16	2006-02-22	2	#NULL!	#NULL!	0	0		0	#NULL!	0	0	10	2016-05-12	48	M	0	0	2016-05-12	2016-05-12	false	Premolars	10.3192	VitE	M	Premolar
966	14	2013-09-19	Group 3	2013-09-19	2013-09-24	1	2014-11-12	2	retreatment	0		0	#NULL!	1	0	5	2016-05-12	55	M	1	1	2016-05-12	2014-11-12	false	Premolars	1.14718	Trep1	M	Premolar
967	14	2002-10-09	Group1	2002-10-09	2002-10-09	0	2002-12-03	2	retreatment	0		0	#NULL!	0	0	0	2016-04-19	55	W	1	1	2016-04-19	2002-12-03	true	Premolars	0.150585	VitE	W	Premolar
967	27	2002-10-16	Group1	2002-10-16	2002-10-23	1	#NULL!	#NULL!	0	0		0	#NULL!	1	0	0	2016-04-19	55	W	0	0	2016-04-19	2016-04-19	false	Molars	13.5089	VitE	W	Molar
967	37	2004-10-12	Group1	2004-10-12	2004-12-07	3	#NULL!	#NULL!	0	0		0	#NULL!	5	0	0	2016-04-19	57	W	0	0	2016-04-19	2016-04-19	false	Molars	11.5184	Trep1	W	Molar
967	26	2008-02-19	Group1	2008-02-19	2008-03-11	1	#NULL!	#NULL!	0	0		0	#NULL!	6	0	0	2016-04-19	60	W	0	0	2016-04-19	2016-04-19	false	Molars	8.16445	Trep1	W	Molar
968	36	2000-06-20	Group1	2000-06-20	2000-08-02	3	#NULL!	#NULL!	0	0		extracted	2004-06-17	0	0	1	2015-12-03	38	W	3	1	2004-06-17	2004-06-17	false	Molars	3.99187	Trep1	W	Molar
969	46	2006-11-02	Group1	2006-11-02	2006-12-28	5	#NULL!	#NULL!	0	0		0	#NULL!	0	0	0	2011-09-27	58	M	0	0	2011-09-27	2011-09-27	false	Molars	4.90086	VitE	M	Molar
970	36	1999-02-10	Group1	1999-02-10	1999-02-10	0	1999-06-07	1	retreatment	0		extracted	1999-11-25	0	0	7	2014-04-01	61	M	3	1	1999-11-25	1999-06-07	true	Molars	0.320336	VitE	M	Molar
971	47	2001-11-20	Group1	2001-11-20	2001-12-13	2	#NULL!	#NULL!	0	0		0	#NULL!	0	0	0	2010-07-26	77	W	0	0	2010-07-26	2010-07-26	false	Molars	8.67918	VitE	W	Molar
972	23	2003-10-14	Group1	2003-10-14	2003-11-04	1	#NULL!	#NULL!	0	0		0	#NULL!	1	0	0	2015-08-31	54	W	0	0	2015-08-31	2015-08-31	false	Anterior	11.8798	Trep1	W	Anterior
972	35	2003-11-20	Group1	2003-11-20	2003-12-29	3	#NULL!	#NULL!	0	0		0	#NULL!	2	0	0	2015-08-31	54	W	0	0	2015-08-31	2015-08-31	false	Premolars	11.7785	Trep1	W	Premolar
972	34	2003-11-20	Group1	2003-11-20	2003-12-29	3	#NULL!	#NULL!	0	0		0	#NULL!	2	0	0	2015-08-31	54	W	0	0	2015-08-31	2015-08-31	false	Premolars	11.7785	Trep1	W	Premolar
972	42	2003-11-27	Group1	2003-11-27	2003-12-29	2	#NULL!	#NULL!	0	0		0	#NULL!	4	0	0	2015-08-31	54	W	0	0	2015-08-31	2015-08-31	false	Anterior	11.7593	Trep1	W	Anterior
972	21	2006-01-17	Group1	2006-01-17	2006-01-17	0	#NULL!	#NULL!	0	0		extracted	2007-03-12	5	0	0	2015-08-31	56	W	3	1	2007-03-12	2007-03-12	true	Anterior	1.14718	VitE	W	Anterior
973	48	1999-08-30	Group1	1999-08-30	1999-09-29	2	#NULL!	#NULL!	0	0		0	#NULL!	0	0	9	2016-04-25	51	W	0	0	2016-04-25	2016-04-25	false	Molars	16.6547	Trep1	W	Molar
974	13	2000-04-17	Group1	2000-04-17	2000-04-17	0	#NULL!	#NULL!	0	0		extracted	2001-03-07	0	0	0	2003-06-18	78	W	3	1	2001-03-07	2001-03-07	true	Anterior	0.887083	Trep1	W	Anterior
975	45	2008-11-21	Group 2	2008-11-21	2009-01-14	2	#NULL!	#NULL!	0	0		extracted	2009-05-12	0	0	0	2010-04-29	63	W	3	1	2009-05-12	2009-05-12	false	Premolars	0.470921	VitE	W	Premolar
976	21	2002-04-30	Group1	2002-04-30	2002-06-11	1	#NULL!	#NULL!	0	0		0	#NULL!	0	0	1	2016-03-16	36	W	0	0	2016-03-16	2016-03-16	false	Anterior	13.8785	VitE	W	Anterior
976	27	2002-10-28	Group1	2002-10-28	2002-12-04	3	#NULL!	#NULL!	0	0		0	#NULL!	1	0	1	2016-03-16	37	W	0	0	2016-03-16	2016-03-16	false	Molars	13.3829	Trep1	W	Molar
976	17	2008-04-08	Group1	2008-04-08	2008-05-06	1	#NULL!	#NULL!	0	0		0	#NULL!	2	0	1	2016-03-16	42	W	0	0	2016-03-16	2016-03-16	false	Molars	7.9372	VitE	W	Molar
976	35	2009-04-22	Group1	2009-04-22	2009-05-27	2	#NULL!	#NULL!	0	0		0	#NULL!	3	0	1	2016-03-16	43	W	0	0	2016-03-16	2016-03-16	false	Premolars	6.89954	Trep1	W	Premolar
976	47	2012-06-26	Group 3	2012-06-26	2012-08-28	2	#NULL!	#NULL!	0	0		0	#NULL!	5	0	1	2016-03-16	46	W	0	0	2016-03-16	2016-03-16	false	Molars	3.72082	VitE	W	Molar
976	26	2012-09-12	Group 3	2012-09-12	2012-10-16	2	#NULL!	#NULL!	0	0		0	#NULL!	7	0	1	2016-03-16	47	W	0	0	2016-03-16	2016-03-16	false	Molars	3.50726	VitE	W	Molar
976	16	2013-08-07	Group 3	2013-08-07	2013-08-07	0	2015-05-04	2	0	root end surgery	WR	0	#NULL!	10	0	1	2016-03-16	48	W	2	1	2016-03-16	2015-05-04	true	Molars	1.73857	Trep1	W	Molar
977	34	1999-07-06	Group1	1999-07-06	1999-07-06	0	#NULL!	#NULL!	0	0		0	#NULL!	0	0	0	2007-09-20	61	W	0	0	2007-09-20	2007-09-20	true	Premolars	8.20826	VitE	W	Premolar
977	33	2005-06-21	Group1	#NULL!	2005-06-21	0	#NULL!	#NULL!	0	0		0	#NULL!	3	0	0	2007-09-20	67	W	0	0	2007-09-20	2007-09-20	false	Anterior	2.24782	VitE	W	Anterior
977	44	2005-11-23	Group1	2005-11-23	2006-03-02	4	#NULL!	#NULL!	0	0		0	#NULL!	3	0	0	2007-09-20	68	W	0	0	2007-09-20	2007-09-20	false	Premolars	1.82345	Trep1	W	Premolar
978	23	2003-05-21	Group1	2003-05-21	2003-05-21	0	#NULL!	#NULL!	0	0		extracted	2006-11-02	0	0	0	2015-09-02	64	W	3	1	2006-11-02	2006-11-02	true	Anterior	3.45251	Trep1	W	Anterior
978	22	2007-05-15	Group1	2007-05-15	2007-06-05	1	#NULL!	#NULL!	0	0		extracted	2009-12-17	1	0	0	2015-09-02	68	W	3	1	2009-12-17	2009-12-17	false	Anterior	2.5928	VitE	W	Anterior
978	34	2010-01-27	Group 2	2010-01-27	2010-02-24	1	#NULL!	#NULL!	0	0		0	#NULL!	2	0	2	2015-09-02	71	W	0	0	2015-09-02	2015-09-02	false	Premolars	5.59629	VitE	W	Premolar
979	37	2001-09-27	Group1	2001-09-27	2002-02-19	4	#NULL!	#NULL!	0	0		0	#NULL!	0	0	0	2005-03-03	56	M	0	0	2005-03-03	2005-03-03	false	Molars	3.4306	VitE	M	Molar
980	23	2003-04-24	Group1	2003-04-24	2003-05-27	3	#NULL!	#NULL!	0	0		extracted	2012-04-24	1	0	1	2013-11-25	56	M	3	1	2012-04-24	2012-04-24	false	Anterior	9.00225	VitE	M	Anterior
980	15	2013-10-16	Group 3	2013-11-25	2013-11-25	0	#NULL!	#NULL!	0	0		0	#NULL!	3	0	0	2013-11-25	66	M	0	0	2013-11-25	2013-11-25	true	Premolars	0.109516	Trep1	M	Premolar
981	47	2000-09-20	Group1	2000-09-20	2000-11-06	1	#NULL!	#NULL!	0	0		0	#NULL!	0	0	0	2011-11-03	60	M	0	0	2011-11-03	2011-11-03	false	Molars	11.1187	Trep1	M	Molar
981	11	2010-12-13	Group 2	2010-12-13	2010-12-20	1	#NULL!	#NULL!	0	0		0	#NULL!	4	0	0	2011-11-03	70	M	0	0	2011-11-03	2011-11-03	false	Anterior	0.889821	Trep1	M	Anterior
981	24	2011-05-23	Group 2	2011-05-23	2011-06-07	2	#NULL!	#NULL!	0	0		0	#NULL!	5	0	0	2011-11-03	70	M	0	0	2011-11-03	2011-11-03	false	Premolars	0.449017	Trep1	M	Premolar
982	15	2010-12-13	Group 2	2010-12-13	2011-02-22	2	#NULL!	#NULL!	0	0		0	#NULL!	0	0	4	2015-01-21	43	W	0	0	2015-01-21	2015-01-21	false	Premolars	4.10687	VitE	W	Premolar
983	13	2001-06-05	Group1	2001-06-05	2001-07-05	1	#NULL!	#NULL!	0	0		extracted	2006-07-12	0	0	0	2011-10-10	75	W	3	1	2006-07-12	2006-07-12	false	Anterior	5.10073	VitE	W	Anterior
983	25	2003-01-13	Group1	2003-01-13	2003-01-13	0	#NULL!	#NULL!	0	0		extracted	2003-03-25	2	0	0	2011-10-10	76	W	3	1	2003-03-25	2003-03-25	true	Premolars	0.194392	Trep1	W	Premolar
983	23	2003-01-13	Group1	2003-01-13	2003-01-13	0	#NULL!	#NULL!	0	0		extracted	2006-10-11	2	0	0	2011-10-10	76	W	3	1	2006-10-11	2006-10-11	true	Anterior	3.74272	Trep1	W	Anterior
983	21	2009-01-20	Group 2	2009-01-20	2009-02-11	1	#NULL!	#NULL!	0	0		extracted	2011-07-21	4	0	0	2011-10-10	82	W	3	1	2011-07-21	2011-07-21	false	Anterior	2.49697	Trep1	W	Anterior
984	47	2008-09-25	Group1	2008-09-25	2008-11-06	1	#NULL!	#NULL!	0	0		0	#NULL!	0	0	6	2016-09-08	65	M	0	0	2016-09-08	2016-09-08	false	Molars	7.95363	VitE	M	Molar
984	41	2010-01-07	Group 2	2010-01-07	2010-01-14	1	#NULL!	#NULL!	0	0		extracted	2010-07-15	1	0	6	2016-09-08	66	M	3	1	2010-07-15	2010-07-15	false	Anterior	0.517465	Trep1	M	Anterior
985	46	2006-12-21	Group1	2006-12-21	2007-04-24	7	2009-11-23	3	0	root end surgery	WR	0	#NULL!	0	0	0	2015-11-24	24	M	2	1	2015-11-24	2009-11-23	false	Molars	2.92409	VitE	M	Molar
985	12	2008-06-06	Group 2	2008-06-06	2008-10-21	3	#NULL!	#NULL!	0	0		0	#NULL!	1	1	0	2015-11-24	26	M	0	0	2015-11-24	2015-11-24	false	Anterior	7.46628	Trep1	M	Anterior
986	12	2012-10-02	Group 3	2012-10-02	2012-11-08	1	#NULL!	#NULL!	0	0		extracted	2014-11-06	0	0	1	2016-09-06	75	W	3	1	2014-11-06	2014-11-06	false	Anterior	2.0945	Trep1	W	Anterior
987	15	2002-11-20	Group1	2002-11-20	2002-12-02	1	2004-03-25	1	0	root end surgery	WR	extracted	2006-03-20	1	1	0	2016-08-10	61	M	3	1	2006-03-20	2004-03-25	false	Premolars	1.34431	Trep1	M	Premolar
988	24	1999-03-09	Group1	1999-03-09	1999-03-09	0	#NULL!	#NULL!	0	0		0	#NULL!	0	0	1	2013-08-14	51	W	0	0	2013-08-14	2013-08-14	true	Premolars	14.4343	VitE	W	Premolar
988	42	2000-09-26	Group1	2000-09-26	2000-10-24	3	#NULL!	#NULL!	0	0		0	#NULL!	1	0	1	2013-08-14	53	W	0	0	2013-08-14	2013-08-14	false	Anterior	12.8819	Trep1	W	Anterior
988	41	2000-09-26	Group1	2000-09-26	2000-10-24	3	#NULL!	#NULL!	0	0		0	#NULL!	1	0	1	2013-08-14	53	W	0	0	2013-08-14	2013-08-14	false	Anterior	12.8819	Trep1	W	Anterior
988	31	2000-09-26	Group1	2000-09-26	2000-10-24	3	#NULL!	#NULL!	0	0		0	#NULL!	1	0	1	2013-08-14	53	W	0	0	2013-08-14	2013-08-14	false	Anterior	12.8819	Trep1	W	Anterior
989	13	2001-02-14	Group1	2001-02-14	2001-08-15	5	2003-04-10	1	0	root end surgery	WR	extracted	2009-03-19	0	0	0	2012-02-14	52	M	3	1	2009-03-19	2003-04-10	false	Anterior	2.14926	Trep1	M	Anterior
989	45	2008-04-23	Group1	2008-04-23	2008-07-03	2	2010-03-04	1	retreatment	0		0	#NULL!	1	1	0	2012-02-14	59	M	1	1	2012-02-14	2010-03-04	false	Premolars	1.86178	Trep1	M	Premolar
990	14	2001-05-07	Group1	2001-05-07	2001-08-09	5	#NULL!	#NULL!	0	0		0	#NULL!	0	0	0	2006-05-26	57	M	0	0	2006-05-26	2006-05-26	false	Premolars	5.05145	Trep1	M	Premolar
991	23	2000-01-25	Group1	2000-01-25	2000-01-25	0	#NULL!	#NULL!	0	0		0	#NULL!	0	0	10	2016-09-12	56	W	0	0	2016-09-12	2016-09-12	true	Anterior	16.6328	VitE	W	Anterior
991	22	2000-01-25	Group1	2000-01-25	2000-01-25	0	#NULL!	#NULL!	0	0		0	#NULL!	0	0	10	2016-09-12	56	W	0	0	2016-09-12	2016-09-12	true	Anterior	16.6328	VitE	W	Anterior
991	35	2000-04-18	Group1	2000-04-18	2000-04-18	0	#NULL!	#NULL!	0	0		0	#NULL!	2	0	10	2016-09-12	56	W	0	0	2016-09-12	2016-09-12	true	Premolars	16.4028	Trep1	W	Premolar
991	14	2012-07-31	Group 3	2012-07-31	2012-07-31	0	#NULL!	#NULL!	0	0		extracted	2012-09-20	3	0	8	2016-09-12	68	W	3	1	2012-09-20	2012-09-20	true	Premolars	0.139633	Trep1	W	Premolar
992	45	2004-12-06	Group1	2004-12-06	2005-03-15	4	#NULL!	#NULL!	0	0		extracted	2008-09-15	0	0	0	2013-05-16	64	M	3	1	2008-09-15	2008-09-15	false	Premolars	3.77558	Trep1	M	Premolar
992	14	2006-11-23	Group1	2006-11-23	2007-02-08	1	#NULL!	#NULL!	0	0		0	#NULL!	1	0	0	2013-05-16	66	M	0	0	2013-05-16	2013-05-16	false	Premolars	6.4779	VitE	M	Premolar
992	15	2007-02-26	Group1	2007-02-26	2007-02-26	0	#NULL!	#NULL!	0	0		0	#NULL!	2	0	0	2013-05-16	66	M	0	0	2013-05-16	2013-05-16	true	Premolars	6.2178	VitE	M	Premolar
992	44	2012-04-23	Group 3	2012-04-23	2012-06-14	2	#NULL!	#NULL!	0	0		0	#NULL!	3	0	0	2013-05-16	72	M	0	0	2013-05-16	2013-05-16	false	Premolars	1.06231	VitE	M	Premolar
993	46	2003-02-07	Group1	2003-02-07	2003-03-11	4	#NULL!	#NULL!	0	0		0	#NULL!	0	0	0	2003-05-27	64	M	0	0	2003-05-27	2003-05-27	false	Molars	0.298432	Trep1	M	Molar
993	44	2003-03-11	Group1	2003-03-11	2003-05-06	2	#NULL!	#NULL!	0	0		0	#NULL!	2	0	0	2003-05-27	64	M	0	0	2003-05-27	2003-05-27	false	Premolars	0.210819	Trep1	M	Premolar
993	43	2003-03-31	Group1	2003-04-15	2003-05-06	1	#NULL!	#NULL!	0	0		0	#NULL!	3	0	0	2003-05-27	65	M	0	0	2003-05-27	2003-05-27	false	Anterior	0.156061	Trep1	M	Anterior
994	27	2003-06-24	Group1	2003-06-24	2003-08-28	2	#NULL!	#NULL!	0	0		extracted	2015-06-11	0	0	0	2016-09-07	64	M	3	1	2015-06-11	2015-06-11	false	Molars	11.9647	Trep1	M	Molar
994	34	2005-04-19	Group1	2005-04-19	2005-07-04	2	#NULL!	#NULL!	0	0		extracted	2005-11-15	1	0	0	2016-09-07	65	M	3	1	2005-11-15	2005-11-15	false	Premolars	0.574961	Trep1	M	Premolar
995	11	2012-03-14	Group 3	2012-03-14	2012-04-24	1	#NULL!	#NULL!	0	0		0	#NULL!	0	0	2	2016-06-07	25	M	0	0	2016-06-07	2016-06-07	false	Anterior	4.23281	Trep1	M	Anterior
996	13	2005-10-18	Group1	2005-10-18	2005-10-25	1	#NULL!	#NULL!	0	0		0	#NULL!	0	0	0	2014-04-30	64	M	0	0	2014-04-30	2014-04-30	false	Anterior	8.53133	Trep1	M	Anterior
996	27	2006-01-12	Group1	2006-01-12	2006-01-23	2	#NULL!	#NULL!	0	0		0	#NULL!	1	0	0	2014-04-30	64	M	0	0	2014-04-30	2014-04-30	false	Molars	8.29587	Trep1	M	Molar
997	26	2002-03-27	Group1	2002-03-27	2002-04-15	2	2010-08-11	7	retreatment	0		0	#NULL!	0	0	6	2016-06-08	58	M	1	1	2016-06-08	2010-08-11	false	Molars	8.37527	VitE	M	Molar
997	45	2003-08-29	Group1	2003-08-29	2003-10-07	2	#NULL!	#NULL!	0	0		0	#NULL!	2	0	3	2016-06-08	59	M	0	0	2016-06-08	2016-06-08	false	Premolars	12.7778	VitE	M	Premolar
997	13	2004-11-05	Group1	2004-11-05	2004-11-11	1	#NULL!	#NULL!	0	0		extracted	2006-02-13	3	0	2	2016-06-08	60	M	3	1	2006-02-13	2006-02-13	false	Anterior	1.27313	Trep1	M	Anterior
997	16	2005-04-25	Group1	2005-04-25	2005-05-18	1	#NULL!	#NULL!	0	0		extracted	2014-10-14	5	0	2	2016-06-08	61	M	3	1	2014-10-14	2014-10-14	false	Molars	9.47043	VitE	M	Molar
997	36	2006-11-06	Group1	2006-11-06	2007-03-01	5	#NULL!	#NULL!	0	0		extracted	2013-06-13	6	0	0	2016-06-08	62	M	3	1	2013-06-13	2013-06-13	false	Molars	6.6011	Trep1	M	Molar
997	32	2013-06-05	Group 3	2013-06-05	2013-06-05	0	#NULL!	#NULL!	0	0		0	#NULL!	10	0	3	2016-06-08	69	M	0	0	2016-06-08	2016-06-08	true	Anterior	3.00896	Trep1	M	Anterior
997	14	2013-08-05	Group 3	2013-08-05	2013-08-20	2	#NULL!	#NULL!	0	0		0	#NULL!	11	0	3	2016-06-08	69	M	0	0	2016-06-08	2016-06-08	false	Premolars	2.84195	Trep1	M	Premolar
997	23	2014-04-02	Group 3	2014-04-02	2014-04-02	0	#NULL!	#NULL!	0	0		0	#NULL!	12	0	2	2016-06-08	70	M	0	0	2016-06-08	2016-06-08	true	Anterior	2.18485	Trep1	M	Anterior
998	27	2006-07-31	Group1	2006-08-07	2006-08-10	1	#NULL!	#NULL!	0	0		extracted	2008-11-12	0	0	0	2009-04-14	37	M	3	1	2008-11-12	2008-11-12	false	Molars	2.28616	Trep1	M	Molar
999	43	2000-04-11	Group1	2000-04-11	2000-04-11	0	2013-04-24	5	retreatment	0		extracted	2013-10-24	0	0	1	2013-11-27	54	M	3	1	2013-10-24	2013-04-24	true	Anterior	13.0352	Trep1	M	Anterior
1000	33	2002-03-12	Group1	2002-03-12	2002-04-15	1	#NULL!	#NULL!	0	0		extracted	2009-09-28	0	0	0	2010-12-01	72	M	3	1	2009-09-28	2009-09-28	false	Anterior	7.54842	VitE	M	Anterior
1000	38	2002-03-12	Group1	2002-03-12	2002-04-18	1	#NULL!	#NULL!	0	0		0	#NULL!	0	0	0	2010-12-01	72	M	0	0	2010-12-01	2010-12-01	false	Molars	8.72298	VitE	M	Molar
1000	43	2010-02-01	Group 2	2010-02-01	2010-02-18	1	#NULL!	#NULL!	0	0		0	#NULL!	5	0	0	2010-12-01	80	M	0	0	2010-12-01	2010-12-01	false	Anterior	0.829587	Trep1	M	Anterior
1000	42	2010-02-18	Group 2	2010-02-18	2010-02-23	1	#NULL!	#NULL!	0	0		0	#NULL!	6	0	0	2010-12-01	80	M	0	0	2010-12-01	2010-12-01	false	Anterior	0.783042	VitE	M	Anterior
1000	41	2010-03-15	Group 2	2010-03-15	2010-03-15	0	#NULL!	#NULL!	0	0		0	#NULL!	7	0	0	2010-12-01	80	M	0	0	2010-12-01	2010-12-01	true	Anterior	0.714595	Trep1	M	Anterior
1000	31	2010-04-12	Group 2	2010-04-12	2010-04-12	0	#NULL!	#NULL!	0	0		0	#NULL!	8	0	0	2010-12-01	80	M	0	0	2010-12-01	2010-12-01	true	Anterior	0.637933	Trep1	M	Anterior
1001	12	2005-01-25	Group1	2005-01-25	2005-03-29	5	#NULL!	#NULL!	0	0		0	#NULL!	0	0	0	2005-10-18	26	M	0	0	2005-10-18	2005-10-18	false	Anterior	0.728284	Trep1	M	Anterior
1002	12	2005-02-28	Group1	2005-02-28	2005-03-07	1	#NULL!	#NULL!	0	0		extracted	2013-07-16	0	0	0	2016-08-01	51	M	3	1	2013-07-16	2013-07-16	false	Anterior	8.37801	VitE	M	Anterior
1002	23	2007-02-26	Group1	2007-02-26	2007-03-05	1	#NULL!	#NULL!	0	0		extracted	2013-07-16	1	0	0	2016-08-01	53	M	3	1	2013-07-16	2013-07-16	false	Anterior	6.38481	VitE	M	Anterior
1003	42	2005-06-29	Group1	2005-06-29	2005-08-10	1	#NULL!	#NULL!	0	0		extracted	2009-07-10	0	0	0	2009-07-16	86	W	3	1	2009-07-10	2009-07-10	false	Anterior	4.0302	VitE	W	Anterior
1004	36	2008-05-28	Group1	2008-05-28	2008-08-21	2	2010-09-14	5	0	root end surgery	WR	0	#NULL!	0	0	1	2013-11-14	29	M	2	1	2013-11-14	2010-09-14	false	Molars	2.29711	VitE	M	Molar
1005	17	2006-11-13	Group1	2006-11-13	2007-01-22	2	#NULL!	#NULL!	0	0		0	#NULL!	0	0	0	2008-12-03	56	W	0	0	2008-12-03	2008-12-03	false	Molars	2.05617	VitE	W	Molar
1006	26	2004-05-24	Group1	2004-05-24	2004-06-17	2	#NULL!	#NULL!	0	0		0	#NULL!	0	0	0	2004-06-17	54	M	0	0	2004-06-17	2004-06-17	false	Molars	0.0657099	VitE	M	Molar
1007	17	2006-11-20	Group1	#NULL!	2006-12-06	0	#NULL!	#NULL!	0	0		0	#NULL!	0	0	7	2016-04-27	54	W	0	0	2016-04-27	2016-04-27	false	Molars	9.43484	VitE	W	Molar
1008	35	2007-03-08	Group1	2007-03-08	2007-03-13	1	#NULL!	#NULL!	0	0		0	#NULL!	0	0	0	2009-11-11	32	W	0	0	2009-11-11	2009-11-11	false	Premolars	2.68041	VitE	W	Premolar
1008	25	2009-02-04	Group 2	2009-02-04	2009-02-04	0	#NULL!	#NULL!	0	0		0	#NULL!	1	0	0	2009-11-11	34	W	0	0	2009-11-11	2009-11-11	true	Premolars	0.766615	VitE	W	Premolar
1008	14	2009-06-18	Group 2	2009-06-18	2009-08-21	2	#NULL!	#NULL!	0	0		0	#NULL!	3	0	0	2009-11-11	34	W	0	0	2009-11-11	2009-11-11	false	Premolars	0.399735	Trep1	W	Premolar
1008	15	2009-09-28	Group 2	2009-09-28	2009-11-05	1	#NULL!	#NULL!	0	0		0	#NULL!	4	0	0	2009-11-11	35	W	0	0	2009-11-11	2009-11-11	false	Premolars	0.120468	Trep1	W	Premolar
1009	23	2009-05-12	Group 2	2009-05-12	2009-08-20	3	#NULL!	#NULL!	0	0		0	#NULL!	0	0	0	2010-02-01	55	M	0	0	2010-02-01	2010-02-01	false	Anterior	0.725546	VitE	M	Anterior
1009	37	2009-08-24	Group 2	2009-08-24	2009-10-28	4	#NULL!	#NULL!	0	0		0	#NULL!	1	0	0	2010-02-01	55	M	0	0	2010-02-01	2010-02-01	false	Molars	0.440804	VitE	M	Molar
1010	11	2012-01-09	Group 3	2012-01-09	2012-02-27	2	#NULL!	#NULL!	0	0		0	#NULL!	0	0	10	2016-09-22	56	W	0	0	2016-09-22	2016-09-22	false	Anterior	4.70373	Trep1	W	Anterior
1010	46	2013-02-21	Group 3	2013-02-21	2013-03-25	1	#NULL!	#NULL!	0	0		0	#NULL!	1	0	6	2016-09-22	57	W	0	0	2016-09-22	2016-09-22	false	Molars	3.58393	Trep1	W	Molar
1011	21	2007-12-21	Group1	2007-12-21	2008-01-16	1	#NULL!	#NULL!	0	0		0	#NULL!	0	0	0	2008-07-21	29	M	0	0	2008-07-21	2008-07-21	false	Anterior	0.583175	Trep1	M	Anterior
1011	35	2008-02-13	Group1	2008-02-13	2008-07-21	3	#NULL!	#NULL!	0	0		0	#NULL!	1	0	0	2008-07-21	29	M	0	0	2008-07-21	2008-07-21	false	Premolars	0.435328	Trep1	M	Premolar
1012	21	2003-01-21	Group1	2003-01-21	2003-04-22	1	#NULL!	#NULL!	0	0		0	#NULL!	0	0	0	2003-04-24	21	M	0	0	2003-04-24	2003-04-24	false	Anterior	0.254626	Trep1	M	Anterior
1013	44	2001-07-17	Group1	2001-07-17	2001-10-18	4	#NULL!	#NULL!	0	0		0	#NULL!	0	0	0	2015-10-15	60	W	0	0	2015-10-15	2015-10-15	false	Premolars	14.2453	VitE	W	Premolar
1013	17	2003-11-27	Group1	2014-06-11	2003-12-02	1	2014-06-11	5	0	root end surgery	WR	0	#NULL!	3	0	0	2015-10-15	62	W	2	1	2015-10-15	2014-06-11	false	Molars	10.5382	VitE	W	Molar
1014	43	2005-08-23	Group1	2005-08-23	2005-09-20	1	2008-09-25	1	0	root end surgery	WR	0	#NULL!	0	0	0	2016-06-14	57	W	2	1	2016-06-14	2008-09-25	false	Anterior	3.0911	Trep1	W	Anterior
1015	45	2000-06-05	Group1	2000-06-05	2000-11-28	8	#NULL!	#NULL!	0	0		extracted	2015-05-21	0	0	8	2016-09-13	63	M	3	1	2015-05-21	2015-05-21	false	Premolars	14.9572	Trep1	M	Premolar
1015	27	2004-06-24	Group1	2004-06-24	2004-07-08	1	#NULL!	#NULL!	0	0		extracted	2011-06-27	1	0	8	2016-09-13	67	M	3	1	2011-06-27	2011-06-27	false	Molars	7.00631	Trep1	M	Molar
1015	16	2006-09-26	Group1	2006-09-26	2007-01-11	2	#NULL!	#NULL!	0	0		0	#NULL!	2	0	9	2016-09-13	69	M	0	0	2016-09-13	2016-09-13	false	Molars	9.966	Trep1	M	Molar
1015	22	2007-11-26	Group1	2007-11-26	2007-12-13	2	#NULL!	#NULL!	0	0		0	#NULL!	3	0	9	2016-09-13	70	M	0	0	2016-09-13	2016-09-13	false	Anterior	8.79965	VitE	M	Anterior
1016	26	2002-06-11	Group1	2002-06-11	2002-08-26	4	#NULL!	#NULL!	0	0		0	#NULL!	0	0	1	2015-08-05	32	M	0	0	2015-08-05	2015-08-05	false	Molars	13.1502	VitE	M	Molar
1016	46	2015-05-08	Group 3	2015-05-08	2015-05-28	1	#NULL!	#NULL!	0	0		0	#NULL!	2	0	1	2015-08-05	45	M	0	0	2015-08-05	2015-08-05	false	Molars	0.243674	VitE	M	Molar
1017	36	2003-04-25	Group1	2003-04-25	2003-10-22	6	#NULL!	#NULL!	0	0		0	#NULL!	1	0	0	2010-06-29	46	M	0	0	2010-06-29	2010-06-29	false	Molars	7.1788	Trep1	M	Molar
1018	33	2009-04-30	Group 2	2009-04-30	2009-04-30	0	#NULL!	#NULL!	0	0		0	#NULL!	1	0	0	2015-10-08	79	W	0	0	2015-10-08	2015-10-08	true	Anterior	6.43957	VitE	W	Anterior
1019	22	2001-01-18	Group1	#NULL!	2001-02-20	1	#NULL!	#NULL!	0	0		0	#NULL!	0	0	0	2008-01-04	58	M	0	0	2008-01-04	2008-01-04	false	Anterior	6.95977	VitE	M	Anterior
1019	25	2001-08-20	Group1	2001-08-20	2001-09-04	1	#NULL!	#NULL!	0	0		0	#NULL!	0	0	0	2008-01-04	59	M	0	0	2008-01-04	2008-01-04	false	Premolars	6.37386	VitE	M	Premolar
1020	12	2004-06-17	Group1	2004-06-17	2004-07-01	1	#NULL!	#NULL!	0	0		0	#NULL!	0	0	0	2006-08-24	57	W	0	0	2006-08-24	2006-08-24	false	Anterior	2.18485	VitE	W	Anterior
1021	11	1999-12-15	Group1	1999-12-15	2000-01-18	1	#NULL!	#NULL!	0	0		0	#NULL!	0	0	0	2003-07-14	75	W	0	0	2003-07-14	2003-07-14	false	Anterior	3.57845	Trep1	W	Anterior
1022	26	2004-06-22	Group1	2004-06-22	2004-06-22	0	#NULL!	#NULL!	0	0		0	#NULL!	0	0	0	2006-07-27	52	M	0	0	2006-07-27	2006-07-27	true	Molars	2.0945	VitE	M	Molar
1022	16	2005-12-16	Group1	2005-12-16	2006-07-27	2	#NULL!	#NULL!	0	0		extracted	2006-04-05	1	0	0	2006-07-27	53	M	3	1	2006-04-05	2006-04-05	false	Molars	0.30117	VitE	M	Molar
1023	36	2002-11-14	Group1	2002-11-14	2002-12-09	2	#NULL!	#NULL!	0	0		extracted	2010-07-12	0	0	10	2016-05-30	51	M	3	1	2010-07-12	2010-07-12	false	Molars	7.65794	Trep1	M	Molar
1024	13	2005-10-21	Group1	2005-10-21	2005-11-24	1	#NULL!	#NULL!	0	0		extracted	2009-01-14	0	0	0	2016-07-12	63	W	3	1	2009-01-14	2009-01-14	false	Anterior	3.23347	Trep1	W	Anterior
1024	12	2010-08-19	Group 2	2010-08-19	2010-10-21	2	#NULL!	#NULL!	0	0		0	#NULL!	1	0	10	2016-07-12	68	W	0	0	2016-07-12	2016-07-12	false	Anterior	5.89746	VitE	W	Anterior
1025	44	2002-01-24	Group1	2002-01-24	2002-01-31	1	2002-08-01	1	retreatment	0		0	#NULL!	0	0	4	2014-04-23	67	M	1	1	2014-04-23	2002-08-01	false	Premolars	0.517465	Trep1	M	Premolar
1025	45	2002-08-01	Group1	2002-08-01	2002-08-07	1	#NULL!	#NULL!	0	0		0	#NULL!	2	0	4	2014-04-23	67	M	0	0	2014-04-23	2014-04-23	false	Premolars	11.7265	Trep1	M	Premolar
1025	12	2004-11-22	Group1	2004-11-22	2004-11-22	0	#NULL!	#NULL!	0	0		extracted	2009-12-09	3	0	0	2014-04-23	70	M	3	1	2009-12-09	2009-12-09	true	Anterior	5.04597	VitE	M	Anterior
1025	11	2010-10-13	Group 2	2010-10-13	2010-11-02	1	#NULL!	#NULL!	0	0		0	#NULL!	4	0	4	2014-04-23	75	M	0	0	2014-04-23	2014-04-23	false	Anterior	3.52643	Trep1	M	Anterior
1026	13	2011-02-01	Group 2	2011-02-01	2011-02-01	0	#NULL!	#NULL!	0	0		extracted	2011-11-24	0	0	0	2015-06-30	74	M	3	1	2011-11-24	2011-11-24	true	Anterior	0.810422	VitE	M	Anterior
1027	45	2002-02-11	Group1	2002-02-11	2002-02-20	2	#NULL!	#NULL!	0	0		0	#NULL!	0	0	0	2012-02-01	58	W	0	0	2012-02-01	2012-02-01	false	Premolars	9.97147	Trep1	W	Premolar
1028	23	2008-05-20	Group1	2008-05-20	2008-06-24	1	#NULL!	#NULL!	0	0		0	#NULL!	0	0	0	2011-09-13	70	M	0	0	2011-09-13	2011-09-13	false	Anterior	3.31561	Trep1	M	Anterior
1029	12	2000-01-25	Group1	2000-01-25	2000-01-25	0	#NULL!	#NULL!	0	0		extracted	2010-01-13	0	0	2	2015-08-04	62	W	3	1	2010-01-13	2010-01-13	true	Anterior	9.96873	VitE	W	Anterior
1029	26	2004-12-16	Group1	2004-12-16	2005-01-24	3	#NULL!	#NULL!	0	0		extracted	2009-11-17	1	0	0	2015-08-04	67	W	3	1	2009-11-17	2009-11-17	false	Molars	4.92003	Trep1	W	Molar
1029	13	2007-10-29	Group1	2007-10-29	2007-12-19	3	#NULL!	#NULL!	0	0		extracted	2010-01-13	2	0	0	2015-08-04	70	W	3	1	2010-01-13	2010-01-13	false	Anterior	2.20949	VitE	W	Anterior
1030	46	2006-09-26	Group1	2006-09-26	2006-10-26	2	#NULL!	#NULL!	0	0		0	#NULL!	0	0	0	2008-09-09	44	M	0	0	2008-09-09	2008-09-09	false	Molars	1.95487	Trep1	M	Molar
1031	15	2002-12-16	Group1	2002-12-16	2003-02-24	2	#NULL!	#NULL!	0	0		0	#NULL!	0	0	0	2003-03-17	75	M	0	0	2003-03-17	2003-03-17	false	Premolars	0.24915	Trep1	M	Premolar
1032	14	2014-10-21	Group 3	2014-10-21	2014-12-16	1	#NULL!	#NULL!	0	0		0	#NULL!	0	0	2	2016-07-18	63	M	0	0	2016-07-18	2016-07-18	false	Premolars	1.74131	Trep1	M	Premolar
1033	43	2010-11-29	Group 2	2010-11-29	2011-03-01	3	#NULL!	#NULL!	0	0		0	#NULL!	0	0	2	2014-03-05	33	W	0	0	2014-03-05	2014-03-05	false	Anterior	3.26359	Trep1	W	Anterior
1034	44	2001-02-01	Group1	2001-02-01	2001-03-29	1	#NULL!	#NULL!	0	0		0	#NULL!	0	0	0	2003-06-02	51	M	0	0	2003-06-02	2003-06-02	false	Premolars	2.32996	Trep1	M	Premolar
1035	45	2005-03-21	Group1	2005-03-21	2005-06-06	3	#NULL!	#NULL!	0	0		extracted	2015-09-15	0	0	3	2016-06-06	47	W	3	1	2015-09-15	2015-09-15	false	Premolars	10.4862	Trep1	W	Premolar
1036	47	2000-08-22	Group1	2000-08-22	2000-11-21	3	#NULL!	#NULL!	0	0		0	#NULL!	0	0	0	2016-06-06	63	M	0	0	2016-06-06	2016-06-06	false	Molars	15.7895	Trep1	M	Molar
1036	45	2007-10-04	Group1	2007-10-04	2007-10-25	1	#NULL!	#NULL!	0	0		0	#NULL!	1	0	0	2016-06-06	70	M	0	0	2016-06-06	2016-06-06	false	Premolars	8.6737	Trep1	M	Premolar
1037	16	2001-05-15	Group1	2001-05-15	2001-09-06	4	#NULL!	#NULL!	0	0		0	#NULL!	0	0	4	2016-09-26	32	W	0	0	2016-09-26	2016-09-26	false	Molars	15.3679	Trep1	W	Molar
1037	37	2001-10-31	Group1	2001-10-31	2002-01-09	5	#NULL!	#NULL!	0	0		0	#NULL!	1	0	4	2016-09-26	33	W	0	0	2016-09-26	2016-09-26	false	Molars	14.9052	VitE	W	Molar
1037	46	2006-01-11	Group1	2006-01-11	2006-03-06	2	#NULL!	#NULL!	0	0		extracted	2012-04-04	2	0	4	2016-09-26	37	W	3	1	2012-04-04	2012-04-04	false	Molars	6.22875	Trep1	W	Molar
1038	36	2009-06-29	Group1	2009-06-29	2009-06-29	0	#NULL!	#NULL!	0	0		0	#NULL!	0	0	4	2016-07-25	52	M	0	0	2016-07-25	2016-07-25	true	Molars	7.07202	Trep1	M	Molar
1039	17	2003-12-08	Group1	2003-12-08	2003-12-17	1	#NULL!	#NULL!	0	0		0	#NULL!	0	0	6	2016-06-07	41	M	0	0	2016-06-07	2016-06-07	false	Molars	12.4986	Trep1	M	Molar
1039	16	2014-11-11	Group 3	2014-11-11	2014-11-27	1	#NULL!	#NULL!	0	0		0	#NULL!	1	0	5	2016-06-07	52	M	0	0	2016-06-07	2016-06-07	false	Molars	1.57156	Trep1	M	Molar
1040	46	2004-12-24	Group1	2004-12-24	2005-03-24	4	#NULL!	#NULL!	0	0		0	#NULL!	0	0	0	2008-09-09	46	W	0	0	2008-09-09	2008-09-09	false	Molars	3.70987	Trep1	W	Molar
1040	45	2005-05-03	Group1	2005-05-03	2005-07-05	1	#NULL!	#NULL!	0	0		0	#NULL!	1	0	0	2008-09-09	47	W	0	0	2008-09-09	2008-09-09	false	Premolars	3.35394	Trep1	W	Premolar
1041	11	2001-07-16	Group1	2001-07-16	2001-09-03	3	2014-01-30	5	retreatment	0		0	#NULL!	0	0	1	2016-09-22	12	M	1	1	2016-09-22	2014-01-30	false	Anterior	12.5424	Trep1	M	Anterior
1041	22	2001-07-16	Group1	2001-07-16	2001-09-12	3	#NULL!	#NULL!	0	0		0	#NULL!	0	0	1	2016-09-22	12	M	0	0	2016-09-22	2016-09-22	false	Anterior	15.1872	Trep1	M	Anterior
1042	23	2001-09-17	Group1	2001-09-17	2001-10-09	2	#NULL!	#NULL!	0	0		0	#NULL!	0	0	0	2016-08-08	61	M	0	0	2016-08-08	2016-08-08	false	Anterior	14.8915	VitE	M	Anterior
1043	26	2006-01-27	Group1	2006-03-02	2006-04-10	2	#NULL!	#NULL!	0	0		0	#NULL!	0	0	0	2011-09-01	41	W	0	0	2011-09-01	2011-09-01	false	Molars	5.59355	Trep1	W	Molar
1043	22	2006-08-29	Group1	2006-08-29	2006-10-05	1	#NULL!	#NULL!	0	0		0	#NULL!	1	0	0	2011-09-01	42	W	0	0	2011-09-01	2011-09-01	false	Anterior	5.00764	Trep1	W	Anterior
1043	21	2006-08-29	Group1	2006-08-29	2006-10-05	1	#NULL!	#NULL!	0	0		0	#NULL!	1	0	0	2011-09-01	42	W	0	0	2011-09-01	2011-09-01	false	Anterior	5.00764	Trep1	W	Anterior
1044	16	2003-11-27	Group1	2003-11-27	2003-11-27	0	#NULL!	#NULL!	0	0		0	#NULL!	1	0	0	2007-06-28	61	W	0	0	2007-06-28	2007-06-28	true	Molars	3.58393	VitE	W	Molar
1044	33	2005-03-03	Group1	2005-03-03	2005-03-03	0	#NULL!	#NULL!	0	0		0	#NULL!	4	0	0	2007-06-28	62	W	0	0	2007-06-28	2007-06-28	true	Anterior	2.31901	VitE	W	Anterior
1045	26	2007-04-13	Group1	2007-04-16	2007-05-02	2	#NULL!	#NULL!	0	0		0	#NULL!	0	0	0	2013-12-23	21	M	0	0	2013-12-23	2013-12-23	false	Molars	6.69693	VitE	M	Molar
1046	23	2010-08-04	Group 2	2010-08-04	2010-08-11	1	#NULL!	#NULL!	0	0		0	#NULL!	0	0	2	2016-08-05	54	W	0	0	2016-08-05	2016-08-05	false	Anterior	6.00424	VitE	W	Anterior
1047	26	2006-08-22	Group1	2006-08-22	2006-09-11	2	#NULL!	#NULL!	0	0		0	#NULL!	0	0	0	2009-02-26	22	W	0	0	2009-02-26	2009-02-26	false	Molars	2.51614	Trep1	W	Molar
1048	25	1999-10-04	Group1	1999-10-04	2000-02-14	4	2005-06-15	5	retreatment	0		extracted	2005-06-22	0	0	8	2016-09-07	49	W	3	1	2005-06-22	2005-06-15	false	Premolars	5.69759	Trep1	W	Premolar
1048	46	2009-01-26	Group 2	2009-01-26	2009-02-19	1	#NULL!	#NULL!	0	0		extracted	2016-06-21	5	0	3	2016-09-07	58	W	3	1	2016-06-21	2016-06-21	false	Molars	7.40057	VitE	W	Molar
1048	14	2012-07-10	Group 3	2012-07-10	2012-07-10	0	#NULL!	#NULL!	0	0		extracted	2013-01-07	6	0	3	2016-09-07	62	W	3	1	2013-01-07	2013-01-07	true	Premolars	0.495562	VitE	W	Premolar
1049	32	2007-10-30	Group1	2007-10-30	2007-11-29	1	#NULL!	#NULL!	0	0		0	#NULL!	0	0	9	2016-05-23	60	M	0	0	2016-05-23	2016-05-23	false	Anterior	8.56418	Trep1	M	Anterior
1049	13	2008-12-09	Group1	2008-12-09	2008-12-23	2	#NULL!	#NULL!	0	0		extracted	2010-05-04	1	0	9	2016-05-23	62	M	3	1	2010-05-04	2010-05-04	false	Anterior	1.39907	Trep1	M	Anterior
[truncated: 7,939 more rows]
